# Supplementary material
Source: MDPI journal article supplement (https://www.mdpi.com/2624-8549/5/2/65)
Supplement: s1 [file s1]

Archive with 5 entries (5 files):
- Cammiade_AC80_Co-DMT.cif
- Cammiade_AC82_Mg-DMT.cif
- checkcif_Co-CP.pdf
- checkcif_Mg-MOF.pdf
- Supporting Information_final.pdf
