# Supplementary material
Source: MDPI journal article supplement (https://www.mdpi.com/2624-8549/5/2/65)
Supplement: s1 [file s1 › Cammiade_AC80_Co-DMT.cif]

data_ag_cammiade_ac80_2_0m
_exptl_crystal_preparation        ?
_audit_creation_date              2021-07-18
_publ_section_references
;
Dolomanov, O.V., Bourhis, L.J., Gildea, R.J, Howard, J.A.K. & Puschmann, H.
 (2009), J. Appl. Cryst. 42, 339-341.

Sheldrick, G.M. (2008). Acta Cryst. A64, 112-122.

Sheldrick, G.M. (2015). Acta Cryst. A71, 3-8.
;
_audit_contact_author_name        ''
_audit_contact_author_email       ?
_audit_contact_author_address     ?
_audit_contact_author_phone       ?
_publ_contact_author_id_orcid     ?
_diffrn_source_power              0.045
_audit_creation_method
;
FinalCif V86 by Daniel Kratzert, Freiburg 2021,
https://github.com/dkratzert/FinalCif
;
_shelx_SHELXL_version_number      '2018/3'
_chemical_name_systematic         ?
_chemical_name_common             ?
_chemical_formula_sum             'C10 H8 Co O6'
_chemical_formula_moiety          'C10 H8 Co O6'
_exptl_crystal_colour_lustre      clear
_exptl_crystal_colour_modifier    pinkish
_exptl_crystal_colour_primary     violet
_chemical_formula_weight          283.09
_chemical_melting_point           ?
_olex2_refinement_description
;
1. Fixed Uiso
 At 1.2 times of:
  All C(H) groups
 At 1.5 times of:
  All C(H,H,H) groups
2.a Aromatic/amide H refined with riding coordinates:
 C3(H3)
2.b Idealised Me refined as rotating group:
 C5(H5A,H5B,H5C)
;
_olex2_submission_special_instructions 'No special instructions were received'
_space_group_crystal_system       'monoclinic'
_space_group_IT_number            15
_space_group_name_H-M_alt         'C 1 2/c 1'
_space_group_name_Hall            '-C 2yc'
_shelx_space_group_comment
;
The symmetry employed for this shelxl refinement is uniquely defined
by the following loop, which should always be used as a source of
symmetry information in preference to the above space-group names.
They are only intended as comments.
;

loop_
_space_group_symop_operation_xyz
'x, y, z'
'-x, y, -z+1/2'
'x+1/2, y+1/2, z'
'-x+1/2, y+1/2, -z+1/2'
'-x, -y, -z'
'x, -y, z-1/2'
'-x+1/2, -y+1/2, -z'
'x+1/2, -y+1/2, z-1/2'

_cell_length_a                    16.1305(5)
_cell_length_b                    8.6024(3)
_cell_length_c                    7.3426(2)
_cell_angle_alpha                 90
_cell_angle_beta                  96.4250(10)
_cell_angle_gamma                 90
_cell_volume                      1012.47(5)
_cell_formula_units_Z             4
_cell_measurement_temperature     100(2)
_cell_measurement_reflns_used     9911
_cell_measurement_theta_min       2.98
_cell_measurement_theta_max       26.44
_exptl_crystal_description        block
_exptl_crystal_colour             'clear pinkish violet'
_exptl_crystal_recrystallization_method ?
_exptl_crystal_density_meas       ?
_exptl_crystal_density_method     ?
_exptl_crystal_density_diffrn     1.857
_exptl_crystal_F_000              572
_exptl_crystal_size_max           0.16
_exptl_crystal_size_mid           0.14
_exptl_crystal_size_min           0.11
_exptl_absorpt_coefficient_mu     0.889
_exptl_absorpt_correction_type    multi-scan
_exptl_absorpt_correction_T_min   0.7032
_exptl_absorpt_correction_T_max   0.7454
_exptl_absorpt_process_details
;
SADABS-2016/2 (Bruker,2016/2) was used for absorption correction.
wR2(int) was 0.1251 before and 0.0459 after correction.
The Ratio of minimum to maximum transmission is 0.9434.
The \l/2 correction factor is Not present.
;
_exptl_absorpt_special_details    ?
_shelx_estimated_absorpt_T_min    0.871
_shelx_estimated_absorpt_T_max    0.909
_exptl_transmission_factor_min    ?
_exptl_transmission_factor_max    ?
_exptl_special_details            ?
_diffrn_ambient_temperature       100(2)
_diffrn_ambient_environment       ?
_diffrn_radiation_type            AgK\a
_diffrn_radiation_wavelength      0.56086
_diffrn_radiation_monochromator   ?
_diffrn_radiation_probe           ?
_diffrn_source                    ?
_diffrn_source_type               ?
_diffrn_source_voltage            50.0
_diffrn_source_current            0.9
_diffrn_detector                  ?
_diffrn_detector_type             ?
_diffrn_detector_area_resol_mean  ?
_diffrn_measurement_device        ?
_diffrn_measurement_device_type   'Bruker D8 Venture'
_diffrn_measurement_method        '\f and \w scans'
_diffrn_measurement_specimen_support ?
_diffrn_reflns_number             15620
_diffrn_reflns_av_unetI/netI      0.0180
_diffrn_reflns_av_R_equivalents   0.0298
_diffrn_reflns_theta_min          2.120
_diffrn_reflns_theta_max          26.452
_diffrn_reflns_theta_full         19.665
_diffrn_reflns_limit_h_min        -25
_diffrn_reflns_limit_h_max        25
_diffrn_reflns_limit_k_min        -13
_diffrn_reflns_limit_k_max        13
_diffrn_reflns_limit_l_min        -11
_diffrn_reflns_limit_l_max        11
_diffrn_standards_number          0
_diffrn_measured_fraction_theta_max 0.998
_diffrn_measured_fraction_theta_full 0.998
_diffrn_reflns_Laue_measured_fraction_max 0.998
_diffrn_reflns_Laue_measured_fraction_full 0.998
_diffrn_reflns_point_group_measured_fraction_max 0.998
_diffrn_reflns_point_group_measured_fraction_full 0.998
_reflns_number_total              2133
_reflns_number_gt                 2029
_reflns_threshold_expression      'I > 2\s(I)'
_reflns_Friedel_coverage          0.000
_reflns_Friedel_fraction_max      .
_reflns_Friedel_fraction_full     .
_reflns_special_details
;
 Reflections were merged by SHELXL according to the crystal
 class for the calculation of statistics and refinement.
 
 _reflns_Friedel_fraction is defined as the number of unique
 Friedel pairs measured divided by the number that would be
 possible theoretically, ignoring centric projections and
 systematic absences.
;
_computing_data_collection        'Bruker BIS V6.2.15 RC2/2021-02-12 && APEX3 2019.1-0'
_computing_cell_refinement        'SAINT V8.40B (?, 2016)'
_computing_data_reduction         'SAINT V8.40B (?, 2016)'
_computing_structure_solution     'SHELXT 2018/2 (Sheldrick, 2018)'
_computing_structure_refinement   'XL  (Sheldrick, 2008)'
_computing_molecular_graphics     'Olex2 1.3 (Dolomanov et al., 2009)'
_computing_publication_material   'Olex2 1.3 (Dolomanov et al., 2009)'
_refine_special_details           ?
_refine_ls_structure_factor_coef  Fsqd
_refine_ls_matrix_type            full
_refine_ls_weighting_scheme       calc
_refine_ls_weighting_details      'w=1/[\s^2^(Fo^2^)+(0.0255P)^2^+1.0897P] where P=(Fo^2^+2Fc^2^)/3'
_atom_sites_solution_primary      dual
_atom_sites_solution_secondary    ?
_atom_sites_solution_hydrogens    geom
_refine_ls_hydrogen_treatment     constr
_refine_ls_number_reflns          2133
_refine_ls_number_parameters      79
_refine_ls_number_restraints      0
_refine_ls_R_factor_all           0.0238
_refine_ls_R_factor_gt            0.0225
_refine_ls_wR_factor_ref          0.0589
_refine_ls_wR_factor_gt           0.0584
_refine_ls_goodness_of_fit_ref    1.118
_refine_ls_restrained_S_all       1.118
_refine_ls_shift/su_max           0.001
_refine_ls_shift/su_mean          0.000
_refine_diff_density_max          0.921
_refine_diff_density_min          -0.381
_refine_diff_density_rms          0.074
_refine_ls_extinction_method      none
_refine_ls_extinction_coef        .

loop_
_atom_type_symbol
_atom_type_description
_atom_type_scat_dispersion_real
_atom_type_scat_dispersion_imag
_atom_type_scat_source
'C' 'C' 0.0015 0.0010 'International Tables Vol C Tables 4.2.6.8 and 6.1.1.4'
'H' 'H' 0.0000 0.0000 'International Tables Vol C Tables 4.2.6.8 and 6.1.1.4'
'Co' 'Co' 0.3081 0.6370 'International Tables Vol C Tables 4.2.6.8 and 6.1.1.4'
'O' 'O' 0.0061 0.0037 'International Tables Vol C Tables 4.2.6.8 and 6.1.1.4'

_geom_special_details
;
 All esds (except the esd in the dihedral angle between two l.s. planes)
 are estimated using the full covariance matrix.  The cell esds are taken
 into account individually in the estimation of esds in distances, angles
 and torsion angles; correlations between esds in cell parameters are only
 used when they are defined by crystal symmetry.  An approximate (isotropic)
 treatment of cell esds is used for estimating esds involving l.s. planes.
;

loop_
_atom_site_label
_atom_site_type_symbol
_atom_site_fract_x
_atom_site_fract_y
_atom_site_fract_z
_atom_site_U_iso_or_equiv
_atom_site_adp_type
_atom_site_occupancy
_atom_site_site_symmetry_order
_atom_site_calc_flag
_atom_site_refinement_flags_posn
_atom_site_refinement_flags_adp
_atom_site_refinement_flags_occupancy
_atom_site_disorder_assembly
_atom_site_disorder_group
Co1 Co 0.500000 0.61097(2) 0.250000 0.00744(5) Uani 1 2 d S T P . .
O1 O 0.60171(4) 0.52493(9) 0.72545(10) 0.01074(12) Uani 1 1 d . . . . .
O2 O 0.52456(4) 0.66173(8) 0.51402(9) 0.00947(12) Uani 1 1 d . . . . .
O3 O 0.60474(4) 0.80245(9) 0.26544(10) 0.01121(13) Uani 1 1 d . . . . .
C1 C 0.67322(5) 0.69065(10) 0.54103(12) 0.00809(14) Uani 1 1 d . . . . .
C2 C 0.67697(5) 0.77740(10) 0.38018(12) 0.00839(14) Uani 1 1 d . . . . .
C4 C 0.59436(5) 0.62127(10) 0.59639(12) 0.00826(14) Uani 1 1 d . . . . .
C3 C 0.75368(5) 0.83549(11) 0.34216(13) 0.00914(14) Uani 1 1 d . . . . .
H3 H 0.756398 0.894597 0.233704 0.011 Uiso 1 1 calc R U . . .
C5 C 0.61164(7) 0.89288(15) 0.10365(17) 0.0215(2) Uani 1 1 d . . . . .
H5A H 0.649021 0.840157 0.027163 0.032 Uiso 1 1 calc R U . . .
H5B H 0.634240 0.995706 0.138642 0.032 Uiso 1 1 calc R U . . .
H5C H 0.556381 0.904534 0.034626 0.032 Uiso 1 1 calc R U . . .

loop_
_atom_site_aniso_label
_atom_site_aniso_U_11
_atom_site_aniso_U_22
_atom_site_aniso_U_33
_atom_site_aniso_U_23
_atom_site_aniso_U_13
_atom_site_aniso_U_12
Co1 0.00448(7) 0.01072(8) 0.00697(8) 0.000 -0.00002(5) 0.000
O1 0.0078(3) 0.0133(3) 0.0109(3) 0.0029(2) -0.0002(2) -0.0020(2)
O2 0.0059(2) 0.0130(3) 0.0093(3) -0.0007(2) -0.0003(2) 0.0005(2)
O3 0.0068(3) 0.0137(3) 0.0121(3) 0.0051(2) -0.0033(2) -0.0024(2)
C1 0.0059(3) 0.0092(3) 0.0089(3) 0.0004(3) -0.0003(2) -0.0014(2)
C2 0.0062(3) 0.0091(3) 0.0094(3) 0.0008(3) -0.0014(3) -0.0010(3)
C4 0.0067(3) 0.0095(3) 0.0085(3) -0.0016(3) 0.0005(3) -0.0011(3)
C3 0.0067(3) 0.0112(4) 0.0092(3) 0.0015(3) -0.0006(3) -0.0017(3)
C5 0.0149(4) 0.0268(5) 0.0205(5) 0.0149(4) -0.0074(4) -0.0084(4)

loop_
_geom_bond_atom_site_label_1
_geom_bond_atom_site_label_2
_geom_bond_distance
_geom_bond_site_symmetry_2
_geom_bond_publ_flag
Co1 O1 2.0389(7) 5_666 ?
Co1 O1 2.0389(7) 6_565 ?
Co1 O2 1.9834(7) . ?
Co1 O2 1.9834(7) 2_655 ?
Co1 O3 2.3533(7) . ?
Co1 O3 2.3532(7) 2_655 ?
O1 C4 1.2545(11) . ?
O2 C4 1.2658(11) . ?
O3 C2 1.3762(11) . ?
O3 C5 1.4347(13) . ?
C1 C2 1.4041(13) . ?
C1 C4 1.5018(12) . ?
C1 C3 1.3965(12) 7_666 ?
C2 C3 1.3914(12) . ?
C3 H3 0.9500 . ?
C5 H5A 0.9800 . ?
C5 H5B 0.9800 . ?
C5 H5C 0.9800 . ?

loop_
_geom_angle_atom_site_label_1
_geom_angle_atom_site_label_2
_geom_angle_atom_site_label_3
_geom_angle
_geom_angle_site_symmetry_1
_geom_angle_site_symmetry_3
_geom_angle_publ_flag
O1 Co1 O1 110.02(4) 5_666 6_565 ?
O1 Co1 O3 167.84(3) 6_565 2_655 ?
O1 Co1 O3 167.84(3) 5_666 . ?
O1 Co1 O3 79.93(3) 5_666 2_655 ?
O1 Co1 O3 79.93(3) 6_565 . ?
O2 Co1 O1 97.93(3) . 6_565 ?
O2 Co1 O1 96.58(3) 2_655 6_565 ?
O2 Co1 O1 97.93(3) 2_655 5_666 ?
O2 Co1 O1 96.58(3) . 5_666 ?
O2 Co1 O2 154.56(4) . 2_655 ?
O2 Co1 O3 74.63(3) 2_655 2_655 ?
O2 Co1 O3 87.52(3) . 2_655 ?
O2 Co1 O3 87.52(3) 2_655 . ?
O2 Co1 O3 74.63(3) . . ?
O3 Co1 O3 91.15(4) 2_655 . ?
C4 O1 Co1 115.89(6) . 5_666 ?
C4 O2 Co1 118.44(6) . . ?
C2 O3 Co1 118.29(6) . . ?
C2 O3 C5 116.94(8) . . ?
C5 O3 Co1 117.48(6) . . ?
C2 C1 C4 123.81(8) . . ?
C3 C1 C2 119.29(8) 7_666 . ?
C3 C1 C4 116.90(8) 7_666 . ?
O3 C2 C1 119.01(8) . . ?
O3 C2 C3 122.13(8) . . ?
C3 C2 C1 118.86(8) . . ?
O1 C4 O2 123.12(8) . . ?
O1 C4 C1 117.11(8) . . ?
O2 C4 C1 119.76(8) . . ?
C1 C3 H3 119.1 7_666 . ?
C2 C3 C1 121.85(8) . 7_666 ?
C2 C3 H3 119.1 . . ?
O3 C5 H5A 109.5 . . ?
O3 C5 H5B 109.5 . . ?
O3 C5 H5C 109.5 . . ?
H5A C5 H5B 109.5 . . ?
H5A C5 H5C 109.5 . . ?
H5B C5 H5C 109.5 . . ?

loop_
_geom_torsion_atom_site_label_1
_geom_torsion_atom_site_label_2
_geom_torsion_atom_site_label_3
_geom_torsion_atom_site_label_4
_geom_torsion
_geom_torsion_site_symmetry_1
_geom_torsion_site_symmetry_2
_geom_torsion_site_symmetry_3
_geom_torsion_site_symmetry_4
_geom_torsion_publ_flag
Co1 O1 C4 O2 17.09(12) 5_666 . . . ?
Co1 O1 C4 C1 -163.34(6) 5_666 . . . ?
Co1 O2 C4 O1 -116.13(9) . . . . ?
Co1 O2 C4 C1 64.31(10) . . . . ?
Co1 O3 C2 C1 -31.07(11) . . . . ?
Co1 O3 C2 C3 149.04(7) . . . . ?
O3 C2 C3 C1 -179.85(9) . . . 7_666 ?
C1 C2 C3 C1 0.26(15) . . . 7_666 ?
C2 C1 C4 O1 168.07(9) . . . . ?
C2 C1 C4 O2 -12.35(13) . . . . ?
C4 C1 C2 O3 0.46(13) . . . . ?
C4 C1 C2 C3 -179.65(8) . . . . ?
C3 C1 C2 O3 179.85(8) 7_666 . . . ?
C3 C1 C2 C3 -0.25(15) 7_666 . . . ?
C3 C1 C4 O1 -11.34(12) 7_666 . . . ?
C3 C1 C4 O2 168.25(9) 7_666 . . . ?
C5 O3 C2 C1 179.47(9) . . . . ?
C5 O3 C2 C3 -0.42(14) . . . . ?

_shelx_res_file
;
TITL ag_cammiade_ac80_2_0m_a.res in C2/c
    ag_cammiade_ac80_2_0m.res
    created by SHELXL-2018/3 at 12:18:23 on 18-Jul-2021
REM Old TITL ag_Cammiade_AC80_2_0m in C2/c
REM SHELXT solution in C2/c: R1 0.055, Rweak 0.005, Alpha 0.032
REM <I/s> 0.701 for 73 systematic absences, Orientation as input
REM Formula found by SHELXT: C10 O6 Co
REM DISP C 0.0013 0.0009 7.4
REM DISP Co 0.3086 0.634 2061.6
REM DISP H 0 0 0.7
REM DISP O 0.0058 0.0036 18.2
CELL 0.56086 16.1305 8.6024 7.3426 90 96.425 90
ZERR 4 0.0005 0.0003 0.0002 0 0.001 0
LATT 7
SYMM -X,+Y,0.5-Z
SFAC C H Co O
DISP C 0.0015 0.001 7.4358
DISP Co 0.3081 0.637 2061.6237
DISP H -0 0 0.6605
DISP O 0.0061 0.0037 18.1923
UNIT 40 32 4 24

L.S. 50 0 0
PLAN  5
SIZE 0.11 0.14 0.16
TEMP -173(2)
CONF
BOND
list 4
MORE -1
BOND $H
fmap 2 53
acta
OMIT 2 0 0
REM <olex2.extras>
REM <HklSrc "%.\\ag_Cammiade_AC80_2_0m.hkl">
REM </olex2.extras>

WGHT    0.025500    1.089700
FVAR       0.52919
CO1   3    0.500000    0.610971    0.250000    10.50000    0.00448    0.01072 =
         0.00697    0.00000   -0.00002    0.00000
O1    4    0.601708    0.524932    0.725452    11.00000    0.00781    0.01325 =
         0.01086    0.00288   -0.00018   -0.00200
O2    4    0.524562    0.661734    0.514021    11.00000    0.00592    0.01297 =
         0.00925   -0.00069   -0.00031    0.00048
O3    4    0.604742    0.802454    0.265442    11.00000    0.00685    0.01369 =
         0.01211    0.00508   -0.00329   -0.00239
C1    1    0.673220    0.690652    0.541033    11.00000    0.00585    0.00921 =
         0.00895    0.00043   -0.00026   -0.00141
C2    1    0.676969    0.777400    0.380182    11.00000    0.00618    0.00912 =
         0.00935    0.00080   -0.00142   -0.00098
C4    1    0.594359    0.621271    0.596395    11.00000    0.00672    0.00949 =
         0.00848   -0.00157    0.00050   -0.00110
C3    1    0.753677    0.835490    0.342164    11.00000    0.00671    0.01120 =
         0.00917    0.00146   -0.00060   -0.00174
AFIX  43
H3    2    0.756398    0.894597    0.233704    11.00000   -1.20000
AFIX   0
C5    1    0.611643    0.892877    0.103649    11.00000    0.01489    0.02684 =
         0.02054    0.01487   -0.00741   -0.00838
AFIX 137
H5A   2    0.649021    0.840157    0.027163    11.00000   -1.50000
H5B   2    0.634240    0.995706    0.138642    11.00000   -1.50000
H5C   2    0.556381    0.904534    0.034626    11.00000   -1.50000
AFIX   0
HKLF 4


REM  ag_cammiade_ac80_2_0m_a.res in C2/c
REM wR2 = 0.058920, GooF = S = 1.11750, Restrained GooF = 1.11750 for all data
REM R1 = 0.022472 for 2029 Fo > 4sig(Fo) and 0.023817 for all 2133 data
REM 79 parameters refined using 0 restraints

END

WGHT      0.0255      1.0897

REM Highest difference peak  0.921,  deepest hole -0.381,  1-sigma level  0.074
Q1    1   0.5000  0.5330  0.2500  10.50000  0.05    0.92
Q2    1   0.5223  0.6152  0.1778  11.00000  0.05    0.53
Q3    1   0.6727  0.7217  0.4543  11.00000  0.05    0.52
Q4    1   0.6362  0.6603  0.5711  11.00000  0.05    0.51
Q5    1   0.7149  0.8104  0.3658  11.00000  0.05    0.49
;
_shelx_res_checksum               65046
_shelx_hkl_file
;
  -2   0   0   63.99    2.10
  -4   0   0    9.30    1.10
  -4   0   0    7.40    1.30
   4   0   0    9.20    1.20
   4   0   0    9.80    1.50
   4   0   0    9.30    1.10
   4   0   0   10.40    1.60
  -4   0   0   13.80    2.10
  -4   0   0    8.00    1.10
   6   0   0  282.17    9.60
  -6   0   0  279.37    9.00
  -6   0   0  293.27    9.60
  -6   0   0  279.17   10.00
  -6   0   0  289.17    8.80
   6   0   0  276.57    8.90
   6   0   0  283.37    9.60
   6   0   0  303.07    9.20
   8   0   0 4779.82  129.29
  -8   0   0 4965.00  129.29
  -8   0   0 4916.21  130.39
   8   0   0 5026.30  127.89
  10   0   0 5113.19  132.09
 -10   0   0 5101.29  133.79
  10   0   0 5016.80  133.89
 -10   0   0 4998.60  135.29
  10   0   0 5073.49  132.49
  10   0   0 5094.99  134.09
  12   0   0 2710.63   72.69
  12   0   0 2652.63   70.09
 -12   0   0 2609.44   71.19
 -12   0   0 2631.14   72.19
  12   0   0 2583.74   72.09
 -12   0   0 2620.44   74.29
  12   0   0 2615.24   70.69
 -14   0   0  633.94   20.60
 -14   0   0  622.14   23.60
 -14   0   0  645.54   19.70
  14   0   0  631.94   19.20
  14   0   0  666.63   22.10
 -16   0   0  169.58   10.90
 -16   0   0  170.88    8.90
  16   0   0  165.98    7.00
  16   0   0  177.18    9.60
 -16   0   0  161.08    8.20
 -18   0   0  724.83   28.80
  18   0   0  746.83   26.00
  18   0   0  700.23   23.10
 -18   0   0  735.13   24.20
  20   0   0  480.35   16.00
 -20   0   0  474.25   18.30
  20   0   0  498.95   20.10
 -22   0   0  161.58    9.40
  22   0   0  134.59    8.20
 -22   0   0  154.78   13.00
  22   0   0  135.69   10.10
 -24   0   0   28.30    7.40
 -24   0   0   36.30    5.60
   1   1   0 5409.66  250.47
  -1   1   0 5329.37  226.58
   3  -1   0 2636.74   67.79
  -3   1   0 2500.65   67.99
   5  -1   0 1205.78   33.60
  -5  -1   0 1226.88   33.70
   5  -1   0 1234.88   32.60
  -5  -1   0 1187.58   32.60
   5  -1   0 1202.18   32.20
  -5  -1   0 1219.98   33.00
  -5  -1   0 1205.68   32.80
   5  -1   0 1232.28   33.40
  -5   1   0 1203.68   32.50
   5   1   0 1230.08   32.80
  -5   1   0 1171.98   34.00
  -5   1   0 1210.58   33.50
   5   1   0 1192.48   33.30
   5   1   0 1223.68   32.90
  -5   1   0 1201.58   32.30
   5   1   0 1183.78   32.50
   7  -1   0  611.14   17.70
  -7  -1   0  630.94   18.70
  -7  -1   0  612.34   18.30
   7  -1   0  641.54   17.10
   7  -1   0  623.24   18.90
   7  -1   0  638.14   19.40
  -7   1   0  611.34   17.90
   7   1   0  622.34   19.00
  -7   1   0  622.64   19.00
   7   1   0  639.74   18.70
  -7   1   0  601.64   17.60
   7   1   0  630.84   18.20
  -9  -1   0 1439.16   39.70
  -9  -1   0 1408.76   40.10
   9  -1   0 1420.26   40.40
  -9  -1   0 1439.46   39.60
   9  -1   0 1415.26   41.00
   9  -1   0 1481.65   38.60
   9  -1   0 1435.06   39.00
  -9  -1   0 1462.65   41.50
   9   1   0 1448.76   40.10
  -9   1   0 1400.36   40.50
  -9   1   0 1436.06   42.10
  -9   1   0 1430.46   39.30
   9   1   0 1412.86   39.30
   9   1   0 1427.76   40.50
   9   1   0 1415.36   39.30
 -11  -1   0 1493.35   42.00
  11  -1   0 1437.96   41.00
  11  -1   0 1501.55   43.60
 -11  -1   0 1506.05   44.30
 -11  -1   0 1529.15   42.70
 -11  -1   0 1501.65   41.70
  11  -1   0 1532.15   40.30
 -11   1   0 1474.15   41.50
  11   1   0 1445.86   41.40
 -11   1   0 1482.95   43.00
  11   1   0 1494.35   43.00
 -11   1   0 1516.95   45.00
  11   1   0 1497.25   42.60
  11   1   0 1543.65   41.40
 -13  -1   0  632.44   20.50
  13  -1   0  635.64   21.50
  13  -1   0  620.24   17.80
 -13  -1   0  625.64   19.40
 -13  -1   0  617.44   22.30
 -13  -1   0  607.24   19.70
  13  -1   0  608.44   18.80
  13  -1   0  519.75   19.70
  13   1   0  615.24   18.80
  13   1   0  615.24   20.50
 -13   1   0  602.04   19.30
 -13   1   0  623.14   23.00
 -15  -1   0   20.90    4.60
  15  -1   0   43.80    6.30
 -15  -1   0   33.80    4.30
 -15  -1   0   26.20    3.50
  15  -1   0   29.90    2.50
  15   1   0   32.60    4.70
 -15   1   0   30.90    3.70
  15   1   0   32.00    3.00
 -15   1   0   37.10    4.70
 -15   1   0   27.60    5.60
 -17  -1   0   67.59    7.10
 -17  -1   0   64.89    5.60
 -17  -1   0   71.39    5.50
  17  -1   0   68.19    6.60
  17  -1   0   69.09    3.80
 -17  -1   0   64.99    4.90
  17   1   0   63.29    5.80
  17   1   0   65.89    4.40
 -17   1   0   57.09    7.00
 -17   1   0   67.09    5.20
  19  -1   0  159.98    6.60
 -19  -1   0  155.28    8.80
  19  -1   0  165.48   10.70
 -19  -1   0  132.49   10.90
 -19   1   0  157.08   12.10
  19   1   0  161.38    9.70
 -19   1   0  158.88    8.60
 -21  -1   0  351.86   19.40
 -21  -1   0  342.37   15.00
  21  -1   0  339.47   11.90
  21  -1   0  382.26   17.70
  21   1   0  358.56   16.30
 -21   1   0  335.97   19.60
 -21   1   0  386.26   21.10
 -23  -1   0  155.68    9.70
 -23  -1   0  165.18   13.60
 -23   1   0  134.99    9.00
  23   1   0  131.99    9.90
 -23   1   0  148.49   13.50
 -25  -1   0   17.50    6.70
 -25  -1   0    9.90    3.50
 -25   1   0   24.40    8.20
 -25   1   0   18.30    4.20
  25   1   0   13.20    4.90
   0  -2   0 1258.27   33.90
   0  -2   0 1285.17   34.80
   0  -2   0 1243.78   35.30
   0   2   0 1260.47   34.70
   0   2   0 1292.27   33.90
   0   2   0 1305.07   37.50
  -2  -2   0  851.51   23.30
   2  -2   0  866.91   23.20
  -2  -2   0  876.31   27.90
  -2  -2   0  891.61   24.80
   2  -2   0  843.92   24.50
  -2  -2   0  881.81   25.30
   2  -2   0  877.31   25.00
   2  -2   0  871.11   25.50
   2  -2   0  871.91   22.80
  -2  -2   0  881.21   24.10
  -2   2   0  861.91   25.30
  -2   2   0  862.71   26.00
  -2   2   0  864.21   23.10
   2   2   0  885.31   23.30
   2   2   0  862.91   28.10
  -2   2   0  873.61   24.40
   4  -2   0   68.49    4.00
  -4  -2   0   63.69    6.10
  -4  -2   0   68.59    3.20
   4  -2   0   77.89    4.10
  -4  -2   0   66.39    3.60
  -4  -2   0   73.09    4.00
   4  -2   0   69.09    2.70
   4   2   0   72.89    3.90
   4   2   0   80.19    4.60
  -4   2   0   71.29    2.70
   4   2   0   70.99    3.80
  -4   2   0   73.29    4.00
   4   2   0   71.29    3.50
   4   2   0   68.29    3.00
  -4   2   0   68.09    4.50
  -4   2   0   80.19    4.00
   6  -2   0  495.85   13.90
   6  -2   0  494.75   15.30
  -6  -2   0  487.75   15.10
  -6  -2   0  470.95   16.80
   6  -2   0  505.05   16.40
   6  -2   0  483.35   15.70
  -6  -2   0  499.55   15.30
  -6  -2   0  483.05   15.10
   6   2   0  472.65   14.90
   6   2   0  484.85   14.40
   6   2   0  486.95   15.70
  -6   2   0  482.55   15.00
  -6   2   0  497.65   15.70
   6   2   0  475.95   14.80
  -6   2   0  466.15   16.70
  -6   2   0  478.65   14.00
   6   2   0  502.45   15.50
  -8  -2   0  280.87   10.30
  -8  -2   0  293.27   10.40
   8  -2   0  270.17   10.00
   8  -2   0  275.67   10.60
   8  -2   0  280.07    9.10
   8  -2   0  290.07   11.50
  -8  -2   0  287.77    9.90
  -8  -2   0  288.97   11.30
   8   2   0  270.47    9.80
   8   2   0  276.67   10.00
  -8   2   0  278.07    9.70
   8   2   0  289.17    9.60
  -8   2   0  285.97   10.90
   8   2   0  285.47   10.80
  -8   2   0  285.77   12.10
   8   2   0  299.07   10.30
  -8   2   0  280.47    9.20
  10  -2   0  192.78    8.40
  10  -2   0  198.18    9.60
 -10  -2   0  193.08    8.00
 -10  -2   0  189.78    9.30
  10  -2   0  196.58    7.80
  10  -2   0  179.58    7.00
 -10  -2   0  201.58    8.30
 -10  -2   0  186.58    8.10
  10   2   0  193.38    9.50
 -10   2   0  193.98    7.40
 -10   2   0  201.28   10.30
 -10   2   0  192.78    7.50
  10   2   0  207.88    8.30
 -10   2   0  188.48    8.70
  10   2   0  193.68    7.80
  12  -2   0   26.40    2.70
  12  -2   0   26.90    2.40
  12  -2   0   24.80    3.00
 -12  -2   0   26.20    3.70
  12  -2   0   23.30    4.20
 -12  -2   0   33.80    4.40
 -12  -2   0   24.60    3.40
 -12  -2   0   29.00    5.20
 -12   2   0   23.10    2.40
  12   2   0   25.80    4.20
 -12   2   0   32.80    4.70
 -12   2   0   23.90    2.60
  12   2   0   19.30    2.30
 -12   2   0   22.30    4.60
  12   2   0   22.70    3.40
  12   2   0   27.70    2.70
  14  -2   0  313.27   11.70
 -14  -2   0  326.77   13.00
 -14  -2   0  358.86   15.70
 -14  -2   0  349.87   13.60
 -14  -2   0  351.36   13.30
  14  -2   0  364.26   15.40
  14   2   0  352.16   12.60
  14   2   0  374.56   13.70
 -14   2   0  334.77   16.40
 -14   2   0  365.46   12.70
 -14   2   0  326.87   13.80
  16  -2   0    3.90    3.20
 -16  -2   0    4.00    3.10
 -16  -2   0    3.00    1.80
 -16  -2   0    1.90    2.20
 -16  -2   0    1.70    1.80
 -16   2   0    5.80    3.40
  16   2   0    2.30    2.00
  16   2   0    2.20    1.50
 -16   2   0    2.60    1.80
 -18  -2   0   21.20    4.10
  18  -2   0   16.50    4.40
 -18  -2   0    8.60    2.60
 -18  -2   0   11.60    4.50
 -18  -2   0    8.80    3.20
 -18   2   0   11.50    4.70
 -18   2   0   17.40    3.60
  18   2   0   17.60    3.80
 -20  -2   0  233.18   14.60
 -20  -2   0  220.68   10.70
 -20  -2   0  225.48   11.70
  20   2   0  213.98   11.40
 -20   2   0  231.18   15.80
 -20   2   0  215.28   10.70
 -22  -2   0   17.60    4.00
 -22  -2   0   16.80    5.70
 -22   2   0   20.60    7.50
 -22   2   0   15.80    3.60
  22   2   0   21.50    4.60
 -24  -2   0   -1.80    2.30
 -24  -2   0    0.50    3.80
 -24   2   0    1.40    2.40
 -24   2   0    3.40    4.80
  24   2   0   -0.80    2.60
  -1  -3   0  406.66   13.30
   1  -3   0  383.36   14.90
  -1  -3   0  400.56   14.10
   1  -3   0  387.56   13.90
  -1  -3   0  399.56   11.30
  -1  -3   0  386.66   12.30
   1  -3   0  408.06   12.00
  -1  -3   0  403.86   16.10
   1  -3   0  394.66   13.20
   1   3   0  384.06   16.80
  -1   3   0  403.86   11.80
  -1   3   0  394.56   13.50
  -1   3   0  414.96   13.20
   1   3   0  397.06   12.10
   1   3   0  397.46   13.50
   3  -3   0 2767.12   72.39
   3  -3   0 2716.53   70.19
  -3  -3   0 2651.53   71.59
   3  -3   0 2670.53   72.99
   3  -3   0 2689.13   73.49
  -3  -3   0 2672.83   73.69
  -3  -3   0 2581.04   76.89
   3   3   0 2706.33   72.59
  -3   3   0 2743.83   74.99
   3   3   0 2685.63   72.39
  -3   3   0 2655.23   71.99
   3   3   0 2657.53   71.29
   3   3   0 2732.93   78.29
  -3   3   0 2718.23   72.59
   5  -3   0 5230.28  139.49
   5  -3   0 5358.56  139.29
  -5  -3   0 5217.18  144.99
   5   3   0 5363.46  138.89
  -5   3   0 5319.97  141.39
   5   3   0 5070.99  137.69
  -5   3   0 5253.17  138.69
   5   3   0 5322.27  138.39
  -5   3   0 5282.27  138.89
   7  -3   0  782.72   21.80
   7  -3   0  786.82   24.60
   7  -3   0  807.62   24.50
  -7  -3   0  778.02   30.30
  -7  -3   0  789.92   23.80
  -7  -3   0  779.52   22.90
  -7  -3   0  789.52   24.80
   7   3   0  791.02   23.40
  -7   3   0  803.12   26.40
   7   3   0  789.92   23.50
   7   3   0  786.92   23.90
   7   3   0  788.02   22.60
  -7   3   0  767.12   24.20
  -7   3   0  771.62   23.70
  -7   3   0  809.82   22.00
   7   3   0  771.52   24.30
  -9  -3   0   20.30    3.10
  -9  -3   0   23.70    2.60
   9  -3   0   22.40    1.90
  -9  -3   0   30.30    4.80
   9  -3   0   22.30    2.80
   9  -3   0   26.00    3.10
  -9   3   0   23.70    2.60
   9   3   0   23.70    2.50
  -9   3   0   20.60    2.30
   9   3   0   24.60    2.80
  -9   3   0   29.20    5.10
  -9   3   0   23.70    3.70
   9   3   0   27.80    3.60
   9   3   0   22.40    2.10
   9   3   0   19.40    3.40
 -11  -3   0   32.00    5.40
  11  -3   0   22.20    2.10
  11  -3   0   30.70    3.40
 -11  -3   0   29.60    4.00
  11  -3   0   22.10    3.60
 -11  -3   0   29.10    3.10
 -11  -3   0   27.10    3.80
  11   3   0   20.70    2.30
 -11   3   0   21.10    3.40
 -11   3   0   25.40    2.40
 -11   3   0   22.80    4.70
  11   3   0   24.20    2.70
  11   3   0   20.20    3.60
 -11   3   0   24.20    2.70
  11   3   0   24.10    2.90
  11   3   0   24.10    3.10
  13  -3   0  600.14   18.20
  13  -3   0  611.34   19.80
 -13  -3   0  587.54   20.20
 -13  -3   0  580.24   20.10
 -13  -3   0  601.14   22.30
 -13  -3   0  613.34   19.90
 -13   3   0  601.54   18.90
 -13   3   0  593.04   23.90
  13   3   0  606.54   19.90
  13   3   0  589.14   18.80
  13   3   0  541.45   19.10
 -13   3   0  609.74   18.80
 -15  -3   0  156.98    8.40
 -15  -3   0  143.99    8.00
 -15  -3   0  136.99    7.70
 -15  -3   0  145.59    9.70
 -15   3   0  146.09    7.20
 -15   3   0  153.88    7.00
  15   3   0  143.29    7.70
 -15   3   0  136.49   10.70
 -17  -3   0   17.10    3.90
 -17  -3   0   17.90    3.60
 -17  -3   0   13.50    4.50
 -17  -3   0   11.30    3.20
  17   3   0   16.30    3.50
 -17   3   0    9.10    2.40
 -17   3   0    1.90    3.20
 -19  -3   0   99.79    7.30
 -19  -3   0  125.39   12.10
  19   3   0  103.39    7.40
 -19   3   0   90.39    6.40
 -19   3   0  109.19   11.10
 -21  -3   0    5.10    3.00
 -21  -3   0    1.50    2.80
 -21  -3   0    7.70    3.10
  21   3   0    5.20    2.80
 -21   3   0   -0.70    4.00
 -21   3   0    5.80    2.60
 -23  -3   0  112.79    8.80
 -23  -3   0  121.69    8.60
 -23  -3   0  114.59   11.40
  23   3   0  130.89    8.90
 -23   3   0  122.89   12.80
 -23   3   0  122.99    8.10
   0  -4   0 2566.34   71.49
   0  -4   0 2558.24   69.89
   0  -4   0 2509.55   73.29
   0  -4   0 2560.74   68.29
   0   4   0 2615.34   67.99
   0   4   0 2702.13   80.29
   0   4   0 2404.56   70.09
   2  -4   0 2452.15   67.79
  -2  -4   0 2361.86   71.09
   2  -4   0 2429.66   64.29
  -2  -4   0 2431.56   68.39
  -2  -4   0 2494.85   66.79
   2  -4   0 2346.27   68.39
  -2  -4   0 2451.95   63.69
   2  -4   0 2346.57   66.29
  -2  -4   0 2428.86   66.49
   2   4   0 2409.46   64.89
  -2   4   0 2432.66   63.99
  -2   4   0 2337.17   66.69
   2   4   0 2393.06   66.79
  -2   4   0 2505.65   71.59
   2   4   0 2357.96   66.29
   2   4   0 2595.84   78.29
  -2   4   0 2453.35   66.29
  -4  -4   0 3180.08   84.99
  -4  -4   0 3245.08   86.39
   4  -4   0 3092.69   86.99
   4  -4   0 3156.28   86.89
   4  -4   0 3160.68   82.99
   4  -4   0 3168.68   85.89
  -4   4   0 3158.08   85.29
  -4   4   0 3187.48   82.79
  -4   4   0 3395.16   90.19
  -4   4   0 3161.08   85.99
   4   4   0 3086.09   85.69
   4   4   0 3133.89   84.49
   4   4   0 3126.79   86.09
  -6  -4   0  599.84   25.00
   6  -4   0  584.54   19.90
  -6  -4   0  548.25   18.40
   6  -4   0  576.54   19.20
   6  -4   0  563.04   19.60
   6  -4   0  550.54   15.80
  -6  -4   0  579.04   19.60
  -6  -4   0  572.04   17.30
   6   4   0  552.54   18.90
  -6   4   0  571.14   19.00
  -6   4   0  580.44   19.20
   6   4   0  567.44   19.00
   6   4   0  576.44   18.70
   6   4   0  553.14   17.90
  -6   4   0  556.54   21.70
   6   4   0  564.34   16.90
  -8  -4   0 2044.30   54.69
   8  -4   0 1972.80   56.89
  -8  -4   0 2021.10   57.29
  -8  -4   0 1975.90   55.99
   8  -4   0 1972.70   58.59
  -8  -4   0 2020.60   64.89
   8  -4   0 2071.89   56.79
   8  -4   0 2017.30   52.99
   8   4   0 1976.00   58.09
   8   4   0 1985.40   56.09
  -8   4   0 2018.30   55.99
  -8   4   0 2039.30   53.19
  -8   4   0 1970.20   59.79
   8   4   0 1933.41   53.99
   8   4   0 1974.40   55.49
 -10  -4   0  477.05   17.20
  10  -4   0  504.65   17.70
  10  -4   0  494.45   14.60
 -10  -4   0  447.66   24.70
 -10  -4   0  476.85   18.40
  10  -4   0  519.85   18.00
 -10  -4   0  478.55   16.20
  10  -4   0  460.65   17.40
 -10   4   0  509.45   20.80
 -10   4   0  475.85   16.70
 -10   4   0  459.45   17.30
  10   4   0  509.75   17.00
  10   4   0  428.76   17.10
 -10   4   0  516.75   15.00
  10   4   0  479.65   15.50
 -12  -4   0  550.54   27.70
  12  -4   0  573.24   17.20
 -12  -4   0  552.14   19.90
 -12  -4   0  558.24   18.90
 -12  -4   0  571.54   21.60
  12  -4   0  586.04   20.20
  12   4   0  576.44   19.10
  12   4   0  580.84   19.10
 -12   4   0  560.74   19.00
 -12   4   0  589.24   17.70
 -12   4   0  543.05   23.40
 -14  -4   0  488.75   18.10
  14  -4   0  545.25   19.00
  14  -4   0  494.85   16.20
 -14  -4   0  504.95   20.90
 -14  -4   0  527.05   19.20
  14   4   0  524.15   18.20
 -14   4   0  512.75   23.20
 -14   4   0  512.95   17.80
 -14   4   0  542.35   16.90
  14   4   0  522.45   17.60
  16  -4   0  298.97   12.70
 -16  -4   0  280.87   13.10
 -16  -4   0  300.27   15.40
 -16   4   0  295.77   11.30
  16   4   0  280.77   12.20
 -16   4   0  283.37   17.00
 -16   4   0  294.47   11.70
 -18  -4   0   50.19    5.30
 -18  -4   0   50.39    5.50
 -18  -4   0   59.89    9.40
 -18   4   0   48.20    8.80
  18   4   0   53.69    5.30
 -18   4   0   54.99    4.60
 -20  -4   0  314.67   17.60
 -20  -4   0  297.37   14.10
 -20  -4   0  302.17   14.30
 -20   4   0  329.07   19.90
 -20   4   0  295.77   12.60
  20   4   0  308.27   13.70
 -22  -4   0   68.19    8.90
 -22  -4   0   53.09    6.20
 -22  -4   0   72.89   12.40
  22   4   0   68.09    6.40
 -22   4   0   78.19   13.50
 -24  -4   0  250.77   13.10
 -24  -4   0  210.18   16.00
 -24  -4   0  246.58   13.40
 -24   4   0  228.18   11.60
  24   4   0  232.78   12.30
 -24   4   0  244.68   19.10
   1  -5   0  911.51   27.70
  -1  -5   0  941.31   30.70
   1  -5   0  911.01   30.20
  -1  -5   0  871.71   32.40
  -1  -5   0  930.01   27.10
  -1  -5   0  915.81   28.70
   1  -5   0  874.31   31.20
  -1  -5   0  929.51   25.10
   1   5   0  910.71   29.00
  -1   5   0  878.51   28.70
   1   5   0  913.41   35.30
   1   5   0  904.91   28.30
   1   5   0  948.81   26.60
  -1   5   0  950.80   34.80
  -1   5   0  931.81   26.10
  -1   5   0  885.11   28.10
   3  -5   0  873.11   28.30
  -3  -5   0  823.02   25.30
   3  -5   0  840.92   24.00
  -3  -5   0  801.62   28.60
  -3  -5   0  851.61   24.20
  -3  -5   0  798.52   31.20
   3  -5   0  801.72   26.50
  -3  -5   0  828.52   26.80
   3  -5   0  843.62   28.40
   3   5   0  828.72   26.80
  -3   5   0  789.92   26.50
  -3   5   0  832.42   26.10
   3   5   0  829.72   24.70
   3   5   0  825.32   33.70
  -3   5   0  836.22   23.50
  -3   5   0  886.81   32.20
   5  -5   0  488.65   19.00
   5  -5   0  504.95   15.20
   5  -5   0  514.55   18.20
  -5  -5   0  512.95   18.60
  -5  -5   0  507.85   15.70
   5  -5   0  519.75   14.30
  -5  -5   0  500.95   23.30
   5  -5   0  526.85   19.50
  -5  -5   0  525.55   17.50
  -5   5   0  495.75   18.00
   5   5   0  521.05   25.50
   5   5   0  508.45   18.30
  -5   5   0  517.05   22.30
  -5   5   0  509.45   18.30
  -5   5   0  518.55   14.90
   5   5   0  483.85   16.80
  -7  -5   0  546.25   20.10
  -7  -5   0  559.44   19.00
   7  -5   0  557.74   15.60
  -7  -5   0  550.04   17.30
   7  -5   0  524.65   20.30
  -7  -5   0  530.15   29.80
   7  -5   0  516.85   19.70
   7  -5   0  569.24   21.40
  -7   5   0  543.55   19.20
  -7   5   0  563.94   23.30
   7   5   0  529.65   19.30
   7   5   0  534.25   18.00
   7   5   0  569.34   19.50
   7   5   0  553.54   19.20
  -7   5   0  572.44   19.50
   9  -5   0  884.71   30.10
   9  -5   0  863.71   28.70
   9  -5   0  873.71   23.70
  -9  -5   0  844.02   28.60
  -9  -5   0  847.72   25.70
  -9  -5   0  875.41   27.50
   9  -5   0  762.62   27.50
  -9  -5   0  820.42   35.10
  -9   5   0  841.62   27.20
   9   5   0  856.21   27.50
  -9   5   0  787.42   33.40
  -9   5   0  897.41   32.30
   9   5   0  884.71   26.90
   9   5   0  820.92   24.90
   9   5   0  859.41   27.40
  11  -5   0  860.21   28.50
  11  -5   0  852.81   24.10
  11  -5   0  877.51   28.90
 -11  -5   0  863.61   29.50
 -11  -5   0  825.02   27.70
 -11  -5   0  851.51   26.30
 -11  -5   0  727.93   34.90
  11   5   0  848.32   27.30
 -11   5   0  835.72   32.20
 -11   5   0  846.82   27.10
  11   5   0  857.31   26.80
 -11   5   0  873.61   24.40
  13  -5   0  561.24   21.00
  13  -5   0  552.74   20.90
 -13  -5   0  547.65   20.50
  13  -5   0  548.85   17.80
 -13  -5   0  564.84   19.20
 -13  -5   0  552.54   22.10
  13   5   0  572.94   19.30
 -13   5   0  549.25   24.90
 -13   5   0  574.24   17.40
 -13   5   0  496.95   20.50
  13   5   0  542.45   19.30
 -15  -5   0  434.36   17.70
  15  -5   0  401.06   14.00
  15  -5   0  455.05   18.00
 -15  -5   0  408.56   16.40
  15  -5   0  433.36   18.00
 -15  -5   0  444.86   19.70
 -15   5   0  464.35   22.70
 -15   5   0  459.85   14.90
  15   5   0  422.96   16.10
  15   5   0  440.06   16.30
 -17  -5   0  171.38   10.30
 -17  -5   0  164.58   11.60
 -17  -5   0  162.08    9.30
  17  -5   0  180.68   10.30
  17  -5   0  172.38   10.50
  17   5   0  156.98    8.20
 -17   5   0  164.88    8.00
  17   5   0  176.98    9.30
 -17   5   0  172.98   14.00
 -19  -5   0  331.57   18.10
  19  -5   0  342.07   16.20
 -19  -5   0  342.07   15.80
 -19  -5   0  331.87   15.00
  19   5   0  340.87   14.40
 -19   5   0  348.77   21.10
 -19   5   0  333.87   13.20
  21  -5   0  478.45   20.70
 -21  -5   0  477.35   20.10
 -21  -5   0  477.55   23.50
 -21  -5   0  442.56   19.20
 -21   5   0  499.95   27.00
 -21   5   0  477.85   17.60
  21   5   0  509.15   18.90
 -23  -5   0  270.97   14.50
 -23  -5   0  287.47   18.20
  23  -5   0  283.07   15.20
  23   5   0  299.07   13.60
 -23   5   0  266.37   12.40
 -23   5   0  291.27   20.90
   0  -6   0  207.68   12.80
   0  -6   0  228.58    9.30
   0  -6   0  237.48   12.70
   0  -6   0  218.68   10.60
   0   6   0  228.08   10.40
   0   6   0  225.58   16.00
   0   6   0  203.08   10.50
   0   6   0  216.88    8.50
   2  -6   0  114.09    5.80
  -2  -6   0  111.59    6.30
   2  -6   0  112.49    7.20
  -2  -6   0  106.89    8.70
  -2  -6   0  118.89    7.50
  -2  -6   0  130.69   10.20
   2  -6   0  107.69    8.30
   2  -6   0  125.09    8.80
  -2   6   0  108.59    5.20
  -2   6   0  105.09    7.10
   2   6   0  110.49    5.80
   2   6   0  118.29    7.10
   2   6   0  128.69   12.40
  -2   6   0  123.19    7.10
   2   6   0  108.99    7.20
  -2   6   0  104.99   10.70
   4  -6   0   31.50    4.00
  -4  -6   0   31.50    2.60
  -4  -6   0   38.60    9.00
   4  -6   0   33.70    5.90
   4  -6   0   28.10    5.30
   4  -6   0   28.50    3.10
  -4  -6   0   42.20    6.30
  -4  -6   0   44.60    5.50
   4  -6   0   30.30    1.80
   4   6   0   31.30    3.60
  -4   6   0   31.80    3.50
  -4   6   0   30.10    2.40
  -4   6   0   35.90    5.50
   4   6   0   48.60   10.70
  -4   6   0   35.10    7.10
   4   6   0   36.10    5.60
   4   6   0   28.80    3.00
   6  -6   0  339.97    9.80
   6  -6   0  292.57   14.10
  -6  -6   0  338.07   11.50
  -6  -6   0  323.07   13.30
   6  -6   0  343.47   15.70
   6  -6   0  344.77   10.90
  -6  -6   0  307.57   18.60
   6  -6   0  341.97   14.20
   6   6   0  319.67   13.70
   6   6   0  345.37   21.80
  -6   6   0  289.87   13.20
   6   6   0  298.77   12.10
  -6   6   0  325.17   10.30
  -6   6   0  333.07   14.00
  -6   6   0  327.77   18.50
   6   6   0  317.87   13.90
  -8  -6   0    2.20    1.50
  -8  -6   0    2.40    2.30
  -8  -6   0    4.40    4.40
  -8  -6   0    0.40    1.60
   8  -6   0    2.30    2.80
   8  -6   0    2.80    1.20
   8  -6   0    1.90    0.80
   8  -6   0    3.10    2.30
   8   6   0    1.70    2.20
  -8   6   0    0.70    1.90
   8   6   0    3.00    2.00
  -8   6   0    1.60    3.40
  10  -6   0  198.68    6.90
 -10  -6   0  192.68   11.20
  10  -6   0  199.28   11.60
  10  -6   0  186.38   10.40
 -10  -6   0  192.98    8.80
 -10  -6   0  183.18   10.10
 -10   6   0  178.58    9.70
 -10   6   0  177.58   13.40
  10   6   0  202.28    9.90
  10   6   0  203.58   10.30
 -12  -6   0   45.20    6.50
  12  -6   0   41.70    6.70
 -12  -6   0   42.50    4.30
 -12  -6   0   45.60    6.00
  12  -6   0   40.80    6.20
  12  -6   0   41.70    2.90
  12   6   0   42.10    4.90
 -12   6   0   38.80    4.50
 -12   6   0   33.80    7.60
  12   6   0   39.70    4.60
 -14  -6   0  502.65   21.50
 -14  -6   0  450.65   19.10
  14  -6   0  493.45   20.00
 -14  -6   0  486.15   17.90
  14  -6   0  480.25   15.20
  14  -6   0  494.75   20.30
  14   6   0  479.15   18.20
 -14   6   0  443.36   17.90
 -14   6   0  462.75   24.20
  14   6   0  510.85   18.10
 -14   6   0  488.05   15.60
 -16  -6   0  170.08    9.60
  16  -6   0  183.58   11.20
  16  -6   0  178.08   11.00
 -16  -6   0  163.78   10.50
 -16  -6   0  182.68   12.20
 -16   6   0  159.38   13.90
  16   6   0  178.08    9.20
 -16   6   0  176.48    7.70
 -16   6   0  151.18   10.10
  16   6   0  162.28    9.10
  18  -6   0  245.18   13.70
  18  -6   0  258.97   13.90
 -18  -6   0  242.78   15.20
  18   6   0  253.47   11.80
  18   6   0  223.58   10.90
 -18   6   0  235.38   17.80
 -18   6   0  263.87   10.50
 -20  -6   0   27.50    6.50
 -20  -6   0   39.30    6.70
 -20  -6   0   29.70    5.30
  20  -6   0   39.60    6.90
 -20   6   0   51.09    4.60
 -20   6   0   58.99   11.80
  20   6   0   52.19    5.30
 -22  -6   0  236.28   13.00
 -22  -6   0  233.88   13.60
 -22  -6   0  242.98   16.60
  22  -6   0  225.78   13.70
 -22   6   0  235.38   10.80
  22   6   0  230.48   11.50
 -22   6   0  216.38   18.60
  -1  -7   0  684.83   19.50
  -1  -7   0  693.93   22.20
  -1  -7   0  617.44   26.50
   1  -7   0  654.53   23.90
  -1  -7   0  667.63   24.10
   1  -7   0  675.33   21.50
   1  -7   0  676.23   26.90
   1   7   0  669.53   21.10
   1   7   0  679.13   32.70
  -1   7   0  723.43   32.80
   1   7   0  635.94   23.30
  -1   7   0  678.63   21.80
  -1   7   0  654.23   23.40
  -3  -7   0    6.30    3.30
   3  -7   0    7.70    2.20
  -3  -7   0    9.50    2.90
   3  -7   0    9.10    3.00
  -3  -7   0   11.60    2.00
   3  -7   0    5.70    3.50
   3   7   0    6.00    1.90
   3   7   0    5.90    5.10
  -3   7   0   14.40    6.60
  -3   7   0   10.40    2.00
   3   7   0    6.20    2.30
  -5  -7   0   11.60    2.20
  -5  -7   0   14.10    3.80
   5  -7   0   11.60    1.50
   5  -7   0    9.90    2.20
   5  -7   0   11.60    3.70
   5  -7   0    7.60    4.10
  -5  -7   0    9.30    3.20
   5   7   0   14.50    6.70
  -5   7   0   11.90    2.00
  -5   7   0    6.60    6.10
  -7  -7   0   10.00    2.30
  -7  -7   0   10.20    3.30
  -7  -7   0   10.70    3.10
   7  -7   0   10.10    3.40
   7  -7   0    7.90    1.20
   7  -7   0   10.90    4.50
  -7   7   0   15.90    6.20
  -9  -7   0  191.98   11.70
  -9  -7   0  208.28    9.10
   9  -7   0  195.48   12.60
   9  -7   0  213.68   11.40
  -9  -7   0  193.98   10.70
   9  -7   0  194.18    6.80
   9   7   0  202.48   10.80
  -9   7   0  178.28   14.80
 -11  -7   0  207.48   12.40
  11  -7   0  193.58   11.10
 -11  -7   0  191.68    9.20
  11  -7   0  183.18   12.30
  11  -7   0  191.18    6.90
 -11  -7   0  187.28   10.80
 -11   7   0  190.48   15.50
  11   7   0  190.98   10.20
 -13  -7   0    8.80    3.90
 -13  -7   0   18.80    3.40
  13  -7   0   17.80    4.80
  13  -7   0   12.80    4.50
  13  -7   0   16.00    2.20
 -13  -7   0    9.30    3.30
 -13   7   0   12.10    6.20
  13   7   0   12.10    3.90
 -15  -7   0  105.39   10.20
 -15  -7   0  112.59    7.70
 -15  -7   0  114.79    8.90
  15  -7   0  132.89   10.50
  15  -7   0  107.89    5.30
  15  -7   0  118.59    9.00
 -15   7   0  126.59   19.70
  15   7   0  120.59    7.80
 -17  -7   0    2.10    2.90
 -17  -7   0   -0.40    2.10
 -17  -7   0    2.80    4.50
  17  -7   0   -2.20    3.40
  17  -7   0   -0.60    2.70
  17   7   0    2.50    2.60
 -17   7   0    2.30    5.00
 -19  -7   0    3.10    2.70
 -19  -7   0   11.90    5.50
  19  -7   0   11.00    4.30
 -19  -7   0   12.30    4.20
  19   7   0   11.10    3.40
 -19   7   0   13.60    3.00
 -19   7   0    5.30    5.50
  21  -7   0   19.50    5.50
 -21  -7   0   35.90    8.30
 -21  -7   0   34.40    6.10
 -21  -7   0   34.20    6.60
 -21   7   0   22.60    8.10
 -21   7   0   34.00    4.40
  21   7   0   42.30    5.20
   0  -8   0  214.98   11.60
   0  -8   0  180.78    6.80
   0  -8   0  187.48    9.20
   0  -8   0  151.38   12.50
   0   8   0  212.88   18.20
   0   8   0  160.88    7.90
   2  -8   0  515.65   20.40
  -2  -8   0  531.25   18.80
   2  -8   0  514.75   23.70
  -2  -8   0  517.15   20.70
   2  -8   0  496.25   17.50
  -2  -8   0  510.15   15.60
   2   8   0  485.35   29.10
  -2   8   0  480.45   28.00
  -2   8   0  503.05   16.60
  -2   8   0  456.05   19.30
   4  -8   0  149.39    7.30
   4  -8   0  140.09   11.40
  -4  -8   0  135.69    8.40
  -4  -8   0  137.39    9.60
   4  -8   0  145.59    9.60
   4  -8   0  139.39    5.00
  -4  -8   0  133.19    6.30
  -4   8   0  133.79    7.00
  -4   8   0  128.69    8.40
  -4   8   0  128.09   14.10
   4   8   0  173.98   17.20
  -6  -8   0   81.09    7.60
   6  -8   0   90.19    5.20
   6  -8   0  100.29    9.70
  -6  -8   0   78.99    6.70
   6  -8   0   96.99    7.80
  -6  -8   0   83.79    5.10
  -6   8   0   63.29   11.60
   6   8   0   82.59   15.90
  -6   8   0   92.69    4.70
  -8  -8   0  297.57   11.40
  -8  -8   0  270.57   13.50
  -8  -8   0  309.47   15.50
   8  -8   0  277.17   14.10
   8  -8   0  270.97   10.10
   8  -8   0  277.27   16.40
  -8   8   0  254.37   19.80
  10  -8   0  402.06   18.00
 -10  -8   0  410.66   15.10
 -10  -8   0  395.26   17.40
  10  -8   0  401.86   20.30
  10  -8   0  402.56   12.10
 -10  -8   0  407.56   19.00
  10   8   0  389.96   17.10
 -10   8   0  357.36   23.50
  12  -8   0  106.69    8.70
 -12  -8   0   97.39    8.40
 -12  -8   0   98.49    6.70
  12  -8   0  115.19   10.50
  12  -8   0  105.89    4.60
 -12  -8   0   95.59    9.20
  12   8   0   99.89    7.70
 -12   8   0  102.29   12.70
 -14  -8   0  305.17   13.70
  14  -8   0  325.77   16.20
 -14  -8   0  336.47   21.90
  14  -8   0  309.37   17.90
 -14  -8   0  322.37   16.20
 -14   8   0  327.47   22.30
  14   8   0  326.27   14.60
 -16  -8   0   85.49    8.30
 -16  -8   0   83.59    7.00
  16  -8   0   80.89    7.90
 -16  -8   0   79.99    9.10
  16  -8   0   86.99    4.60
  16  -8   0   98.99   10.40
  16   8   0   90.69    7.00
 -16   8   0  102.09   16.30
 -18  -8   0   73.19    8.10
 -18  -8   0   61.19    6.30
  18  -8   0   76.49    8.00
 -18  -8   0   65.39    8.70
 -18   8   0   71.99   13.40
  18   8   0   94.79    7.10
 -20  -8   0  191.78   12.80
 -20  -8   0  190.08   11.60
  20  -8   0  171.98   12.10
 -20  -8   0  187.78   14.60
 -20   8   0  187.18   18.50
  20   8   0  191.38   10.40
   1  -9   0  133.39    5.50
   1  -9   0  123.79    7.70
   1  -9   0  140.79   12.60
  -1  -9   0  137.49    8.30
  -1  -9   0  126.89    5.70
  -1  -9   0  118.59    9.40
   1  -9   0  125.79    9.50
  -1   9   0  120.09   15.30
   1   9   0  112.09   14.90
   3  -9   0  461.25   17.20
   3  -9   0  470.75   20.30
   3  -9   0  473.45   24.20
  -3  -9   0  483.25   18.80
  -3  -9   0  503.45   15.60
  -3  -9   0  493.75   21.00
   3   9   0  430.26   29.30
  -3   9   0  476.35   17.40
  -3   9   0  475.15   29.40
  -5  -9   0   73.49    7.60
   5  -9   0   68.29    5.20
   5  -9   0   70.39    7.30
  -5  -9   0   72.49    6.70
   5  -9   0   73.29   11.10
  -5  -9   0   61.69    4.50
   5   9   0   80.29   17.10
  -5   9   0   71.29   13.60
  -5   9   0   62.59    4.20
   7  -9   0  159.68   13.40
   7  -9   0  163.68   10.90
   7  -9   0  158.68    7.60
  -7  -9   0  160.68    7.90
  -7  -9   0  177.88   11.90
  -7  -9   0  158.38   10.20
   7   9   0  189.08   20.20
  -7   9   0  131.39   15.90
  -7   9   0  165.08    7.00
  -9  -9   0  395.36   19.50
   9  -9   0  404.26   13.70
  -9  -9   0  410.36   18.20
   9  -9   0  431.56   19.20
   9  -9   0  417.06   22.30
  -9  -9   0  406.46   15.20
  -9   9   0  380.96   26.10
   9   9   0  402.16   18.50
  11  -9   0  276.97   17.70
 -11  -9   0  252.07   15.30
 -11  -9   0  270.97   16.10
 -11  -9   0  270.47   11.90
  11  -9   0  265.67   14.60
  11   9   0  259.77   13.70
 -13  -9   0  457.45   17.60
 -13  -9   0  478.55   22.60
  13  -9   0  452.15   13.90
  13  -9   0  476.85   24.10
 -13  -9   0  419.76   20.00
  13  -9   0  443.96   20.50
 -13   9   0  440.56   28.50
  13   9   0  469.45   19.10
 -15  -9   0  395.66   16.60
  15  -9   0  369.36   21.60
  15  -9   0  407.66   19.20
 -15  -9   0  389.56   18.90
 -15  -9   0  388.96   20.70
 -15   9   0  400.46   27.00
  15   9   0  400.06   17.00
 -17  -9   0   32.30    8.80
 -17  -9   0   35.30    5.70
  17  -9   0   30.80    6.40
 -17  -9   0   32.00    6.70
  17   9   0   32.00    5.30
 -17   9   0   20.80    7.80
  19  -9   0  399.76   19.80
 -19  -9   0  395.96   22.40
 -19  -9   0  414.56   18.20
 -19  -9   0  422.16   20.40
  19   9   0  428.76   17.20
 -19   9   0  411.86   28.40
   0 -10   0  462.25   18.30
   0 -10   0  465.15   21.00
   0 -10   0  481.35   14.80
   0  10   0  441.96   30.60
   2 -10   0  132.99    5.50
  -2 -10   0  138.89    6.30
   2 -10   0  135.09    8.40
   2 -10   0  141.59   10.50
  -2 -10   0  137.89    9.00
  -2 -10   0  129.69   10.40
   2  10   0   85.89   15.80
  -2  10   0  141.59   17.80
  -4 -10   0   19.30    5.60
  -4 -10   0   15.50    2.80
  -4 -10   0    7.70    3.20
   4 -10   0    9.30    5.80
   4 -10   0   16.90    5.00
   4 -10   0   10.40    3.10
  -4  10   0    5.20    5.80
   4  10   0   16.10    8.60
  -6 -10   0  143.99    7.20
  -6 -10   0  138.49    9.70
  -6 -10   0  122.19   10.60
   6 -10   0  138.09    7.50
   6 -10   0  147.19   13.90
   6 -10   0  137.29   10.40
  -6  10   0  124.09   16.30
   6  10   0  107.39   18.90
  -6  10   0  131.49    7.40
  -8 -10   0   91.59    6.20
   8 -10   0   96.29    8.90
   8 -10   0   87.79   10.90
  -8 -10   0  119.49   11.60
  -8 -10   0   80.09    8.90
   8 -10   0  101.09    5.90
  -8  10   0   76.69   14.70
 -10 -10   0  452.65   17.10
 -10 -10   0  433.06   20.10
  10 -10   0  474.65   26.10
  10 -10   0  457.25   21.00
  10  10   0  469.65   20.80
 -10  10   0  476.55   31.20
 -12 -10   0  157.78   12.60
 -12 -10   0  148.09    8.80
  12 -10   0  157.38   11.40
 -12 -10   0  142.09   11.00
  12  10   0  150.98   10.60
 -12  10   0  133.99   17.00
 -14 -10   0   15.90    3.90
  14 -10   0   13.60    5.00
 -14 -10   0   12.50    5.00
 -14 -10   0    8.00    4.70
  14  10   0   13.80    4.10
 -14  10   0   25.60   11.20
 -16 -10   0   68.19    6.70
 -16 -10   0   61.89   10.40
 -16 -10   0   44.20    7.70
  16 -10   0   63.99    7.50
  16  10   0   61.29    6.50
 -16  10   0   49.30   13.10
   1 -11   0    2.50    3.50
   1 -11   0    1.90    1.30
  -1 -11   0    5.40    3.30
  -1 -11   0    3.90    3.10
   1 -11   0    7.30    3.30
  -1 -11   0    6.10    1.80
   1  11   0    3.30    6.60
  -1  11   0    9.20    8.50
  -3 -11   0    4.10    3.50
  -3 -11   0   11.50    5.00
  -3 -11   0   10.80    2.50
   3 -11   0   10.80    3.60
   3 -11   0    7.30    3.80
   3  11   0    5.50    7.20
  -3  11   0    4.20    9.50
   5 -11   0  258.67   15.30
  -5 -11   0  257.27   14.10
   5 -11   0  258.97   11.80
  -5 -11   0  263.97   10.60
  -5 -11   0  240.48   15.40
   5  11   0  265.07   26.10
  -5  11   0  248.28   24.20
  -7 -11   0   36.10    4.20
   7 -11   0   25.60    6.20
   7 -11   0   35.40    4.60
  -7 -11   0   24.20    5.10
  -7 -11   0   36.00   11.80
  -7  11   0   18.70    8.90
   7  11   0   36.80   13.80
  -9 -11   0   63.89    9.90
   9 -11   0   73.09    5.20
   9 -11   0   67.49    8.00
  -9 -11   0   75.99   10.30
  -9 -11   0   79.89    6.10
  -9  11   0   46.00   12.70
 -11 -11   0   13.20    3.80
 -11 -11   0   20.40    5.80
 -11 -11   0   21.90    6.30
  11 -11   0   15.50    5.10
 -11  11   0   14.10    8.80
  11  11   0   19.60    5.30
 -13 -11   0    5.10    3.10
 -13 -11   0    4.50    4.30
  13 -11   0    9.00    4.70
 -13 -11   0   11.40    5.20
  13  11   0    7.20    3.60
 -13  11   0    6.70    8.40
  15 -11   0    7.80    4.10
 -15 -11   0    1.40    4.40
 -15 -11   0    3.20    3.60
 -15 -11   0    1.80    3.10
  15  11   0    4.20    3.40
 -15  11   0    3.30    7.90
   0 -12   0  103.49   10.30
   0 -12   0  118.79    5.50
   0 -12   0  107.49    8.50
   0  12   0   73.89   15.90
  -2 -12   0   56.89    6.80
   2 -12   0   56.59    7.40
  -2 -12   0   62.69    8.20
  -2 -12   0   55.79    4.10
   2 -12   0   65.69   10.30
   2  12   0   33.40   12.20
  -2  12   0   64.69   16.10
  -4 -12   0   79.49    5.30
   4 -12   0   70.09    6.60
   4 -12   0   75.69    8.90
  -4 -12   0   65.49    7.70
  -4  12   0   53.19   17.20
   4  12   0   68.09   18.20
  -6 -12   0   25.70    3.80
   6 -12   0   20.70    4.30
   6 -12   0   17.40    5.60
  -6 -12   0   16.60    6.30
  -6 -12   0   13.60    4.30
  -6  12   0   32.80   12.70
   6  12   0   19.10   10.30
   8 -12   0   -0.20    3.00
   8 -12   0    3.40    2.60
  -8 -12   0    4.50    3.90
  -8 -12   0    1.20    3.60
  -8 -12   0    1.20    2.20
  -8  12   0   -2.10    7.60
  10 -12   0  261.27   15.90
 -10 -12   0  234.38   16.50
 -10 -12   0  239.78   15.10
  10 -12   0  267.87   10.70
 -10  12   0  259.27   25.70
  10  12   0  262.07   16.10
 -12 -12   0   54.19    8.20
 -12 -12   0   67.89    6.40
  12 -12   0   83.39    8.90
 -12 -12   0   59.59   10.20
  12  12   0   73.79    8.50
 -12  12   0   64.49   15.90
  -1 -13   0  135.79   12.20
  -1 -13   0  132.19    6.30
   1 -13   0  139.19   10.00
  -1 -13   0  134.79   10.20
   1  13   0   85.69   20.50
  -3 -13   0    7.90    2.30
   3 -13   0    9.50    5.30
  -3 -13   0   12.70    4.20
  -3 -13   0    9.00    5.00
   3  13   0    5.70    7.90
  -3  13   0    4.40   10.60
   5 -13   0  171.58   10.10
  -5 -13   0  181.18    8.50
  -5 -13   0  182.88   12.60
   5 -13   0  157.18   12.90
  -5 -13   0  165.68   13.70
  -5  13   0  171.98   22.60
   7 -13   0   69.49    8.70
  -7 -13   0   65.59    5.40
  -7 -13   0   56.89    9.30
   7 -13   0   69.79    6.10
  -7 -13   0   61.59    9.40
  -7  13   0   68.29   19.80
 -24   0   1   -0.30    1.80
 -24   0   1    2.20    3.60
 -22   0   1   -0.90    2.00
 -22   0   1   -0.20    2.50
  22   0  -1    2.40    1.60
 -20   0   1    1.90    2.20
 -20   0   1    0.00    2.90
 -18   0   1   -1.50    2.20
 -18   0   1    1.60    2.10
  18   0  -1   -2.30    1.90
  18   0  -1    1.00    1.10
 -18   0   1   -1.40    1.50
 -18   0   1    0.00    1.40
  16   0  -1   -2.80    1.50
  16   0  -1   -0.40    0.90
 -16   0   1   -1.60    1.00
 -16   0   1    0.80    1.70
 -16   0   1    1.10    2.60
 -16   0   1   -1.40    1.10
  14   0  -1    0.30    1.30
  14   0  -1    0.60    1.80
  14   0  -1    1.40    1.10
 -14   0   1   -0.70    1.10
 -14   0   1    2.70    1.50
 -14   0   1    2.10    1.40
 -14   0   1   -0.70    1.60
  12   0  -1   -0.20    1.30
 -12   0   1    1.70    1.30
 -12   0   1    0.70    1.10
  12   0  -1    0.90    1.20
 -12   0   1    1.00    1.30
  12   0  -1    0.30    0.70
 -12   0   1   -1.40    1.10
  12   0  -1    0.70    0.70
  10   0  -1    1.10    0.90
  10   0  -1    2.00    1.40
  10   0  -1    3.00    1.10
 -10   0   1    0.70    1.10
 -10   0   1    1.10    1.40
 -10   0   1    0.00    0.80
  10   0  -1    0.50    0.70
 -10   0   1   -0.50    0.80
  -8   0   1    0.60    0.90
   8   0  -1   -0.10    0.80
  -8   0   1    0.10    0.90
  -8   0   1    0.70    0.90
   8   0  -1    0.00    0.70
   8   0  -1    1.80    0.80
   8   0  -1    1.00    1.20
  -8   0   1    0.00    1.10
   6   0  -1    1.50    0.70
   6   0  -1    0.10    0.60
  -6   0   1    0.10    0.50
   6   0  -1    0.60    0.60
  -6   0   1    3.40    1.00
  -6   0   1   -0.20    0.50
  -6   0   1    0.40    0.80
  -4   0   1    0.30    0.50
  -4   0   1    0.20    0.60
  -4   0   1    0.20    0.50
  -4   0   1    0.90    0.70
   4   0  -1   -0.30    0.40
   4   0  -1    0.30    0.50
  -2   0   1    0.20    9.30
   2   0  -1    5.30   11.40
   0   0  -1   -0.10    0.40
   0   0   1    0.30    0.50
   0   0   1    0.50    0.40
   2   0   1    0.20    0.40
  -2   0  -1    0.90    0.90
   2   0   1    0.60    0.90
  -2   0  -1    0.80    0.40
   2   0   1   -0.10    0.70
  -2   0  -1    0.10    0.70
   4   0   1    0.80    0.60
  -4   0  -1    0.30    1.00
   4   0   1    1.40    0.90
   4   0   1    0.90    1.10
  -4   0  -1    0.00    0.90
  -4   0  -1    1.60    0.70
   6   0   1   -0.50    1.20
  -6   0  -1    0.30    1.30
   6   0   1   -0.20    0.90
   6   0   1    0.50    0.60
  -6   0  -1    0.30    1.00
   6   0   1    0.00    0.60
   6   0   1    0.40    1.00
  -6   0  -1   -0.50    0.70
  -8   0  -1   -0.30    0.90
  -8   0  -1   -0.40    0.90
   8   0   1    0.30    0.80
   8   0   1    0.10    1.10
   8   0   1    0.40    0.70
  -8   0  -1    0.20    1.30
   8   0   1    1.10    0.80
   8   0   1    1.70    1.40
  10   0   1    0.50    0.90
 -10   0  -1    1.10    1.80
  10   0   1    0.20    1.20
  10   0   1   -0.20    1.30
  10   0   1    1.70    0.90
 -10   0  -1    0.00    1.00
 -10   0  -1    0.90    1.40
  10   0   1    0.90    1.00
 -12   0  -1    1.70    1.60
  12   0   1    0.80    1.00
 -12   0  -1   -0.90    1.20
  12   0   1    1.30    1.30
 -12   0  -1    0.00    1.80
  12   0   1   -0.70    1.70
  12   0   1    0.80    0.90
  12   0   1    0.00    1.30
  14   0   1   -0.80    2.00
 -14   0  -1   -0.40    1.30
  14   0   1    0.00    1.20
 -14   0  -1   -0.70    1.50
  14   0   1    0.50    1.10
 -14   0  -1   -0.30    2.10
 -16   0  -1   -0.60    2.60
  16   0   1   -1.70    2.20
 -16   0  -1   -0.80    1.40
  16   0   1    2.20    1.70
  18   0   1    3.10    2.50
  18   0   1    2.30    1.40
 -18   0  -1   -1.40    1.60
 -18   0  -1   -2.30    2.50
 -20   0  -1   -0.90    2.70
  20   0   1   -0.70    2.60
 -20   0  -1    4.30    4.20
 -22   0  -1    1.40    2.10
 -22   0  -1   -0.80    3.30
  22   0   1    5.20    4.00
 -24   0  -1    2.20    3.70
  24   0   1   -2.70    3.00
 -24   0  -1   -0.20    2.30
 -25  -1   1  114.99    8.70
 -25  -1   1  128.29   12.50
 -25   1   1  146.69   13.30
 -25   1   1  134.39    9.00
 -23  -1   1   73.29    6.80
 -23  -1   1   84.39    9.80
 -23   1   1   88.29   10.00
 -23   1   1   76.09    6.70
 -21  -1   1    1.40    2.10
 -21  -1   1    2.20    3.10
 -21  -1   1    0.60    2.40
 -21   1   1    5.90    4.20
 -21   1   1    3.90    2.50
 -19  -1   1  448.06   20.50
 -19  -1   1  471.35   16.20
 -19  -1   1  453.65   17.30
 -19  -1   1  436.46   17.10
  19  -1  -1  453.65   14.00
  19   1  -1  422.66   15.00
  19   1  -1  476.65   17.90
 -19   1   1  434.86   16.60
 -19   1   1  465.45   21.30
  17  -1  -1  558.84   16.50
 -17  -1   1  526.95   22.00
 -17  -1   1  564.04   18.50
 -17  -1   1  565.74   19.50
 -17   1   1  524.45   22.40
 -17   1   1  540.15   18.80
  17   1  -1  580.34   17.90
  17   1  -1  539.95   19.50
 -17   1   1  558.14   21.60
  15  -1  -1  147.09    5.60
 -15  -1   1  142.39    7.10
 -15  -1   1  142.79    7.60
 -15  -1   1  143.89    9.10
 -15  -1   1  142.69    7.40
 -15   1   1  153.48    8.00
 -15   1   1  140.69    9.50
  15   1  -1  153.48    7.80
  15   1  -1  151.48    6.60
 -15   1   1  150.68    7.30
 -15   1   1  151.38    6.00
  13  -1  -1 1274.37   33.70
 -13  -1   1 1235.68   38.20
 -13  -1   1 1294.17   35.70
  13  -1  -1 1218.68   34.90
 -13  -1   1 1254.57   36.10
  13  -1  -1 1239.48   36.00
 -13  -1   1 1240.28   35.90
 -13   1   1 1244.68   36.50
  13   1  -1 1141.49   36.20
 -13   1   1 1267.37   34.00
 -13   1   1 1203.28   35.40
 -13   1   1 1247.78   38.70
  13   1  -1 1272.87   36.10
  13   1  -1 1273.97   35.00
 -11  -1   1  975.20   28.30
 -11  -1   1  981.70   28.00
  11  -1  -1  967.20   28.30
  11  -1  -1  978.50   26.30
 -11  -1   1  974.00   28.10
 -11  -1   1  963.10   29.80
  11  -1  -1  967.50   27.40
 -11   1   1  944.91   28.70
  11   1  -1  962.90   27.50
  11   1  -1  978.00   28.10
  11   1  -1  955.40   28.70
 -11   1   1  963.30   27.70
 -11   1   1  954.50   30.00
  -9  -1   1 1381.36   38.10
   9  -1  -1 1360.96   38.30
  -9  -1   1 1403.66   38.50
   9  -1  -1 1376.36   37.70
  -9  -1   1 1345.77   39.50
  -9  -1   1 1412.36   38.40
   9  -1  -1 1445.16   36.80
   9   1  -1 1377.26   38.90
  -9   1   1 1381.76   39.00
  -9   1   1 1406.06   38.00
   9   1  -1 1379.76   38.00
  -9   1   1 1382.56   39.80
   9   1  -1 1388.66   38.10
   9   1  -1 1386.76   38.00
  -7  -1   1 3578.64   93.29
   7  -1  -1 3567.94   93.69
  -7   1   1 3516.85   94.59
   7   1  -1 3605.54   93.29
   7   1  -1 3585.44   94.29
  -7   1   1 3596.84   94.39
   5  -1  -1  485.15   14.30
  -5  -1   1  504.25   15.20
   5  -1  -1  532.65   14.50
  -5  -1   1  494.35   14.70
  -5  -1   1  509.75   14.90
   5   1  -1  513.45   14.70
  -5   1   1  505.45   15.00
   5   1  -1  506.55   15.00
  -5   1   1  507.35   14.20
  -5   1   1  521.05   15.40
  -5   1   1  518.55   14.60
  -3  -1   1  140.29    6.90
  -3  -1   1  138.79    4.90
  -3  -1   1  140.59    5.10
  -3  -1   1  143.09    4.90
  -3   1   1  132.79    4.60
   3   1  -1  139.29    4.90
  -3   1   1  142.29    4.20
  -1  -1   1 9341.26  354.96
   1  -1  -1 9999.00  323.57
  -1   1   1 9483.65  320.67
   1  -1   1   88.49    3.90
  -1  -1  -1   84.39    3.40
   1  -1   1   85.99    3.60
  -1  -1  -1   86.59    2.80
   1  -1   1   81.19    4.10
  -1   1  -1   76.59    3.70
  -1   1  -1   73.79    3.40
   1   1   1   83.69    2.80
   1   1   1   83.89    4.10
   1   1   1   85.49    3.30
  -1   1  -1   85.69    4.30
   1   1   1   82.09    3.30
  -3  -1  -1  137.29    5.20
   3  -1   1  142.89    6.00
  -3  -1  -1  134.89    4.70
  -3  -1  -1  140.79    5.80
  -3  -1  -1  137.89    5.60
   3  -1   1  143.19    5.70
   3  -1   1  143.89    4.70
   3  -1   1  136.89    5.70
   3   1   1  139.49    5.90
  -3   1  -1  137.29    6.30
   3   1   1  144.09    6.00
   3   1   1  141.49    4.70
  -3   1  -1  134.89    4.70
   3   1   1  138.89    5.10
   5  -1   1   18.20    2.30
   5  -1   1   20.10    2.30
  -5  -1  -1   22.40    2.50
  -5  -1  -1   18.70    1.90
  -5  -1  -1   18.80    2.20
   5  -1   1   18.60    1.50
  -5  -1  -1   23.00    1.80
   5  -1   1   19.00    2.30
  -5   1  -1   20.20    2.30
   5   1   1   18.00    1.60
   5   1   1   19.30    2.40
  -5   1  -1   22.00    2.20
  -5   1  -1   17.70    3.00
   5   1   1   21.20    1.90
   5   1   1   19.30    2.10
  -5   1  -1   18.90    1.60
   7  -1   1    4.20    1.70
  -7  -1  -1    4.80    1.70
  -7  -1  -1    9.40    1.90
   7  -1   1    6.40    2.30
   7  -1   1    5.10    1.10
   7  -1   1    8.00    2.30
  -7  -1  -1    3.50    1.10
   7  -1   1    3.90    1.10
  -7  -1  -1    6.20    2.20
  -7   1  -1    8.00    2.10
   7   1   1    3.80    1.20
   7   1   1    6.20    1.80
   7   1   1    9.00    2.30
  -7   1  -1    7.70    2.00
   7   1   1    2.40    0.80
  -7   1  -1    4.00    2.20
   9  -1   1  768.82   22.20
   9  -1   1  769.62   22.90
  -9  -1  -1  766.02   22.90
  -9  -1  -1  778.52   24.10
   9  -1   1  764.62   24.60
   9  -1   1  745.23   23.90
  -9  -1  -1  745.23   24.90
  -9  -1  -1  807.82   22.90
   9  -1   1  779.92   21.80
   9   1   1  785.02   24.20
  -9   1  -1  761.32   22.60
   9   1   1  776.02   22.60
  -9   1  -1  795.22   26.00
   9   1   1  754.72   23.90
  -9   1  -1  738.63   23.90
  11  -1   1  848.82   24.80
  11  -1   1  831.52   26.20
 -11  -1  -1  838.32   24.90
 -11  -1  -1  865.71   26.50
 -11  -1  -1  826.82   27.70
 -11  -1  -1  828.72   25.00
  11  -1   1  847.52   27.00
  11  -1   1  841.72   23.70
  11   1   1  837.02   26.40
  11   1   1  818.82   24.50
 -11   1  -1  829.62   24.70
  11   1   1  798.92   24.30
 -11   1  -1  808.72   26.10
  11   1   1  800.92   26.00
 -11   1  -1  794.32   28.20
  13  -1   1  454.65   17.40
 -13  -1  -1  451.35   15.30
 -13  -1  -1  424.66   15.30
  13  -1   1  395.56   14.30
  13  -1   1  459.15   14.90
 -13  -1  -1  449.36   18.40
  13  -1   1  449.56   14.00
 -13   1  -1  433.86   19.00
  13   1   1  432.36   16.60
  13   1   1  442.56   14.70
 -13   1  -1  435.46   16.50
  13   1   1  445.76   14.60
 -13   1  -1  443.36   15.20
 -15  -1  -1  141.89   10.00
  15  -1   1  152.68    6.40
 -15  -1  -1  140.29    8.40
 -15  -1  -1  147.89    7.80
  15  -1   1  151.98    9.30
 -15   1  -1  145.49    7.60
  15   1   1  150.98    7.10
  15   1   1  148.99    8.80
 -15   1  -1  144.59   10.60
 -17  -1  -1  320.47   13.20
  17  -1   1  335.47   15.40
 -17  -1  -1  310.87   16.60
  17  -1   1  321.77   11.20
 -17   1  -1  309.67   17.20
  17   1   1  280.67   11.60
 -17   1  -1  309.57   12.90
  17   1   1  320.07   14.60
 -19  -1  -1  273.67   12.50
  19  -1   1  257.67   14.20
 -19  -1  -1  289.07   16.70
  19   1   1  282.87   13.90
 -19   1  -1  250.67   16.20
 -19   1  -1  283.17   12.50
  21  -1   1  217.88    8.90
 -21  -1  -1  208.88   15.30
  21  -1   1  209.48   13.20
 -21  -1  -1  231.38   11.70
 -21   1  -1  211.28   15.80
  21   1   1  213.88   12.60
 -21   1  -1  246.58   11.70
  23  -1   1   46.40    4.30
 -23  -1  -1   48.70   10.00
 -23  -1  -1   54.39    6.00
  23  -1   1   39.10    7.40
 -23   1  -1   68.19   12.30
 -23   1  -1   46.80    5.60
  23   1   1   61.39    7.40
 -25  -1  -1    1.20    2.50
  25  -1   1    1.20    4.10
 -25  -1  -1    2.50    4.70
 -25   1  -1    8.10    5.60
 -25   1  -1    3.10    2.60
  25   1   1   10.90    4.30
 -24  -2   1  276.57   12.60
 -24  -2   1  252.27   17.10
 -24  -2   1  274.27   13.80
 -24   2   1  276.37   13.10
 -24   2   1  277.97   18.70
 -22  -2   1  353.76   15.70
 -22  -2   1  375.26   14.90
 -22  -2   1  320.47   18.50
  22   2  -1  349.67   15.40
 -22   2   1  386.56   20.90
 -20  -2   1   89.69    6.70
 -20  -2   1   89.89   10.10
 -20  -2   1   95.59    6.70
  20   2  -1  103.89    7.10
 -20   2   1  107.79    6.90
 -20   2   1  101.19   12.30
 -18  -2   1  335.27   14.00
 -18  -2   1  355.86   13.80
 -18  -2   1  332.37   16.50
 -18   2   1  340.67   17.60
  18   2  -1  332.67   13.60
 -18   2   1  329.17   13.10
 -16  -2   1  513.65   17.90
 -16  -2   1  503.45   18.10
 -16  -2   1  507.45   17.70
 -16  -2   1  514.15   20.60
  16   2  -1  479.95   16.70
  16   2  -1  512.95   17.50
 -16   2   1  500.55   21.40
 -16   2   1  525.35   17.30
 -14  -2   1 3667.63   96.59
 -14  -2   1 3559.74   96.59
  14  -2  -1 3465.45   94.69
 -14  -2   1 3602.04   96.09
 -14  -2   1 3497.55   98.89
  14   2  -1 3623.84   95.79
 -14   2   1 3631.44  100.39
  14   2  -1 3677.33   96.49
 -14   2   1 3470.25   95.29
 -14   2   1 3565.74   97.39
 -12  -2   1 1485.05   44.00
  12  -2  -1 1480.65   41.80
  12  -2  -1 1470.75   40.60
 -12  -2   1 1523.65   42.20
 -12  -2   1 1486.95   42.10
 -12  -2   1 1512.45   41.60
 -12   2   1 1501.75   41.10
  12   2  -1 1457.65   42.70
  12   2  -1 1471.75   41.40
 -12   2   1 1468.05   42.80
  12   2  -1 1489.15   41.30
 -12   2   1 1497.55   44.90
  12   2  -1 1370.16   41.00
 -10  -2   1 1005.40   30.70
  10  -2  -1 1006.90   29.10
 -10  -2   1 1028.50   29.50
  10  -2  -1 1000.40   28.00
 -10  -2   1 1002.90   28.60
  10   2  -1  997.80   28.30
 -10   2   1 1014.10   31.40
 -10   2   1  991.50   29.90
  10   2  -1  998.10   28.80
 -10   2   1 1018.20   28.30
  10   2  -1  990.30   29.90
  10   2  -1 1008.30   29.60
  -8  -2   1  603.14   19.20
  -8  -2   1  639.24   20.20
   8  -2  -1  611.04   18.80
   8  -2  -1  631.34   17.90
  -8  -2   1  658.53   18.40
   8   2  -1  637.74   19.70
  -8   2   1  627.54   18.00
   8   2  -1  619.14   18.50
  -8   2   1  626.54   19.70
   8   2  -1  619.84   18.00
  -8   2   1  629.34   20.50
  -8   2   1  661.13   18.80
   8   2  -1  633.24   18.90
  -6  -2   1 6171.38  162.68
   6  -2  -1 6053.09  162.38
  -6  -2   1 6229.08  168.78
  -6   2   1 6322.67  162.78
   6   2  -1 6640.14  163.18
  -6   2   1 6094.79  163.68
   4  -2  -1 7555.44  311.47
  -4  -2   1 7065.09  389.06
  -4   2   1 7536.95  327.97
   2  -2  -1 9845.32  385.26
   2   2  -1 9101.29  431.06
  -2   2   1 9988.20  439.56
   0  -2  -1  812.52   21.40
   0  -2   1  799.42   22.40
   0  -2  -1  813.02   22.80
   0  -2  -1  807.42   22.50
   0  -2  -1  815.92   25.20
   0  -2   1  828.32   23.50
   0   2  -1  825.72   22.70
   0   2   1  818.72   25.80
   0   2  -1  821.02   23.30
   0   2   1  810.32   22.80
   0   2  -1  839.12   22.40
   0   2   1  830.62   21.40
   0   2  -1  800.52   23.50
   2  -2   1   69.79    3.90
  -2  -2  -1   80.99    6.20
   2  -2   1   76.39    3.10
  -2  -2  -1   78.99    3.70
   2  -2   1   71.89    4.50
  -2  -2  -1   75.29    3.80
  -2  -2  -1   71.99    2.90
   2  -2   1   74.09    4.30
  -2   2  -1   66.99    3.70
   2   2   1   77.89    4.20
  -2   2  -1   76.89    4.10
  -2   2  -1   68.89    5.00
   2   2   1   72.59    3.50
   2   2   1   74.69    3.10
   4  -2   1 2173.58   56.69
   4  -2   1 2140.49   59.39
  -4  -2  -1 2143.89   58.49
  -4  -2  -1 2143.69   57.79
   4  -2   1 2147.29   58.59
   4   2   1 2144.59   58.19
   4   2   1 2189.58   58.89
  -4   2  -1 2145.19   60.19
  -4   2  -1 2124.49   58.29
  -4   2  -1 2139.89   58.29
   4   2   1 2224.58   56.89
  -6  -2  -1 4399.46  118.09
   6  -2   1 4526.45  117.89
   6  -2   1 4389.26  118.69
  -6   2  -1 4538.95  120.19
   6   2   1 4510.95  118.09
   6   2   1 4470.45  116.99
  -6   2  -1 4335.37  117.89
  -6   2  -1 4465.95  117.49
  -8  -2  -1  164.68    6.80
  -8  -2  -1  169.18    7.90
   8  -2   1  172.58    8.30
   8  -2   1  171.18    8.10
  -8  -2  -1  163.08    8.20
   8  -2   1  171.78    7.50
  -8  -2  -1  166.38    7.20
   8  -2   1  164.78    6.20
  -8   2  -1  167.58    9.30
   8   2   1  172.38    7.00
   8   2   1  164.18    6.50
   8   2   1  160.68    7.60
  -8   2  -1  163.78    6.40
  -8   2  -1  157.18    7.70
  -8   2  -1  166.18    7.10
  10  -2   1   59.69    5.20
 -10  -2  -1   49.50    3.90
  10  -2   1   54.89    3.30
  10  -2   1   55.59    2.90
 -10  -2  -1   56.69    4.40
 -10  -2  -1   57.59    5.10
  10  -2   1   56.69    4.20
  10  -2   1   58.99    4.60
 -10  -2  -1   52.09    3.80
  10   2   1   56.39    3.50
  10   2   1   58.89    4.50
  10   2   1   49.99    4.40
 -10   2  -1   51.89    3.50
 -10   2  -1   65.69    4.70
 -10   2  -1   50.19    5.50
 -10   2  -1   56.69    3.80
  10   2   1   51.79    3.70
 -12  -2  -1    8.90    2.20
  12  -2   1   15.60    3.10
  12  -2   1   15.00    2.10
 -12  -2  -1   13.40    3.20
  12  -2   1    9.90    1.80
  12  -2   1   11.70    3.30
 -12  -2  -1   14.40    3.00
 -12  -2  -1    9.00    2.80
 -12   2  -1   11.80    2.90
  12   2   1    7.30    2.50
 -12   2  -1   11.90    2.50
 -12   2  -1   12.30    2.40
 -12   2  -1    5.10    3.00
 -14  -2  -1 1118.69   34.50
  14  -2   1 1154.38   32.10
 -14  -2  -1 1147.29   38.10
 -14  -2  -1 1178.18   36.00
 -14  -2  -1 1205.68   35.00
  14  -2   1 1201.08   37.50
  14   2   1 1136.29   34.00
 -14   2  -1 1114.49   33.90
  14   2   1 1199.38   36.10
 -14   2  -1 1107.59   39.50
 -16  -2  -1  741.13   28.10
  16  -2   1  761.12   22.50
 -16  -2  -1  762.82   25.30
  16  -2   1  780.52   28.20
 -16  -2  -1  789.92   25.40
  16   2   1  796.12   26.70
 -16   2  -1  753.62   24.70
  16   2   1  797.42   23.90
 -16   2  -1  799.02   31.20
 -18  -2  -1  267.07   15.50
  18  -2   1  260.97    9.50
  18  -2   1  284.67   14.90
 -18  -2  -1  264.77   12.30
 -18   2  -1  286.87   12.10
  18   2   1  274.67   13.40
 -18   2  -1  273.37   16.90
  20  -2   1   78.09    8.40
 -20  -2  -1   78.39    6.70
 -20  -2  -1   75.89    8.80
 -20   2  -1   64.49   10.30
  20   2   1   85.69    7.60
 -20   2  -1   85.79    6.50
  22  -2   1  311.57   19.60
 -22  -2  -1  354.86   20.20
 -22  -2  -1  347.17   15.50
 -22   2  -1  353.96   21.50
 -22   2  -1  340.17   14.80
  22   2   1  325.97   16.30
 -24  -2  -1  338.57   21.00
 -24  -2  -1  305.27   15.20
 -24   2  -1  312.07   14.70
  24   2   1  318.77   16.20
 -24   2  -1  330.07   21.80
 -23  -3   1  196.58   14.50
 -23  -3   1  217.48   11.30
 -23  -3   1  219.48   12.00
  23   3  -1  225.88   11.40
 -23   3   1  204.08   10.60
 -23   3   1  209.78   16.00
 -21  -3   1  139.29    8.90
 -21  -3   1  124.79    7.90
 -21  -3   1  125.09    8.30
 -21  -3   1  122.69   10.60
 -21   3   1  135.69    7.90
  21   3  -1  128.79    7.90
 -21   3   1  127.99   12.00
 -19  -3   1   11.30    2.90
 -19  -3   1   18.00    5.40
 -19  -3   1   11.20    3.40
 -19   3   1   14.00    3.00
  19   3  -1   12.60    3.40
 -19   3   1   15.90    5.20
 -17  -3   1  420.46   15.30
 -17  -3   1  402.26   18.10
 -17  -3   1  391.46   15.70
 -17  -3   1  408.56   15.90
  17   3  -1  409.26   14.80
 -17   3   1  403.46   14.50
 -17   3   1  368.56   19.10
  15  -3  -1 1590.24   47.10
 -15  -3   1 1763.12   48.90
 -15  -3   1 1701.83   49.50
 -15  -3   1 1712.03   49.80
 -15  -3   1 1744.03   52.49
  15   3  -1 1776.52   48.30
 -15   3   1 1766.72   48.00
 -15   3   1 1679.73   53.89
 -13  -3   1  563.84   17.80
 -13  -3   1  565.34   18.50
  13  -3  -1  478.75   17.60
 -13  -3   1  553.54   18.90
  13  -3  -1  543.85   16.60
 -13  -3   1  521.25   20.20
 -13   3   1  493.75   18.90
  13   3  -1  516.55   17.70
 -13   3   1  568.64   17.10
  13   3  -1  545.95   17.20
 -13   3   1  559.44   21.70
 -13   3   1  564.84   17.10
 -11  -3   1  191.48    9.80
 -11  -3   1  199.48    8.50
 -11  -3   1  194.48    8.90
  11  -3  -1  202.78    7.10
  11   3  -1  205.28    7.70
 -11   3   1  191.78    7.90
  11   3  -1  187.58    9.00
  11   3  -1  203.38    7.70
  11   3  -1  180.68    7.70
 -11   3   1  193.38   10.60
 -11   3   1  209.58    7.50
 -11   3   1  199.98   10.10
  -9  -3   1  498.25   17.70
  -9  -3   1  484.15   16.80
  -9  -3   1  472.65   22.60
   9  -3  -1  525.65   16.60
   9  -3  -1  508.85   14.70
   9  -3  -1  504.65   16.40
  -9  -3   1  516.55   16.30
  -9   3   1  493.35   18.60
   9   3  -1  525.15   16.60
   9   3  -1  479.55   16.10
   9   3  -1  500.35   17.20
   9   3  -1  525.45   16.00
   9   3  -1  516.95   15.30
  -9   3   1  510.15   16.30
  -9   3   1  510.05   14.90
  -9   3   1  481.65   17.10
  -7  -3   1  830.52   25.00
   7  -3  -1  796.52   24.10
   7  -3  -1  784.32   22.00
  -7  -3   1  809.82   23.50
  -7  -3   1  814.62   25.30
  -7  -3   1  810.22   24.40
   7  -3  -1  826.62   24.10
  -7  -3   1  771.92   30.10
  -7   3   1  827.92   25.10
  -7   3   1  810.72   22.10
   7   3  -1  805.42   22.80
   7   3  -1  826.92   24.00
  -7   3   1  815.22   24.30
   7   3  -1  804.32   23.80
  -7   3   1  811.02   26.00
   7   3  -1  797.52   24.70
   5  -3  -1 4096.79  110.29
  -5  -3   1 4065.99  116.29
   5  -3  -1 4194.38  109.79
  -5  -3   1 4185.08  110.09
  -5  -3   1 4132.99  110.79
   5   3  -1 4212.88  117.29
  -5   3   1 4348.06  114.39
   5   3  -1 4097.99  110.19
  -5   3   1 4210.68  110.69
  -3  -3   1 2854.61   77.39
   3  -3  -1 2862.61   76.09
  -3  -3   1 2795.72   81.39
   3  -3  -1 2835.12   77.19
  -3  -3   1 2883.81   77.29
   3  -3  -1 2907.11   74.69
   3   3  -1 2809.42   76.89
  -3   3   1 2872.51   79.19
   3   3  -1 2829.72   75.79
  -3   3   1 2929.61   74.69
   3   3  -1 2883.61   82.49
   3   3  -1 2862.61   76.89
  -3   3   1 2861.81   76.19
  -3   3   1 2910.51   77.49
   1  -3  -1    1.40    0.90
  -1  -3   1    2.00    1.70
   1  -3  -1    6.40    2.50
  -1  -3   1    2.50    1.10
  -1  -3   1    1.90    1.40
   1  -3  -1    2.90    1.40
  -1  -3   1    2.10    2.10
  -1   3   1    2.60    3.10
  -1   3   1    2.80    1.90
   1   3  -1    1.60    0.70
  -1   3   1    1.90    0.90
   1   3  -1    2.20    1.40
  -1   3   1    3.40    1.30
   1   3  -1    3.00    2.70
   1   3  -1    2.40    1.60
   1  -3   1 1178.38   31.80
   1  -3   1 1183.08   33.60
  -1  -3  -1 1170.58   32.20
  -1  -3  -1 1174.58   30.80
   1  -3   1 1162.38   33.90
  -1  -3  -1 1138.59   32.80
  -1  -3  -1 1160.78   36.60
   1  -3   1 1145.99   35.20
  -1   3  -1 1135.99   33.40
   1   3   1 1140.29   30.70
  -1   3  -1 1172.68   31.60
   1   3   1 1193.38   37.90
   1   3   1 1150.78   32.80
  -1   3  -1 1188.28   32.70
   1   3   1 1173.08   32.10
  -1   3  -1 1148.19   36.80
   3  -3   1 2332.77   64.39
  -3  -3  -1 2322.17   61.59
   3  -3   1 2333.37   63.99
   3  -3   1 2396.36   61.69
   3  -3   1 2384.16   64.09
  -3  -3  -1 2368.96   68.69
   3  -3   1 2304.37   65.19
  -3  -3  -1 2325.57   63.59
  -3  -3  -1 2347.47   62.89
  -3   3  -1 2350.56   66.79
   3   3   1 2343.17   61.39
   3   3   1 2321.67   63.39
  -3   3  -1 2346.27   63.89
  -3   3  -1 2281.27   63.19
   3   3   1 2345.47   62.69
   5  -3   1 1231.48   33.70
   5  -3   1 1228.18   37.10
  -5  -3  -1 1277.57   34.80
  -5  -3  -1 1244.18   35.50
   5  -3   1 1261.57   33.60
   5  -3   1 1304.47   37.00
   5  -3   1 1250.57   36.60
  -5  -3  -1 1240.68   41.90
   5   3   1 1237.08   34.00
  -5   3  -1 1239.18   38.80
   5   3   1 1258.77   36.60
   5   3   1 1251.77   35.10
   5   3   1 1225.38   36.00
  -5   3  -1 1265.67   36.10
  -5   3  -1 1240.48   36.00
  -7  -3  -1 2429.86   64.09
   7  -3   1 2314.97   66.59
  -7  -3  -1 2386.26   65.29
   7  -3   1 2374.16   63.19
   7  -3   1 2489.15   67.09
  -7  -3  -1 2387.66   66.49
  -7   3  -1 2427.36   65.99
   7   3   1 2358.46   63.69
   7   3   1 2282.97   65.59
   7   3   1 2398.76   64.69
  -7   3  -1 2381.66   65.39
  -7   3  -1 2425.06   68.99
   9  -3   1  396.46   14.70
   9  -3   1  401.36   12.50
  -9  -3  -1  395.56   15.50
  -9  -3  -1  390.46   14.80
  -9  -3  -1  395.36   14.30
   9  -3   1  410.36   15.90
  -9  -3  -1  397.36   13.50
   9  -3   1  396.66   15.50
   9   3   1  388.36   14.70
   9   3   1  403.66   13.80
  -9   3  -1  390.96   17.30
   9   3   1  413.96   16.20
  -9   3  -1  394.06   14.20
  -9   3  -1  395.76   12.80
 -11  -3  -1  122.49    6.30
  11  -3   1  116.89    7.90
 -11  -3  -1  127.59    7.30
  11  -3   1  120.19    6.90
 -11  -3  -1  128.59    8.10
  11  -3   1  107.59    6.80
  11  -3   1  117.79    5.30
  11  -3   1  114.49    4.50
 -11  -3  -1  117.89    6.70
  11   3   1  123.19    7.20
  11   3   1  113.79    6.10
  11   3   1  103.39    6.60
 -11   3  -1  118.69    6.30
 -11   3  -1  119.09    5.70
  11   3   1  103.49    5.50
 -11   3  -1  126.09    9.30
 -11   3  -1  109.99    6.90
 -13  -3  -1  794.12   25.40
 -13  -3  -1  829.52   26.10
  13  -3   1  748.33   23.70
 -13  -3  -1  789.92   28.30
 -13  -3  -1  814.12   28.50
  13  -3   1  796.12   28.40
  13  -3   1  840.62   26.00
 -13   3  -1  818.12   30.80
 -13   3  -1  821.82   24.60
  13   3   1  835.52   26.60
 -13   3  -1  796.62   25.10
  13   3   1  784.62   26.50
  15  -3   1  427.06   18.60
 -15  -3  -1  385.76   16.20
 -15  -3  -1  390.76   15.60
 -15  -3  -1  411.96   18.50
 -15  -3  -1  407.76   15.40
  15  -3   1  417.76   15.40
 -15   3  -1  406.76   14.80
 -15   3  -1  400.56   14.50
  15   3   1  398.26   16.20
 -15   3  -1  399.26   20.10
 -17  -3  -1  315.07   16.60
  17  -3   1  313.87   12.80
 -17  -3  -1  314.07   13.70
  17  -3   1  285.77   15.60
 -17  -3  -1  302.37   13.20
  17   3   1  307.37   14.00
 -17   3  -1  308.97   12.50
  17   3   1  319.97   12.60
 -17   3  -1  329.87   18.60
 -19  -3  -1  546.55   20.50
 -19  -3  -1  564.04   20.40
  19  -3   1  555.04   23.80
 -19  -3  -1  493.15   24.40
 -19   3  -1  498.45   26.80
 -19   3  -1  545.45   19.30
  19   3   1  529.25   20.90
 -21  -3  -1   53.09    5.80
 -21  -3  -1   44.50    8.90
 -21   3  -1   62.59   11.90
  21   3   1   53.59    7.20
 -23  -3  -1  104.39   11.30
 -23  -3  -1   88.19    7.70
 -23   3  -1  102.09    7.60
 -23   3  -1  111.29   12.70
  23   3   1  110.19    8.90
  24  -4  -1   69.99    6.70
 -24  -4   1   61.49    6.80
 -24  -4   1   64.99   11.50
 -24  -4   1   68.59    7.20
  24   4  -1   63.79    5.90
 -24   4   1   92.29   14.50
 -24   4   1   61.19    5.80
 -22  -4   1   69.19   11.30
 -22  -4   1   36.50    5.40
 -22  -4   1   51.39    6.00
 -22   4   1   64.39   11.10
 -22   4   1   50.99    5.20
  22   4  -1   46.00    5.00
 -20  -4   1   46.50    8.60
 -20  -4   1   32.80    5.70
 -20  -4   1   48.80    6.70
  20   4  -1   38.30    4.30
 -20   4   1   42.50    8.80
 -20   4   1   36.00    4.10
 -18  -4   1    1.80    2.20
 -18  -4   1    0.90    1.70
 -18  -4   1    2.60    3.10
 -18   4   1   -0.20    1.50
  18   4  -1    3.60    2.10
 -18   4   1    1.10    3.00
 -16  -4   1   96.19    8.30
 -16  -4   1   92.19    6.60
 -16  -4   1   97.49    7.20
  16  -4  -1  102.89    7.00
  16  -4  -1   97.99    5.60
  16   4  -1  100.09    5.80
 -16   4   1   97.39    5.70
 -16   4   1   98.89    9.40
 -16   4   1   96.19    5.50
 -14  -4   1   92.09    6.20
 -14  -4   1   95.59   11.10
 -14  -4   1   96.69    7.70
  14  -4  -1   93.19    6.30
 -14  -4   1   87.89    6.60
 -14   4   1   97.59    5.10
 -14   4   1   94.39    8.80
 -14   4   1   93.89    5.60
 -12  -4   1  159.28   15.50
 -12  -4   1  144.99    7.30
 -12  -4   1  134.69    7.80
  12  -4  -1  136.89    5.50
  12  -4  -1  121.79    6.90
  12  -4  -1  138.59    7.50
 -12  -4   1  124.39    8.30
 -12   4   1  138.89    5.80
  12   4  -1  130.29    6.50
  12   4  -1  134.09    6.20
 -12   4   1  123.79    9.30
 -12   4   1  134.89    6.90
 -10  -4   1    4.60    2.60
 -10  -4   1    5.90    2.10
  10  -4  -1    9.10    2.60
 -10  -4   1    5.00    1.60
 -10  -4   1    8.10    3.60
  10  -4  -1    5.60    2.00
  10  -4  -1   10.70    3.30
  10  -4  -1    7.30    1.40
  10   4  -1    3.40    1.50
  10   4  -1    7.30    2.20
 -10   4   1    9.60    2.60
 -10   4   1    0.40    2.50
 -10   4   1    7.70    2.30
 -10   4   1    7.30    1.50
  10   4  -1    3.40    1.40
  10   4  -1    5.80    1.90
  -8  -4   1   20.40    3.10
  -8  -4   1   19.40    4.10
   8  -4  -1   16.30    1.40
  -8  -4   1   17.30    5.60
   8  -4  -1   17.10    3.90
   8  -4  -1   20.00    3.30
   8  -4  -1   15.70    2.90
  -8  -4   1   18.90    3.50
  -8   4   1   16.30    3.40
   8   4  -1   15.20    2.90
  -8   4   1   16.70    1.50
  -8   4   1   22.60    5.00
   8   4  -1   17.90    2.60
  -8   4   1   17.20    3.10
   8   4  -1   25.40    4.50
   6  -4  -1   14.30    2.80
   6  -4  -1   11.30    3.30
   6  -4  -1   18.40    3.20
  -6  -4   1   16.60    4.50
  -6  -4   1   12.30    3.40
  -6  -4   1   15.20    2.90
  -6  -4   1   15.10    3.40
  -6  -4   1   12.50    2.00
   6   4  -1   14.30    2.40
   6   4  -1   18.00    3.10
   6   4  -1   12.20    2.80
  -6   4   1   11.80    2.60
  -6   4   1   10.40    3.70
   4  -4  -1  346.77   13.10
  -4  -4   1  350.56   11.00
   4  -4  -1  334.67   12.10
  -4  -4   1  318.77   12.80
   4  -4  -1  341.37   10.30
  -4  -4   1  338.97   16.80
  -4  -4   1  347.67   13.50
  -4  -4   1  330.17   11.90
  -4   4   1  344.97   10.20
  -4   4   1  322.37   15.00
  -4   4   1  338.47   12.10
   4   4  -1  328.97   12.60
   4   4  -1  338.07   11.50
   4   4  -1  344.37   18.30
   4   4  -1  337.47   12.60
  -4   4   1  319.27   12.70
   2  -4  -1    3.80    1.30
  -2  -4   1    2.90    1.60
  -2  -4   1    5.90    3.30
   2  -4  -1    6.70    2.70
  -2  -4   1    4.50    1.70
   2  -4  -1    2.90    1.50
  -2  -4   1    4.60    2.10
   2   4  -1    3.30    1.90
  -2   4   1    4.50    1.10
   2   4  -1    4.00    1.60
   2   4  -1    4.10    3.50
   2   4  -1    3.60    1.30
  -2   4   1    0.80    1.30
  -2   4   1    5.10    2.00
  -2   4   1    4.80    3.00
   0  -4  -1 1290.67   34.00
   0  -4  -1 1222.58   40.30
   0  -4  -1 1302.67   35.90
   0  -4   1 1327.87   38.70
   0  -4  -1 1287.17   37.00
   0  -4   1 1345.17   36.00
   0   4  -1 1240.78   37.20
   0   4   1 1318.47   37.00
   0   4   1 1334.77   43.00
   0   4   1 1275.47   38.20
   0   4  -1 1283.47   35.40
   0   4   1 1248.08   35.50
   2  -4   1   31.50    4.00
   2  -4   1   33.70    4.00
   2  -4   1   33.10    2.60
  -2  -4  -1   36.10    3.40
   2  -4   1   33.80    4.20
  -2  -4  -1   49.80    7.70
  -2  -4  -1   34.30    2.10
  -2  -4  -1   35.00    3.00
  -2   4  -1   33.10    5.50
  -2   4  -1   31.60    2.20
  -2   4  -1   37.10    3.50
   2   4   1   37.60    3.30
  -2   4  -1   30.60    3.10
   2   4   1   37.60    7.40
   2   4   1   30.10    2.60
   2   4   1   34.00    1.90
  -2   4  -1   28.40    3.00
   2   4   1   35.70    3.90
  -4  -4  -1  171.88   11.70
   4  -4   1  173.38    8.90
   4  -4   1  184.08    6.10
  -4  -4  -1  185.88    8.50
  -4  -4  -1  180.78    6.50
   4  -4   1  167.38    9.00
   4  -4   1  184.08    6.60
   4   4   1  176.78    8.10
  -4   4  -1  181.88   11.00
   4   4   1  189.38    7.60
  -4   4  -1  163.28    8.20
   4   4   1  178.98    6.30
  -4   4  -1  187.78    8.20
   4   4   1  178.18    9.20
  -6  -4  -1  694.43   29.00
   6  -4   1  705.73   20.30
   6  -4   1  716.13   23.60
   6  -4   1  714.13   24.00
   6  -4   1  729.73   24.50
  -6  -4  -1  745.03   22.90
  -6  -4  -1  708.03   21.20
   6  -4   1  733.43   20.30
  -6  -4  -1  701.03   23.60
   6   4   1  715.93   23.70
  -6   4  -1  709.13   23.10
   6   4   1  736.93   20.80
  -6   4  -1  756.42   27.10
   6   4   1  719.43   24.30
   6   4   1  696.53   23.00
   6   4   1  735.03   22.20
  -6   4  -1  723.33   23.10
  -8  -4  -1 1065.69   31.20
  -8  -4  -1 1162.58   45.90
  -8  -4  -1 1082.09   32.70
   8  -4   1 1083.49   33.80
   8  -4   1 1117.59   29.60
   8  -4   1 1064.39   30.00
   8  -4   1 1094.79   34.20
  -8  -4  -1 1047.60   33.70
   8   4   1 1104.59   33.30
   8   4   1 1077.49   32.00
  -8   4  -1 1087.39   30.30
  -8   4  -1 1102.49   37.20
  -8   4  -1 1090.59   32.80
   8   4   1 1069.79   33.60
   8   4   1 1062.09   30.70
  -8   4  -1 1073.09   33.20
  10  -4   1  157.68    6.20
 -10  -4  -1  163.88    8.40
 -10  -4  -1  154.28    9.20
  10  -4   1  151.58    9.50
 -10  -4  -1  152.88    7.20
  10  -4   1  160.08    8.80
  10  -4   1  162.38    9.80
 -10   4  -1  168.98    6.70
 -10   4  -1  157.98    8.00
 -10   4  -1  147.99    8.30
 -10   4  -1  146.69   10.70
  10   4   1  171.08    8.70
  10   4   1  150.18    6.70
  10   4   1  129.99    7.90
  10   4   1  146.59    7.40
 -12  -4  -1  353.86   13.30
  12  -4   1  349.77   16.30
 -12  -4  -1  340.27   14.10
  12  -4   1  354.76   14.60
  12  -4   1  348.37   11.70
 -12  -4  -1  346.57   15.80
 -12   4  -1  347.77   12.20
  12   4   1  345.37   14.30
 -12   4  -1  349.87   18.10
 -12   4  -1  356.56   13.80
  12   4   1  342.07   14.40
 -14  -4  -1   40.10    7.00
 -14  -4  -1   37.10    4.20
 -14  -4  -1   39.70    5.70
  14  -4   1   45.50    4.90
  14  -4   1   41.40    7.40
 -14   4  -1   45.80    4.40
 -14   4  -1   40.20    3.70
  14   4   1   37.10    4.60
  14   4   1   41.00    4.70
 -14   4  -1   36.80    7.40
  16  -4   1  192.48   10.30
 -16  -4  -1  206.18   12.50
 -16  -4  -1  198.78   12.70
 -16  -4  -1  195.38   10.60
 -16  -4  -1  197.18   10.00
  16   4   1  227.88   10.30
 -16   4  -1  180.88   14.00
 -16   4  -1  196.58    9.10
 -16   4  -1  195.28    9.60
  16   4   1  208.88   10.80
 -18  -4  -1  176.28   15.10
  18  -4   1  161.38    9.10
 -18  -4  -1  158.18    9.70
 -18   4  -1  172.58    8.70
  18   4   1  151.68    8.40
  18   4   1  164.18    9.90
 -20  -4  -1   26.10    4.90
 -20  -4  -1   25.80    4.70
 -20  -4  -1   37.90    8.60
 -20   4  -1   21.50    7.10
 -20   4  -1   24.00    3.90
  20   4   1   26.10    5.10
 -22  -4  -1    5.10    3.00
 -22  -4  -1    5.40    4.40
 -22   4  -1    4.10    5.60
  22   4   1   10.60    4.00
 -22   4  -1    6.00    2.70
 -23  -5   1    2.20    2.60
  23  -5  -1   -2.60    2.00
 -23  -5   1   -1.40    2.70
 -23  -5   1    0.30    3.90
 -23   5   1    0.90    4.50
  23   5  -1    1.60    2.40
 -21  -5   1   53.09    8.00
 -21  -5   1   52.69    7.30
  21  -5  -1   52.99    6.10
 -21  -5   1   51.99    9.40
 -21   5   1   44.00    9.50
  21   5  -1   55.99    5.00
 -21   5   1   58.69    5.10
 -19  -5   1   63.69    7.80
 -19  -5   1   77.59    7.30
  19  -5  -1   62.89    6.60
 -19  -5   1   61.39    6.20
  19   5  -1   72.69    5.30
 -19   5   1   92.49   13.80
 -19   5   1   69.69    5.10
 -17  -5   1   54.09    5.40
 -17  -5   1   52.99    6.00
 -17  -5   1   56.09    6.90
  17  -5  -1   53.19    9.70
 -17   5   1   55.39    9.80
 -17   5   1   48.70    4.60
  17   5  -1   55.69    4.50
  17   5  -1   66.09    4.50
 -17   5   1   58.99    4.30
 -15  -5   1  169.98    9.10
 -15  -5   1  145.19   10.40
 -15  -5   1  165.98    9.70
  15  -5  -1  166.58    6.80
  15  -5  -1  170.78    9.50
 -15   5   1  167.48    8.40
 -15   5   1  167.08    7.20
 -15   5   1  138.89   11.70
  15   5  -1  154.08    7.80
  15   5  -1  171.48    7.70
 -13  -5   1  213.08   11.00
 -13  -5   1  217.78   12.20
 -13  -5   1  240.88   10.50
 -13  -5   1  181.28   15.80
  13  -5  -1  234.58   11.00
  13  -5  -1  212.98    7.90
  13   5  -1  227.48    9.80
 -13   5   1  232.48   14.30
 -13   5   1  218.58   10.10
  13   5  -1  228.68    9.90
 -13   5   1  241.18    8.40
 -11  -5   1  231.78   11.00
  11  -5  -1  231.88   10.70
 -11  -5   1  242.18   17.00
  11  -5  -1  239.78    7.80
 -11  -5   1  228.88   11.90
 -11  -5   1  233.68   10.00
 -11   5   1  227.88   10.40
 -11   5   1  206.58   13.20
  11   5  -1  237.68    9.30
  11   5  -1  233.08   10.20
 -11   5   1  234.78    9.10
  -9  -5   1  909.01   26.40
  -9  -5   1  891.11   41.70
  -9  -5   1  858.41   27.70
   9  -5  -1  857.01   23.70
  -9  -5   1  892.31   29.30
   9  -5  -1  873.81   30.00
   9  -5  -1  883.61   27.60
   9  -5  -1  820.52   27.40
  -9   5   1  884.51   27.70
  -9   5   1  857.11   31.50
  -9   5   1  783.22   27.90
  -9   5   1  898.31   23.80
   9   5  -1  867.21   27.40
   9   5  -1  863.91   25.90
  -7  -5   1  175.38    9.50
  -7  -5   1  173.48    7.40
   7  -5  -1  187.48   10.60
  -7  -5   1  187.68   10.20
   7  -5  -1  171.48    8.40
  -7  -5   1  177.18   13.20
  -7  -5   1  190.58    9.00
  -7   5   1  168.18    8.70
  -7   5   1  172.68   11.30
   7   5  -1  170.68    7.80
   7   5  -1  171.28    8.60
   7   5  -1  171.58    8.80
   5  -5  -1  212.98    7.30
  -5  -5   1  195.78   13.30
   5  -5  -1  201.68    9.90
  -5  -5   1  223.38   10.40
  -5  -5   1  214.28    9.30
  -5  -5   1  199.88   10.60
  -5  -5   1  205.48    7.90
   5  -5  -1  216.18    9.50
   5   5  -1  195.18    9.40
   5   5  -1  205.88   10.70
  -5   5   1  211.98    7.10
  -5   5   1  210.28   10.00
   5   5  -1  212.48   15.20
  -5   5   1  210.48    9.30
  -5   5   1  215.58   12.90
  -3  -5   1  277.47   10.70
  -3  -5   1  270.47   12.60
   3  -5  -1  279.87    9.60
   3  -5  -1  266.07   12.40
   3  -5  -1  270.97   11.10
  -3   5   1  273.17   11.90
   3   5  -1  273.27   11.50
  -3   5   1  283.97    9.30
  -3   5   1  278.57   11.20
   3   5  -1  277.87   10.10
   3   5  -1  285.97   17.40
  -3   5   1  284.77   15.50
   3   5  -1  259.67   11.40
  -1  -5   1  488.05   15.70
   1  -5  -1  487.95   19.50
   1  -5  -1  465.85   16.50
  -1  -5   1  483.35   17.40
   1  -5  -1  458.45   15.10
  -1  -5   1  446.26   20.10
  -1  -5   1  495.65   18.40
  -1   5   1  470.55   17.40
  -1   5   1  449.86   14.60
   1   5  -1  455.05   16.90
   1   5  -1  468.95   15.00
   1   5  -1  469.05   22.70
  -1   5   1  483.75   22.20
   1   5  -1  453.05   16.60
  -1   5   1  488.65   16.60
  -1  -5  -1   92.29    5.10
  -1  -5  -1   92.39    3.60
   1  -5   1   87.49    4.80
   1  -5   1   92.49    7.30
  -1  -5  -1   82.79    7.50
  -1  -5  -1   89.79    6.50
   1  -5   1   92.79    6.20
   1  -5   1   99.69    7.00
  -1   5  -1   91.69    6.00
   1   5   1   86.29    5.50
  -1   5  -1   84.49    9.10
   1   5   1   90.49    9.40
  -1   5  -1   83.89    5.60
   1   5   1   87.59    4.70
  -1   5  -1   96.39    4.50
  -1   5  -1   91.89    5.40
   1   5   1   78.79    6.00
   3  -5   1   62.09    5.20
  -3  -5  -1   56.59    6.70
  -3  -5  -1   62.29    4.90
  -3  -5  -1   63.19    3.20
   3  -5   1   61.29    5.70
  -3  -5  -1   62.79    4.40
   3  -5   1   59.29    5.70
  -3   5  -1   61.59    3.40
  -3   5  -1   63.29    4.60
   3   5   1   59.59    3.90
  -3   5  -1   57.89    4.80
  -3   5  -1   59.29    7.30
   3   5   1   60.79    9.60
   3   5   1   51.19    4.90
   3   5   1   68.19    4.80
  -3   5  -1   63.09    4.60
   5  -5   1  395.46   12.50
   5  -5   1  376.26   17.60
  -5  -5  -1  378.96   14.30
  -5  -5  -1  399.06   12.60
   5  -5   1  412.66   15.80
   5  -5   1  379.96   11.80
  -5  -5  -1  381.96   15.20
   5  -5   1  389.66   16.20
   5   5   1  391.36   12.20
  -5   5  -1  402.06   15.20
  -5   5  -1  410.56   19.30
   5   5   1  381.66   15.60
   7  -5   1   40.00    4.60
   7  -5   1   47.60    5.10
  -7  -5  -1   42.30    3.30
  -7  -5  -1   48.30    4.90
   7  -5   1   43.40    2.60
  -7  -5  -1   37.80    4.10
  -7  -5  -1   80.99   13.00
   7  -5   1   50.19    2.90
   7  -5   1   39.50    4.50
  -7   5  -1   56.79    6.90
   7   5   1   38.90    2.90
   7   5   1   40.70    4.60
   7   5   1   39.40    3.60
  -7   5  -1   52.89    4.60
  -7   5  -1   33.70    3.80
   7   5   1   39.10    4.60
   7   5   1   41.60    4.00
  -9  -5  -1   37.70    3.50
   9  -5   1   44.00    2.60
   9  -5   1   40.50    2.70
  -9  -5  -1   57.89   11.30
  -9  -5  -1   36.70    4.30
   9  -5   1   46.00    5.00
   9  -5   1   35.20    5.50
  -9  -5  -1   44.00    6.50
   9   5   1   46.50    5.10
   9   5   1   38.50    4.60
  -9   5  -1   54.79    9.30
   9   5   1   38.00    3.00
  11  -5   1   21.80    2.20
 -11  -5  -1   20.00    3.70
 -11  -5  -1   29.80    5.20
  11  -5   1   27.30    5.10
  11  -5   1   22.00    4.20
 -11  -5  -1   29.70    4.30
 -11   5  -1   24.50    2.60
 -11   5  -1   27.90    7.40
 -11   5  -1   29.40    4.90
  11   5   1   29.50    5.00
  11   5   1   31.50    5.60
  13  -5   1   44.80    5.40
 -13  -5  -1   54.49    5.50
 -13  -5  -1   59.29    8.50
 -13  -5  -1   46.70    4.50
  13  -5   1   47.70    3.40
 -13   5  -1   49.90    4.90
 -13   5  -1   43.00    3.70
  13   5   1   48.80    5.30
 -13   5  -1   55.19    9.20
  15  -5   1    1.60    2.40
 -15  -5  -1    3.00    3.10
 -15  -5  -1   -0.50    2.00
 -15  -5  -1   -0.20    1.90
 -15   5  -1    0.10    3.80
  15   5   1   -0.90    2.50
 -15   5  -1    1.70    1.70
  15   5   1   -0.90    2.00
 -15   5  -1    1.90    2.00
 -17  -5  -1   -1.20    2.90
 -17  -5  -1    1.30    2.30
 -17  -5  -1    0.90    2.70
  17  -5   1    5.00    3.00
  17   5   1    1.50    2.90
  17   5   1    4.60    2.30
 -17   5  -1    1.40    1.90
 -17   5  -1   -4.70    3.70
 -17   5  -1    1.40    2.20
 -19  -5  -1  309.77   17.70
 -19  -5  -1  284.67   16.10
  19  -5   1  290.97   13.90
 -19  -5  -1  283.77   13.60
 -19   5  -1  293.87   12.30
 -19   5  -1  288.87   20.00
 -19   5  -1  264.07   12.30
  19   5   1  303.27   14.20
 -21  -5  -1    8.30    4.60
 -21  -5  -1   15.30    4.10
 -21  -5  -1    9.10    3.50
  21  -5   1   13.50    4.40
 -21   5  -1   11.00    3.70
  21   5   1    5.50    3.60
 -21   5  -1    8.30    6.70
 -23  -5  -1   18.30    5.80
 -23  -5  -1   13.60    4.00
 -23   5  -1   25.70    8.20
  23   5   1   28.80    5.70
 -23   5  -1   16.50    3.80
 -22  -6   1  212.88   12.40
 -22  -6   1  211.68   15.20
 -22  -6   1  230.88   13.40
  22  -6  -1  223.48   12.50
 -22   6   1  239.08   10.50
 -22   6   1  245.18   18.80
  20  -6  -1  174.28   10.70
 -20  -6   1  173.68   11.30
 -20  -6   1  176.78   10.60
 -20  -6   1  169.98   13.00
 -20   6   1  183.18   15.70
 -20   6   1  162.98    8.60
 -20   6   1  175.18    8.30
 -18  -6   1  395.96   16.60
  18  -6  -1  386.76   17.00
 -18  -6   1  423.86   21.60
 -18  -6   1  391.06   19.60
 -18   6   1  368.96   22.00
 -18   6   1  362.46   15.00
 -18   6   1  389.66   13.70
  18   6  -1  386.66   14.50
  16  -6  -1  172.78   12.20
 -16  -6   1  162.88   10.20
  16  -6  -1  152.38    6.50
 -16  -6   1  158.38    9.10
 -16  -6   1  146.39   11.00
 -16   6   1  157.28    6.90
 -16   6   1  154.68    8.70
 -16   6   1  152.48   13.10
  16   6  -1  160.18    7.70
 -14  -6   1   61.39    7.10
  14  -6  -1   58.09    6.90
 -14  -6   1   62.39    5.40
 -14  -6   1   64.79    6.30
  14  -6  -1   60.09    3.40
  14   6  -1   57.29    4.60
 -14   6   1   78.39   12.40
 -14   6   1   56.19    3.60
 -14   6   1   52.29    5.20
  14   6  -1   52.69    5.60
  12  -6  -1  809.82   27.20
  12  -6  -1  819.62   22.70
 -12  -6   1  802.82   29.20
 -12  -6   1  791.02   27.60
 -12  -6   1  802.82   25.90
 -12   6   1  852.71   23.00
  12   6  -1  799.52   26.50
 -12   6   1  759.02   32.10
  12   6  -1  814.82   26.60
 -12   6   1  794.42   26.80
 -10  -6   1 1142.09   50.69
 -10  -6   1 1209.68   34.90
  10  -6  -1 1191.68   36.50
  10  -6  -1 1198.98   31.60
 -10  -6   1 1118.59   36.50
  10   6  -1 1157.58   36.20
 -10   6   1 1149.29   36.50
 -10   6   1 1186.48   42.30
  -8  -6   1  274.47   10.40
  -8  -6   1  268.27   13.00
  -8  -6   1  246.08   11.60
   8  -6  -1  256.67   11.60
  -8  -6   1  249.48   17.20
   8   6  -1  236.48   11.40
  -8   6   1  255.37   15.50
  -8   6   1  250.67   11.70
  -6  -6   1  348.57   16.10
  -6  -6   1  336.67   13.70
  -6  -6   1  314.87   18.70
  -6  -6   1  335.37   11.80
   6  -6  -1  348.97   11.00
   6  -6  -1  346.87   13.80
   6  -6  -1  296.97   13.90
  -6  -6   1  337.57   14.90
  -6   6   1  343.37   10.60
  -6   6   1  318.77   14.00
   6   6  -1  297.37   13.60
   6   6  -1  352.96   21.80
   6   6  -1  342.77   14.10
  -6   6   1  349.27   18.90
  -6   6   1  347.27   13.50
  -4  -6   1  416.46   17.30
   4  -6  -1  367.26   14.60
  -4  -6   1  374.36   14.20
  -4  -6   1  378.26   15.70
   4  -6  -1  383.96   16.20
  -4  -6   1  372.66   12.30
  -4   6   1  359.66   14.40
   4   6  -1  376.06   13.30
   4   6  -1  372.16   22.00
  -4   6   1  377.06   12.00
  -4   6   1  358.36   19.80
  -4   6   1  368.36   15.40
   4   6  -1  343.07   14.60
   4   6  -1  372.16   15.10
  -2  -6   1 1381.56   39.40
  -2  -6   1 1364.86   42.90
   2  -6  -1 1321.67   43.10
   2  -6  -1 1389.96   38.30
  -2  -6   1 1382.26   41.60
  -2  -6   1 1273.87   47.90
  -2   6   1 1369.86   48.40
  -2   6   1 1371.16   37.70
   2   6  -1 1307.57   40.60
  -2   6   1 1384.46   41.60
  -2   6   1 1332.77   40.20
   2   6  -1 1287.17   40.70
   0  -6   1 2065.29   64.59
   0  -6  -1 2075.79   64.39
   0  -6  -1 2133.09   55.29
   0  -6   1 2117.99   58.19
   0  -6   1 2111.89   60.99
   0  -6  -1 2110.09   58.09
   0  -6  -1 2138.69   59.99
   0   6  -1 2162.38   62.19
   0   6  -1 2103.19   57.29
   0   6  -1 2157.28   69.59
   0   6   1 2054.59   60.79
   0   6   1 2120.39   57.49
   0   6   1 2122.59   69.29
   0   6   1 2068.79   59.69
   0   6  -1 1990.50   60.19
  -2  -6  -1  269.07    8.60
   2  -6   1  269.77   13.40
  -2  -6  -1  262.57   10.70
   2  -6   1  258.97   12.30
  -2  -6  -1  276.57   15.50
   2  -6   1  267.97   10.10
   2  -6   1  233.98   13.10
  -2  -6  -1  273.57   12.00
   2   6   1  267.17   18.00
  -2   6  -1  262.77    9.40
   2   6   1  245.58   12.00
  -2   6  -1  249.38   11.80
  -2   6  -1  246.48   11.40
  -2   6  -1  256.17   17.00
  -2   6  -1  264.17   12.30
   4  -6   1    8.60    1.90
  -4  -6  -1   12.00    4.90
   4  -6   1    9.40    3.20
  -4  -6  -1    9.30    2.30
   4  -6   1   15.00    1.80
   4  -6   1   10.50    3.50
  -4  -6  -1   16.10    2.30
  -4  -6  -1   10.00    3.40
   4  -6   1   10.60    4.00
  -4   6  -1   14.60    2.20
  -4   6  -1   12.00    3.40
   4   6   1   10.90    2.60
  -4   6  -1    9.60    2.60
   4   6   1    8.20    3.10
   4   6   1   16.20    7.20
  -4   6  -1   14.50    6.40
  -6  -6  -1  656.03   23.80
   6  -6   1  674.83   19.10
  -6  -6  -1  689.13   20.30
   6  -6   1  669.63   25.10
  -6  -6  -1  683.83   22.80
   6  -6   1  735.23   22.20
   6  -6   1  685.83   24.20
  -6  -6  -1  635.14   30.60
  -6   6  -1  622.74   23.00
  -6   6  -1  624.04   28.50
   6   6   1  624.94   22.90
   6   6   1  689.63   24.10
  -6   6  -1  630.14   24.10
   6   6   1  677.03   19.80
  -8  -6  -1  847.02   25.60
   8  -6   1  843.72   30.00
   8  -6   1  849.22   29.30
   8  -6   1  896.91   24.20
  -8  -6  -1  852.11   29.30
   8  -6   1  886.41   24.40
  -8  -6  -1  825.02   27.80
   8   6   1  833.12   24.80
  -8   6  -1  849.12   34.30
  -8   6  -1  779.22   27.80
   8   6   1  796.72   28.50
   8   6   1  907.01   29.30
 -10  -6  -1  730.23   25.90
 -10  -6  -1  787.32   24.10
 -10  -6  -1  772.92   27.70
  10  -6   1  770.02   27.90
  10  -6   1  776.32   22.10
  10  -6   1  782.92   27.60
  10   6   1  744.13   26.50
 -10   6  -1  727.93   27.60
 -10   6  -1  718.73   31.70
  10   6   1  779.52   26.60
  12  -6   1  196.38   11.80
 -12  -6  -1  183.78   10.60
 -12  -6  -1  198.78    9.40
 -12  -6  -1  210.78   12.40
  12  -6   1  200.48    7.70
  12  -6   1  212.38   12.00
  12   6   1  203.78   10.90
 -12   6  -1  196.08   15.00
  12   6   1  196.58   10.80
  14  -6   1   17.50    5.20
  14  -6   1   19.20    5.10
 -14  -6  -1   13.00    3.90
 -14  -6  -1   14.00    4.50
 -14  -6  -1   12.20    2.80
  14   6   1   22.80    4.40
 -14   6  -1   19.60    7.10
 -14   6  -1   15.60    2.70
  14   6   1   18.10    4.20
 -16  -6  -1  189.28   10.10
 -16  -6  -1  174.88   10.80
 -16  -6  -1  169.08   12.30
  16  -6   1  185.08   11.80
  16  -6   1  174.08   11.20
 -16   6  -1  186.48    8.40
  16   6   1  171.88   10.20
 -18  -6  -1  535.25   22.20
 -18  -6  -1  573.94   21.30
  18  -6   1  526.65   23.20
 -18  -6  -1  551.54   25.20
  18  -6   1  566.64   22.70
  18   6   1  561.64   21.60
 -18   6  -1  579.54   19.20
 -18   6  -1  551.04   29.50
 -20  -6  -1  258.47   16.90
  20  -6   1  264.27   14.20
 -20  -6  -1  270.17   13.50
 -20  -6  -1  240.68   13.90
  20  -6   1  257.97   15.20
  20   6   1  239.18   14.20
  20   6   1  283.57   13.80
 -20   6  -1  249.18   20.00
 -20   6  -1  271.37   11.60
 -22  -6  -1   91.49    8.10
 -22  -6  -1   86.39   10.30
  22  -6   1   94.49    9.30
  22  -6   1   99.99    8.90
 -22  -6  -1   86.29    8.60
 -22   6  -1   95.69    6.80
 -22   6  -1  112.69   14.10
  22   6   1   94.29    8.00
  21  -7  -1  105.89    8.50
 -21  -7   1   97.49    9.30
 -21  -7   1  102.99   10.80
 -21  -7   1  103.19    8.40
 -21   7   1   96.79   12.70
 -21   7   1  117.29    6.50
  19  -7  -1   47.60    5.90
 -19  -7   1   48.30    9.20
 -19  -7   1   38.30    5.70
 -19  -7   1   55.29    7.90
 -19   7   1   49.70    4.00
  19   7  -1   40.40    5.30
 -19   7   1   48.00   11.60
  17  -7  -1  341.27   11.80
 -17  -7   1  361.66   19.10
  17  -7  -1  376.66   16.60
 -17  -7   1  346.57   17.00
 -17  -7   1  370.36   15.80
 -17   7   1  348.97   22.10
  17   7  -1  332.87   17.00
 -17   7   1  375.66   12.50
  17   7  -1  367.26   13.60
 -15  -7   1  333.07   14.40
 -15  -7   1  384.66   26.90
 -15  -7   1  349.87   16.30
  15  -7  -1  328.97   15.20
  15  -7  -1  326.37   10.90
 -15   7   1  329.27   20.80
  15   7  -1  325.77   12.90
 -13  -7   1   67.69    6.80
  13  -7  -1   73.69    3.50
 -13  -7   1   72.29    7.80
 -13  -7   1   79.39    6.00
  13  -7  -1   69.39    6.50
 -13   7   1   79.79   10.40
  13   7  -1   66.59    5.40
 -11  -7   1  298.27   12.10
 -11  -7   1  266.87   13.50
 -11  -7   1  285.47   15.00
  11  -7  -1  284.07   13.40
  11   7  -1  279.47   12.00
 -11   7   1  285.77   18.50
   9  -7  -1  166.28    9.50
  -9  -7   1  165.38    8.00
  -9  -7   1  153.38    9.40
  -9  -7   1  159.88   10.60
  -9   7   1  147.89   13.30
   9   7  -1  170.18    9.00
  -7  -7   1  406.76   17.80
   7  -7  -1  404.06   12.80
   7  -7  -1  394.66   16.20
  -7  -7   1  379.66   13.80
  -7  -7   1  386.66   16.00
  -7   7   1  393.76   22.30
   7   7  -1  430.96   26.40
  -7   7   1  390.76   12.30
  -5  -7   1  533.55   17.20
   5  -7  -1  557.64   17.20
  -5  -7   1  560.74   21.40
  -5  -7   1  506.65   22.60
   5  -7  -1  539.45   20.00
  -5  -7   1  530.25   19.50
  -5   7   1  536.15   16.50
  -5   7   1  515.85   26.60
  -5   7   1  535.35   19.80
   5   7  -1  550.04   29.70
  -3  -7   1  433.26   18.10
   3  -7  -1  441.16   14.80
  -3  -7   1  420.26   19.30
  -3  -7   1  421.56   16.10
   3  -7  -1  430.96   17.00
  -3  -7   1  430.56   13.90
  -3   7   1  401.36   23.30
   3   7  -1  469.65   26.20
  -3   7   1  414.66   16.60
   3   7  -1  422.66   16.10
  -3   7   1  427.56   14.10
   1  -7  -1  436.06   17.10
  -1  -7   1  447.06   15.90
   1  -7  -1  433.06   12.40
  -1  -7   1  440.76   19.60
   1  -7  -1  451.95   15.40
   1   7  -1  419.86   14.70
   1   7  -1  397.86   16.70
  -1   7   1  408.36   16.60
  -1   7   1  409.96   15.30
  -1   7   1  433.06   24.60
   1  -7   1 1505.45   49.99
  -1  -7  -1 1606.44   42.40
  -1  -7  -1 1573.94   45.60
   1  -7   1 1622.94   45.40
   1  -7   1 1604.94   48.70
  -1  -7  -1 1589.74   47.70
   1   7   1 1564.54   44.60
  -1   7  -1 1561.94   57.59
   1   7   1 1586.84   49.10
   1   7   1 1652.73   58.99
  -1   7  -1 1453.55   47.00
  -1   7  -1 1616.74   44.50
   3  -7   1  492.85   19.80
  -3  -7  -1  514.85   15.20
  -3  -7  -1  501.65   19.50
   3  -7   1  493.05   21.30
   3  -7   1  521.45   16.80
  -3  -7  -1  506.75   18.00
  -3   7  -1  509.25   16.00
   3   7   1  461.85   18.60
  -3   7  -1  465.85   18.40
   3   7   1  520.25   28.30
  -3   7  -1  445.26   18.00
  -5  -7  -1  883.11   24.90
   5  -7   1  837.32   25.30
   5  -7   1  806.12   30.70
  -5  -7  -1  809.52   27.50
   5  -7   1  825.52   23.60
   5  -7   1  858.21   29.60
  -5  -7  -1  845.52   29.10
  -5   7  -1  830.72   36.70
   5   7   1  868.01   40.00
  -7  -7  -1  840.72   25.00
   7  -7   1  811.92   30.60
   7  -7   1  866.21   29.70
  -7  -7  -1  825.72   27.90
   7  -7   1  829.12   23.40
   7  -7   1  834.22   24.50
  -7  -7  -1  810.92   29.10
  -7   7  -1  777.72   35.50
   9  -7   1 1032.90   34.90
  -9  -7  -1 1027.60   30.60
   9  -7   1 1013.70   28.50
  -9  -7  -1 1010.40   34.90
   9  -7   1  984.30   35.70
  -9  -7  -1  964.50   33.00
   9   7   1 1073.89   34.60
  -9   7  -1 1027.40   41.40
  11  -7   1  667.13   26.40
 -11  -7  -1  657.63   25.90
  11  -7   1  673.03   25.60
 -11  -7  -1  641.04   21.70
  11   7   1  635.94   24.20
 -11   7  -1  654.93   31.20
  13  -7   1  574.94   18.20
  13  -7   1  619.04   24.50
 -13  -7  -1  596.84   20.80
  13  -7   1  604.74   24.80
 -13  -7  -1  577.64   22.90
 -13  -7  -1  607.74   25.10
  13   7   1  594.14   22.60
 -13   7  -1  592.74   30.00
 -15  -7  -1   80.49    8.70
  15  -7   1   88.69    8.60
 -15  -7  -1   76.89    6.30
  15  -7   1   90.99    8.80
  15   7   1   79.19    7.30
 -15   7  -1   71.19   12.50
  17  -7   1  506.55   22.50
 -17  -7  -1  493.25   21.00
 -17  -7  -1  464.85   19.10
 -17  -7  -1  444.66   22.70
  17  -7   1  514.75   22.30
 -17   7  -1  458.75   27.60
  17   7   1  540.75   20.50
  19  -7   1  354.56   17.80
 -19  -7  -1  350.06   17.30
  19  -7   1  362.96   18.50
 -19  -7  -1  337.57   15.60
 -19  -7  -1  330.87   19.30
 -19   7  -1  332.47   23.80
  19   7   1  340.37   15.90
  21  -7   1  235.68   14.10
 -21  -7  -1  219.08   12.30
 -21  -7  -1  212.48   13.30
 -21  -7  -1  188.68   15.40
  21  -7   1  195.68   13.60
 -21   7  -1  201.18   19.10
  21   7   1  214.78   12.00
 -20  -8   1  314.77   15.20
 -20  -8   1  304.97   16.70
 -20  -8   1  325.37   19.10
  20  -8  -1  279.07   14.70
 -20   8   1  305.27   22.60
 -18  -8   1    5.10    2.80
 -18  -8   1    4.00    3.40
  18  -8  -1    5.70    2.70
 -18  -8   1    7.20    4.20
  18  -8  -1    5.30    1.90
 -18   8   1    1.50    5.40
 -16  -8   1   50.69    8.70
 -16  -8   1   65.79    9.10
  16  -8  -1   49.30    6.00
 -16  -8   1   49.80    5.60
 -16   8   1   43.50   10.30
 -14  -8   1   42.00    8.30
  14  -8  -1   42.80    6.80
 -14  -8   1   40.00    7.20
  14   8  -1   32.90    4.80
 -14   8   1   25.20   10.90
  12  -8  -1   70.99    6.60
 -12  -8   1   79.19    6.00
 -12  -8   1   64.49    6.90
 -12  -8   1   78.69    8.40
 -12   8   1   57.79   11.50
  12   8  -1   72.09    6.00
 -10  -8   1   42.00    4.40
 -10  -8   1   31.40    5.90
  10  -8  -1   36.00    5.90
 -10  -8   1   30.10    4.90
  10   8  -1   45.40    5.10
 -10   8   1   44.40   10.80
  -8  -8   1  112.89    8.30
   8  -8  -1  119.29    8.40
  -8  -8   1  114.39    6.60
  -8  -8   1  131.09    9.80
   8  -8  -1  120.09    5.80
  -8   8   1  123.89   13.70
  -8   8   1  122.59    5.20
   6  -8  -1   15.80    3.90
  -6  -8   1   16.20    3.00
   6  -8  -1   19.60    3.10
  -6  -8   1   14.50    4.30
  -6  -8   1   19.30    4.40
   6   8  -1   19.90    9.20
  -6   8   1   19.40    2.70
  -6   8   1   21.10    8.70
  -6   8   1   19.60    3.80
  -4  -8   1  433.76   14.30
  -4  -8   1  405.66   20.60
   4  -8  -1  435.76   17.60
  -4  -8   1  406.66   16.60
  -4  -8   1  411.86   18.50
   4  -8  -1  431.96   15.00
  -4   8   1  416.46   14.10
  -4   8   1  425.56   25.40
  -4   8   1  397.56   16.90
  -2  -8   1  119.09   10.40
  -2  -8   1  122.49    9.10
  -2  -8   1  124.59    7.80
  -2  -8   1  127.19    5.80
   2  -8  -1  114.19    6.70
   2  -8  -1  119.59    8.30
  -2   8   1  109.19    7.80
  -2   8   1  126.39    6.30
  -2   8   1  135.49   14.70
   2   8  -1  113.89   14.70
   0  -8  -1  276.77   11.70
   0  -8   1  259.37   11.60
   0  -8   1  274.77   15.70
   0  -8  -1  273.07   13.40
   0  -8  -1  290.17    8.80
   0  -8   1  261.87   13.80
   0   8   1  270.07   20.60
   0   8  -1  288.47   21.50
   0   8   1  246.28   10.60
   0   8   1  241.98   12.40
  -2  -8  -1  312.67   13.50
  -2  -8  -1  337.57   15.40
   2  -8   1  347.77   16.00
   2  -8   1  310.17   17.20
  -2  -8  -1  322.67   10.60
   2  -8   1  321.17   12.90
  -2   8  -1  281.87   21.40
   2   8   1  317.47   22.90
  -2   8  -1  322.57   11.80
  -4  -8  -1  394.06   16.10
   4  -8   1  395.46   14.40
  -4  -8  -1  395.86   17.60
  -4  -8  -1  397.86   13.10
   4  -8   1  373.26   19.30
   4  -8   1  427.46   18.40
  -4   8  -1  375.66   13.30
   4   8   1  413.06   26.90
  -4   8  -1  361.16   24.10
   6  -8   1  184.38   12.90
   6  -8   1  167.08   11.20
  -6  -8  -1  179.78   10.40
  -6  -8  -1  186.88   11.50
   6  -8   1  199.58    8.60
  -6  -8  -1  189.68    8.10
   6  -8   1  195.48    7.00
  -6   8  -1  206.88   17.50
  -8  -8  -1  841.82   28.90
   8  -8   1  814.82   30.40
   8  -8   1  828.92   23.60
  -8  -8  -1  834.52   30.40
   8  -8   1  812.12   32.00
   8  -8   1  838.82   25.00
  -8  -8  -1  821.82   25.60
   8   8   1  865.71   30.80
  -8   8  -1  796.42   38.10
  10  -8   1  164.58   11.00
 -10  -8  -1  136.19    7.70
  10  -8   1  147.19    6.60
 -10  -8  -1  153.78   11.00
 -10  -8  -1  152.28    9.90
  10  -8   1  162.48   12.10
  10  -8   1  152.68    6.20
  10   8   1  157.88   10.60
 -10   8  -1  150.28   15.20
  12  -8   1  367.36   19.30
 -12  -8  -1  373.16   17.30
 -12  -8  -1  381.66   14.80
  12  -8   1  359.46   12.20
  12  -8   1  382.86   18.40
 -12  -8  -1  351.06   18.30
  12   8   1  401.96   17.50
 -12   8  -1  361.76   23.90
 -14  -8  -1  244.78   11.70
  14  -8   1  251.87   15.70
  14  -8   1  255.17   14.70
 -14  -8  -1  252.37   13.80
 -14   8  -1  225.18   19.30
  14   8   1  237.68   13.10
  16  -8   1  138.19   10.80
 -16  -8  -1  111.89   10.80
 -16  -8  -1  117.19    8.20
  16  -8   1  122.29   10.90
 -16  -8  -1   98.29    9.00
 -16   8  -1  105.19   13.80
  16   8   1  124.29    9.10
  18  -8   1   63.39    9.90
  18  -8   1   73.19    8.50
 -18  -8  -1   63.49    6.60
 -18  -8  -1   65.59    9.70
 -18  -8  -1   51.99    8.80
 -18   8  -1   62.99   13.40
  18   8   1   66.79    7.00
  20  -8   1  158.48   12.10
 -20  -8  -1  156.58   10.30
  20  -8   1  164.88   12.90
 -20  -8  -1  151.38   13.40
 -20  -8  -1  153.18   11.80
  20   8   1  149.39   10.10
 -20   8  -1  165.58   18.20
  19  -9  -1  217.78   12.60
 -19  -9   1  227.38   12.60
 -19  -9   1  214.08   15.80
 -19  -9   1  214.38   14.00
 -19   9   1  218.78   19.90
  17  -9  -1   10.30    3.90
 -17  -9   1    5.50    4.40
 -17  -9   1    8.60    3.80
 -17  -9   1    7.00    3.80
 -17   9   1    9.20    7.00
 -15  -9   1  171.78   12.00
 -15  -9   1  190.28   10.70
  15  -9  -1  196.38   11.90
 -15  -9   1  194.98   14.10
  15   9  -1  197.78    9.80
 -15   9   1  191.88   18.60
 -13  -9   1   25.90    4.40
  13  -9  -1   37.10    6.80
 -13  -9   1   24.70    5.30
 -13  -9   1   37.80    7.80
  13   9  -1   37.20    5.30
 -13   9   1   35.10   10.20
 -11  -9   1    7.40    4.20
 -11  -9   1   17.50    3.70
  11  -9  -1   15.20    4.60
 -11  -9   1    9.70    4.40
  11   9  -1   10.90    3.70
 -11   9   1   11.90   13.10
   9  -9  -1  152.68    6.50
  -9  -9   1  145.59    8.00
  -9  -9   1  138.79    9.80
   9  -9  -1  147.59    9.80
  -9  -9   1  146.39   11.30
  -9   9   1  125.79   14.80
  -7  -9   1   10.80    3.70
   7  -9  -1    9.90    3.70
  -7  -9   1   12.90    3.10
  -7  -9   1    6.40    3.60
   7  -9  -1   12.30    2.70
  -7   9   1   23.40    8.70
  -7   9   1   11.90    2.00
   7   9  -1   10.60    7.20
  -5  -9   1  488.25   19.40
  -5  -9   1  482.95   21.50
  -5  -9   1  481.85   16.40
   5  -9  -1  492.45   16.90
   5  -9  -1  492.75   20.20
  -5   9   1  480.35   15.90
  -5   9   1  458.65   28.60
  -3  -9   1   64.79    6.20
   3  -9  -1   50.19    4.90
  -3  -9   1   66.49    7.20
   3  -9  -1   62.89    6.60
  -3  -9   1   62.49   10.80
  -3  -9   1   65.59    4.40
  -3   9   1   59.39    4.40
  -3   9   1   64.39   14.20
   3   9  -1   47.70   12.60
   1  -9  -1  216.28   10.50
   1  -9  -1  213.88   12.10
  -1  -9   1  187.88   14.20
  -1  -9   1  218.08    8.40
  -1  -9   1  220.08   11.00
  -1  -9   1  218.68   13.10
  -1   9   1  209.58   19.30
   1   9  -1  189.78   19.40
  -1  -9  -1  117.69    8.80
   1  -9   1   95.69   10.40
  -1  -9  -1  103.39    4.80
   1  -9   1  112.89    7.40
   1  -9   1  116.29    9.30
  -1  -9  -1  111.89    7.50
   1   9   1  128.79   15.80
  -1   9  -1   80.99   16.00
  -3  -9  -1    0.40    1.30
   3  -9   1    1.60    3.90
  -3  -9  -1    0.00    2.50
   3  -9   1    1.40    3.20
   3  -9   1    1.70    2.30
  -3  -9  -1    4.30    3.10
   3   9   1    1.10    5.50
  -3   9  -1   -0.40    6.20
   5  -9   1   78.99    8.20
   5  -9   1   92.99    6.10
   5  -9   1   94.79   10.20
  -5  -9  -1   92.29    5.20
  -5  -9  -1   81.39    8.10
  -5  -9  -1   85.59    7.20
   5  -9   1   99.39    4.40
  -5   9  -1   78.49   13.50
   5   9   1  120.39   19.70
  -5   9  -1   87.29    5.10
   7  -9   1   89.49    5.70
   7  -9   1   84.39    9.60
  -7  -9  -1   99.49    7.90
  -7  -9  -1   75.19    8.10
   7  -9   1   87.39    8.40
   7  -9   1   92.19    4.20
  -7  -9  -1   91.09    5.70
  -7   9  -1   76.59   14.40
   9  -9   1  196.58    7.30
  -9  -9  -1  199.58   11.80
   9  -9   1  188.58   12.50
  -9  -9  -1  212.08    9.40
   9  -9   1  193.28   14.30
   9  -9   1  191.88    8.40
  -9  -9  -1  189.18   12.60
  -9   9  -1  176.88   18.20
   9   9   1  187.28   12.60
 -11  -9  -1  165.38   12.20
 -11  -9  -1  159.78   10.90
  11  -9   1  142.09   12.70
  11  -9   1  135.39   10.90
 -11  -9  -1  163.58    8.70
  11   9   1  170.18   11.50
 -11   9  -1  148.09   16.60
  13  -9   1   27.60    8.00
 -13  -9  -1   22.10    5.80
  13  -9   1   23.90    2.60
  13  -9   1   27.20    6.60
 -13  -9  -1   14.30    4.20
 -13  -9  -1   24.00    4.10
 -13   9  -1   26.50   10.10
  13   9   1   29.80    6.00
  15  -9   1   35.90    7.00
 -15  -9  -1   36.80    7.40
  15  -9   1   36.20    8.00
 -15  -9  -1   31.60    7.50
 -15  -9  -1   33.40    5.00
 -15   9  -1   24.60    9.60
  15   9   1   26.20    5.60
  17  -9   1   -2.30    4.50
 -17  -9  -1    0.20    3.60
 -17  -9  -1    7.20    3.50
 -17  -9  -1    7.00    4.90
  17  -9   1    2.30    3.70
  17   9   1    2.40    3.20
 -17   9  -1    3.20    6.60
  16 -10  -1  209.68   12.70
 -16 -10   1  212.18   11.70
 -16 -10   1  207.08   15.30
 -16 -10   1  188.08   13.30
 -16  10   1  189.68   19.80
  14 -10  -1  125.09    9.50
 -14 -10   1  121.79   10.30
 -14 -10   1  113.39    8.20
 -14 -10   1  123.69   11.60
 -14  10   1  105.49   18.70
  14  10  -1  120.49    8.30
 -12 -10   1   27.40    6.10
  12 -10  -1   41.40    6.60
 -12 -10   1   31.30    7.00
 -12  10   1   26.70    9.20
  12  10  -1   47.60    5.70
 -10 -10   1    3.30    2.40
  10 -10  -1    0.70    2.40
 -10 -10   1    4.00    4.10
 -10 -10   1    2.70    4.40
  10  10  -1    0.60    3.40
 -10  10   1   -5.00    4.80
  -8 -10   1    1.50    3.00
  -8 -10   1    2.70    3.70
   8 -10  -1    0.40    1.70
  -8 -10   1    0.70    2.10
   8 -10  -1    2.80    2.90
   8  10  -1   14.10   10.40
  -8  10   1    4.40    6.40
  -6 -10   1    8.40    4.70
   6 -10  -1    7.60    2.60
  -6 -10   1   11.10    2.60
   6 -10  -1    5.60    3.80
  -6 -10   1    5.40    3.10
  -6  10   1    6.70    1.90
  -6  10   1    4.40    7.30
   6  10  -1    6.50    7.20
  -4 -10   1  855.51   26.10
   4 -10  -1  863.41   27.50
   4 -10  -1  859.81   31.20
  -4 -10   1  871.51   30.10
  -4 -10   1  854.11   32.80
  -4  10   1  806.82   42.90
  -2 -10   1   47.90    5.70
  -2 -10   1   40.10    9.60
  -2 -10   1   51.79    4.00
   2 -10  -1   51.09    6.40
  -2 -10   1   51.19    7.70
   2 -10  -1   58.09    5.60
   2  10  -1   28.60    9.70
  -2  10   1   33.60   12.00
   0 -10   1   18.60    6.40
   0 -10   1   13.80    3.70
   0 -10   1   19.00    2.90
   0 -10  -1   17.40    5.10
   0 -10  -1   24.10    4.70
   0 -10   1   22.10    6.90
   0  10   1    7.00    7.50
   0  10  -1    7.90    7.30
  -2 -10  -1   67.39    6.50
   2 -10   1   69.69    6.10
  -2 -10  -1   55.99    7.00
   2 -10   1   55.59    7.30
  -2 -10  -1   64.09    3.90
   2 -10   1   49.60   10.30
  -2  10  -1   53.69   14.80
   2  10   1   37.00   11.40
  -4 -10  -1  186.28   11.20
   4 -10   1  199.08   10.00
   4 -10   1  187.48   15.10
  -4 -10  -1  204.78   13.10
   4 -10   1  208.78   13.30
  -4 -10  -1  208.88    8.30
   4 -10   1  185.18    7.20
  -4  10  -1  181.68   19.90
   4  10   1  166.08   20.00
   6 -10   1  420.86   20.20
  -6 -10  -1  416.06   19.90
   6 -10   1  409.16   12.70
  -6 -10  -1  387.56   17.70
   6 -10   1  409.16   22.70
   6 -10   1  398.66   15.20
  -6 -10  -1  411.06   14.40
  -6  10  -1  353.56   28.60
   6  10   1  397.76   30.60
   8 -10   1  590.64   19.80
   8 -10   1  594.94   17.60
  -8 -10  -1  581.04   23.80
  -8 -10  -1  618.64   20.10
   8 -10   1  621.84   31.60
   8 -10   1  588.24   25.60
  -8 -10  -1  586.74   25.50
  -8  10  -1  541.65   34.50
  10 -10   1    4.60    1.90
 -10 -10  -1    4.70    2.60
 -10 -10  -1    1.60    3.00
  10 -10   1    4.60    5.80
  10 -10   1    3.80    1.70
  10 -10   1    6.10    3.80
 -10 -10  -1    5.90    4.30
  10  10   1    4.20    3.90
 -10  10  -1    7.10    7.30
  12 -10   1  110.29    9.90
  12 -10   1  106.19   11.70
 -12 -10  -1  100.19    9.20
  12 -10   1  104.49    5.00
 -12 -10  -1  105.79   10.60
 -12 -10  -1  104.99    7.20
  12  10   1  115.19    9.90
 -12  10  -1   83.79   17.40
 -14 -10  -1  231.28   11.40
  14 -10   1  197.68    8.70
  14 -10   1  210.08   14.20
 -14 -10  -1  202.28   13.50
  14 -10   1  233.58   16.80
 -14 -10  -1  214.28   15.30
  14  10   1  221.18   13.40
 -14  10  -1  201.28   21.00
 -16 -10  -1  117.29    8.50
 -16 -10  -1  114.79   10.40
  16 -10   1  124.09   12.80
 -16 -10  -1  120.89   12.00
  16 -10   1  125.49   11.00
 -16  10  -1   80.39   16.20
  16  10   1  124.59    9.80
  15 -11  -1  151.88   10.90
 -15 -11   1  137.79    9.40
 -15 -11   1  134.39   11.30
 -15 -11   1  146.39   13.30
  15  11  -1  150.78    9.50
 -15  11   1  120.39   20.90
 -13 -11   1  137.49   12.30
 -13 -11   1  127.99    8.70
  13 -11  -1  132.09   10.20
 -13 -11   1  135.39   11.20
 -13  11   1   95.79   17.00
  13  11  -1  141.89    9.60
  11 -11  -1   27.00    5.60
 -11 -11   1   24.50    5.70
 -11 -11   1   17.00    5.40
 -11 -11   1   23.80    4.40
  11  11  -1   29.70    5.80
 -11  11   1   25.30    9.80
   9 -11  -1   10.50    2.60
  -9 -11   1    9.60    3.00
   9 -11  -1   11.90    3.80
  -9 -11   1    9.80    5.50
  -9 -11   1    8.20    3.80
  -9  11   1    3.40    7.00
   7 -11  -1  252.17   10.70
   7 -11  -1  239.98   14.10
  -7 -11   1  236.48   15.40
  -7 -11   1  230.08   10.70
  -7 -11   1  247.68   14.10
   7  11  -1  221.98   44.50
  -7  11   1  241.88   23.60
  -5 -11   1   95.39    8.50
   5 -11  -1  103.69    9.10
  -5 -11   1  101.19    6.20
   5 -11  -1   89.99    6.60
  -5 -11   1   93.59   10.00
  -5  11   1   75.19   15.20
  -3 -11   1  280.17   14.40
  -3 -11   1  286.47   11.10
   3 -11  -1  264.87   12.70
  -3 -11   1  286.67   16.80
   3 -11  -1  274.47   15.30
   3  11  -1  312.17   40.20
  -3  11   1  273.17   25.20
  -1 -11   1  225.48   18.10
  -1 -11   1  266.67   13.40
  -1 -11   1  252.37    9.90
  -1 -11   1  281.17   16.20
   1 -11  -1  242.38   14.50
   1 -11  -1  252.87   12.60
  -1  11   1  237.38   23.60
   1 -11   1  176.78    7.50
  -1 -11  -1  180.98   10.70
  -1 -11  -1  175.88    6.90
  -1 -11  -1  167.88   12.10
   1 -11   1  176.08   12.90
   1 -11   1  152.98   15.00
   1 -11   1  166.48   10.10
   1  11   1  170.98   20.70
  -1  11  -1  155.88   20.70
   3 -11   1  138.79   11.70
  -3 -11  -1  167.38   12.10
   3 -11   1  150.38   14.90
   3 -11   1  145.39    9.10
  -3 -11  -1  150.68   10.30
  -3 -11  -1  159.78    7.00
  -3  11  -1  175.18   20.80
   3  11   1  170.58   20.70
   5 -11   1  525.35   24.60
   5 -11   1  529.55   28.60
  -5 -11  -1  600.84   23.20
  -5 -11  -1  559.54   24.90
   5 -11   1  549.35   20.30
  -5 -11  -1  599.04   18.50
   5 -11   1  562.14   17.10
   5  11   1  543.65   37.30
  -5  11  -1  516.25   35.30
   7 -11   1  273.27    9.20
   7 -11   1  247.98   15.80
   7 -11   1  289.77   20.00
  -7 -11  -1  283.17   16.60
   7 -11   1  256.27   11.60
  -7 -11  -1  252.47   14.40
  -7 -11  -1  262.97   11.00
  -7  11  -1  270.17   24.90
   9 -11   1  586.44   19.70
  -9 -11  -1  541.45   24.10
   9 -11   1  594.24   30.10
  -9 -11  -1  628.54   20.50
  -9 -11  -1  607.54   26.60
   9 -11   1  557.94   25.70
   9  11   1  605.14   26.60
  -9  11  -1  513.55   35.70
  11 -11   1  186.48   13.60
 -11 -11  -1  174.78   12.50
 -11 -11  -1  208.38   10.10
  11 -11   1  179.28   16.10
 -11 -11  -1  202.58   14.50
  11  11   1  173.88   12.90
 -11  11  -1  145.99   19.50
  13 -11   1   93.39    9.70
  13 -11   1   90.69   13.50
 -13 -11  -1   81.39    9.00
 -13 -11  -1   90.69   10.60
 -13 -11  -1   94.69    7.20
  13  11   1   98.39    9.70
 -13  11  -1   83.69   19.30
  12 -12  -1  204.88   13.50
 -12 -12   1  208.08   14.30
 -12 -12   1  208.18   15.70
 -12 -12   1  208.68   11.20
  12  12  -1  215.48   12.70
 -12  12   1  203.68   22.80
 -10 -12   1   16.50    5.30
 -10 -12   1   16.20    3.90
  10 -12  -1   26.50    5.90
 -10 -12   1   25.10    7.90
  10 -12  -1   25.40    3.40
  10  12  -1   32.70    7.00
 -10  12   1   21.40   10.40
   8 -12  -1   35.90    7.30
   8 -12  -1   42.00    4.60
  -8 -12   1   39.60    8.40
  -8 -12   1   37.50    6.50
  -8 -12   1   32.00    4.80
  -8  12   1   40.00   14.70
  -6 -12   1  298.97   16.20
   6 -12  -1  313.07   16.90
   6 -12  -1  299.57   13.00
  -6 -12   1  322.37   12.70
  -6 -12   1  293.07   18.00
   6  12  -1  291.97   29.50
  -6  12   1  266.37   26.70
   4 -12  -1  179.18   12.80
   4 -12  -1  207.88   10.70
  -4 -12   1  186.98   14.10
  -4 -12   1  198.68    9.10
  -4 -12   1  193.58   12.40
   4  12  -1  190.78   23.20
  -4  12   1  190.18   22.70
  -2 -12   1  238.08    9.80
   2 -12  -1  219.18   12.00
  -2 -12   1  218.78   16.00
   2 -12  -1  253.97   15.10
  -2 -12   1  252.97   13.60
  -2  12   1  197.98   23.00
   0 -12  -1   28.20    5.90
   0 -12  -1   13.90    5.40
   0 -12   1   21.70    6.10
   0 -12   1   24.40    3.30
   0 -12   1   13.20    5.00
   0  12  -1   21.80   11.40
   0  12   1   21.00   10.10
  -2 -12  -1    3.60    3.80
   2 -12   1    0.40    1.50
   2 -12   1    0.60    3.30
  -2 -12  -1    0.50    1.40
   2 -12   1    4.20    3.90
   2 -12   1    7.60    6.50
  -2 -12  -1   -1.80    2.10
  -2  12  -1   -5.80    6.70
   2  12   1   -4.10    8.50
   4 -12   1  653.23   18.90
   4 -12   1  570.04   32.10
   4 -12   1  630.04   22.90
   4 -12   1  623.24   18.70
  -4 -12  -1  632.84   27.40
  -4 -12  -1  613.84   24.80
  -4 -12  -1  619.84   19.50
   4 -12   1  627.64   27.80
   4  12   1  567.54   40.50
  -4  12  -1  570.64   39.60
   6 -12   1  351.96   19.60
  -6 -12  -1  393.76   18.60
   6 -12   1  356.66   24.40
  -6 -12  -1  374.06   20.40
  -6 -12  -1  372.76   13.60
   6 -12   1  353.66   15.20
  -6  12  -1  325.47   29.50
   8 -12   1   32.00    9.90
  -8 -12  -1   26.30    6.60
  -8 -12  -1   43.60    8.00
   8 -12   1   36.10    8.10
   8 -12   1   37.40    5.20
  -8 -12  -1   41.20    4.50
  -8  12  -1   26.40   11.20
  10 -12   1   68.69   12.70
 -10 -12  -1   78.89    9.90
  10 -12   1   85.39    9.80
 -10 -12  -1   80.69    8.90
  10 -12   1   79.99    5.80
 -10 -12  -1   81.49    6.30
 -10  12  -1   63.49   15.80
   7 -13  -1   25.20    4.40
  -7 -13   1   27.90    4.40
  -7 -13   1   33.70    7.30
   7 -13  -1   24.90    6.10
  -7 -13   1   23.80    6.80
   7  13  -1   16.60   11.00
  -7  13   1   13.60   10.80
   5 -13  -1   79.79    6.90
  -5 -13   1   84.19   10.20
  -5 -13   1   76.89    5.80
  -5 -13   1   74.19    8.60
   5 -13  -1   79.99    9.00
   5  13  -1   68.59   17.70
  -5  13   1   63.49   16.30
  -3 -13   1   23.60    6.10
   3 -13  -1   18.70    5.10
  -3 -13   1   28.30    7.30
  -3 -13   1   25.70    3.80
   3 -13  -1   25.50    6.70
  -3  13   1   21.60   12.90
   3  13  -1   31.70   11.80
  -1 -13   1    1.30    1.80
  -1 -13   1    5.30    4.20
   1 -13  -1    2.50    3.50
  -1 -13   1   -1.50    2.90
   1 -13  -1    0.40    3.30
  -1  13   1   -5.80    6.10
   1  13  -1    5.30    7.70
   1 -13   1    1.50    1.60
  -1 -13  -1   -4.20    2.60
  -1 -13  -1    3.70    4.50
   1 -13   1    4.50    4.80
   1 -13   1    2.00    3.40
  -1  13  -1   -4.40    7.00
   1  13   1    2.00    8.10
   3 -13   1   74.19    7.40
   3 -13   1   76.99    4.50
   3 -13   1   78.29   12.20
  -3 -13  -1   79.99    4.70
  -3 -13  -1   73.99    9.50
  -3 -13  -1   89.39    8.80
  -3  13  -1   80.99   21.10
   3  13   1   66.19   17.30
   5 -13   1    3.10    3.20
  -5 -13  -1    2.70    3.90
   5 -13   1    5.40    4.40
  -5 -13  -1    5.10    1.90
  -5 -13  -1    4.60    4.40
  -5  13  -1    0.40    5.90
   5  13   1   12.60   11.30
  -7 -13  -1   11.80    5.50
   7 -13   1    9.00    3.30
  -7 -13  -1    6.70    5.20
   7 -13   1   15.80    6.50
  -7 -13  -1   12.80    2.90
  -7  13  -1    6.10   10.50
  24   0  -2  146.89    7.00
 -24   0   2  172.48   10.10
 -24   0   2  181.88   13.70
 -22   0   2   96.79    9.70
 -22   0   2  111.39    7.70
 -22   0   2  106.79    5.90
  22   0  -2  112.39    5.40
 -20   0   2 1708.93   46.50
 -20   0   2 1688.83   53.29
 -20   0   2 1680.13   48.80
  20   0  -2 1528.85   47.10
 -18   0   2 1324.77   36.80
 -18   0   2 1252.57   38.20
 -18   0   2 1270.57   41.70
  18   0  -2 1287.07   35.90
 -18   0   2 1276.27   38.40
 -16   0   2  809.82   25.40
  16   0  -2  790.82   23.30
 -16   0   2  757.82   27.40
 -16   0   2  808.32   25.20
 -16   0   2  844.42   24.20
 -14   0   2  138.99    6.80
 -14   0   2  140.69    8.10
  14   0  -2  134.59    6.60
 -14   0   2  146.29    7.10
 -14   0   2  143.99    6.30
  14   0  -2  128.29    5.60
  12   0  -2  589.24   18.10
 -12   0   2  598.24   18.50
 -12   0   2  605.34   18.00
  12   0  -2  584.94   18.30
  12   0  -2  580.24   17.40
 -12   0   2  586.94   18.60
 -12   0   2  604.04   19.80
 -10   0   2 1950.80   54.29
  10   0  -2 1950.70   53.29
 -10   0   2 1973.10   53.09
 -10   0   2 2009.20   53.49
 -10   0   2 1995.20   53.79
  10   0  -2 1989.80   52.69
  -8   0   2 6522.15  170.08
   8   0  -2 6591.14  169.68
  -6   0   2    3.40    1.00
  -6   0   2    4.30    1.10
  -6   0   2    3.20    1.10
  -4   0   2  367.76   47.00
   4   0  -2  398.36   47.80
  -2   0   2   16.80    2.10
   0   0  -2 2791.22   74.09
   0   0   2 2797.62   73.99
   0   0   2 2760.82   74.49
   0   0  -2 2890.31   75.29
  -4   0  -2 1097.59   30.10
   4   0   2 1089.09   29.90
  -4   0  -2 1085.59   32.20
  -4   0  -2 1084.79   31.70
   4   0   2 1121.19   31.60
   4   0   2 1103.89   31.90
  -6   0  -2 1071.59   31.90
   6   0   2 1067.09   31.70
  -6   0  -2 1089.59   30.20
   6   0   2 1099.59   32.20
   6   0   2 1098.79   31.80
   6   0   2 1066.79   29.90
   8   0   2 1792.22   50.99
  -8   0  -2 1803.62   52.19
  -8   0  -2 1760.62   50.59
   8   0   2 1747.43   48.30
   8   0   2 1784.52   49.99
   8   0   2 1807.12   48.50
  -8   0  -2 1782.32   48.80
   8   0   2 1768.02   50.39
  10   0   2 4264.67  115.19
  10   0   2 4177.68  114.29
 -10   0  -2 4219.48  116.79
 -10   0  -2 4317.47  115.29
  10   0   2 4234.88  112.09
  10   0   2 4272.47  111.99
  12   0   2 1530.95   43.30
 -12   0  -2 1494.25   47.10
  12   0   2 1500.75   41.90
  12   0   2 1535.55   45.30
 -12   0  -2 1399.36   44.30
 -12   0  -2 1483.85   42.70
  14   0   2  714.43   23.20
 -14   0  -2  706.63   23.00
  14   0   2  699.43   25.30
  16   0   2  386.76   14.20
 -16   0  -2  355.66   18.50
  16   0   2  344.67   16.30
 -16   0  -2  356.96   14.30
  16   0   2  360.56   13.10
  18   0   2  505.15   17.40
  18   0   2  489.25   20.90
 -18   0  -2  479.35   18.40
 -18   0  -2  486.05   23.70
 -20   0  -2 1612.34   48.50
  20   0   2 1605.54   51.59
 -20   0  -2 1601.54   56.29
 -22   0  -2  478.85   19.90
 -22   0  -2  534.85   27.30
  22   0   2  525.65   26.30
  24   0   2   42.70    7.90
 -24   0  -2   40.90    6.30
 -24   0  -2   36.80    9.50
 -25  -1   2   42.00    8.60
 -25  -1   2   31.00    5.20
 -25   1   2   32.00    5.20
 -25   1   2   37.40    9.10
 -23  -1   2   57.79    6.00
 -23  -1   2   46.50    4.70
 -23  -1   2   50.49    8.90
 -23   1   2   58.39    5.80
 -23   1   2   50.89    8.80
 -21  -1   2  376.66   14.40
 -21  -1   2  388.66   15.30
 -21  -1   2  389.86   19.10
 -21  -1   2  385.86   16.00
 -21   1   2  378.26   20.00
 -21   1   2  378.76   15.40
 -19  -1   2  827.12   27.70
 -19  -1   2  918.11   31.50
 -19  -1   2  872.51   26.70
 -19   1   2  847.82   31.40
  19   1  -2  804.12   25.30
 -19   1   2  834.02   27.20
 -17  -1   2  433.36   15.10
 -17  -1   2  413.56   15.70
 -17  -1   2  403.26   14.90
 -17  -1   2  402.66   17.70
 -17   1   2  422.46   18.30
 -17   1   2  418.56   15.30
  17   1  -2  438.36   14.20
 -17   1   2  442.06   14.60
 -17   1   2  405.06   15.70
  15  -1  -2  301.47    9.40
  15  -1  -2  249.88   10.60
 -15  -1   2  294.37   11.20
 -15  -1   2  279.67   13.00
 -15  -1   2  294.07   11.80
 -15  -1   2  303.97   11.10
 -15   1   2  308.87    9.90
  15   1  -2  287.37   10.40
 -15   1   2  293.47   11.80
 -15   1   2  289.27   13.40
 -15   1   2  297.27   11.30
 -13  -1   2   67.59    4.40
  13  -1  -2   70.29    3.90
 -13  -1   2   68.99    4.10
 -13  -1   2   55.29    4.80
 -13  -1   2   61.89    4.40
 -13   1   2   62.59    4.20
 -13   1   2   63.69    5.10
  13   1  -2   64.49    3.80
 -13   1   2   62.29    4.40
 -13   1   2   64.29    3.40
  13   1  -2   57.89    4.10
  11  -1  -2  987.40   27.70
 -11  -1   2  998.10   27.70
  11  -1  -2  980.00   27.70
 -11  -1   2  998.10   28.80
 -11  -1   2  960.50   29.50
 -11  -1   2  974.90   28.40
 -11   1   2  969.80   29.50
 -11   1   2  975.60   28.80
  11   1  -2  966.20   27.80
 -11   1   2 1000.40   28.20
 -11   1   2 1005.90   27.10
  11   1  -2  962.00   28.50
  -9  -1   2 1874.71   49.90
  -9  -1   2 1868.21   51.59
   9  -1  -2 1874.51   49.90
  -9  -1   2 1927.81   51.19
   9   1  -2 1903.31   50.99
  -9   1   2 1834.92   50.39
  -9   1   2 1870.31   49.70
  -9   1   2 1869.61   51.39
   9   1  -2 1870.71   50.49
  -9   1   2 1870.91   51.29
  -7  -1   2  787.12   22.80
  -7  -1   2  787.32   23.10
  -7  -1   2  794.62   22.80
   7   1  -2  803.52   22.50
  -7   1   2  784.92   22.10
   7   1  -2  819.72   22.60
  -7   1   2  788.12   21.70
  -7   1   2  790.22   22.40
  -5  -1   2    3.90    1.30
  -5  -1   2    6.80    1.60
  -5  -1   2    4.20    2.40
  -5  -1   2    6.50    1.30
   5   1  -2    6.60    1.40
   5   1  -2    9.90    1.60
   5   1  -2    7.40    1.50
  -5   1   2    6.20    1.10
  -3  -1   2  525.05   17.40
  -3  -1   2  525.85   16.10
  -3  -1   2  555.64   15.50
  -3  -1   2  538.35   15.50
   3   1  -2  518.75   15.90
  -1  -1   2  398.66   13.20
  -1  -1   2  399.86   12.10
  -1  -1   2  417.36   13.50
   1   1  -2  409.96   13.90
  -1   1   2  411.86   11.60
   1   1  -2  413.16   13.10
   1   1  -2  412.26   12.20
   1  -1   2 2668.03   71.59
   1  -1   2 2756.02   71.79
  -1  -1  -2 2681.73   70.49
   1  -1   2 2607.84   70.79
  -1  -1  -2 2685.33   71.79
  -1   1  -2 2766.02   72.19
  -1   1  -2 2595.84   71.29
   1   1   2 2597.54   71.69
   1   1   2 2666.53   70.29
  -1   1  -2 2637.44   70.69
   3  -1   2  450.85   14.90
  -3  -1  -2  469.25   15.30
   3  -1   2  453.25   15.10
   3  -1   2  460.75   15.30
  -3  -1  -2  462.85   13.50
  -3  -1  -2  450.35   14.70
   3   1   2  460.55   14.50
   3   1   2  446.26   15.30
  -3   1  -2  450.65   14.70
   3   1   2  461.35   13.30
  -3   1  -2  476.35   16.00
  -3   1  -2  453.35   14.90
  -3   1  -2  471.55   13.60
  -5  -1  -2  381.16   13.50
   5  -1   2  372.56   13.20
   5  -1   2  371.76   11.50
   5  -1   2  382.16   13.60
  -5  -1  -2  356.06   13.20
   5   1   2  366.96   12.80
   5   1   2  370.76   11.50
   5   1   2  369.86   12.00
  -5   1  -2  365.56   13.10
  -5   1  -2  377.86   13.00
   5   1   2  389.56   14.80
  -5   1  -2  362.16   14.20
   7  -1   2  290.87   11.80
   7  -1   2  284.47    9.60
  -7  -1  -2  281.17   11.60
   7  -1   2  291.07   11.60
  -7  -1  -2  301.07   10.20
   7  -1   2  299.47   11.40
  -7   1  -2  300.17   10.10
   7   1   2  284.77   11.20
   7   1   2  285.77   10.10
   7   1   2  291.77    9.80
   7   1   2  297.17   11.90
  -7   1  -2  296.07   11.60
  -7   1  -2  292.77   12.90
  -9  -1  -2  926.71   27.00
   9  -1   2  921.81   28.80
   9  -1   2  938.51   29.40
   9  -1   2  923.51   26.30
  -9  -1  -2  929.21   29.00
   9  -1   2  897.41   26.30
  -9   1  -2  925.81   30.90
  -9   1  -2  900.61   28.70
   9   1   2  909.51   28.50
   9   1   2  889.51   27.20
   9   1   2  931.71   27.00
  -9   1  -2  938.51   26.90
   9   1   2  912.01   29.00
 -11  -1  -2  473.25   15.60
  11  -1   2  434.86   14.60
 -11  -1  -2  474.65   17.40
  11  -1   2  415.86   16.50
  11  -1   2  473.15   16.40
  11  -1   2  473.75   14.60
 -11  -1  -2  456.05   18.50
  11  -1   2  482.75   17.90
 -11   1  -2  454.25   17.00
  11   1   2  434.26   16.50
  11   1   2  404.26   14.60
  11   1   2  470.75   15.40
 -11   1  -2  459.55   19.30
  11   1   2  455.65   17.40
 -11   1  -2  444.66   15.30
  13  -1   2 1154.58   36.90
  13  -1   2 1150.38   32.70
  13  -1   2 1144.89   34.50
 -13  -1  -2 1141.49   38.20
 -13  -1  -2 1031.20   35.50
 -13  -1  -2 1128.79   34.00
  13   1   2 1169.28   33.60
  13   1   2 1162.88   34.50
 -13   1  -2 1188.88   34.10
  13   1   2 1131.39   36.30
 -13   1  -2 1179.28   39.50
  15  -1   2  408.36   13.80
 -15  -1  -2  390.06   15.10
  15  -1   2  404.36   15.20
  15  -1   2  404.96   17.70
 -15  -1  -2  407.86   19.10
  15   1   2  347.07   13.90
 -15   1  -2  416.36   19.90
 -15   1  -2  377.86   14.80
  15   1   2  412.36   15.20
  15   1   2  444.26   17.60
  17  -1   2  369.26   12.90
 -17  -1  -2  321.17   14.20
  17  -1   2  375.76   14.10
  17  -1   2  351.36   16.70
 -17  -1  -2  349.47   18.60
  17   1   2  351.16   16.30
  17   1   2  368.36   13.90
 -17   1  -2  347.87   19.10
 -17   1  -2  342.97   14.20
  19  -1   2  184.08    8.60
  19  -1   2  221.98   13.20
 -19   1  -2  187.28   18.00
 -19   1  -2  210.38   10.60
  19   1   2  211.28    9.50
  19   1   2  217.18   12.70
  21  -1   2  339.57   24.80
 -21  -1  -2  344.67   20.30
 -21  -1  -2  333.77   15.10
 -21   1  -2  323.67   14.70
 -21   1  -2  340.27   21.00
  21   1   2  312.47   16.50
 -23  -1  -2  212.48   16.50
 -23  -1  -2  198.38   11.60
  23  -1   2  183.18   13.40
  23   1   2  192.98   13.20
 -23   1  -2  210.28   11.50
 -23   1  -2  191.68   16.60
 -24  -2   2    4.30    4.00
 -24  -2   2   11.30    3.40
 -24  -2   2   12.80    4.00
 -24   2   2   14.00    6.20
 -24   2   2   10.20    3.60
 -22  -2   2   14.80    3.60
 -22  -2   2    8.50    4.10
 -22  -2   2   16.10    3.90
 -22  -2   2   20.40    3.70
 -22   2   2   14.70    3.40
 -22   2   2   16.80    5.80
 -20  -2   2   18.50    3.50
 -20  -2   2   16.30    3.90
 -20   2   2   11.10    2.90
 -20   2   2   22.40    6.40
 -18  -2   2   22.00    3.80
 -18  -2   2   15.10    3.50
 -18  -2   2   19.30    3.30
 -18  -2   2   22.90    5.40
 -18   2   2   16.50    3.10
 -18   2   2   17.60    5.20
 -16  -2   2   24.00    3.90
 -16  -2   2   26.50    5.60
 -16  -2   2   24.90    4.00
 -16  -2   2   31.80    3.30
 -16   2   2   30.70    5.70
 -16   2   2   25.60    4.20
 -16   2   2   27.10    3.80
  16   2  -2   19.40    2.90
  14  -2  -2    1.70    1.20
 -14  -2   2    3.00    2.30
 -14  -2   2    5.00    1.70
  14  -2  -2    3.20    1.50
 -14  -2   2    2.60    2.00
 -14  -2   2    2.30    1.90
 -14   2   2    1.40    1.50
 -14   2   2    3.50    1.80
  14   2  -2    3.40    1.40
 -14   2   2    1.70    2.00
 -12  -2   2    1.20    1.80
 -12  -2   2   -0.50    1.40
 -12  -2   2    0.50    1.30
  12  -2  -2    1.40    1.20
  12  -2  -2    1.40    0.90
 -12   2   2    2.50    1.50
 -12   2   2    0.50    1.50
  12   2  -2    2.00    1.20
  12   2  -2    2.20    1.20
 -12   2   2    0.00    1.00
 -10  -2   2  168.48    8.10
 -10  -2   2  170.38    7.60
  10  -2  -2  173.48    6.50
 -10  -2   2  165.28    7.40
  10  -2  -2  180.38    6.40
  10   2  -2  182.28    7.20
  10   2  -2  177.28    7.70
 -10   2   2  181.38    6.70
 -10   2   2  180.58    8.30
 -10   2   2  172.38    7.90
  -8  -2   2   43.70    3.40
  -8  -2   2   48.80    3.10
  -8  -2   2   46.40    6.00
  -8  -2   2   44.70    3.20
  -8  -2   2   49.50    3.80
  -8   2   2   51.29    4.10
  -8   2   2   47.60    3.30
   8   2  -2   47.70    3.40
   8   2  -2   48.30    3.10
  -8   2   2   48.00    2.60
   8   2  -2   50.09    3.30
  -6  -2   2  854.41   31.50
  -6  -2   2  862.51   24.50
  -6  -2   2  893.01   26.30
   6   2  -2  805.72   24.10
   6   2  -2  831.22   24.10
  -6   2   2  864.31   23.00
  -6   2   2  811.92   24.20
   6   2  -2  848.12   24.60
  -4  -2   2   75.49    4.10
  -4  -2   2   68.39    3.80
  -4  -2   2   71.49    4.20
  -4  -2   2   78.99    6.30
   4   2  -2   73.69    4.00
  -4   2   2   73.79    3.10
  -4   2   2   71.49    3.80
   4   2  -2   75.99    6.40
   4   2  -2   67.49    3.50
   4   2  -2   70.09    3.80
  -2  -2   2   57.09    3.20
  -2  -2   2   59.69    3.70
  -2  -2   2   59.59    4.00
  -2  -2   2   62.49    5.10
   2  -2  -2   64.39    3.50
  -2  -2   2   60.89    2.80
  -2   2   2   54.59    2.70
   2   2  -2   65.09    3.40
   2   2  -2   59.09    2.80
  -2   2   2   55.39    4.40
   2   2  -2   70.49    5.90
   2   2  -2   57.29    3.70
   0  -2  -2 1086.59   30.00
   0  -2  -2 1119.49   29.00
   0  -2   2 1141.69   32.90
   0  -2   2 1069.79   31.70
   0  -2   2 1121.59   31.10
   0  -2  -2 1072.69   32.70
   0  -2   2 1086.19   30.40
   0   2  -2 1099.89   30.30
   0   2  -2 1084.89   33.60
   0   2   2 1093.59   29.00
   0   2   2 1073.59   30.00
   0   2   2 1094.69   30.10
   0   2  -2 1097.29   31.50
   2  -2   2 1408.46   40.20
   2  -2   2 1423.76   39.40
  -2  -2  -2 1422.96   37.60
  -2  -2  -2 1357.56   38.80
  -2   2  -2 1399.66   39.80
  -2   2  -2 1410.96   39.10
   2   2   2 1391.16   38.80
  -2   2  -2 1460.15   41.80
   2   2   2 1396.86   38.50
   2   2   2 1403.46   40.70
   2   2   2 1434.86   37.50
  -4  -2  -2   39.70    3.30
  -4  -2  -2   34.10    3.60
  -4  -2  -2   36.60    2.40
   4  -2   2   34.50    2.20
   4  -2   2   40.50    3.70
   4  -2   2   39.60    3.70
   4   2   2   36.20    3.00
   4   2   2   34.90    2.20
   4   2   2   40.20    4.00
   4   2   2   37.70    2.80
  -4   2  -2   37.20    3.30
  -4   2  -2   37.00    3.30
  -4   2  -2   33.50    4.20
   6  -2   2  182.28    8.60
  -6  -2  -2  177.38    8.50
  -6  -2  -2  172.68    8.40
   6  -2   2  172.98    8.50
  -6  -2  -2  175.08    6.80
   6  -2   2  184.78    6.60
   6   2   2  182.78    7.90
  -6   2  -2  183.38    9.80
  -6   2  -2  178.88    6.80
  -6   2  -2  167.68    7.80
   6   2   2  169.88    8.60
  -6   2  -2  172.98    8.00
   6   2   2  164.98    6.50
   6   2   2  185.08    7.40
   8  -2   2   32.60    3.50
   8  -2   2   21.90    2.10
  -8  -2  -2   23.20    3.90
  -8  -2  -2   27.40    2.70
   8  -2   2   33.50    3.90
   8  -2   2   29.60    3.50
  -8  -2  -2   28.80    3.40
   8   2   2   34.70    4.00
   8   2   2   34.60    3.30
   8   2   2   24.10    2.20
  -8   2  -2   25.70    3.00
  -8   2  -2   31.40    3.40
  -8   2  -2   29.80    2.60
   8   2   2   27.00    2.70
  -8   2  -2   33.00    5.00
  10  -2   2    9.60    1.70
 -10  -2  -2   13.00    2.90
 -10  -2  -2   10.70    2.40
  10  -2   2   11.40    2.80
  10  -2   2    9.30    3.10
  10  -2   2   16.60    3.60
 -10  -2  -2   22.80    4.80
  10   2   2    9.80    1.70
  10   2   2   14.10    3.20
 -10   2  -2   10.80    2.10
  10   2   2   13.30    2.90
 -10   2  -2   12.30    2.60
 -10   2  -2    6.50    3.30
 -10   2  -2   13.10    3.00
  12  -2   2  336.87   12.90
  12  -2   2  375.06   12.10
  12  -2   2  362.66   14.30
  12  -2   2  359.26   15.70
 -12  -2  -2  367.06   16.40
 -12  -2  -2  346.47   14.90
 -12  -2  -2  362.36   13.50
  12   2   2  385.06   15.50
 -12   2  -2  380.46   13.30
 -12   2  -2  375.96   17.90
  12   2   2  352.96   13.20
  14  -2   2    2.10    2.80
  14  -2   2    2.30    2.30
  14  -2   2    0.30    1.00
 -14  -2  -2   -0.40    2.10
 -14  -2  -2    0.80    1.70
 -14   2  -2    0.30    2.70
  14   2   2    0.90    2.10
 -14   2  -2    1.90    1.60
 -16  -2  -2   56.89    5.20
  16  -2   2   52.19    7.40
  16  -2   2   47.00    4.90
  16  -2   2   52.19    3.70
 -16  -2  -2   52.89    6.90
 -16   2  -2   75.59   11.60
 -16   2  -2   44.30    4.40
  16   2   2   50.79    4.90
  16   2   2   56.19    6.20
  18  -2   2    6.30    3.70
  18  -2   2    6.30    2.60
 -18  -2  -2    6.20    2.80
 -18  -2  -2    5.20    4.20
  18   2   2    9.80    4.00
 -18   2  -2    9.40    3.10
  18   2   2    9.30    2.80
 -18   2  -2    9.30    4.70
  20  -2   2    6.70    2.80
 -20  -2  -2    5.00    4.30
  20  -2   2    6.20    1.90
 -20  -2  -2    3.20    2.40
  20  -2   2    3.80    3.90
 -20   2  -2    2.30    4.70
  20   2   2    6.70    3.70
 -20   2  -2    4.50    2.80
 -22  -2  -2   24.30    7.60
  22  -2   2   26.10    3.60
  22  -2   2   29.70    6.40
 -22  -2  -2   36.30    6.00
 -22   2  -2   44.00    6.50
  22   2   2   32.80    7.00
 -22   2  -2   20.70    6.90
  24  -2   2   25.30    7.00
 -24  -2  -2   37.00    6.30
 -24  -2  -2   27.90    8.70
 -24   2  -2   44.50   10.80
 -24   2  -2   34.00    6.10
  24   2   2   33.80    7.10
 -23  -3   2  174.38   10.70
 -23  -3   2  171.58    9.90
 -23  -3   2  164.78   12.70
 -23   3   2  187.58   14.40
 -23   3   2  170.58   10.60
 -21  -3   2  174.58   12.20
 -21  -3   2  168.18    9.80
 -21  -3   2  170.28    8.50
 -21  -3   2  164.88   10.00
 -21   3   2  179.98   13.30
 -21   3   2  174.28    9.00
 -19  -3   2   90.39    6.90
 -19  -3   2   82.49    8.00
 -19  -3   2   88.39    7.10
 -19   3   2   91.19    5.90
 -19   3   2   71.49    8.40
 -17  -3   2  107.69    7.20
 -17  -3   2  111.49    7.30
 -17  -3   2  104.99    8.40
 -17   3   2  104.19    6.00
 -17   3   2  101.39    8.80
  15  -3  -2 1418.56   40.40
 -15  -3   2 1401.56   41.60
  15  -3  -2 1361.56   38.80
 -15  -3   2 1378.26   41.30
 -15  -3   2 1343.17   43.30
 -15   3   2 1448.06   39.60
 -15   3   2 1421.56   44.80
  13  -3  -2  110.19    5.90
  13  -3  -2  120.09    5.70
  13  -3  -2  114.29    5.10
 -13  -3   2  116.19    6.60
 -13  -3   2  115.49    6.90
 -13  -3   2  115.99    7.60
 -13  -3   2  119.89   11.10
 -13   3   2  103.09    6.60
  13   3  -2  112.39    5.90
 -13   3   2  120.39    5.50
 -13   3   2  111.69    8.00
  11  -3  -2   32.00    2.20
  11  -3  -2   31.60    2.50
 -11  -3   2   36.80    7.60
  11  -3  -2   27.80    2.80
 -11  -3   2   23.10    3.50
 -11  -3   2   28.30    3.20
 -11  -3   2   28.30    3.80
 -11   3   2   28.30    2.40
 -11   3   2   26.40    2.80
  11   3  -2   27.30    2.70
  11   3  -2   29.90    3.20
 -11   3   2   33.20    5.10
  -9  -3   2   10.70    2.50
  -9  -3   2    9.00    2.30
   9  -3  -2   10.40    1.80
  -9  -3   2   16.40    5.10
  -9  -3   2   16.00    3.70
  -9  -3   2    9.80    1.90
  -9   3   2   18.90    3.10
  -9   3   2    8.40    1.40
   9   3  -2   10.00    1.80
  -9   3   2   13.80    3.00
   9   3  -2   10.10    2.20
   9   3  -2   13.70    2.40
  -7  -3   2  172.98    8.00
   7  -3  -2  168.18    6.20
  -7  -3   2  159.68    6.70
  -7  -3   2  169.28    7.50
  -7  -3   2  169.98    7.60
  -7  -3   2  150.98   10.80
   7   3  -2  160.38    7.40
  -7   3   2  167.08    5.40
  -7   3   2  175.08    8.10
   7   3  -2  156.68    6.90
  -7   3   2  160.88    7.60
   5  -3  -2  641.04   18.70
  -5  -3   2  631.34   24.50
  -5  -3   2  651.63   19.80
  -5  -3   2  637.04   20.50
  -5  -3   2  651.43   20.50
  -5   3   2  656.03   20.90
  -5   3   2  658.13   17.80
  -5   3   2  636.34   18.90
   5   3  -2  635.64   19.20
  -5   3   2  638.54   21.10
   5   3  -2  645.04   19.90
   5   3  -2  650.03   25.00
   5   3  -2  606.54   19.90
  -3  -3   2 1071.39   34.30
   3  -3  -2 1049.40   28.50
   3  -3  -2 1023.00   29.60
  -3  -3   2 1020.50   30.80
  -3  -3   2 1049.79   30.70
  -3  -3   2  982.70   29.40
  -3   3   2 1044.00   32.10
   3   3  -2 1022.90   30.00
   3   3  -2 1031.60   29.10
  -3   3   2 1056.39   29.00
   3   3  -2 1030.70   35.00
   3   3  -2 1064.39   28.10
  -3   3   2 1028.80   28.20
   3   3  -2  997.70   30.20
   1  -3  -2 3612.14   94.39
  -1  -3   2 3591.14   96.69
   1  -3  -2 3541.45   97.29
  -1  -3   2 3532.65   98.89
  -1  -3   2 3603.74   94.59
  -1   3   2 3662.13   99.39
   1   3  -2 3536.05   94.29
   1   3  -2 3620.84  100.59
   1   3  -2 3674.33   95.49
   1   3  -2 3561.04   94.29
   1   3  -2 3572.24   96.09
  -1   3   2 3558.94   94.09
  -1   3   2 3600.24   94.59
  -1  -3  -2   58.39    2.50
  -1  -3  -2   52.59    3.50
  -1  -3  -2   57.69    3.60
   1  -3   2   52.19    3.70
  -1  -3  -2   57.49    5.70
   1  -3   2   56.89    5.00
   1  -3   2   54.09    3.20
  -1   3  -2   62.29    6.20
   1   3   2   85.49   11.60
  -1   3  -2   48.60    3.40
   1   3   2   54.39    3.30
   1   3   2   54.09    3.50
  -1   3  -2   51.09    4.10
   1   3   2   54.39    2.40
  -3  -3  -2  139.19    5.30
  -3  -3  -2  148.09    6.60
   3  -3   2  134.99    7.80
   3  -3   2  161.78    7.40
   3  -3   2  149.19    7.80
   3  -3   2  153.58    5.50
  -3  -3  -2  139.59    6.70
  -3  -3  -2  135.89    9.60
   3   3   2  143.49    6.60
  -3   3  -2  133.99    9.80
   3   3   2  134.99    5.20
  -3   3  -2  145.29    6.70
   3   3   2  143.79    6.20
   3   3   2  177.98    8.60
  -3   3  -2  146.99    7.20
   5  -3   2 1438.96   43.60
  -5  -3  -2 1445.96   41.50
   5  -3   2 1508.55   43.30
  -5  -3  -2 1477.25   40.10
   5  -3   2 1485.95   39.80
   5  -3   2 1461.35   42.70
  -5   3  -2 1403.46   42.30
   5   3   2 1442.86   41.20
  -5   3  -2 1468.05   42.10
  -5   3  -2 1511.75   45.70
   5   3   2 1545.75   43.60
   5   3   2 1456.35   39.90
   7  -3   2  266.67    9.20
  -7  -3  -2  279.27   10.90
   7  -3   2  280.17   11.90
   7  -3   2  284.87   12.10
  -7  -3  -2  283.47   11.90
  -7  -3  -2  280.57    9.90
   7  -3   2  275.87   12.20
   7   3   2  280.37   10.50
  -7   3  -2  256.97   11.00
  -7   3  -2  271.77    9.60
   7   3   2  273.47    9.50
   7   3   2  265.67   11.90
  -7   3  -2  264.67   13.60
  -7   3  -2  274.97   11.30
   9  -3   2   15.70    3.70
   9  -3   2    8.50    2.70
  -9  -3  -2   15.80    3.00
   9  -3   2   12.00    1.80
  -9  -3  -2    9.10    3.00
  -9  -3  -2    8.90    2.90
   9  -3   2   15.60    3.80
  -9  -3  -2    8.20    1.80
  -9   3  -2   20.40    5.50
   9   3   2   10.70    2.40
  -9   3  -2   14.40    3.00
  -9   3  -2   16.00    3.50
   9   3   2   12.40    2.00
  -9   3  -2   10.90    2.00
   9   3   2   14.80    3.80
   9   3   2    9.60    2.10
 -11  -3  -2  163.18    8.50
  11  -3   2  164.48    6.90
 -11  -3  -2  169.78   10.00
 -11  -3  -2  164.08    7.80
  11  -3   2  171.88    9.10
 -11  -3  -2  159.28    9.10
  11  -3   2  181.78   10.20
 -11   3  -2  165.08    7.40
 -11   3  -2  160.08   11.40
 -11   3  -2  175.88    8.50
  11   3   2  175.78    9.60
  11   3   2  145.39    7.60
 -13  -3  -2 1547.85   45.70
  13  -3   2 1566.44   42.40
  13  -3   2 1483.85   48.00
  13  -3   2 1622.94   46.40
 -13  -3  -2 1539.45   48.70
 -13  -3  -2 1438.56   46.60
 -13  -3  -2 1550.44   44.80
 -13   3  -2 1523.25   45.20
  13   3   2 1635.94   47.40
 -13   3  -2 1523.15   44.00
 -13   3  -2 1563.64   51.69
  15  -3   2  831.42   30.30
 -15  -3  -2  818.22   26.70
  15  -3   2  837.02   27.50
  15  -3   2  854.91   24.20
 -15  -3  -2  823.32   30.80
 -15   3  -2  818.32   26.00
 -15   3  -2  762.12   32.60
  15   3   2  828.02   28.70
  17  -3   2  343.17   14.30
 -17  -3  -2  334.17   17.70
  17  -3   2  319.37   11.20
 -17  -3  -2  314.17   13.80
  17  -3   2  325.57   17.00
 -17   3  -2  322.47   19.30
  17   3   2  330.07   15.60
 -17   3  -2  321.37   13.30
 -19  -3  -2    1.90    2.10
  19  -3   2    5.30    2.70
  19  -3   2    5.90    1.70
 -19  -3  -2    3.90    3.60
  19  -3   2   -2.40    3.20
  19   3   2    3.60    2.40
 -19   3  -2    2.80    2.10
 -19   3  -2    2.90    4.20
  19   3   2    5.50    3.20
  21  -3   2   77.69    9.40
 -21  -3  -2   90.09    7.50
 -21  -3  -2   83.49   10.00
 -21   3  -2   77.69    6.70
  21   3   2   79.89    8.20
 -21   3  -2   86.89   11.10
  23  -3   2  136.29   12.40
 -23  -3  -2  135.69   13.20
 -23  -3  -2  141.89    9.90
 -23   3  -2  148.89    9.50
  23   3   2  118.49   17.90
 -23   3  -2  172.38   16.10
 -24  -4   2  307.77   15.30
 -24  -4   2  334.47   15.20
 -24  -4   2  284.07   17.90
 -24   4   2  314.27   13.40
 -24   4   2  282.77   19.20
 -22  -4   2  271.77   16.30
 -22  -4   2  284.27   13.80
  22  -4  -2  260.97   12.40
 -22  -4   2  278.27   13.70
 -22   4   2  262.17   11.70
 -22   4   2  243.48   17.00
  20  -4  -2  233.18   11.20
 -20  -4   2  231.18   12.00
 -20  -4   2  237.08   12.30
 -20  -4   2  237.98   14.30
 -20   4   2  225.18   10.20
 -20   4   2  219.88   15.20
 -18  -4   2  197.58   10.60
  18  -4  -2  210.48   10.00
 -18  -4   2  210.78   12.70
 -18  -4   2  193.38   10.80
 -18   4   2  195.38    8.70
 -18   4   2  191.88   13.30
  16  -4  -2 1246.48   35.70
 -16  -4   2 1284.57   41.60
 -16  -4   2 1256.67   38.80
 -16  -4   2 1284.87   39.60
 -16  -4   2 1222.08   49.70
  16  -4  -2 1318.87   38.30
 -16   4   2 1288.47   36.40
 -16   4   2 1301.67   43.40
  14  -4  -2  706.23   22.20
 -14  -4   2  680.33   22.70
 -14  -4   2  663.93   23.20
 -14  -4   2  677.13   24.80
 -14  -4   2  546.55   41.70
  14  -4  -2  686.83   20.00
 -14   4   2  682.33   21.40
 -14   4   2  705.83   20.50
 -14   4   2  683.13   26.10
 -12  -4   2  338.37   19.50
  12  -4  -2  306.27   11.10
  12  -4  -2  306.37   11.60
 -12  -4   2  314.77   13.00
 -12  -4   2  305.37   12.10
 -12  -4   2  284.37   13.40
  12  -4  -2  311.97    9.90
  12   4  -2  293.87   11.10
 -12   4   2  300.17   10.10
 -12   4   2  312.77   14.70
 -12   4   2  315.77   11.90
  10  -4  -2  185.08    7.90
  10  -4  -2  197.18    6.40
 -10  -4   2  193.48    9.90
  10  -4  -2  193.08    7.70
 -10  -4   2  195.68   13.90
 -10  -4   2  188.98    9.10
 -10  -4   2  186.28    8.30
 -10   4   2  187.68    9.40
  10   4  -2  184.38    8.20
 -10   4   2  195.88    6.60
  10   4  -2  163.08    8.60
 -10   4   2  195.28   10.50
 -10   4   2  187.58    8.70
  10   4  -2  176.48    8.00
  -8  -4   2  711.23   22.70
  -8  -4   2  719.13   21.30
  -8  -4   2  711.83   23.40
   8  -4  -2  680.43   20.90
  -8  -4   2  698.43   22.30
   8  -4  -2  688.63   20.80
  -8  -4   2  655.73   28.20
  -8   4   2  674.53   22.30
   8   4  -2  663.43   21.60
   8   4  -2  670.53   22.30
  -8   4   2  701.23   24.20
   8   4  -2  661.63   21.20
  -6  -4   2 1792.02   57.49
  -6  -4   2 1832.12   51.89
  -6  -4   2 1835.22   50.69
   6  -4  -2 1868.81   49.30
   6  -4  -2 1770.02   49.70
  -6  -4   2 1785.42   51.59
   6   4  -2 1842.72   58.79
  -6   4   2 1852.41   49.90
   6   4  -2 1716.33   49.60
  -6   4   2 1848.62   53.29
   6   4  -2 1747.93   50.49
  -6   4   2 1732.63   51.29
   6   4  -2 1797.22   50.99
  -4  -4   2 2346.97   65.59
  -4  -4   2 2276.47   69.99
  -4  -4   2 2375.26   63.99
   4  -4  -2 2380.06   62.99
  -4  -4   2 2408.66   65.49
   4  -4  -2 2316.57   64.19
   4   4  -2 2431.16   62.09
   4   4  -2 2269.67   71.49
   4   4  -2 2296.77   64.49
  -4   4   2 2365.16   67.99
  -4   4   2 2329.37   63.49
   4   4  -2 2268.67   64.49
  -4   4   2 2337.77   65.79
  -4   4   2 2333.17   61.89
  -2  -4   2   64.39    5.10
  -2  -4   2   60.89    4.00
   2  -4  -2   51.99    4.80
  -2  -4   2   63.09    4.80
  -2  -4   2   49.60    5.80
   2  -4  -2   58.79    3.70
   2  -4  -2   60.39    3.50
  -2   4   2   53.69    6.50
   2   4  -2   60.09    7.40
   2   4  -2   58.59    3.50
   2   4  -2   56.29    4.20
   2   4  -2   52.49    4.30
  -2   4   2   54.39    3.90
  -2   4   2   51.39    3.20
   2   4  -2   59.19    3.50
   0  -4   2    6.70    2.60
   0  -4  -2    5.00    2.70
   0  -4   2    6.70    1.80
   0  -4  -2    5.80    0.90
   0  -4  -2    7.40    1.90
   0  -4  -2    6.00    1.80
   0  -4   2    2.90    2.40
   0  -4   2    4.50    2.30
   0   4  -2    5.70    1.70
   0   4  -2    5.40    1.80
   0   4   2    5.50    1.70
   0   4   2    6.50    0.90
   0   4  -2    6.20    1.30
   0   4   2    6.50    1.50
   0   4  -2    4.70    1.60
   0   4   2    9.60    4.60
  -2  -4  -2 1092.09   37.90
  -2  -4  -2 1115.79   33.20
  -2  -4  -2 1143.69   32.80
   2  -4   2 1124.89   33.80
   2  -4   2 1113.89   36.00
   2  -4   2 1144.89   34.70
   2  -4   2 1170.28   32.30
  -2  -4  -2 1126.29   30.70
  -2   4  -2 1136.79   33.10
   2   4   2 1126.49   40.30
  -2   4  -2 1211.68   39.30
   2   4   2 1109.39   33.20
   2   4   2 1153.78   30.60
  -2   4  -2 1126.39   34.20
   2   4   2 1150.38   32.50
  -4  -4  -2 2267.47   66.29
   4  -4   2 2461.85   65.89
   4  -4   2 2248.38   66.69
   4  -4   2 2304.17   61.79
  -4  -4  -2 2260.87   70.89
   4  -4   2 2349.67   66.29
  -4  -4  -2 2332.07   63.99
   4  -4   2 2397.66   65.59
   4  -4   2 2313.67   63.39
   4   4   2 2306.37   64.49
   4   4   2 2446.66   66.89
   4   4   2 2276.67   63.49
  -4   4  -2 2348.17   65.19
   4   4   2 2344.67   61.79
  -4   4  -2 2336.97   69.69
  -4   4  -2 2317.17   64.39
   6  -4   2 1353.46   41.60
  -6  -4  -2 1375.86   38.00
   6  -4   2 1385.66   37.70
   6  -4   2 1396.86   41.60
  -6  -4  -2 1379.96   40.90
  -6  -4  -2 1362.86   39.80
   6  -4   2 1349.96   37.50
   6  -4   2 1427.86   46.20
   6   4   2 1350.56   40.40
   6   4   2 1352.56   37.70
  -6   4  -2 1361.76   40.60
   6   4   2 1358.26   41.70
   8  -4   2  253.57   11.80
  -8  -4  -2  248.28   10.70
   8  -4   2  233.58   11.70
  -8  -4  -2  245.18    9.30
   8  -4   2  245.68    8.60
   8  -4   2  229.78   11.60
  -8  -4  -2  227.18   15.50
  -8  -4  -2  226.88   11.20
   8   4   2  247.28   11.80
  -8   4  -2  238.18   10.90
  -8   4  -2  242.58   10.90
   8   4   2  229.98    9.20
   8   4   2  236.58    9.90
  -8   4  -2  209.38   13.20
  10  -4   2   69.09    6.10
 -10  -4  -2   61.49    4.40
 -10  -4  -2   68.49    6.20
 -10  -4  -2   58.19    5.20
  10  -4   2   63.09    3.80
  10  -4   2   73.09    6.70
 -10   4  -2   60.39    4.10
  10   4   2   72.99    6.40
 -10   4  -2   62.59    7.50
 -12  -4  -2 1340.27   42.60
  12  -4   2 1268.47   38.10
  12  -4   2 1287.17   42.60
 -12  -4  -2 1330.97   40.20
 -12  -4  -2 1319.77   38.80
  12  -4   2 1338.67   41.30
 -12   4  -2 1339.37   46.30
 -12   4  -2 1306.27   39.90
  12   4   2 1317.17   41.30
 -12   4  -2 1342.77   38.00
 -14  -4  -2 1181.38   40.20
 -14  -4  -2 1189.68   37.30
  14  -4   2 1169.08   40.20
  14  -4   2 1208.38   37.90
 -14  -4  -2 1194.48   36.00
  14  -4   2 1207.08   33.00
  14   4   2 1208.38   38.30
 -14   4  -2 1193.68   35.10
 -14   4  -2 1188.18   43.70
 -14   4  -2 1105.49   36.20
 -16  -4  -2  443.16   21.20
  16  -4   2  491.25   19.00
 -16  -4  -2  474.05   18.70
  16  -4   2  477.85   21.80
 -16  -4  -2  491.55   18.00
 -16   4  -2  452.55   16.70
 -16   4  -2  440.36   17.60
  16   4   2  473.45   19.50
 -16   4  -2  455.75   24.00
 -18  -4  -2  264.67   20.20
  18  -4   2  299.77   19.10
 -18  -4  -2  324.27   14.10
  18  -4   2  301.67   14.10
  18   4   2  292.67   15.00
 -18   4  -2  324.27   13.10
 -18   4  -2  293.07   19.50
  20  -4   2  133.79    8.50
 -20  -4  -2  116.69    8.50
 -20  -4  -2  103.79   10.70
  20  -4   2  102.59   10.50
  20   4   2  112.19    8.10
  20   4   2  125.39    7.80
  20   4   2  127.79    9.60
 -20   4  -2  108.69   12.60
 -22  -4  -2  255.97   13.50
 -22  -4  -2  245.48   17.40
 -22   4  -2  272.77   12.80
 -22   4  -2  252.37   19.70
  22   4   2  255.27   14.40
  23  -5  -2   81.49    6.60
 -23  -5   2   95.69    8.40
 -23  -5   2   86.79    7.90
 -23  -5   2   76.49    9.30
 -23   5   2   88.09   11.40
 -23   5   2   88.59    6.30
 -21  -5   2   78.19    8.80
  21  -5  -2   68.29    5.80
 -21  -5   2   61.69    7.00
 -21  -5   2   62.49    6.70
 -21   5   2   73.09   12.10
 -21   5   2   73.19    5.40
 -19  -5   2  560.54   22.00
 -19  -5   2  539.05   23.90
 -19  -5   2  552.84   21.30
  19  -5  -2  559.84   20.30
 -19   5   2  590.74   18.70
 -19   5   2  531.55   29.20
 -17  -5   2  408.06   17.60
  17  -5  -2  397.56   13.70
 -17  -5   2  440.16   19.70
 -17  -5   2  416.36   16.90
  17  -5  -2  449.36   16.50
 -17   5   2  442.76   14.50
 -17   5   2  420.06   15.30
 -17   5   2  443.36   21.70
  15  -5  -2    3.80    1.30
 -15  -5   2    3.10    2.60
  15  -5  -2    2.50    2.10
 -15  -5   2    3.10    2.50
 -15  -5   2    0.20    2.10
  15   5  -2    4.00    2.00
 -15   5   2    2.90    1.30
 -15   5   2    1.40    1.90
 -15   5   2   -2.90    2.70
  13  -5  -2  613.84   18.10
 -13  -5   2  635.34   23.80
 -13  -5   2  571.54   29.40
  13  -5  -2  635.14   20.90
 -13  -5   2  600.14   22.20
 -13  -5   2  616.74   21.30
 -13   5   2  648.64   18.50
  13   5  -2  633.14   20.60
 -13   5   2  641.14   21.30
 -13   5   2  653.13   25.80
  11  -5  -2  754.22   20.60
  11  -5  -2  708.33   23.00
  11  -5  -2  748.73   23.50
 -11  -5   2  734.23   26.30
 -11  -5   2  741.53   25.10
 -11   5   2  731.43   27.90
  11   5  -2  745.53   23.70
 -11   5   2  761.42   20.80
 -11   5   2  725.03   24.30
   9  -5  -2  697.43   22.50
  -9  -5   2  624.84   22.50
  -9  -5   2  677.73   21.50
  -9  -5   2  660.03   29.80
  -9  -5   2  670.03   24.00
   9  -5  -2  682.93   21.50
  -9  -5   2  707.43   24.00
   9   5  -2  670.23   22.20
  -9   5   2  666.83   22.80
  -9   5   2  688.03   25.90
   7  -5  -2 1114.39   34.20
  -7  -5   2 1183.98   33.50
  -7  -5   2 1123.49   34.80
  -7  -5   2 1189.18   36.50
   7  -5  -2 1211.18   33.90
  -7  -5   2 1215.88   36.60
  -7  -5   2 1128.59   42.30
  -7   5   2 1136.79   35.60
  -7   5   2 1176.48   39.10
   7   5  -2 1072.89   33.60
   7   5  -2 1111.49   35.20
   7   5  -2 1157.68   35.00
  -7   5   2 1194.18   34.20
   7   5  -2 1217.68   44.70
   5  -5  -2  816.12   24.30
  -5  -5   2  808.72   27.00
   5  -5  -2  754.22   25.20
  -5  -5   2  819.72   26.70
  -5  -5   2  771.72   31.10
  -5  -5   2  817.32   25.20
   5   5  -2  823.02   33.60
   5   5  -2  765.02   25.50
  -5   5   2  797.22   22.50
  -5   5   2  802.62   24.80
   5   5  -2  786.62   25.50
  -5   5   2  793.12   29.70
  -5   5   2  770.42   26.20
  -3  -5   2  654.03   22.70
  -3  -5   2  661.33   23.30
   3  -5  -2  657.63   20.80
   3  -5  -2  673.93   22.90
  -3  -5   2  639.94   26.50
  -3  -5   2  678.53   21.20
   3  -5  -2  650.63   19.70
   3   5  -2  623.34   21.80
   3   5  -2  618.34   23.00
   3   5  -2  670.83   29.10
  -3   5   2  663.23   26.70
  -3   5   2  680.23   21.30
   3   5  -2  638.24   20.10
  -3   5   2  662.03   23.00
  -3   5   2  656.43   19.40
   3   5  -2  676.33   20.10
   1  -5  -2 3839.92  110.29
   1  -5  -2 4030.70  105.49
   1  -5  -2 4042.00  106.49
  -1  -5   2 3977.00  109.29
  -1  -5   2 4037.60  106.09
  -1  -5   2 3810.62  111.99
  -1  -5   2 3976.70  108.49
   1   5  -2 4078.29  105.39
  -1   5   2 3962.00  106.69
   1   5  -2 3982.20  107.89
  -1   5   2 3823.02  109.09
  -1   5   2 4074.29  105.19
   1   5  -2 3957.40  115.89
   1   5  -2 3889.51  107.39
   1   5  -2 3970.20  105.69
  -1   5   2 4204.38  115.49
   1  -5   2  582.64   21.40
  -1  -5  -2  627.14   17.10
   1  -5   2  614.14   23.60
   1  -5   2  610.74   22.30
  -1  -5  -2  563.94   23.90
  -1  -5  -2  621.44   20.30
   1  -5   2  602.44   19.10
  -1  -5  -2  643.54   19.60
  -1   5  -2  600.24   26.60
   1   5   2  601.64   19.00
   1   5   2  608.94   20.30
  -1   5  -2  616.04   18.60
  -1   5  -2  592.44   20.30
   1   5   2  609.14   17.00
  -1   5  -2  609.54   21.10
   1   5   2  595.54   22.40
   1   5   2  691.13   28.30
  -1   5  -2  611.04   19.60
   3  -5   2  641.14   24.50
  -3  -5  -2  647.04   19.10
   3  -5   2  670.43   23.40
  -3  -5  -2  696.03   22.30
   3  -5   2  675.33   24.00
   3  -5   2  680.63   20.40
  -3  -5  -2  652.23   21.30
   3   5   2  662.33   22.00
   3   5   2  672.23   20.90
   3   5   2  640.94   29.60
   3   5   2  673.83   19.00
  -3   5  -2  684.73   21.80
  -5  -5  -2 1472.55   51.59
  -5  -5  -2 1497.35   41.60
   5  -5   2 1510.55   46.50
   5  -5   2 1508.45   46.10
   5  -5   2 1545.95   42.10
  -5  -5  -2 1544.15   44.10
  -5  -5  -2 1509.85   45.00
   5  -5   2 1505.35   41.30
  -5   5  -2 1527.95   45.30
   5   5   2 1490.55   44.50
  -5   5  -2 1509.55   44.40
   5   5   2 1561.54   46.90
  -5   5  -2 1589.44   51.19
   5   5   2 1537.05   41.40
   5   5   2 1484.15   43.20
  -7  -5  -2  955.90   30.40
   7  -5   2  951.40   31.30
  -7  -5  -2  823.92   35.90
   7  -5   2  931.61   26.50
  -7  -5  -2  949.11   27.00
   7  -5   2  942.91   26.30
   7  -5   2  935.01   30.80
  -7  -5  -2  936.81   29.10
   7  -5   2  837.32   30.70
   7  -5   2  893.21   30.90
   7   5   2  900.71   27.30
  -7   5  -2  907.81   29.70
   7   5   2  950.20   29.40
  -7   5  -2  931.51   35.10
   7   5   2  934.61   31.00
  -9  -5  -2  510.85   18.80
  -9  -5  -2  522.85   20.20
   9  -5   2  525.65   21.10
   9  -5   2  530.95   20.30
   9  -5   2  558.54   21.00
  -9  -5  -2  516.45   17.10
  -9   5  -2  508.25   19.10
   9   5   2  465.75   16.30
   9   5   2  524.95   20.20
  -9   5  -2  521.35   24.20
 -11  -5  -2  605.14   19.70
  11  -5   2  602.24   22.80
 -11  -5  -2  608.14   23.20
  11  -5   2  603.34   24.00
 -11  -5  -2  582.34   21.30
  11  -5   2  545.95   18.00
 -11   5  -2  591.04   26.90
  11   5   2  641.04   22.90
 -11   5  -2  538.05   20.90
 -13  -5  -2   37.20    6.80
  13  -5   2   33.70    6.60
 -13  -5  -2   38.50    4.20
  13  -5   2   46.70    5.70
 -13  -5  -2   50.09    7.00
  13   5   2   39.70    6.10
 -13   5  -2   34.10    8.70
 -13   5  -2   30.20    3.50
  15  -5   2  649.74   26.90
  15  -5   2  639.54   24.30
 -15  -5  -2  628.84   22.20
 -15  -5  -2  636.34   23.70
 -15  -5  -2  657.43   26.40
  15   5   2  700.63   24.80
 -15   5  -2  641.44   21.00
 -15   5  -2  624.14   29.80
  15   5   2  583.44   23.90
 -17  -5  -2  563.54   21.60
  17  -5   2  538.75   21.70
 -17  -5  -2  541.75   23.70
 -17  -5  -2  533.85   28.80
 -17   5  -2  537.95   18.90
 -17   5  -2  504.95   27.50
  17   5   2  524.95   21.60
 -19  -5  -2   38.80    5.70
  19  -5   2   48.90    6.20
 -19  -5  -2   32.30    7.20
  19   5   2   54.69    7.70
 -19   5  -2   37.40    9.50
 -19   5  -2   54.89    5.20
 -21  -5  -2   49.70    7.30
  21  -5   2   37.80    6.40
 -21  -5  -2   30.30    7.70
 -21   5  -2   24.90    8.60
  21   5   2   53.29    7.70
 -21   5  -2   39.70    5.30
  22  -6  -2   13.50    3.40
 -22  -6   2   11.20    5.60
 -22  -6   2   10.50    3.90
 -22  -6   2    7.80    3.80
 -22   6   2   10.60    6.20
 -22   6   2   10.80    2.70
  20  -6  -2   91.19    6.80
 -20  -6   2   93.79    7.80
 -20  -6   2   93.09    9.60
 -20  -6   2   93.29    8.30
 -20   6   2   97.39    5.80
 -20   6   2  104.19   11.70
 -18  -6   2   91.09   13.80
 -18  -6   2   96.99    7.50
  18  -6  -2   79.09    6.30
  18  -6  -2   81.29    4.60
 -18  -6   2   71.89    8.40
 -18   6   2   93.99    5.10
 -18   6   2   82.19   10.40
 -18   6   2   71.19    5.90
  16  -6  -2   16.80    3.70
 -16  -6   2   22.30    4.50
 -16  -6   2   12.20    4.30
  16  -6  -2   23.20    2.90
 -16  -6   2   25.30    6.50
 -16   6   2   20.40    6.60
 -16   6   2   21.20    2.80
  16   6  -2   20.50    3.60
 -16   6   2   20.60    4.20
 -14  -6   2  242.78   13.60
 -14  -6   2  239.98   11.30
  14  -6  -2  247.88    8.30
  14  -6  -2  251.97   11.20
 -14  -6   2  219.08   12.10
 -14   6   2  250.07    8.50
 -14   6   2  248.78   15.80
 -14   6   2  246.78   11.40
 -12  -6   2   68.89    7.00
  12  -6  -2   67.09    5.30
 -12  -6   2   58.49    6.10
 -12  -6   2   66.19    5.30
  12   6  -2   68.59    6.10
 -12   6   2   71.59    6.00
 -12   6   2   61.59    8.10
 -10  -6   2    5.40    2.80
 -10  -6   2    6.70    2.10
 -10  -6   2    6.00    4.10
 -10  -6   2    8.40    3.70
 -10  -6   2    4.20    2.90
  10  -6  -2    9.20    2.80
  10   6  -2   11.60    2.90
 -10   6   2    8.00    4.50
 -10   6   2    6.40    2.60
  -8  -6   2  192.98    9.80
  -8  -6   2  191.18   11.00
  -8  -6   2  184.18   14.10
   8  -6  -2  190.28    8.80
  -8  -6   2  192.38   10.80
  -8  -6   2  176.18    8.20
   8  -6  -2  164.58    8.70
  -8   6   2  181.28    9.90
  -8   6   2  176.48   12.90
   8   6  -2  172.28    9.20
  -6  -6   2 1524.45   54.59
   6  -6  -2 1517.95   46.60
  -6  -6   2 1623.24   49.00
  -6  -6   2 1654.93   44.70
   6  -6  -2 1586.34   45.70
  -6  -6   2 1553.34   46.40
  -6  -6   2 1660.03   48.70
   6   6  -2 1516.85   46.80
  -6   6   2 1589.64   53.29
  -6   6   2 1526.65   47.50
  -6   6   2 1605.04   46.20
  -6   6   2 1600.84   42.90
   6   6  -2 1637.94   58.09
   4  -6  -2  435.26   17.20
   4  -6  -2  419.66   15.40
  -4  -6   2  469.75   17.90
   4  -6  -2  437.36   14.00
  -4  -6   2  421.56   18.00
  -4  -6   2  418.36   15.70
   4   6  -2  447.36   14.70
   4   6  -2  393.76   16.20
   4   6  -2  402.06   16.30
  -4   6   2  404.86   16.90
  -4   6   2  421.56   15.80
  -4   6   2  443.76   21.90
   4   6  -2  473.05   24.80
   4   6  -2  404.66   14.60
  -4   6   2  427.26   13.70
  -2  -6   2  588.14   28.80
   2  -6  -2  676.63   20.00
  -2  -6   2  619.54   20.80
   2  -6  -2  643.64   21.20
  -2  -6   2  642.74   23.20
   2  -6  -2  590.74   23.60
  -2   6   2  621.24   28.20
  -2   6   2  630.34   19.50
   2   6  -2  627.74   19.90
  -2   6   2  656.53   21.50
   2   6  -2  617.14   21.90
   2   6  -2  664.73   20.50
   2   6  -2  648.44   30.20
   2   6  -2  597.14   22.00
   0  -6  -2  290.67   15.20
   0  -6   2  283.77   13.20
   0  -6   2  275.27   11.00
   0  -6  -2  276.47   10.80
   0  -6   2  268.97   13.70
   0  -6   2  262.07   14.50
   0   6  -2  276.87   11.00
   0   6  -2  261.77   12.30
   0   6  -2  261.87   11.80
   0   6   2  253.97   12.80
   0   6   2  265.97   10.30
   0   6   2  286.67   18.20
   0   6   2  284.17   11.90
   0   6  -2  270.27   17.80
  -2  -6  -2  387.26   14.10
   2  -6   2  362.66   17.30
   2  -6   2  382.96   13.40
  -2  -6  -2  326.77   18.00
   2  -6   2  385.26   16.20
  -2  -6  -2  372.76   11.40
  -2  -6  -2  395.56   15.10
   2  -6   2  373.06   16.90
   2   6   2  386.86   13.50
   2   6   2  361.16   14.60
   2   6   2  397.66   22.60
   2   6   2  339.07   15.80
  -2   6  -2  344.77   20.60
   2   6   2  377.36   11.20
  -4  -6  -2 1252.87   38.30
   4  -6   2 1270.77   39.80
  -4  -6  -2 1265.27   37.40
  -4  -6  -2 1293.07   34.60
   4  -6   2 1296.87   35.80
  -4  -6  -2 1245.28   49.20
   4  -6   2 1090.59   40.00
   4   6   2 1207.58   40.00
   4   6   2 1206.08   36.30
  -4   6  -2 1301.57   46.70
   4   6   2 1268.37   34.10
  -4   6  -2 1203.38   37.40
   6  -6   2  732.23   21.30
   6  -6   2  709.03   20.30
  -6  -6  -2  694.23   23.40
   6  -6   2  689.53   25.40
  -6  -6  -2  671.13   20.80
  -6  -6  -2  690.43   24.50
   6  -6   2  715.13   26.30
  -6   6  -2  661.93   29.90
   6   6   2  635.64   23.50
   6   6   2  648.74   25.50
   6   6   2  701.23   26.00
   6   6   2  715.93   20.50
   8  -6   2   -0.20    1.10
   8  -6   2    3.30    2.60
   8  -6   2    2.00    1.10
  -8  -6  -2    1.40    2.10
   8  -6   2   -0.70    2.10
  -8  -6  -2    3.20    2.30
  -8  -6  -2    3.00    1.60
   8   6   2    4.60    3.30
   8   6   2    2.20    1.20
  -8   6  -2    0.20    3.40
  10  -6   2   79.49    4.40
 -10  -6  -2   75.89    6.50
  10  -6   2   97.29    8.40
 -10  -6  -2   75.89    7.30
  10  -6   2   81.39    7.40
 -10  -6  -2   80.49    5.40
  10  -6   2   81.99    4.50
  10   6   2   72.99    7.30
 -10   6  -2   86.59   10.30
  12  -6   2   73.69    7.30
 -12  -6  -2   66.99    7.30
 -12  -6  -2   70.89    6.60
  12  -6   2   70.19    7.70
  12  -6   2   74.69    4.90
 -12  -6  -2   74.29    5.50
  12   6   2   62.39    7.00
 -12   6  -2   74.79    9.80
 -14  -6  -2   73.29    8.10
 -14  -6  -2   72.89    6.90
  14  -6   2   73.09    7.70
 -14  -6  -2   68.19    5.80
  14  -6   2   72.39    7.60
  14   6   2   66.29    7.00
 -14   6  -2   82.99   10.90
 -16  -6  -2   81.39    9.30
  16  -6   2   74.69    7.90
  16  -6   2   78.19    8.20
 -16  -6  -2   81.29    8.10
 -16  -6  -2   68.89   10.00
  16   6   2   90.29    8.10
 -16   6  -2   63.89   11.80
  18  -6   2   13.80    4.50
 -18  -6  -2   16.70    4.30
 -18  -6  -2   10.10    4.20
  18  -6   2   15.30    4.40
 -18  -6  -2   12.00    5.30
 -18   6  -2   13.80    3.30
 -18   6  -2    7.60    5.70
  18   6   2   12.70    4.60
 -20  -6  -2    8.80    4.90
  20  -6   2    7.90    4.10
  20  -6   2    6.60    4.00
 -20  -6  -2   10.50    4.90
 -20  -6  -2    6.90    3.80
 -20   6  -2    6.20    3.60
 -20   6  -2    0.80    5.10
  20   6   2    9.00    4.00
 -21  -7   2    5.80    4.80
  21  -7  -2    4.40    2.90
 -21  -7   2   -0.70    3.00
 -21  -7   2    2.80    3.00
 -21   7   2    2.00    1.80
 -21   7   2    5.10    5.70
 -19  -7   2  384.36   17.20
 -19  -7   2  403.66   20.70
 -19  -7   2  398.86   18.70
  19  -7  -2  386.66   16.20
 -19   7   2  397.16   13.40
 -19   7   2  391.76   23.60
 -17  -7   2   79.99    7.90
 -17  -7   2   76.39    6.80
  17  -7  -2   86.99    6.70
 -17  -7   2   69.79    8.30
 -17   7   2   89.89    4.50
 -17   7   2   99.89   11.70
  17   7  -2   67.89    6.00
 -15  -7   2   48.20    7.60
 -15  -7   2   33.00    9.00
  15  -7  -2   36.20    4.40
 -15  -7   2   24.80    4.70
 -15   7   2   46.40   10.00
  15   7  -2   34.70    5.60
 -13  -7   2    3.40    2.30
 -13  -7   2    3.00    3.20
 -13  -7   2    5.80    3.50
  13  -7  -2    1.40    1.80
 -13   7   2    1.00    3.80
 -11  -7   2   60.09    5.10
 -11  -7   2   60.59    6.20
  11  -7  -2   56.99    5.10
 -11  -7   2   52.19    6.60
 -11   7   2   55.49   10.00
  -9  -7   2   20.40    4.40
  -9  -7   2   22.40    5.30
   9  -7  -2   28.30    3.70
  -9  -7   2   27.00    6.00
  -9  -7   2   21.10    3.20
  -9   7   2   18.70    6.00
  -7  -7   2  209.48   12.70
   7  -7  -2  233.88   10.50
  -7  -7   2  204.78    9.10
  -7  -7   2  213.08   10.90
  -7  -7   2  200.68   11.90
   7   7  -2  213.98   18.70
  -7   7   2  203.78   10.10
  -7   7   2  215.48    7.70
  -7   7   2  193.08   15.40
  -5  -7   2  345.97   12.50
  -5  -7   2  337.47   14.30
   5  -7  -2  353.36   12.20
  -5  -7   2  360.26   17.10
  -5  -7   2  349.47   16.20
   5  -7  -2  351.06   14.10
  -5   7   2  346.97   11.70
   5   7  -2  300.47   21.70
  -5   7   2  353.76   14.40
  -5   7   2  377.96   21.40
  -3  -7   2  120.59    7.50
   3  -7  -2  130.39    6.50
  -3  -7   2  138.99    9.20
  -3  -7   2  110.09   12.00
  -3  -7   2  110.79    9.20
   3   7  -2  119.19   13.40
  -3   7   2  116.39    7.40
  -3   7   2  119.69   12.90
  -3   7   2  133.79    6.10
   3   7  -2  127.09    6.90
  -1  -7   2   63.49    6.50
   1  -7  -2   75.39    5.20
  -1  -7   2   73.19    7.50
   1  -7  -2   73.69    6.00
  -1  -7   2   69.69    5.40
  -1   7   2   54.39   10.50
   1   7  -2   70.19    4.60
  -1   7   2   75.59    5.80
   1   7  -2   81.99   14.50
  -1   7   2   75.29    4.70
   1   7  -2   80.89    6.20
  -1  -7  -2   34.30    2.30
   1  -7   2   26.80    5.20
   1  -7   2   42.90    6.90
   1  -7   2   36.70    4.80
  -1  -7  -2   30.80    4.10
  -1  -7  -2   38.80    4.60
   1   7   2   30.50    3.20
  -1   7  -2   38.50    4.00
  -1   7  -2   19.50    6.40
  -1   7  -2   35.90    3.20
   1   7   2   29.40    8.70
   1   7   2   32.70    3.90
  -3  -7  -2   36.30    4.30
   3  -7   2   52.29    8.10
  -3  -7  -2   35.80    4.70
   3  -7   2   33.20    3.80
  -3  -7  -2   43.20    2.90
   3  -7   2   42.10    5.50
  -3   7  -2   31.70    5.90
   3   7   2   37.00    4.30
  -3   7  -2   46.10   10.50
   3   7   2   25.80    8.00
  -5  -7  -2   13.50    3.80
   5  -7   2   13.50    5.30
  -5  -7  -2   16.00    3.80
   5  -7   2    8.40    3.30
   5  -7   2   16.70    2.30
   5  -7   2   15.10    2.80
  -5  -7  -2   15.20    2.40
  -5   7  -2   15.10    7.70
   5   7   2    7.50    2.50
   5   7   2   17.60    2.30
   7  -7   2  118.59    6.10
   7  -7   2  115.19    9.00
  -7  -7  -2  111.89    7.70
   7  -7   2  117.39    9.70
  -7  -7  -2  115.39    6.00
  -7  -7  -2  127.09    8.80
   7   7   2  115.19    9.30
   7   7   2  111.49    5.40
  -7   7  -2  116.69   12.70
   9  -7   2  138.29   10.20
  -9  -7  -2  151.38   10.20
  -9  -7  -2  149.99    9.40
   9  -7   2  157.98    7.00
  -9  -7  -2  147.39    7.50
   9  -7   2  140.69    6.20
   9  -7   2  144.29   10.90
   9   7   2  158.58   10.70
  -9   7  -2  147.29   14.20
 -11  -7  -2   98.29    7.80
 -11  -7  -2   86.39    6.00
  11  -7   2   89.79    5.40
  11  -7   2   96.19    9.20
  11  -7   2  102.69    9.00
  11  -7   2   97.89    5.10
 -11  -7  -2   93.49    8.60
  11   7   2  105.59    8.80
 -11   7  -2   86.19   11.20
 -13  -7  -2    1.60    2.70
  13  -7   2    1.00    1.50
  13  -7   2    1.10    3.40
  13  -7   2    2.90    3.50
 -13  -7  -2    5.40    3.80
 -13  -7  -2    2.20    2.00
 -13   7  -2    0.10    3.70
  13   7   2   -2.10    3.00
  15  -7   2    3.20    3.10
 -15  -7  -2    9.90    4.10
 -15  -7  -2    6.50    2.60
 -15  -7  -2    3.70    4.30
  15  -7   2    4.30    3.80
 -15   7  -2    4.70    4.70
  15   7   2    5.20    3.50
  17  -7   2  117.39   10.30
 -17  -7  -2  110.19    8.00
 -17  -7  -2  112.19   10.70
  17  -7   2  111.99   10.20
 -17  -7  -2  115.89    9.50
 -17   7  -2  107.39   17.10
  17   7   2  109.69    9.30
  19  -7   2    0.30    3.80
 -19  -7  -2    2.90    3.80
  19  -7   2   -1.80    3.50
 -19  -7  -2    0.40    3.30
 -19  -7  -2    2.80    2.50
  19   7   2    4.00    3.30
 -19   7  -2    2.20    5.90
  20  -8  -2    6.00    2.90
 -20  -8   2    3.90    4.00
 -20  -8   2    3.50    3.40
 -20  -8   2    1.60    3.00
 -20   8   2    5.70    5.70
 -18  -8   2  310.77   18.00
 -18  -8   2  293.77   16.10
 -18  -8   2  278.47   14.20
  18  -8  -2  299.37   13.80
 -18   8   2  325.67   22.10
  16  -8  -2  158.68    9.10
 -16  -8   2  135.59    9.00
 -16  -8   2  152.48   12.10
 -16  -8   2  128.29   10.20
 -16   8   2  141.99   14.50
 -14  -8   2  137.09   11.10
 -14  -8   2  117.59    9.40
  14  -8  -2  140.69    8.50
 -14   8   2  120.19   23.30
 -12  -8   2  115.29    7.40
  12  -8  -2  118.39    7.80
 -12  -8   2  101.49    9.40
 -12  -8   2  119.39    9.10
 -12   8   2  124.79   13.40
 -10  -8   2   35.70    7.80
 -10  -8   2   25.60    4.60
  10  -8  -2   30.70    5.10
 -10  -8   2   25.50    4.00
  10   8  -2   27.40    4.00
 -10   8   2   23.20    8.10
  -8  -8   2  355.16   18.60
   8  -8  -2  325.27   15.70
  -8  -8   2  339.57   17.00
  -8  -8   2  360.96   13.50
  -8   8   2  322.17   14.30
  -8   8   2  352.16   22.20
  -8   8   2  348.07   11.20
   8   8  -2  313.97   24.60
  -6  -8   2 1250.67   43.90
   6  -8  -2 1272.27   40.40
  -6  -8   2 1288.57   40.30
  -6  -8   2 1287.77   37.40
  -6  -8   2 1258.17   42.50
   6  -8  -2 1326.77   36.70
  -6   8   2 1290.97   40.20
  -6   8   2 1271.27   36.00
   6   8  -2 1251.97   53.69
  -6   8   2 1302.97   50.49
  -4  -8   2  150.58   10.50
   4  -8  -2  154.48    7.60
   4  -8  -2  174.38    9.60
  -4  -8   2  157.68   11.70
  -4  -8   2  154.68    9.20
   4   8  -2  162.98   16.90
  -4   8   2  156.68    9.10
  -4   8   2  154.48   15.40
   4   8  -2  155.08    9.20
   2  -8  -2   59.39    4.90
  -2  -8   2   63.29    5.60
  -2  -8   2   58.79    7.40
   2  -8  -2   64.29    5.90
  -2   8   2   56.49    6.50
  -2   8   2   54.69   12.50
   2   8  -2   92.69   17.40
  -2   8   2   61.69    4.20
   2   8  -2   63.49    5.30
   0  -8  -2  240.78   10.90
   0  -8   2  253.37   11.40
   0  -8   2  243.28   13.60
   0  -8   2  223.78   14.30
   0  -8  -2  252.37   12.40
   0   8  -2  221.08   19.00
   0   8   2  235.18   11.80
   0   8   2  246.88   19.80
   0   8  -2  235.68   12.40
  -2  -8  -2  450.15   18.50
   2  -8   2  429.96   20.90
  -2  -8  -2  446.16   17.10
   2  -8   2  482.55   16.90
  -2  -8  -2  451.25   13.80
   2   8   2  409.76   17.80
   2   8   2  465.55   28.40
  -2   8  -2  453.55   27.40
   4  -8   2 1009.90   30.60
  -4  -8  -2  990.30   28.40
  -4  -8  -2  993.40   33.70
   4  -8   2  954.40   36.30
   4  -8   2 1004.50   35.20
  -4  -8  -2  983.70   32.10
  -4   8  -2  990.50   44.10
   4   8   2  995.80   45.90
  -6  -8  -2  380.46   17.70
   6  -8   2  396.06   20.00
   6  -8   2  403.66   18.90
   6  -8   2  414.46   14.80
  -6  -8  -2  410.86   13.80
   6  -8   2  392.46   12.90
  -6  -8  -2  400.96   16.80
  -6   8  -2  385.36   25.20
  -8  -8  -2    1.60    1.70
   8  -8   2    3.80    1.40
  -8  -8  -2    4.70    2.70
   8  -8   2   10.30    4.60
  -8  -8  -2    8.30    3.90
   8  -8   2    6.80    4.00
   8  -8   2    3.70    1.90
   8   8   2    6.30    3.80
  -8   8  -2   11.00    8.20
  10  -8   2  144.09   11.00
 -10  -8  -2  136.39   10.40
 -10  -8  -2  143.49    7.60
  10  -8   2  130.39   11.30
 -10  -8  -2  122.79    9.10
  10  -8   2  118.09    5.80
  10  -8   2  147.09    6.80
 -10   8  -2  127.69   14.60
  10   8   2  118.39   10.20
 -12  -8  -2  396.36   19.60
 -12  -8  -2  408.26   15.50
  12  -8   2  368.26   19.70
  12  -8   2  389.96   19.50
  12   8   2  399.16   18.90
  14  -8   2  175.78   13.20
 -14  -8  -2  176.18    9.60
  14  -8   2  168.98   12.60
 -14  -8  -2  177.78   11.70
 -14   8  -2  180.28   17.70
  14   8   2  189.78   12.30
 -16  -8  -2  160.18    9.60
  16  -8   2  140.19   12.20
  16  -8   2  138.69   11.80
 -16  -8  -2  169.58   11.50
 -16  -8  -2  167.68   13.10
  16   8   2  159.28   11.30
 -16   8  -2  163.58   17.30
  18  -8   2   12.90    5.30
  18  -8   2   22.50    6.60
 -18  -8  -2   13.10    4.50
 -18  -8  -2    9.10    4.60
 -18  -8  -2   14.40    3.80
 -18   8  -2   -1.20    4.40
  18   8   2   12.50    4.60
 -19  -9   2   40.90    7.10
 -19  -9   2   42.00    6.60
 -19  -9   2   35.00    7.90
 -19   9   2   46.60   12.50
 -17  -9   2  239.98   16.10
  17  -9  -2  229.58   12.00
 -17  -9   2  232.28   14.30
 -17  -9   2  210.88   12.00
 -17   9   2  259.67   21.20
 -15  -9   2   53.89    5.90
 -15  -9   2   71.19    8.00
 -15  -9   2   59.69   10.10
  15  -9  -2   70.89    6.70
 -15   9   2   37.40   10.40
 -13  -9   2   74.29    7.80
 -13  -9   2   85.09    7.80
 -13  -9   2   77.49    9.00
 -13   9   2   88.09   14.80
 -11  -9   2  239.98   13.70
 -11  -9   2  247.38   11.60
 -11  -9   2  214.58   16.60
  11  -9  -2  272.77   13.00
  11   9  -2  255.57   11.50
 -11   9   2  260.67   23.80
   9  -9  -2  799.12   26.90
  -9  -9   2  757.62   24.60
  -9  -9   2  671.43   26.90
  -9  -9   2  766.02   30.00
  -9   9   2  709.73   36.50
  -7  -9   2  218.58    9.80
   7  -9  -2  226.98    9.10
  -7  -9   2  173.58   14.10
   7  -9  -2  213.68   11.40
  -7  -9   2  201.78   13.20
  -7  -9   2  195.38   11.70
  -7   9   2  197.78   11.10
  -7   9   2  215.88   18.80
  -7   9   2  219.08    8.30
   7   9  -2  233.78   21.90
  -5  -9   2  952.60   34.70
   5  -9  -2  974.90   29.10
  -5  -9   2  932.11   36.70
   5  -9  -2  967.60   32.10
  -5  -9   2  969.00   32.30
  -5  -9   2 1026.10   29.30
   5   9  -2  996.50   47.10
  -5   9   2  881.31   31.80
  -5   9   2  932.91   43.40
   5   9  -2  908.01   29.90
  -5   9   2  924.51   28.20
   3  -9  -2  371.76   16.20
  -3  -9   2  362.86   15.70
   3  -9  -2  358.16   13.90
  -3  -9   2  344.07   19.30
  -3  -9   2  351.26   17.80
   3   9  -2  408.26   27.70
  -3   9   2  327.17   15.50
  -3   9   2  333.27   24.40
  -1  -9   2  675.03   27.10
  -1  -9   2  698.83   24.20
   1  -9  -2  685.73   23.10
  -1  -9   2  643.34   28.70
   1  -9  -2  691.43   25.30
  -1   9   2  650.23   35.70
   1  -9   2  644.64   26.30
  -1  -9  -2  621.04   18.90
  -1  -9  -2  663.23   24.90
  -1  -9  -2  642.44   22.80
   1  -9   2  682.13   23.00
   1   9   2  611.44   35.00
  -1   9  -2  639.64   35.90
   3  -9   2  766.82   30.40
   3  -9   2  784.72   26.10
  -3  -9  -2  811.02   27.40
  -3  -9  -2  808.12   23.10
   3  -9   2  775.92   32.30
  -3  -9  -2  817.82   29.20
  -3   9  -2  807.12   40.60
   3   9   2  737.83   40.40
  -5  -9  -2  319.97   15.90
   5  -9   2  308.87   12.90
   5  -9   2  322.87   17.00
  -5  -9  -2  321.37   11.40
   5  -9   2  313.97   10.80
  -5  -9  -2  303.27   14.40
   5  -9   2  320.17   18.50
  -5   9  -2  295.77   23.40
  -7  -9  -2  885.11   26.20
   7  -9   2  815.62   24.80
  -7  -9  -2  836.52   29.80
  -7  -9  -2  842.82   31.60
   7  -9   2  865.61   26.90
   7  -9   2  845.12   34.40
   7  -9   2  838.22   32.50
  -7   9  -2  915.11   43.40
  -9  -9  -2   24.00    6.60
   9  -9   2   30.80    6.40
  -9  -9  -2   25.30    3.70
   9  -9   2   43.30    9.00
   9  -9   2   29.40    3.00
   9  -9   2   24.60    3.60
  -9  -9  -2   30.40    7.10
   9   9   2   28.80    6.50
  -9   9  -2   18.10    8.10
 -11  -9  -2  234.38   13.50
  11  -9   2  242.38    9.80
 -11  -9  -2  254.67   11.20
 -11  -9  -2  237.08   14.90
  11  -9   2  259.27   15.50
  11  -9   2  251.07   16.60
  11   9   2  234.88   14.70
 -11   9  -2  245.28   21.60
  13  -9   2  181.38   13.40
  13  -9   2  168.08   14.40
 -13  -9  -2  187.38   12.10
 -13  -9  -2  170.18   13.10
 -13  -9  -2  214.98   10.30
 -13   9  -2  207.48   19.30
  13   9   2  157.28   12.10
 -15  -9  -2  206.18   15.00
 -15  -9  -2  214.18   13.40
  15  -9   2  221.48   17.40
  15  -9   2  196.28   14.20
 -15  -9  -2  205.08   11.00
  15   9   2  245.28   14.30
 -15   9  -2  212.08   20.60
  17  -9   2   35.80    7.60
 -17  -9  -2   28.50    4.90
 -17  -9  -2   37.70    7.60
 -17  -9  -2   45.30    9.80
  17  -9   2   45.10    8.80
 -17   9  -2   22.20   10.50
  17   9   2   53.19    8.10
  16 -10  -2   57.99    7.30
 -16 -10   2   39.60    8.30
 -16 -10   2   56.69    7.50
 -16 -10   2   75.69   10.50
 -16  10   2   60.59   13.10
 -14 -10   2   73.59    6.70
  14 -10  -2   84.59    7.30
 -14 -10   2   72.39    9.20
 -14 -10   2   61.59    9.00
 -14  10   2   61.49   13.80
 -12 -10   2   10.50    3.40
  12 -10  -2    8.40    3.20
 -12 -10   2    7.50    4.40
 -12 -10   2    6.40    4.30
 -12  10   2   10.30    6.50
  12  10  -2   10.00    3.20
 -10 -10   2  301.07   16.00
  10 -10  -2  294.27   14.60
 -10 -10   2  323.87   18.00
 -10 -10   2  307.77   13.40
 -10  10   2  311.77   24.10
   8 -10  -2  377.76   16.60
  -8 -10   2  380.46   28.30
  -8 -10   2  372.16   14.40
  -8 -10   2  344.37   17.00
  -8  10   2  325.27   25.40
   8  10  -2  321.67   27.70
  -6 -10   2  152.78    8.10
  -6 -10   2  161.28   12.20
  -6 -10   2  162.28   14.10
   6 -10  -2  152.78   10.00
  -6 -10   2  142.69   10.20
   6 -10  -2  162.28    8.10
  -6  10   2  189.68   30.30
  -6  10   2  136.99    7.00
   6  10  -2  149.79   19.10
   4 -10  -2  153.78    8.50
  -4 -10   2  150.58   13.20
  -4 -10   2  143.69   10.00
  -4 -10   2  157.48    7.90
  -4 -10   2  161.68   12.00
   4 -10  -2  169.28   10.60
  -4  10   2  158.18   18.20
   4  10  -2  144.69   18.40
   2 -10  -2  312.77   13.30
  -2 -10   2  281.67   16.50
  -2 -10   2  257.77   17.80
  -2 -10   2  299.37   14.40
  -2 -10   2  304.47   11.60
   2 -10  -2  307.27   15.20
  -2  10   2  351.46   25.70
   2  10  -2  276.07   24.40
   0 -10  -2  299.97   15.20
   0 -10   2  299.87   14.00
   0 -10   2  288.87   16.50
   0 -10  -2  302.77   13.60
   0  10   2  258.17   23.50
   0  10  -2  296.97   25.50
   2 -10   2  612.34   26.40
   2 -10   2  622.64   29.00
  -2 -10  -2  598.34   22.70
  -2 -10  -2  648.14   25.10
   2 -10   2  607.24   22.30
  -2 -10  -2  610.14   18.20
   2  10   2  603.34   36.90
  -2  10  -2  599.14   36.50
   4 -10   2  148.69   13.40
  -4 -10  -2  145.29   10.80
  -4 -10  -2  149.09    6.60
   4 -10   2  144.99    6.40
   4 -10   2  142.69    8.60
  -4 -10  -2  144.69    9.60
   4 -10   2  159.88   12.10
  -4  10  -2  143.19   18.10
   4  10   2  109.09   19.40
   6 -10   2   47.50    5.10
  -6 -10  -2   39.30    6.70
  -6 -10  -2   37.60    5.70
  -6 -10  -2   40.80    3.80
   6 -10   2   41.00    7.40
   6 -10   2   40.30    3.30
  -8 -10  -2  236.78   14.70
   8 -10   2  217.88   16.60
  -8 -10  -2  235.18   10.00
   8 -10   2  248.58   15.40
   8 -10   2  207.68    9.20
   8 -10   2  235.58   10.60
  -8 -10  -2  243.18   13.50
   8  10   2  256.57   16.20
  -8  10  -2  184.68   20.30
  10 -10   2  250.47   17.10
 -10 -10  -2  215.28   13.30
  10 -10   2  221.58   14.90
  10 -10   2  230.98   10.00
 -10 -10  -2  230.38   10.50
 -10 -10  -2  217.38   14.60
  10  10   2  246.78   15.50
 -10  10  -2  207.38   21.30
 -12 -10  -2   66.99    7.60
  12 -10   2   50.69    9.50
 -12 -10  -2   55.09    9.40
 -12 -10  -2   49.30    5.20
  12 -10   2   52.69   10.00
 -12  10  -2   44.50   12.40
  12  10   2   64.49    9.30
 -14 -10  -2   46.00    7.10
  14 -10   2   66.09    8.60
  14 -10   2   47.40    9.30
 -14 -10  -2   58.39    5.90
 -14 -10  -2   52.49    9.10
 -14  10  -2   35.10   11.70
  14  10   2   58.09    8.60
  16 -10   2    6.60    4.90
 -16 -10  -2    1.90    4.30
 -16 -10  -2    7.60    4.10
 -16 -10  -2    2.80    2.90
  16 -10   2   10.40    5.60
 -16  10  -2   -5.30    6.60
  16  10   2    6.80    5.00
 -13 -11   2   59.39    6.20
 -13 -11   2   36.60    7.60
  13 -11  -2   45.50    5.90
 -13 -11   2   39.60    7.70
  13  11  -2   49.60    5.50
 -13  11   2   30.50   11.30
 -11 -11   2    2.10    4.30
 -11 -11   2   -1.40    1.90
  11 -11  -2    4.00    3.10
 -11 -11   2    5.30    4.40
 -11  11   2    5.70    6.80
  11  11  -2    4.90    3.10
  -9 -11   2   -1.60    3.10
  -9 -11   2   -0.30    1.90
  -9 -11   2    4.60    3.30
   9 -11  -2    2.60    3.10
  -9  11   2    3.90    1.60
  -9  11   2   -0.10    5.80
  -7 -11   2    7.00    4.80
  -7 -11   2    6.50    2.70
   7 -11  -2    4.80    2.30
   7 -11  -2   12.40    4.10
  -7 -11   2    6.30    4.30
  -7  11   2   10.90    9.40
   7  11  -2    7.90   10.70
  -5 -11   2    3.70    4.60
  -5 -11   2   -0.60    3.00
   5 -11  -2   -1.10    2.40
   5 -11  -2    4.40    2.60
  -5 -11   2   -1.10    3.60
  -5 -11   2    1.00    1.90
  -5  11   2    6.50    8.00
   5  11  -2   -0.30    6.30
   3 -11  -2   81.99    6.80
  -3 -11   2  103.39   16.40
   3 -11  -2   86.19    8.10
  -3 -11   2   90.89    5.90
  -3 -11   2   72.39   11.60
  -3  11   2   57.59   13.30
   3  11  -2  105.69   21.60
  -1 -11   2    1.00    4.20
  -1 -11   2    1.60    4.10
  -1 -11   2    1.50    1.80
   1 -11  -2    1.80    2.50
   1 -11  -2    1.60    3.00
  -1 -11   2    1.20    2.80
  -1  11   2    0.20    7.00
   1  11  -2   -1.70   13.00
   1 -11   2   12.70    5.70
  -1 -11  -2    9.70    4.60
   1 -11   2   13.20    5.00
  -1 -11  -2   19.30    4.80
   1 -11   2   12.20    4.20
   1  11   2    2.80    7.70
  -1  11  -2   13.50   10.50
  -3 -11  -2    4.50    3.70
   3 -11   2    3.40    4.70
  -3 -11  -2    7.90    1.80
   3 -11   2    5.60    4.00
  -3 -11  -2    7.70    3.40
   3 -11   2    8.40    3.50
   3  11   2   10.70    9.10
  -3  11  -2   12.60    9.50
  -5 -11  -2   14.70    4.10
   5 -11   2   18.20    7.60
   5 -11   2   20.30    4.40
  -5 -11  -2   22.70    3.10
   5 -11   2   16.70    6.00
  -5 -11  -2   15.10    5.00
  -5  11  -2   16.30    8.80
   7 -11   2   -2.80    1.70
   7 -11   2    0.00    4.00
  -7 -11  -2    0.80    2.70
  -7 -11  -2    1.00    3.50
  -7 -11  -2    1.80    1.80
   7 -11   2    0.30    4.30
  -7  11  -2    0.70    5.70
  -9 -11  -2   65.79    5.40
   9 -11   2   55.29    9.00
  -9 -11  -2   87.09   11.20
   9 -11   2   82.19    5.90
  -9 -11  -2   52.99    8.10
   9 -11   2   50.29   10.10
  -9  11  -2   76.39   18.40
   9  11   2   60.09    9.60
  11 -11   2   10.80    5.90
 -11 -11  -2    7.30    4.30
 -11 -11  -2   13.20    3.50
  11 -11   2    7.70    5.70
  11 -11   2   10.00    2.60
 -11 -11  -2    8.00    3.90
 -11  11  -2    4.50    7.30
 -13 -11  -2    1.00    2.40
  13 -11   2    2.20    4.60
 -13 -11  -2   -2.70    3.40
  13 -11   2    2.10    6.40
 -13 -11  -2    6.00    4.30
  13  11   2    4.70    4.60
 -13  11  -2    4.90    8.50
 -10 -12   2   95.19    9.50
  10 -12  -2  117.09    9.20
 -10 -12   2  102.99    7.50
 -10 -12   2  100.09   11.00
 -10  12   2   79.99   16.30
   8 -12  -2  150.58   10.70
  -8 -12   2  149.09   11.50
  -8 -12   2  151.28   13.30
  -8  12   2  162.78   27.30
   8  12  -2  142.69   25.40
  -6 -12   2  116.29    7.40
   6 -12  -2  108.59    9.50
   6 -12  -2  123.59    7.80
  -6 -12   2  106.59   11.20
  -6 -12   2  124.49   10.00
   6  12  -2  151.28   28.10
  -6  12   2  116.69   22.20
   4 -12  -2    5.10    3.30
   4 -12  -2    9.50    4.10
  -4 -12   2    8.20    2.60
  -4 -12   2    8.80    5.90
  -4 -12   2   12.80    4.80
  -4  12   2   13.50    8.20
   4  12  -2    6.60    8.90
  -2 -12   2  128.19   14.40
  -2 -12   2  129.49    7.10
   2 -12  -2  121.09    8.60
   2 -12  -2  116.99   10.00
  -2 -12   2  116.59    9.40
  -2 -12   2  113.49   11.30
  -2  12   2  119.39   23.70
   2  12  -2   91.79   19.60
   0 -12   2   83.29   13.50
   0 -12   2  110.69   11.00
   0 -12   2  104.79    8.80
   0 -12  -2  101.39    9.70
   0 -12   2  123.29    6.50
   0 -12  -2   85.59    8.90
   0  12   2   74.59   18.10
   0  12  -2   81.19   16.70
  -2 -12  -2  237.88   14.60
  -2 -12  -2  207.08   12.30
   2 -12   2  205.88   12.00
   2 -12   2  191.78   17.30
   2 -12   2  212.78   15.10
  -2  12  -2  222.38   24.70
   2  12   2  209.28   24.30
  -4 -12  -2  113.89   10.60
  -4 -12  -2  113.89    5.60
  -4 -12  -2   95.89    8.90
   4 -12   2  103.29   13.10
   4 -12   2   95.59   10.90
   4 -12   2  108.89    8.30
   4  12   2  134.19   24.80
  -4  12  -2   68.09   15.40
   6 -12   2   17.60    7.70
  -6 -12  -2   20.10    5.40
  -6 -12  -2   18.40    3.00
  -6 -12  -2   10.60    5.80
   6 -12   2   20.00    6.80
   6 -12   2   20.70    4.40
  -6  12  -2   11.50    8.10
  -8 -12  -2   16.30    5.00
  -8 -12  -2   19.00    6.60
  -8 -12  -2   15.10    3.20
   8 -12   2   13.50    3.60
   8 -12   2   18.80    8.00
   8 -12   2   21.60    6.70
   8  12   2    5.90    5.10
  -8  12  -2    7.70    8.90
 -10 -12  -2   78.09    8.80
  10 -12   2   84.79    9.80
  10 -12   2   71.59   12.90
 -10 -12  -2   75.69    6.00
 -10 -12  -2   79.89    9.90
  10 -12   2   80.49    5.90
  10  12   2   74.49   10.90
 -10  12  -2   85.99   20.20
   7  13  -2  182.98   29.00
  -7  13   2  209.88   25.00
  -5 -13   2  159.98   14.20
   5 -13  -2  184.08   12.70
   5 -13  -2  194.28   10.60
  -5 -13   2  216.18   13.80
  -5 -13   2  186.68    9.60
   5  13  -2  200.28   25.20
  -5  13   2  172.58   22.70
   3 -13  -2  138.79   11.30
  -3 -13   2  156.48    8.20
  -3 -13   2  153.28   11.30
  -3 -13   2  148.29   13.20
  -3  13   2  125.09   22.70
   3  13  -2   93.69   22.20
  -1 -13   2  142.69   10.70
   1 -13  -2  151.88   10.20
  -1 -13   2  135.59   12.70
  -1 -13   2  125.79   15.60
  -1 -13   2  150.68    7.70
   1 -13  -2  153.68   12.00
  -1  13   2  137.69   26.30
   1 -13   2   76.09    9.90
  -1 -13  -2   92.69   10.10
   1 -13   2   95.29    8.60
  -1 -13  -2   80.19    7.90
   1 -13   2   77.39    5.30
   1 -13   2   56.09   11.80
  -1  13  -2   78.89   20.60
   1  13   2   54.49   16.10
   3 -13   2  508.05   20.50
  -3 -13  -2  511.95   27.50
   3 -13   2  467.75   24.60
   3 -13   2  450.55   28.90
  -3 -13  -2  455.15   20.80
   3 -13   2  500.35   16.30
  -3  13  -2  470.05   37.50
   3  13   2  438.76   36.20
   5 -13   2  145.89   16.50
   5 -13   2  145.19   12.90
  -5 -13  -2  145.19   12.20
  -5 -13  -2  136.19    6.60
  -5 -13  -2  133.39   10.70
  -5  13  -2  101.99   20.20
 -24   0   3    0.30    3.20
 -24   0   3    0.90    2.10
 -22   0   3   -1.40    2.10
 -22   0   3   -2.30    2.70
 -22   0   3   -1.20    1.60
 -20   0   3   -1.30    1.80
 -20   0   3    1.50    1.70
 -20   0   3    0.50    2.50
 -20   0   3    1.30    2.00
 -18   0   3    1.70    2.40
 -18   0   3    2.50    1.50
 -18   0   3   -0.10    1.30
 -18   0   3    0.00    1.70
  16   0  -3    0.50    1.30
 -16   0   3    0.40    1.40
 -16   0   3   -0.20    1.40
 -16   0   3    1.60    1.50
 -16   0   3   -0.10    2.00
 -14   0   3    0.40    1.20
 -14   0   3   -1.20    1.10
  14   0  -3    0.80    1.20
 -14   0   3   -0.90    1.40
 -14   0   3    1.50    1.40
 -12   0   3   -0.50    1.30
 -12   0   3   -0.90    0.90
 -12   0   3    4.80    1.60
 -12   0   3   -0.40    1.10
 -10   0   3    0.70    0.90
 -10   0   3    0.30    1.10
 -10   0   3   -0.40    0.80
  -8   0   3   -0.60    0.70
  -8   0   3    0.10    0.80
  -8   0   3    0.90    0.90
  -8   0   3    1.20    0.90
  -6   0   3   -1.00    0.80
  -6   0   3   -0.20    1.10
  -4   0   3   -4.50   17.70
  -2   0   3    0.10    1.00
  -2   0   3    0.30    1.30
   0   0   3    0.10    0.90
   0   0  -3   -0.50    1.00
   0   0  -3    0.20    1.30
   0   0   3    0.60    1.30
  -2   0  -3   -1.20    1.20
  -2   0  -3   -1.00    1.10
   2   0   3    1.80    0.70
   2   0   3   -0.60    0.90
   2   0   3   -0.70    1.30
  -4   0  -3    1.10    1.40
   4   0   3    1.10    1.00
   4   0   3   -1.10    1.40
  -4   0  -3    0.50    1.20
   4   0   3    1.50    1.50
  -4   0  -3    1.30    1.00
  -6   0  -3    0.30    1.00
   6   0   3   -0.40    0.60
   6   0   3    0.60    1.00
  -6   0  -3    2.20    1.90
   6   0   3   -0.40    1.40
  -6   0  -3    0.60    1.40
   6   0   3   -0.50    1.20
   8   0   3   -0.50    1.80
  -8   0  -3   -0.60    1.70
   8   0   3    0.40    0.80
  -8   0  -3    0.10    1.10
   8   0   3   -0.10    0.80
   8   0   3   -0.20    1.50
 -10   0  -3    1.60    1.70
 -10   0  -3    2.50    2.20
  10   0   3    0.80    1.40
 -10   0  -3   -0.60    1.00
  10   0   3   -2.60    1.30
  10   0   3    1.40    1.10
  10   0   3   -0.40    0.90
  10   0   3   -0.90    1.70
 -12   0  -3    0.40    1.20
  12   0   3    1.10    2.30
 -12   0  -3    2.30    2.30
  12   0   3    0.60    1.20
  12   0   3   -1.00    1.90
  14   0   3    2.60    2.50
  14   0   3   -1.40    1.90
  14   0   3   -1.60    1.10
 -14   0  -3    1.20    2.70
 -14   0  -3    0.60    1.60
 -16   0  -3    0.20    1.80
  16   0   3    1.60    2.30
  16   0   3   -1.00    2.60
 -16   0  -3   -0.30    2.80
 -18   0  -3    2.80    2.50
  18   0   3   -1.60    2.70
  18   0   3   -0.30    2.10
 -18   0  -3    2.20    3.20
 -20   0  -3   -0.60    3.50
  20   0   3    0.70    2.30
 -20   0  -3    3.30    2.50
 -22   0  -3    2.30    2.60
  22   0   3   -1.80    3.20
 -22   0  -3    4.10    4.90
 -25  -1   3  106.39    6.70
 -25  -1   3   86.99    9.60
 -25  -1   3   97.29    8.00
 -25   1   3  108.39    7.90
 -25   1   3  101.69   10.80
 -23  -1   3   86.79    6.50
 -23  -1   3   91.39    7.40
 -23  -1   3   98.89    6.50
 -23  -1   3  104.29    9.60
 -23   1   3   97.79    7.30
 -23   1   3   96.29    9.60
 -21  -1   3  303.37   15.30
 -21  -1   3  348.77   14.90
 -21  -1   3  350.06   13.50
 -21  -1   3  331.37   16.90
 -21   1   3  357.86   14.40
 -19  -1   3   69.79    6.90
 -19  -1   3   81.99    5.20
 -19  -1   3   68.79    5.90
 -19  -1   3   72.49    5.30
 -19   1   3   70.79    5.50
 -19   1   3   71.39    7.20
 -19   1   3   70.29    5.60
  19   1  -3   69.89    4.50
 -17  -1   3   74.09    4.60
 -17  -1   3   65.69    6.20
 -17  -1   3   74.39    5.60
 -17  -1   3   71.99    5.10
 -17   1   3   64.59    5.10
 -17   1   3   62.79    6.10
 -17   1   3   67.89    5.00
 -17   1   3   68.59    4.20
  17   1  -3   69.99    4.30
 -15  -1   3   14.20    2.80
 -15  -1   3   17.70    2.80
 -15  -1   3   19.00    3.20
 -15  -1   3   21.90    4.20
 -15   1   3   23.20    3.40
  15   1  -3   20.70    3.20
 -15   1   3   26.30    4.60
 -15   1   3   14.40    2.70
 -15   1   3   21.80    3.40
  15   1  -3   18.40    3.10
 -13  -1   3  280.27   10.50
 -13  -1   3  269.67   10.70
 -13  -1   3  266.37   11.10
 -13   1   3  277.07    9.30
 -13   1   3  266.17   10.40
  13   1  -3  262.37    9.70
 -13   1   3  262.87   11.00
 -13   1   3  271.57   10.20
 -11  -1   3  213.18    8.60
 -11  -1   3  200.28    8.60
 -11  -1   3  207.18    8.40
  11   1  -3  195.58    7.60
 -11   1   3  200.58    8.20
 -11   1   3  201.88    8.40
 -11   1   3  197.08    7.30
 -11   1   3  215.08    8.10
  11   1  -3  212.18    7.90
  -9  -1   3  596.84   18.00
  -9  -1   3  612.94   18.80
  -9  -1   3  596.64   18.70
  -9  -1   3  587.94   18.70
  -9   1   3  635.44   18.20
   9   1  -3  610.04   17.80
  -9   1   3  635.84   17.80
  -7  -1   3   40.60    4.50
  -7  -1   3   32.70    2.70
  -7  -1   3   32.90    2.80
  -5  -1   3  114.59    4.90
  -5  -1   3  109.69    5.60
  -5  -1   3  111.99    6.60
  -3  -1   3  263.57    8.80
  -3  -1   3  273.77   10.40
  -3  -1   3  248.08    8.60
  -3  -1   3  258.67   10.10
  -1  -1   3 3794.62   98.89
  -1  -1   3 3662.43   99.29
  -1  -1   3 3689.93   97.79
  -1   1   3 3699.23   96.89
   1   1  -3 3629.64   97.79
   1   1  -3 3798.72   99.49
  -1   1   3 3698.73   99.49
   1   1  -3 3671.13   98.99
   1  -1   3 1053.59   32.90
  -1  -1  -3 1035.20   31.40
   1  -1   3 1026.90   30.50
  -1  -1  -3 1026.70   30.00
   1  -1   3 1111.69   31.40
   1   1   3 1068.39   31.70
  -1   1  -3 1049.89   30.50
   1   1   3 1037.70   28.70
  -1   1  -3 1100.69   31.80
   1   1   3 1030.50   29.70
   3  -1   3 1534.95   44.40
   3  -1   3 1571.74   44.70
  -3  -1  -3 1518.15   44.70
   3  -1   3 1635.94   45.30
   3  -1   3 1535.35   42.10
  -3  -1  -3 1572.94   44.30
   3   1   3 1591.44   45.30
   3   1   3 1567.64   43.60
   3   1   3 1572.54   42.00
  -3   1  -3 1538.15   45.50
  -3   1  -3 1524.75   44.10
  -5  -1  -3  102.39    6.30
   5  -1   3  106.49    6.40
  -5  -1  -3  104.69    6.30
  -5  -1  -3  105.19    4.90
   5  -1   3  109.39    6.70
   5  -1   3   99.39    4.60
   5  -1   3  102.99    6.20
   5   1   3  101.19    6.60
   5   1   3  100.99    4.50
   5   1   3  104.19    5.80
  -5   1  -3  102.09    4.90
  -5   1  -3  100.49    6.10
   7  -1   3 1951.70   55.29
  -7  -1  -3 1948.61   55.89
  -7  -1  -3 1959.10   52.69
   7  -1   3 1951.50   55.59
   7  -1   3 1898.81   52.09
  -7  -1  -3 1861.71   55.09
   7  -1   3 1895.21   54.99
   7   1   3 1874.91   51.99
  -7   1  -3 1919.51   56.89
  -7   1  -3 1872.71   54.79
   7   1   3 1933.51   54.39
   7   1   3 1963.20   52.99
   7   1   3 1894.31   55.49
  -7   1  -3 1987.80   52.69
   9  -1   3 1451.05   40.50
   9  -1   3 1482.55   43.60
  -9  -1  -3 1444.16   43.80
   9  -1   3 1480.35   43.60
   9  -1   3 1427.86   44.00
  -9  -1  -3 1447.36   44.90
  -9  -1  -3 1496.15   41.40
   9   1   3 1493.55   44.40
   9   1   3 1420.86   42.90
   9   1   3 1413.66   40.50
  -9   1  -3 1419.66   43.50
  -9   1  -3 1492.65   46.30
  -9   1  -3 1461.55   41.20
  11  -1   3 1492.25   43.10
 -11  -1  -3 1304.37   44.10
 -11  -1  -3 1354.76   44.70
  11  -1   3 1401.06   39.80
 -11  -1  -3 1436.56   40.80
  11  -1   3 1419.26   43.90
  11   1   3 1371.36   40.30
  11   1   3 1455.25   43.80
 -11   1  -3 1363.56   45.80
 -11   1  -3 1424.56   40.70
  11   1   3 1457.95   43.00
  13  -1   3  263.17   10.10
 -13  -1  -3  251.17   14.30
  13  -1   3  255.37   13.40
  13  -1   3  262.87   12.30
 -13   1  -3  239.98   14.70
 -13   1  -3  268.47   11.10
  13   1   3  252.37   13.20
  13   1   3  273.57   12.40
  15  -1   3  216.48   11.00
 -15  -1  -3  210.98   13.70
  15  -1   3  206.58    9.10
  15  -1   3  194.88   12.10
 -15  -1  -3  203.98   10.10
  15   1   3  227.98   11.10
  15   1   3  200.78   12.00
 -15   1  -3  240.48   15.10
 -15   1  -3  209.78   10.10
 -17  -1  -3   44.50    6.10
  17  -1   3   53.89    5.60
 -17  -1  -3   53.99   10.20
  17  -1   3   47.90    7.80
  17   1   3   48.60    7.50
 -17   1  -3   34.60    8.10
 -17   1  -3   41.40    4.80
  17   1   3   39.00    5.00
 -19  -1  -3  584.94   27.80
 -19  -1  -3  553.14   21.50
  19  -1   3  586.74   21.50
  19  -1   3  602.74   25.10
 -19   1  -3  565.84   28.20
  19   1   3  599.04   24.70
  19   1   3  603.24   21.70
 -19   1  -3  581.34   21.60
  21  -1   3  101.69    9.90
 -21  -1  -3   87.19   10.90
  21  -1   3   94.79    7.20
 -21  -1  -3   86.39    7.30
  21   1   3   95.69    9.60
 -21   1  -3   85.09   11.20
  21   1   3   97.59    6.80
 -21   1  -3   78.49    7.00
  23  -1   3   29.60    7.40
 -23  -1  -3   26.50    4.80
 -23  -1  -3   27.20    8.00
 -23   1  -3   30.30    7.90
 -23   1  -3   23.00    4.80
  23   1   3   35.10    6.90
 -24  -2   3  257.37   11.90
 -24  -2   3  232.28   15.20
 -24  -2   3  264.87   13.30
 -24   2   3  215.38   15.60
 -24   2   3  278.57   12.50
 -22  -2   3  597.24   22.20
 -22  -2   3  592.24   25.00
 -22  -2   3  604.84   21.00
 -22   2   3  551.64   25.30
 -22   2   3  569.34   20.70
 -20  -2   3  120.69    7.50
 -20  -2   3  101.19   16.50
 -20  -2   3   88.79    8.20
 -20   2   3  104.49    9.30
 -20   2   3  100.19    6.60
 -18  -2   3  166.88    9.30
 -18  -2   3  184.68   10.80
 -18  -2   3  190.48    9.40
 -18   2   3  174.08    8.50
 -18   2   3  178.88   11.20
 -16  -2   3  303.07   12.70
 -16  -2   3  306.07   13.90
 -16  -2   3  326.17   12.70
 -16   2   3  301.57   14.00
 -16   2   3  288.37   12.50
  16   2  -3  292.27   11.30
 -16   2   3  310.37   11.70
 -14  -2   3  187.18    9.00
 -14  -2   3  207.88   10.10
 -14  -2   3  208.48    9.30
 -14   2   3  203.38   10.00
  14   2  -3  195.18    8.70
  14   2  -3  183.28    8.10
 -14   2   3  194.28    8.20
 -12  -2   3  507.65   17.20
 -12  -2   3  484.15   16.90
 -12  -2   3  493.85   17.70
  12   2  -3  495.15   16.60
 -12   2   3  517.85   16.00
 -12   2   3  526.45   17.50
 -12   2   3  517.45   17.60
 -10  -2   3  762.92   22.10
 -10  -2   3  720.23   23.30
 -10  -2   3  760.72   23.20
 -10  -2   3  745.33   28.60
 -10  -2   3  744.83   22.80
 -10   2   3  758.02   20.80
  10   2  -3  734.83   22.40
 -10   2   3  747.13   21.60
 -10   2   3  731.53   22.60
  10   2  -3  730.43   22.30
 -10   2   3  775.02   23.00
  -8  -2   3   71.09    6.80
  -8  -2   3   67.19    4.20
  -8  -2   3   68.69    4.50
  -8  -2   3   70.39    4.30
  -8   2   3   68.29    3.30
   8   2  -3   60.59    3.70
   8   2  -3   62.09    3.70
   8   2  -3   64.69    3.90
  -6  -2   3  739.93   26.20
  -6  -2   3  771.42   22.80
  -6  -2   3  752.82   22.60
  -6  -2   3  766.22   23.00
   6   2  -3  756.52   22.70
   6   2  -3  729.13   21.90
  -4  -2   3 1308.17   36.70
  -4  -2   3 1333.27   40.20
  -4  -2   3 1265.77   37.70
  -4  -2   3 1354.86   38.40
   4   2  -3 1277.17   37.40
   4   2  -3 1336.67   40.20
  -2  -2   3  993.80   32.20
  -2  -2   3  977.20   27.80
  -2  -2   3  967.90   27.20
  -2  -2   3  932.41   30.40
   2   2  -3  968.60   27.20
  -2   2   3  949.60   26.50
   2   2  -3 1015.70   31.50
   2   2  -3  964.00   28.90
   0  -2  -3 4090.69  106.69
   0  -2   3 4092.89  109.49
   0  -2   3 4237.88  109.79
   0  -2   3 4050.69  107.49
   0  -2  -3 3997.80  109.79
   0   2  -3 3923.71  107.19
   0   2   3 4003.70  106.69
   0   2   3 4186.58  110.69
   0   2  -3 4046.30  108.79
   0   2   3 4004.60  105.69
   0   2  -3 4138.79  110.89
  -2  -2  -3 2479.55   64.89
  -2  -2  -3 2455.95   66.39
   2  -2   3 2458.45   68.39
   2  -2   3 2486.05   68.39
   2   2   3 2463.15   64.69
   2   2   3 2436.86   66.09
  -2   2  -3 2377.76   67.39
   2   2   3 2456.45   68.69
  -2   2  -3 2507.25   69.69
  -2   2  -3 2415.36   66.69
  -4  -2  -3 1212.08   33.90
   4  -2   3 1218.78   36.30
   4  -2   3 1282.47   37.40
   4  -2   3 1239.48   33.90
  -4  -2  -3 1194.38   37.00
  -4  -2  -3 1221.28   36.00
   4  -2   3 1216.48   37.10
   4   2   3 1235.18   33.70
   4   2   3 1238.58   34.90
   4   2   3 1221.88   35.40
  -4   2  -3 1225.28   36.40
  -4   2  -3 1231.48   36.00
  -6  -2  -3 3168.38   87.59
  -6  -2  -3 3202.18   88.19
   6  -2   3 3133.99   88.09
   6  -2   3 3233.68   88.19
   6  -2   3 3138.79   84.49
   6  -2   3 3223.58   87.89
  -6  -2  -3 3239.98   84.89
   6   2   3 3221.38   88.49
  -6   2  -3 3273.07   90.39
   6   2   3 3226.78   84.49
  -6   2  -3 3073.19   86.99
  -6   2  -3 3216.78   84.99
   6   2   3 3161.68   85.49
  -6   2  -3 3144.79   87.09
   6   2   3 3224.78   86.69
   8  -2   3 2335.07   67.09
   8  -2   3 2468.55   67.19
  -8  -2  -3 2376.86   64.09
  -8  -2  -3 2284.57   67.99
   8  -2   3 2296.87   68.09
  -8  -2  -3 2342.87   67.29
   8  -2   3 2374.06   63.39
  -8   2  -3 2370.86   69.69
   8   2   3 2303.67   65.79
  -8   2  -3 2340.17   65.99
   8   2   3 2379.26   67.49
  -8   2  -3 2417.56   63.99
   8   2   3 2286.07   64.29
   8   2   3 2350.26   63.39
  10  -2   3  909.31   29.00
 -10  -2  -3 1061.79   34.10
 -10  -2  -3 1052.59   30.40
  10  -2   3 1076.09   32.90
  10  -2   3 1004.30   34.20
 -10  -2  -3  944.21   32.50
  10  -2   3 1014.60   33.30
 -10   2  -3 1055.49   36.00
 -10   2  -3 1054.39   30.20
  10   2   3  965.70   30.20
  10   2   3  972.30   31.80
  10   2   3 1044.40   33.40
  12  -2   3 1470.05   41.70
  12  -2   3 1486.75   46.70
 -12  -2  -3 1498.85   47.60
  12  -2   3 1525.35   45.30
 -12   2  -3 1463.45   49.50
  12   2   3 1468.75   46.10
 -12   2  -3 1495.65   42.90
  14  -2   3  525.25   17.80
 -14  -2  -3  530.65   18.70
  14  -2   3  518.35   19.90
  14  -2   3  492.15   21.30
 -14  -2  -3  549.85   23.00
 -14   2  -3  484.15   23.70
  14   2   3  520.45   21.10
 -14   2  -3  502.25   18.10
  16  -2   3  585.34   24.00
  16  -2   3  583.94   21.60
 -16  -2  -3  561.14   25.10
 -16  -2  -3  543.75   20.50
  16  -2   3  551.94   18.50
 -16   2  -3  561.84   20.20
 -16   2  -3  577.84   27.00
  16   2   3  622.74   21.90
  16   2   3  571.44   23.30
  18  -2   3  485.55   22.00
  18  -2   3  471.95   17.70
 -18  -2  -3  413.96   24.80
  18  -2   3  512.55   19.30
 -18  -2  -3  445.96   18.50
  18   2   3  484.95   18.80
 -18   2  -3  496.05   18.50
  18   2   3  501.85   21.40
  20  -2   3  209.08   10.90
 -20  -2  -3  183.18   10.70
  20  -2   3  179.18   13.00
 -20  -2  -3  181.38   14.90
  20   2   3  208.18   10.60
 -20   2  -3  205.68   10.90
  20   2   3  199.68   13.00
 -20   2  -3  166.98   15.30
  22  -2   3   83.19    9.70
 -22  -2  -3   94.99    8.10
  22  -2   3  110.29    7.70
 -22  -2  -3  135.39   13.20
  22   2   3  107.89    7.50
 -22   2  -3  102.39    8.00
 -22   2  -3  107.59   16.80
  22   2   3  108.09   10.30
 -23  -3   3  418.26   17.30
 -23  -3   3  433.96   21.00
 -23  -3   3  407.16   18.00
 -23   3   3  419.46   21.80
 -21  -3   3  304.17   16.30
 -21  -3   3  304.67   13.90
 -21  -3   3  302.27   14.30
 -21   3   3  311.77   17.50
 -21   3   3  318.67   12.90
 -19  -3   3   28.80    5.10
 -19  -3   3   19.30    5.00
 -19  -3   3   32.70    9.60
 -19   3   3   19.30    3.40
 -19   3   3   20.40    5.50
 -17  -3   3  143.09    8.50
 -17  -3   3  164.48    9.90
 -17  -3   3  123.19   12.70
 -17  -3   3  160.48    8.80
 -17   3   3  145.79   10.10
 -17   3   3  146.39    7.30
 -15  -3   3  691.73   23.20
 -15  -3   3  705.23   24.60
 -15  -3   3  716.23   23.70
 -15  -3   3  648.64   30.70
 -15   3   3  682.63   21.30
 -15   3   3  708.33   25.10
 -13  -3   3  844.62   26.70
 -13  -3   3  833.72   34.20
 -13  -3   3  829.12   26.20
 -13  -3   3  834.22   27.50
 -13   3   3  842.62   26.80
 -13   3   3  849.72   27.60
 -13   3   3  884.01   24.40
  13   3  -3  728.83   25.00
 -11  -3   3  514.75   16.90
 -11  -3   3  499.65   17.70
 -11  -3   3  514.35   17.40
 -11  -3   3  499.95   23.50
 -11  -3   3  530.65   18.60
  11   3  -3  511.15   17.40
 -11   3   3  527.35   17.30
 -11   3   3  538.35   18.30
  11   3  -3  502.35   16.80
  11   3  -3  508.25   16.30
 -11   3   3  523.85   15.60
  -9  -3   3  118.49    6.20
  -9  -3   3   97.09    9.00
  -9  -3   3  113.59    5.90
  -9  -3   3  113.29    6.70
  -9  -3   3  103.29    6.10
  -9   3   3  110.89    6.50
  -9   3   3  113.59    4.50
  -9   3   3  111.89    6.20
   9   3  -3  109.89    6.10
   9   3  -3  107.69    5.70
   9   3  -3  118.29    6.10
  -7  -3   3  619.54   20.00
  -7  -3   3  620.84   21.60
  -7  -3   3  619.44   20.60
  -7  -3   3  637.74   25.20
  -7   3   3  636.44   17.40
  -7   3   3  637.04   20.10
   7   3  -3  638.04   19.80
  -7   3   3  634.94   18.30
   7   3  -3  608.74   19.90
   7   3  -3  618.34   19.30
  -5  -3   3 2709.33   73.69
  -5  -3   3 2640.24   77.89
  -5  -3   3 2638.34   72.79
  -5  -3   3 2723.13   74.09
   5   3  -3 2636.44   78.39
   5   3  -3 2676.13   73.39
   5   3  -3 2744.53   72.69
   5   3  -3 2623.94   72.09
  -5   3   3 2750.62   71.19
  -5   3   3 2763.62   73.89
  -3  -3   3 1537.95   44.40
  -3  -3   3 1512.05   43.70
  -3  -3   3 1601.24   47.40
  -3  -3   3 1533.05   41.30
  -3  -3   3 1535.65   42.70
   3   3  -3 1487.55   48.10
   3   3  -3 1498.15   43.80
   3   3  -3 1491.95   41.30
  -3   3   3 1587.04   45.50
  -3   3   3 1532.35   40.10
  -3   3   3 1504.95   41.50
  -1  -3   3  281.37   12.20
  -1  -3   3  303.87   13.40
  -1  -3   3  312.47   10.60
   1  -3  -3  293.07   12.20
   1  -3  -3  311.07   10.00
  -1  -3   3  290.97   10.60
  -1  -3   3  311.07   12.00
  -1   3   3  299.37    8.80
  -1   3   3  337.77   15.20
  -1   3   3  300.97   10.30
  -1   3   3  309.37   10.30
   1   3  -3  294.27   10.30
   1   3  -3  289.37   14.60
   1   3  -3  287.07   11.80
   1  -3   3  558.24   20.20
  -1  -3  -3  558.34   17.40
   1  -3   3  565.54   19.70
  -1  -3  -3  583.14   21.50
  -1  -3  -3  554.34   15.90
  -1   3  -3  558.74   19.00
   1   3   3  566.24   15.80
   1   3   3  554.84   17.20
   1   3   3  549.95   17.40
  -1   3  -3  536.65   17.60
  -1   3  -3  545.45   21.70
   3  -3   3 1296.97   37.90
  -3  -3  -3 1264.57   42.30
   3  -3   3 1318.17   39.20
  -3  -3  -3 1298.37   35.90
  -3  -3  -3 1252.57   37.10
   3  -3   3 1329.77   39.60
   3  -3   3 1285.77   35.30
  -3   3  -3 1284.77   41.30
   3   3   3 1318.27   39.80
   3   3   3 1279.37   34.90
  -3   3  -3 1274.87   38.10
   3   3   3 1253.87   36.30
  -3   3  -3 1244.38   37.10
   3   3   3 1281.77   37.00
   5  -3   3 2123.99   60.29
   5  -3   3 2070.59   56.09
   5  -3   3 2050.59   60.39
  -5  -3  -3 2112.09   56.39
   5  -3   3 2167.18   59.69
  -5  -3  -3 2097.39   60.79
   5   3   3 2081.39   55.99
  -5   3  -3 2109.39   62.79
   5   3   3 2056.49   58.19
   5   3   3 2120.29   60.69
  -5   3  -3 2074.09   58.59
  -5   3  -3 2006.80   59.09
   5   3   3 2077.39   57.39
  -7  -3  -3  775.92   26.30
  -7  -3  -3  816.62   28.90
   7  -3   3  787.42   26.90
  -7  -3  -3  809.52   23.90
   7  -3   3  796.02   26.90
   7  -3   3  823.62   27.80
  -7   3  -3  771.62   25.80
   7   3   3  772.02   25.50
   7   3   3  835.12   24.20
  -7   3  -3  818.62   29.70
   7   3   3  792.02   27.40
  -7   3  -3  775.72   25.80
   7   3   3  795.52   24.60
   9  -3   3  116.09    8.10
   9  -3   3  140.69    9.00
  -9  -3  -3  140.99    8.80
  -9  -3  -3  153.28    7.10
   9  -3   3  154.38    9.10
   9  -3   3  146.69    6.40
  -9  -3  -3  139.49    8.70
   9   3   3  140.89    6.40
   9   3   3  146.99    9.20
  -9   3  -3  146.49    8.90
  -9   3  -3  160.08   11.20
  -9   3  -3  149.49    6.90
   9   3   3  129.39    7.00
 -11  -3  -3  761.62   27.70
  11  -3   3  790.92   26.90
 -11  -3  -3  773.52   24.30
  11  -3   3  761.72   27.50
  11   3   3  747.93   27.10
 -11   3  -3  752.02   23.80
 -11   3  -3  746.33   25.50
 -11   3  -3  774.32   30.60
 -13  -3  -3  821.62   26.20
  13  -3   3  815.32   29.90
 -13  -3  -3  796.52   30.00
  13  -3   3  817.92   28.30
 -13   3  -3  814.62   33.00
 -13   3  -3  809.22   25.70
  13   3   3  815.32   29.10
 -15  -3  -3  384.16   15.10
  15  -3   3  390.06   16.50
 -15  -3  -3  344.77   18.10
  15  -3   3  375.66   18.00
  15   3   3  369.76   17.10
 -15   3  -3  364.16   14.40
 -15   3  -3  336.27   20.10
  17  -3   3  166.78   11.90
  17  -3   3  163.08    7.50
 -17  -3  -3  169.78   12.60
 -17  -3  -3  161.08   10.20
  17  -3   3  157.38   10.00
 -17   3  -3  165.58    9.00
 -17   3  -3  164.68   14.20
  17   3   3  168.18   11.40
  19  -3   3   83.09    5.30
  19  -3   3   97.09    9.70
 -19  -3  -3  104.99   10.60
 -19  -3  -3   98.39    7.50
  19  -3   3   73.29    7.00
  19   3   3   91.99    7.50
 -19   3  -3   89.39   14.10
 -19   3  -3   83.49    6.70
  19   3   3   86.09    8.50
  21  -3   3  264.97   13.20
 -21  -3  -3  228.98   12.80
  21  -3   3  271.87   16.90
 -21  -3  -3  237.28   17.30
  21   3   3  251.77   15.50
 -21   3  -3  233.58   18.90
 -21   3  -3  260.37   12.70
  21   3   3  263.87   12.70
 -23  -3  -3  414.56   18.80
  23  -3   3  432.66   17.80
  23  -3   3  448.46   23.30
 -23  -3  -3  419.86   24.80
 -23   3  -3  410.96   26.60
 -23   3  -3  442.16   18.40
  23   3   3  449.86   21.30
 -24  -4   3   23.30    4.90
 -24  -4   3   16.90    5.00
 -24  -4   3   26.60    6.90
 -24   4   3   18.50    3.70
 -24   4   3   15.90    6.20
 -22  -4   3    7.50    3.60
 -22  -4   3   12.50    5.00
 -22  -4   3    9.60    3.50
 -22   4   3    6.20    2.60
 -22   4   3    0.90    3.70
 -20  -4   3  313.67   16.60
 -20  -4   3  308.77   14.60
 -20  -4   3  325.87   15.00
 -20   4   3  333.37   12.70
 -18  -4   3   89.59    7.10
 -18  -4   3   82.99    7.80
 -18  -4   3   76.09   12.70
 -18   4   3   88.89    5.40
 -18   4   3   92.89    8.80
 -16  -4   3   -0.20    2.30
 -16  -4   3    0.70    2.20
 -16  -4   3    0.20    2.50
 -16   4   3    0.10    2.90
 -16   4   3    0.80    1.30
 -14  -4   3  283.37   19.00
 -14  -4   3  317.67   14.50
 -14  -4   3  308.07   13.50
 -14   4   3  311.47   14.90
 -14   4   3  330.17   10.90
 -14   4   3  315.37   12.00
 -12  -4   3  338.97   13.30
 -12  -4   3  344.67   13.80
 -12  -4   3  333.27   13.90
 -12  -4   3  345.67   14.90
 -12  -4   3  338.37   19.80
 -12   4   3  332.07   14.90
 -12   4   3  371.66   11.30
  12   4  -3  357.26   12.70
 -12   4   3  348.57   13.40
 -10  -4   3  282.07   16.90
 -10  -4   3  289.27   12.80
 -10  -4   3  286.07   11.90
 -10  -4   3  291.07   12.10
  10   4  -3  252.57   11.30
 -10   4   3  296.77    9.10
  10   4  -3  296.87   12.20
 -10   4   3  295.67   13.00
  10   4  -3  293.67   11.30
 -10   4   3  289.57   12.00
  -8  -4   3  820.32   26.40
  -8  -4   3  805.92   31.80
  -8  -4   3  802.02   25.50
  -8  -4   3  827.52   26.10
  -8   4   3  803.72   26.60
   8   4  -3  765.52   24.80
   8   4  -3  763.62   25.00
  -8   4   3  809.92   26.30
  -6  -4   3   -0.10    2.40
  -6  -4   3    2.90    2.20
  -6  -4   3    1.90    1.80
  -6  -4   3    2.30    1.60
  -6   4   3    2.00    1.30
   6   4  -3   -0.10    0.80
  -6   4   3    2.80    1.00
   6   4  -3    0.80    1.40
  -6   4   3    4.50    2.70
   6   4  -3    0.70    3.40
  -4  -4   3   24.40    4.10
  -4  -4   3   20.20    3.50
  -4  -4   3   33.90    6.80
   4  -4  -3   24.00    2.60
  -4  -4   3   21.00    2.80
   4   4  -3   22.60    2.70
   4   4  -3   28.90    2.20
   4   4  -3   33.60    7.50
   4   4  -3   23.70    2.50
  -4   4   3   26.00    2.50
   4   4  -3   23.50    3.60
  -4   4   3   26.00    2.20
  -4   4   3   30.10    5.60
  -2  -4   3 1967.00   56.29
   2  -4  -3 1923.91   55.49
  -2  -4   3 1952.50   58.79
  -2  -4   3 1984.10   55.69
   2  -4  -3 1939.31   52.59
  -2   4   3 1947.61   52.69
   2   4  -3 1991.70   61.59
  -2   4   3 1918.71   53.29
   2   4  -3 1808.32   54.89
  -2   4   3 2058.59   59.69
   2   4  -3 1895.71   52.59
   0  -4   3   27.10    4.50
   0  -4  -3   27.90    1.80
   0  -4  -3   24.30    2.70
   0  -4   3   37.50    5.60
   0  -4   3   31.60    4.90
   0  -4   3   28.90    3.60
   0  -4  -3   34.30    5.70
   0  -4   3   23.90    2.80
   0   4  -3   33.40    9.10
   0   4   3   30.00    2.70
   0   4   3   24.90    2.70
   0   4   3   24.20    6.30
   0   4  -3   27.50    3.30
   0   4  -3   27.50    2.80
   0   4   3   25.30    1.70
  -2  -4  -3   19.70    5.30
   2  -4   3    5.30    2.40
  -2  -4  -3    9.80    1.50
   2  -4   3    8.90    2.70
  -2  -4  -3    8.00    2.20
   2  -4   3    8.20    2.10
   2  -4   3   11.10    2.50
   2  -4   3   10.00    3.20
  -2   4  -3   11.10    3.20
   2   4   3   10.20    2.50
  -2   4  -3    8.00    3.50
  -2   4  -3   10.30    2.10
   2   4   3    9.10    1.90
   2   4   3    9.00    1.40
  -4  -4  -3    1.50    1.00
   4  -4   3    2.60    2.40
   4  -4   3    0.10    1.60
   4  -4   3    1.20    0.80
   4  -4   3    2.10    1.70
   4   4   3   -0.60    2.00
  -4   4  -3    2.00    1.80
   4   4   3   -0.30    1.10
   4   4   3    0.90    0.70
   4   4   3    1.10    1.00
  -4   4  -3    5.70    2.10
   6  -4   3   50.49    5.00
   6  -4   3   48.60    5.50
  -6  -4  -3   52.59   10.20
  -6  -4  -3   39.20    3.20
   6  -4   3   47.00    4.90
   6  -4   3   47.90    3.80
  -6  -4  -3   40.30    4.30
   6   4   3   39.70    2.90
  -6   4  -3   49.10    4.40
  -6   4  -3   44.90    4.40
   6   4   3   39.50    3.70
  -6   4  -3   53.49    8.50
   6   4   3   46.40    5.70
   6   4   3   40.20    3.90
   8  -4   3  143.79    6.20
   8  -4   3  147.49   10.30
   8  -4   3  138.09    9.10
   8  -4   3  140.09    9.00
  -8  -4  -3  130.09    8.40
  -8  -4  -3  155.68    6.90
   8   4   3  135.79    6.20
  -8   4  -3  132.89   10.90
   8   4   3  148.79    9.40
   8   4   3  137.99    7.90
  -8   4  -3  141.19    8.30
 -10  -4  -3  244.88   10.10
  10  -4   3  242.38   12.50
  10  -4   3  241.58   12.80
 -10  -4  -3  249.68   12.70
  10   4   3  236.18   12.80
 -10   4  -3  221.88   11.20
 -10   4  -3  243.08   15.30
 -12  -4  -3  277.87   11.70
  12  -4   3  294.07   15.10
  12  -4   3  279.97   13.90
 -12  -4  -3  274.07   14.50
 -12   4  -3  295.07   11.40
 -12   4  -3  267.47   17.00
  12   4   3  271.87   14.20
 -14  -4  -3    6.40    2.50
 -14  -4  -3    5.40    3.50
  14  -4   3    5.00    2.90
  14  -4   3    3.60    3.10
 -14   4  -3    7.00    4.90
 -14   4  -3    8.00    2.60
  14   4   3   10.50    4.10
  16  -4   3   77.89    5.10
  16  -4   3   80.09    7.60
 -16  -4  -3   77.79    8.50
 -16  -4  -3   79.19    6.40
  16  -4   3   69.29    8.30
 -16   4  -3   89.89   14.10
  16   4   3   57.99    7.20
 -16   4  -3   74.39    5.80
 -18  -4  -3   52.99    5.80
 -18  -4  -3   43.80    7.90
  18  -4   3   64.99    6.50
  18  -4   3   66.79    7.00
  18  -4   3   60.29   10.00
 -18   4  -3   38.50   10.10
 -18   4  -3   53.59    5.40
  18   4   3   59.49    8.20
  20  -4   3   84.59   10.20
 -20  -4  -3  101.29   11.10
  20  -4   3   96.09    8.20
 -20  -4  -3   98.99    7.90
  20  -4   3  104.89    5.70
 -20   4  -3   79.59   13.20
  20   4   3  102.29    8.00
 -20   4  -3   95.99    7.30
  20   4   3   93.69    9.10
  22  -4   3   33.00    8.10
 -22  -4  -3   19.60    6.70
 -22  -4  -3   22.00    4.40
  22  -4   3   17.40    4.50
 -22   4  -3   29.40   10.10
 -22   4  -3   33.00    5.40
  22   4   3   31.50    7.00
  22   4   3   31.50    5.50
 -23  -5   3    8.10    3.60
 -23  -5   3   10.60    4.70
 -23  -5   3   19.00    4.70
 -23   5   3   11.20    2.80
 -23   5   3   14.00    6.20
 -21  -5   3  236.08   13.00
 -21  -5   3  210.58   14.10
 -21  -5   3  205.28   12.10
 -21   5   3  254.17   10.30
 -21   5   3  234.68   16.10
 -19  -5   3    0.40    2.20
 -19  -5   3    6.00    4.00
 -19  -5   3    1.50    3.00
 -19   5   3    2.50    1.80
 -19   5   3    8.80    5.60
 -17  -5   3   39.90    6.40
 -17  -5   3   34.00    6.60
 -17   5   3   34.90    4.00
 -17   5   3   41.00    3.30
 -17   5   3   43.00    8.00
 -15  -5   3  106.49    7.20
 -15  -5   3  104.49    8.50
 -15  -5   3  104.89    7.90
 -15  -5   3   98.09   12.20
 -15   5   3  112.39    9.50
  15   5  -3  100.89    5.90
 -15   5   3  111.29    5.10
 -15   5   3  110.39    6.60
 -13  -5   3   -0.60    1.40
 -13  -5   3   -1.00    2.10
 -13  -5   3   -0.20    2.00
 -13  -5   3   -0.60    2.10
 -13   5   3    0.60    2.40
 -13   5   3   -0.30    1.50
 -13   5   3    0.30    0.90
  13   5  -3    2.90    1.80
 -11  -5   3   50.89    5.20
 -11  -5   3   62.69    6.10
 -11  -5   3   53.89    9.90
 -11  -5   3   54.79    4.60
 -11  -5   3   57.89    5.40
 -11   5   3   49.70    6.10
 -11   5   3   50.39    4.90
  11   5  -3   61.69    4.80
  -9  -5   3  133.79    8.60
  -9  -5   3  135.89    7.90
  -9  -5   3  135.79    7.00
  -9  -5   3  125.59   11.20
  -9  -5   3  127.59    8.20
  -9   5   3  120.29    9.10
  -9   5   3  141.69    9.30
   9   5  -3  134.79    7.40
  -7  -5   3  138.19   11.50
  -7  -5   3  138.99    7.80
  -7  -5   3  134.49    8.60
   7  -5  -3  131.89    6.30
  -7  -5   3  156.28    9.10
  -7   5   3  143.39    7.10
   7   5  -3  153.98    8.10
  -7   5   3  146.89    5.60
  -7   5   3  156.18   10.40
   7   5  -3  137.19    7.80
   7   5  -3  146.39   12.80
   5  -5  -3   47.00    3.30
  -5  -5   3   64.49    7.60
   5  -5  -3   50.89    3.90
  -5  -5   3   45.50    4.20
  -5  -5   3   53.19    5.20
  -5  -5   3   41.60    5.00
  -5   5   3   44.00    3.10
   5   5  -3   47.10    3.00
   5   5  -3   42.10    4.10
   5   5  -3   43.00    3.50
  -5   5   3   60.99    9.00
  -5   5   3   63.19    9.40
   5   5  -3   53.09    5.10
   5   5  -3   70.39   12.10
  -3  -5   3   72.09    5.00
  -3  -5   3   67.09    5.70
  -3  -5   3   60.29    5.80
   3  -5  -3   58.59    5.20
  -3  -5   3   70.49    7.30
   3  -5  -3   64.79    4.10
  -3   5   3   66.49    4.00
   3   5  -3   71.89    4.30
   3   5  -3   83.19   12.60
  -3   5   3   70.39    7.90
  -3   5   3   65.59    4.50
   3   5  -3   64.39    4.90
   3   5  -3   64.89    4.00
  -1  -5   3  703.03   25.30
   1  -5  -3  752.92   26.70
  -1  -5   3  788.32   23.60
  -1  -5   3  765.82   26.40
  -1  -5   3  694.13   27.50
   1  -5  -3  753.32   23.10
  -1   5   3  747.93   23.60
   1   5  -3  734.53   22.80
  -1   5   3  748.13   22.60
  -1   5   3  752.52   30.50
   1   5  -3  758.52   31.30
   1  -5   3  668.43   24.60
  -1  -5  -3  696.63   22.00
   1  -5   3  672.83   21.30
   1  -5   3  700.03   25.80
  -1  -5  -3  698.23   19.10
  -1  -5  -3  702.43   29.20
   1  -5   3  650.63   23.80
  -1   5  -3  722.33   29.60
   1   5   3  653.73   21.90
   1   5   3  688.33   21.20
   1   5   3  669.33   18.90
   1   5   3  674.93   29.60
  -1   5  -3  659.93   21.60
  -1   5  -3  632.54   23.00
   3  -5   3  266.87   10.20
   3  -5   3  230.08   13.10
  -3  -5  -3  254.57   12.50
   3  -5   3  270.87   12.90
  -3  -5  -3  282.07   15.70
  -3  -5  -3  266.37   11.10
  -3  -5  -3  268.87    9.00
   3  -5   3  274.47   12.20
   3  -5   3  274.57   13.40
   3   5   3  261.07    8.70
  -3   5  -3  237.28   11.70
   3   5   3  256.77   10.40
  -3   5  -3  287.97   16.70
   3   5   3  264.77   11.30
  -3   5  -3  261.57   13.10
   5  -5   3    5.10    1.80
   5  -5   3    6.60    2.90
  -5  -5  -3    7.90    1.90
  -5  -5  -3    0.60    3.00
   5  -5   3    4.30    2.30
   5  -5   3    9.90    3.80
  -5  -5  -3    4.20    2.40
  -5  -5  -3    6.80    2.50
   5  -5   3    3.30    2.20
  -5   5  -3    5.40    2.20
  -5   5  -3    6.10    1.90
   5   5   3    9.20    1.70
   5   5   3    9.30    3.40
   5   5   3    4.10    1.80
   5   5   3    4.80    1.90
  -5   5  -3    8.30    4.10
  -7  -5  -3  500.05   18.70
   7  -5   3  511.95   16.10
   7  -5   3  520.35   21.00
   7  -5   3  527.85   16.70
  -7  -5  -3  515.95   16.70
   7  -5   3  562.14   20.80
  -7  -5  -3  512.55   19.70
  -7   5  -3  486.95   20.90
   7   5   3  530.65   21.20
   7   5   3  491.75   18.90
   7   5   3  495.05   16.00
   9  -5   3  107.29    5.50
   9  -5   3  120.79    9.00
  -9  -5  -3  105.79    8.10
   9  -5   3  130.19    6.10
   9  -5   3  121.29    9.00
  -9  -5  -3  119.29    6.30
  -9  -5  -3  109.89    7.50
  -9   5  -3  136.79   11.80
   9   5   3  114.79    9.00
 -11  -5  -3  965.50   33.90
  11  -5   3  922.51   34.30
  11  -5   3  975.10   34.10
 -11  -5  -3 1017.50   30.20
 -11  -5  -3  955.50   32.00
 -11   5  -3 1007.80   39.30
  11   5   3 1004.50   34.30
 -13  -5  -3  112.99    7.00
 -13  -5  -3  111.09    9.40
  13  -5   3  101.49    9.50
  13  -5   3  123.39    9.50
  13   5   3  113.09    9.20
 -13   5  -3  121.69   12.20
 -15  -5  -3   -1.00    2.60
  15  -5   3   -0.20    3.30
 -15  -5  -3    2.50    2.40
  15  -5   3    2.50    3.40
 -15   5  -3    5.40    4.90
 -15   5  -3    5.30    2.30
  15   5   3    0.70    2.70
  17  -5   3    7.70    4.10
 -17  -5  -3    2.90    3.50
  17  -5   3    1.60    4.10
 -17  -5  -3    3.20    2.50
  17  -5   3    7.60    2.00
 -17   5  -3    4.90    2.60
  17   5   3    2.60    3.40
 -17   5  -3    0.10    4.10
  19  -5   3  188.28   11.90
 -19  -5  -3  177.18   10.60
  19  -5   3  161.38   13.70
 -19  -5  -3  163.98   13.40
  19   5   3  177.58   12.40
 -19   5  -3  178.48    9.70
 -19   5  -3  181.28   17.00
 -21  -5  -3    9.80    5.40
  21  -5   3   11.30    4.40
  21  -5   3   10.20    5.20
 -21  -5  -3    9.30    3.90
  21   5   3   11.40    4.80
 -21   5  -3   16.50    8.00
 -21   5  -3    6.40    3.20
 -22  -6   3   24.20    5.10
 -22  -6   3   39.70    9.00
 -22  -6   3   28.10    5.90
 -22   6   3   39.20    9.00
 -22   6   3   30.40    3.90
 -20  -6   3  760.12   28.30
 -20  -6   3  722.33   26.90
 -20  -6   3  739.93   30.20
 -20   6   3  768.82   33.20
 -20   6   3  751.72   23.00
 -18  -6   3  354.46   18.30
 -18  -6   3  330.47   18.60
 -18  -6   3  354.16   15.80
 -18   6   3  367.86   14.50
 -18   6   3  394.76   12.60
 -16  -6   3    5.30    3.30
 -16   6   3    9.80    3.10
  16   6  -3    6.40    2.50
 -16   6   3   10.90    1.90
 -16   6   3    4.70    4.10
 -14  -6   3   77.09    7.10
 -14  -6   3   70.79    7.40
 -14  -6   3   79.99    6.30
 -14   6   3   78.69    6.20
 -14   6   3   83.89    8.90
  14   6  -3   92.09    6.90
 -12  -6   3  300.87   15.30
  12  -6  -3  303.27   11.40
 -12  -6   3  330.77   14.60
 -12  -6   3  293.67   20.00
 -12  -6   3  309.47   12.90
 -12  -6   3  312.67   14.90
 -12   6   3  329.57   17.40
  12   6  -3  316.97   13.10
 -12   6   3  305.97   13.70
  10  -6  -3  961.00   28.50
 -10  -6   3 1012.10   29.90
 -10  -6   3  999.40   32.80
 -10  -6   3 1005.80   33.30
 -10  -6   3  929.61   39.10
  10  -6  -3  822.12   27.80
 -10  -6   3  977.70   31.50
 -10   6   3 1015.50   36.40
 -10   6   3  938.21   31.50
  10   6  -3  952.30   30.60
  -8  -6   3 1504.45   45.50
   8  -6  -3 1478.95   40.90
  -8  -6   3 1467.25   41.80
  -8  -6   3 1430.66   45.20
  -8  -6   3 1437.76   52.19
   8  -6  -3 1432.86   41.40
  -8  -6   3 1402.56   43.30
  -8   6   3 1441.46   48.90
   8   6  -3 1376.56   43.10
  -8   6   3 1462.55   42.20
  -8   6   3 1439.26   39.10
   8   6  -3 1554.84   55.29
  -8   6   3 1329.87   43.90
  -6  -6   3   31.20    5.90
   6  -6  -3   23.80    2.90
   6  -6  -3   23.60    3.10
  -6  -6   3   22.80    3.90
  -6  -6   3   23.10    5.20
   6   6  -3   27.10    7.10
  -6   6   3   22.10    6.60
  -6   6   3   24.20    2.40
   6   6  -3   26.70    2.50
  -6   6   3   18.10    3.90
  -6   6   3   27.70    3.40
   6   6  -3   20.80    3.80
   4  -6  -3   31.80    3.30
   4  -6  -3   34.50    4.10
  -4  -6   3   29.90    4.30
  -4  -6   3   29.10    5.60
  -4  -6   3   35.80    6.20
   4   6  -3   32.20    4.90
   4   6  -3   25.10    8.20
  -4   6   3   43.30    8.90
  -4   6   3   30.20    2.80
  -4   6   3   30.20    3.60
  -4   6   3   29.70    4.90
   4   6  -3   33.20    3.10
   2  -6  -3 1887.61   58.99
   2  -6  -3 2070.79   55.79
  -2  -6   3 2054.99   59.19
  -2  -6   3 2048.30   56.29
   2   6  -3 2085.39   68.19
  -2   6   3 2044.50   54.69
  -2   6   3 2087.89   56.59
   2   6  -3 2035.90   55.09
  -2   6   3 1961.60   62.39
  -2   6   3 1946.01   65.09
   2   6  -3 1765.62   57.09
   2   6  -3 1784.92   54.59
   0  -6   3 1956.30   54.89
   0  -6  -3 1988.30   51.19
   0  -6  -3 1768.82   59.49
   0  -6   3 1886.11   58.79
   0  -6   3 1845.12   60.19
   0  -6  -3 2003.80   55.29
   0  -6  -3 2030.80   54.89
   0  -6   3 2057.49   58.69
   0   6  -3 1972.00   66.19
   0   6   3 1902.51   55.49
   0   6   3 1957.40   54.09
   0   6  -3 1939.41   54.69
   0   6   3 1963.10   65.89
   2  -6   3  859.31   32.10
   2  -6   3  887.61   30.80
   2  -6   3  882.61   27.30
  -2  -6  -3  920.51   28.20
   2  -6   3  869.81   31.40
  -2  -6  -3  886.61   28.50
  -2  -6  -3  910.21   24.90
  -2   6  -3  914.61   28.20
  -2   6  -3  894.31   37.20
   2   6   3  836.32   27.00
   2   6   3  909.61   24.70
   2   6   3  895.51   28.70
   4  -6   3  122.49    6.40
  -4  -6  -3  116.49    7.50
   4  -6   3  114.39    8.60
  -4  -6  -3  118.79    7.30
   4  -6   3  116.19    5.30
  -4  -6  -3  110.19    5.20
   4  -6   3  110.59    8.90
  -4   6  -3  125.49   12.30
   4   6   3  106.59    7.10
  -4   6  -3  102.49    6.90
   4   6   3  122.99    5.10
  -6  -6  -3   16.00    2.50
   6  -6   3   17.00    5.20
   6  -6   3   15.00    4.20
  -6  -6  -3   22.20    4.30
  -6  -6  -3   14.40    4.00
   6  -6   3   13.30    2.10
   6  -6   3   23.00    3.50
   6   6   3   23.80    5.30
   6   6   3   19.10    4.10
  -6   6  -3   15.40    5.90
   8  -6   3 1124.49   38.50
   8  -6   3 1208.78   39.60
   8  -6   3 1025.50   32.50
   8  -6   3 1180.68   33.50
  -8  -6  -3 1144.09   36.50
  -8  -6  -3 1181.28   37.80
  -8  -6  -3 1185.48   33.60
   8  -6   3 1151.98   38.90
   8   6   3 1105.79   33.80
   8   6   3 1199.98   39.40
  -8   6  -3 1139.69   44.30
  10  -6   3 1958.00   62.89
  10  -6   3 2034.10   62.79
 -10  -6  -3 2023.60   57.19
 -10  -6  -3 2078.99   62.09
  10  -6   3 2102.69   56.39
  10  -6   3 2102.09   62.79
 -10  -6  -3 2009.30   60.09
 -10   6  -3 1982.60   68.79
  10   6   3 2069.19   62.59
 -12  -6  -3  103.09    8.10
 -12  -6  -3  109.79    9.20
  12  -6   3  106.19    5.60
  12  -6   3  106.99    9.90
 -12  -6  -3  104.89    6.70
  12  -6   3  107.39    9.10
  12  -6   3   91.39    8.80
 -12   6  -3  102.19   11.80
  12   6   3   96.19    9.00
  14  -6   3   58.49    8.80
 -14  -6  -3   33.10    4.50
  14  -6   3   58.19    9.70
 -14  -6  -3   35.70    7.10
  14  -6   3   44.60    3.50
  14   6   3   53.49    8.50
 -14   6  -3   28.70    7.80
 -16  -6  -3  106.09    7.70
  16  -6   3  103.89    5.30
  16  -6   3  119.89   10.00
 -16   6  -3  112.19   13.30
  16   6   3  109.69    9.60
 -18  -6  -3  159.18    9.90
 -18  -6  -3  173.68   13.70
  18  -6   3  152.88   11.50
  18   6   3  174.18   12.20
 -18   6  -3  168.08   16.80
  20  -6   3  695.63   28.00
 -20  -6  -3  698.63   31.60
 -20  -6  -3  675.83   25.60
  20   6   3  670.63   28.00
 -20   6  -3  732.63   37.50
 -21  -7   3  147.29   10.30
 -21  -7   3  125.69   11.70
 -21  -7   3  159.18   11.60
 -21   7   3  142.69    6.70
 -21   7   3  150.18   14.50
 -19  -7   3  515.35   22.00
 -19  -7   3  487.05   20.40
 -19  -7   3  540.25   24.20
 -19   7   3  513.25   15.90
 -19   7   3  471.75   26.00
 -17  -7   3   43.80    7.10
 -17  -7   3   65.59   10.10
 -17  -7   3   46.10    5.50
 -17   7   3   48.70    9.80
  17   7  -3   43.50    4.80
 -15  -7   3  510.25   19.80
 -15  -7   3  507.95   22.60
 -15   7   3  515.95   25.70
 -13  -7   3  593.04   20.90
  13  -7  -3  569.04   19.10
 -13  -7   3  582.84   24.10
 -13  -7   3  545.85   22.30
 -13   7   3  575.24   27.30
 -11  -7   3  534.55   19.10
 -11  -7   3  528.65   22.40
  11  -7  -3  538.35   18.00
 -11  -7   3  533.45   22.40
 -11  -7   3  546.75   21.10
 -11   7   3  495.35   25.30
   9  -7  -3  569.94   19.00
  -9  -7   3  568.74   21.50
  -9  -7   3  574.44   23.40
  -9  -7   3  569.24   19.60
  -9  -7   3  576.84   23.30
  -9   7   3  559.44   20.00
  -9   7   3  557.74   27.00
  -7  -7   3 1250.57   40.80
  -7  -7   3 1336.27   43.80
  -7  -7   3 1306.67   43.10
  -7  -7   3 1366.36   38.90
   7  -7  -3 1334.87   38.80
   7   7  -3 1339.27   53.29
  -7   7   3 1323.67   36.80
  -7   7   3 1307.27   48.30
  -7   7   3 1321.77   40.20
   7   7  -3 1350.26   37.20
  -5  -7   3  155.18    9.00
   5  -7  -3  161.58    8.10
  -5  -7   3  149.99   10.70
  -5  -7   3  145.29   14.10
  -5  -7   3  160.68   10.40
  -5   7   3  160.78   14.00
   5   7  -3  157.08   15.40
   5   7  -3  156.48    7.20
  -5   7   3  162.68    7.00
  -5   7   3  156.58    8.60
  -3  -7   3  951.70   30.90
  -3  -7   3  981.30   33.70
   3  -7  -3  992.00   30.40
  -3  -7   3  937.61   34.40
  -3  -7   3  948.81   43.00
  -3   7   3 1003.50   31.20
  -3   7   3  915.51   39.40
   3   7  -3  963.10   29.30
   3   7  -3 1034.20   43.10
  -1  -7   3  339.67   13.70
  -1  -7   3  327.17   15.90
  -1  -7   3  346.17   17.00
   1  -7  -3  326.97   14.70
   1  -7  -3  344.37   13.10
   1   7  -3  351.86   22.50
  -1   7   3  312.27   12.20
  -1   7   3  316.57   20.90
  -1   7   3  310.97   13.70
   1  -7   3  580.74   24.60
  -1  -7  -3  623.64   21.60
   1  -7   3  612.74   24.10
   1  -7   3  600.44   20.70
  -1  -7  -3  625.74   17.30
  -1  -7  -3  621.34   21.00
  -1   7  -3  618.84   31.00
   1   7   3  571.74   21.40
   1   7   3  582.34   30.80
  -1   7  -3  599.94   20.80
  -3  -7  -3  708.13   20.30
   3  -7   3  691.13   22.70
  -3  -7  -3  709.53   23.80
   3  -7   3  678.93   26.40
  -3  -7  -3  681.33   24.30
   3  -7   3  670.23   27.30
  -3   7  -3  686.23   33.40
   3   7   3  693.33   19.90
   3   7   3  698.03   24.50
   5  -7   3  312.87   16.20
  -5  -7  -3  334.57   11.50
  -5  -7  -3  348.47   14.50
   5  -7   3  312.77   11.30
   5  -7   3  348.87   13.00
  -5  -7  -3  352.36   15.30
   5  -7   3  318.57   17.00
   5   7   3  303.07   14.60
  -5   7  -3  377.96   22.90
   5   7   3  330.27   11.10
   7  -7   3   10.90    4.30
   7  -7   3   16.10    2.70
  -7  -7  -3   18.30    4.80
  -7  -7  -3   21.10    4.80
  -7  -7  -3   15.00    2.60
   7  -7   3   21.90    6.20
   7  -7   3   17.70    3.20
  -7   7  -3   17.60    7.40
   7   7   3   10.00    5.20
   7   7   3   16.60    2.40
  -9  -7  -3  571.64   22.70
   9  -7   3  543.75   23.60
   9  -7   3  537.65   23.90
  -9  -7  -3  522.55   21.10
  -9  -7  -3  557.34   18.50
   9  -7   3  551.34   18.20
   9   7   3  535.85   23.50
  -9   7  -3  572.74   29.60
  11  -7   3  289.77   16.20
 -11  -7  -3  273.17   14.20
 -11  -7  -3  298.67   15.90
  11  -7   3  311.27   11.30
 -11  -7  -3  283.27   12.00
  11  -7   3  289.07   16.40
  11   7   3  270.37   15.60
 -11   7  -3  280.47   20.30
 -13  -7  -3  416.06   20.20
  13  -7   3  410.86   20.40
 -13  -7  -3  386.56   15.80
  13  -7   3  422.66   20.50
  13  -7   3  424.66   14.20
 -13   7  -3  387.56   28.50
  13   7   3  406.76   19.60
 -15  -7  -3  121.29    9.50
  15  -7   3  119.69   10.60
  15  -7   3  115.99   10.50
  15  -7   3  117.69    5.80
 -15  -7  -3  111.69    8.50
  15   7   3  113.69    9.90
 -15   7  -3  106.39   18.10
 -17  -7  -3   23.50    5.00
  17  -7   3   16.60    5.50
 -17  -7  -3   19.20    6.10
  17  -7   3   16.50    5.90
  17   7   3   14.20    5.70
 -17   7  -3   14.40    7.50
  19  -7   3   72.49    8.60
  19  -7   3   74.19    9.30
 -19  -7  -3   89.39    7.60
 -19  -7  -3   84.39   10.60
 -19   7  -3   66.99   13.20
  19   7   3   70.99    8.60
 -20  -8   3  103.99    9.80
 -20  -8   3  102.79   11.00
 -20  -8   3  112.79    8.90
 -20   8   3  100.79   13.30
 -18  -8   3  164.78   11.70
 -18  -8   3  166.58   13.00
 -18  -8   3  157.48   10.10
 -18   8   3  148.59   15.20
  16  -8  -3  184.68    9.70
 -16  -8   3  230.68   12.00
 -16  -8   3  250.77   15.30
 -16  -8   3  255.97   14.10
 -16   8   3  235.58   18.50
 -14  -8   3   16.10    5.50
 -14  -8   3   20.30    5.70
 -14  -8   3   13.10    3.20
  14  -8  -3   24.20    3.60
 -14   8   3   19.00    7.90
 -12  -8   3  314.07   13.70
 -12  -8   3  302.87   18.40
  12  -8  -3  330.97   13.00
 -12   8   3  326.77   21.10
 -10  -8   3  733.03   29.30
 -10  -8   3  717.93   26.80
 -10  -8   3  721.63   24.40
 -10  -8   3  727.13   28.70
  10  -8  -3  755.02   24.10
 -10   8   3  713.93   33.90
  -8  -8   3  209.08   11.70
  -8  -8   3  195.48   12.70
  -8  -8   3  227.08   14.20
   8  -8  -3  224.48   10.30
  -8  -8   3  221.28   10.10
   8   8  -3  219.48   20.00
   8   8  -3  207.08    8.60
  -8   8   3  221.18   11.10
  -8   8   3  217.68    8.10
  -8   8   3  215.58   17.30
  -6  -8   3  258.37   12.70
   6  -8  -3  249.28   11.40
  -6  -8   3  276.27   15.50
  -6  -8   3  235.88   13.90
  -6   8   3  272.37   19.50
  -6   8   3  247.48   12.00
  -6   8   3  243.78    9.50
   6   8  -3  233.48   20.70
   6   8  -3  262.77   10.30
  -4  -8   3  131.29    8.50
  -4  -8   3  134.39   10.10
  -4  -8   3  122.59   10.40
   4  -8  -3  145.89    8.20
  -4   8   3  131.79    8.30
  -4   8   3   99.49   13.10
   4   8  -3  146.59   16.10
  -4   8   3  140.49    6.70
   4   8  -3  126.69    7.80
  -2  -8   3   92.29    8.40
  -2  -8   3   82.79    8.80
   2  -8  -3   84.29    5.90
  -2  -8   3   79.79    6.50
  -2   8   3   80.59    5.70
   2   8  -3  121.19   19.40
  -2   8   3  101.89   13.20
   2   8  -3   93.99    6.10
  -2   8   3   84.99    6.70
   0  -8   3  515.55   18.80
   0  -8   3  495.65   21.70
   0  -8  -3  499.55   18.30
   0  -8   3  453.85   22.30
   0  -8  -3  513.35   19.30
   0   8   3  478.15   28.60
   0   8  -3  524.95   30.20
   0   8   3  470.45   19.10
  -2  -8  -3  218.08   11.60
  -2  -8  -3  224.48    8.30
   2  -8   3  216.78   14.30
  -2  -8  -3  219.68   11.00
   2  -8   3  241.28   14.00
   2  -8   3  224.68   10.80
  -2   8  -3  235.88   19.60
   2   8   3  229.18   20.10
   2   8   3  205.88   11.30
   4  -8   3    8.30    4.10
   4  -8   3   18.50    3.70
   4  -8   3   15.90    5.10
  -4  -8  -3    8.30    2.90
  -4  -8  -3    9.50    3.50
  -4  -8  -3   18.80    2.50
  -4   8  -3   14.00    9.30
  -6  -8  -3   76.09    4.70
   6  -8   3   70.49    8.00
   6  -8   3   79.19    5.70
  -6  -8  -3   86.49    7.70
  -6  -8  -3   72.59    6.70
   6  -8   3   83.39    9.20
  -6   8  -3  102.19   17.10
   6   8   3   67.69    8.50
   6   8   3   78.59    4.30
  -8  -8  -3   11.00    3.90
   8  -8   3    8.00    4.10
   8  -8   3   15.00    3.10
  -8  -8  -3   12.10    3.90
   8  -8   3   11.20    4.90
  -8  -8  -3   12.90    2.80
   8   8   3   10.30    4.90
  -8   8  -3   12.90    7.50
  10  -8   3   67.79    8.80
 -10  -8  -3   84.89    5.80
 -10  -8  -3   97.69    8.90
 -10  -8  -3   62.99    6.90
  10  -8   3   69.49    8.40
  10  -8   3   80.29    5.50
 -10   8  -3  102.69   17.40
  10   8   3   76.59    8.80
 -12  -8  -3  138.29   11.40
  12  -8   3  120.89   11.40
  12  -8   3  136.59    7.00
 -12  -8  -3  127.99    9.90
  12  -8   3  148.19   11.80
 -12  -8  -3  138.49    8.10
  12   8   3  161.48   12.00
 -12   8  -3  146.59   16.10
  14  -8   3   11.00    5.50
 -14  -8  -3    8.90    4.10
  14  -8   3    4.10    1.90
  14  -8   3   10.90    5.40
 -14   8  -3    5.20    6.10
  14   8   3    0.40    3.50
 -16  -8  -3   -0.40    2.50
 -16  -8  -3    1.30    2.30
  16  -8   3   -2.10    3.00
 -16  -8  -3    2.60    3.60
 -16   8  -3   -3.50    5.40
  16   8   3   -4.10    3.40
  18  -8   3  220.18   15.20
 -18  -8  -3  230.68   16.50
  18  -8   3  203.88   17.20
 -18  -8  -3  202.78   11.60
 -18   8  -3  183.98   19.40
  18   8   3  212.88   14.00
 -17  -9   3   62.19   10.10
 -17  -9   3   60.89    6.60
 -17  -9   3   62.79    9.30
 -17   9   3   49.00   12.10
 -15  -9   3   12.30    4.40
  15  -9  -3   16.40    3.10
 -15  -9   3   18.10    6.20
 -15  -9   3   10.00    3.40
 -15   9   3    9.50    7.80
  13  -9  -3   87.59    6.30
 -13  -9   3   82.99    8.30
 -13  -9   3   91.49    7.20
 -13  -9   3   91.29    9.70
 -13   9   3   64.89   12.90
 -11  -9   3   72.09    6.10
 -11  -9   3   64.59    8.10
 -11  -9   3   74.09    9.20
  11  -9  -3   77.59    6.00
 -11  -9   3   71.09    7.60
 -11   9   3   65.79   16.20
   9  -9  -3   57.09    5.30
  -9  -9   3   56.79    5.40
  -9  -9   3   66.89    9.90
  -9  -9   3   61.79   11.50
  -9   9   3   60.29    3.60
  -9   9   3   46.30   11.50
   9   9  -3   76.39   16.80
  -7  -9   3    2.70    3.20
   7  -9  -3    4.30    2.70
  -7  -9   3   -0.30    2.20
  -7  -9   3    4.10    2.90
  -7  -9   3    1.10    3.50
   7   9  -3   -0.10    1.90
   7   9  -3    4.40    8.00
  -7   9   3   10.80    7.40
  -5  -9   3    5.20    4.00
  -5  -9   3    5.60    3.20
   5  -9  -3    4.90    2.60
  -5  -9   3    3.40    3.50
  -5   9   3    5.70    7.50
  -5   9   3    3.10    2.60
  -5   9   3    5.00    1.80
   5   9  -3    3.50    5.00
   5   9  -3    4.50    2.20
  -3  -9   3   83.29    9.40
   3  -9  -3   65.29    6.20
  -3  -9   3   68.29    6.50
  -3  -9   3   76.69    8.20
   3  -9  -3   62.19    5.40
   3   9  -3   57.09    5.90
  -3   9   3   74.69    6.50
  -3   9   3   50.29   12.20
   3   9  -3  108.89   19.50
   1  -9  -3   10.60    3.80
  -1  -9   3    6.20    4.10
   1  -9  -3    1.10    2.10
  -1  -9   3    9.30    4.70
  -1  -9   3    5.60    3.00
   1   9  -3   13.80    9.30
  -1   9   3    6.20    6.00
  -1   9   3    9.50    3.60
   1  -9   3  158.08    9.30
   1  -9   3  164.58   12.00
   1  -9   3  132.19   11.80
  -1  -9  -3  161.48    9.40
  -1  -9  -3  152.88    9.70
  -1   9  -3  160.28   17.70
   1   9   3  141.29   17.00
  -3  -9  -3   47.40    6.40
  -3  -9  -3   56.29    6.30
   3  -9   3   56.79    9.20
  -3  -9  -3   56.29    3.50
   3  -9   3   39.30    7.70
   3  -9   3   52.49    5.50
   3   9   3   44.00   11.20
  -3   9  -3   54.19   14.00
  -5  -9  -3   77.59    4.60
   5  -9   3   71.49    9.20
  -5  -9  -3   70.09    7.40
   5  -9   3   59.69    7.70
   5  -9   3   86.99    6.40
  -5  -9  -3   76.39    7.10
  -5   9  -3   63.59   13.10
   7  -9   3    1.90    3.30
  -7  -9  -3    0.10    2.70
   7  -9   3   -0.90    3.60
   7  -9   3    0.60    2.10
  -7  -9  -3    0.00    1.60
  -7  -9  -3    0.50    2.80
   7   9   3   -1.40    3.60
  -7   9  -3    0.10    4.60
   9  -9   3   -0.70    3.00
  -9  -9  -3    0.50    1.80
   9  -9   3   -1.70    2.00
   9  -9   3   -2.80    3.00
  -9  -9  -3    5.00    3.80
  -9  -9  -3    4.80    3.20
   9   9   3   -1.70    3.70
  11  -9   3   10.20    7.30
 -11  -9  -3   12.20    4.00
  11  -9   3   17.00    6.60
 -11  -9  -3   13.10    3.10
  11  -9   3   13.00    3.00
 -11  -9  -3   17.80    6.30
 -11   9  -3   11.80    8.90
  11   9   3    7.50    4.50
 -13  -9  -3    0.30    3.00
  13  -9   3    1.00    4.10
  13  -9   3    7.60    5.60
 -13  -9  -3    1.60    2.40
 -13  -9  -3    3.70    3.90
  13  -9   3    1.20    1.60
  13   9   3   -0.90    3.30
 -13   9  -3    2.80    6.40
 -15  -9  -3  104.69    7.70
 -15  -9  -3  107.19   10.90
  15  -9   3  106.39   11.20
  15  -9   3  122.59   12.00
 -15  -9  -3  106.29    9.80
  15   9   3  106.29   19.30
 -15   9  -3   94.09   17.00
 -17  -9  -3    5.60    4.10
  17  -9   3    8.70    5.40
  17  -9   3    2.90    4.00
 -17  -9  -3    7.90    4.70
 -17  -9  -3    4.30    3.20
  17   9   3    4.40    4.10
 -17   9  -3    8.10    8.10
 -16 -10   3  103.09   11.00
 -16 -10   3   86.79    9.20
 -16 -10   3  101.39    8.10
 -16  10   3  108.09   18.40
 -14 -10   3  102.59    9.70
 -14 -10   3  112.49   11.20
  14 -10  -3  118.19    7.60
 -14 -10   3  128.49    8.90
 -14  10   3  135.49   16.20
 -12 -10   3  273.17   13.10
 -12 -10   3  283.37   15.70
  12 -10  -3  278.67   12.80
 -12 -10   3  265.97   17.10
 -12  10   3  285.97   22.90
 -10 -10   3  205.88   16.10
 -10 -10   3  200.78   14.20
  10 -10  -3  209.98   10.80
 -10 -10   3  181.48   12.20
 -10  10   3  203.88   19.40
  10  10  -3  180.68    9.00
  -8 -10   3   51.79    5.20
  -8 -10   3   45.50    6.70
  -8 -10   3   36.30    6.70
  -8 -10   3   58.09   10.30
   8 -10  -3   52.89    5.80
  -8  10   3   41.40   12.30
  -8  10   3   44.70    8.10
   8  10  -3   60.69   16.80
  -8  10   3   49.70    3.70
   8  10  -3   45.70    4.60
  -6 -10   3   78.99    8.90
  -6 -10   3   93.29    6.40
   6 -10  -3   84.49    6.90
  -6 -10   3   74.69   13.60
  -6 -10   3   92.99   10.80
   6  10  -3   76.19   15.50
   4 -10  -3  162.48   10.10
  -4 -10   3  174.78   12.80
   4 -10  -3  170.28    9.10
  -4 -10   3  169.68   10.90
  -4 -10   3  168.78   14.10
   4  10  -3  177.38   19.90
  -4  10   3  135.29   24.10
  -2 -10   3  186.38   14.60
   2 -10  -3  172.78    9.70
  -2 -10   3  183.98   11.00
  -2 -10   3  222.28   14.40
   2 -10  -3  178.18   11.00
   2  10  -3  226.98   22.60
  -2  10   3  152.58   18.80
   0 -10  -3  156.78   10.50
   0 -10  -3  166.58    9.70
   0 -10   3  162.78   10.00
   0 -10   3  203.78   23.50
   0 -10   3  157.18   12.30
   0  10   3  134.29   24.60
   0  10  -3  106.69   18.80
  -2 -10  -3   48.40    7.60
   2 -10   3   41.80    8.80
  -2 -10  -3   45.90    6.70
   2 -10   3   32.70   12.80
   2 -10   3   37.20    5.60
  -2  10  -3   30.60   11.20
  -4 -10  -3    4.70    3.60
  -4 -10  -3    5.10    3.40
   4 -10   3    4.30    2.90
  -4 -10  -3    4.70    1.70
   4 -10   3    4.70    4.00
   4 -10   3    0.60    3.30
  -4  10  -3   -5.70    4.20
   6 -10   3   96.09   10.20
  -6 -10  -3  103.79    9.50
  -6 -10  -3   95.79    8.50
   6 -10   3  108.29   11.60
   6 -10   3  117.89    7.80
  -6 -10  -3  112.09    5.90
  -6  10  -3  116.29   25.60
   8 -10   3   31.90    6.90
  -8 -10  -3   43.40    6.80
  -8 -10  -3   51.29    4.50
   8 -10   3   44.80    5.00
  -8 -10  -3   64.49    8.00
   8 -10   3   39.90    8.00
   8  10   3   51.49    9.60
  -8  10  -3   44.00   11.90
  10 -10   3   68.19    5.50
  10 -10   3   65.49    8.60
 -10 -10  -3   65.79    5.50
 -10 -10  -3   52.09    8.30
  10 -10   3   72.89   12.30
 -10 -10  -3   55.79    9.00
 -10  10  -3   27.20   10.00
  10  10   3   43.40   10.00
  12 -10   3   24.20    6.70
 -12 -10  -3   27.00    6.90
  12 -10   3   17.00    6.70
 -12 -10  -3   19.20    5.20
  12 -10   3   17.30    3.30
 -12 -10  -3   23.50    4.30
  12  10   3   15.60    5.80
 -12  10  -3    4.90    7.30
  14 -10   3   25.20    8.00
  14 -10   3   22.00    3.20
 -14 -10  -3   26.30    6.60
 -14 -10  -3   23.20    6.60
  14 -10   3   27.70    8.40
 -14 -10  -3   18.80    4.20
  14  10   3   16.80    6.10
 -14  10  -3   27.50   11.30
 -13 -11   3  228.18   12.60
 -13 -11   3  270.47   15.90
 -13 -11   3  274.27   17.70
  13 -11  -3  276.07   12.90
 -13  11   3  288.37   24.70
 -11 -11   3  609.24   28.00
 -11 -11   3  588.24   22.00
 -11 -11   3  600.64   25.50
 -11  11   3  569.54   35.50
  -9 -11   3  124.19    7.90
  -9 -11   3  100.29    9.50
   9 -11  -3  106.09    8.10
  -9 -11   3  130.19   11.90
  -9 -11   3  127.09   13.20
  -9  11   3   97.19   18.00
  -9  11   3  109.99    5.60
   9  11  -3  105.39   19.10
  -7 -11   3  211.98   15.10
   7 -11  -3  214.38   12.00
  -7 -11   3  231.48   17.80
  -7 -11   3  207.78   13.20
  -7 -11   3  220.98   10.80
   7  11  -3  235.38   24.40
  -7  11   3  240.98   22.70
  -5 -11   3  121.89   13.10
  -5 -11   3  162.68   12.90
  -5 -11   3  155.98   11.00
   5 -11  -3  151.18   10.00
  -5 -11   3  142.59    8.20
  -5  11   3  135.29   22.00
   5  11  -3  192.88   22.10
  -3 -11   3  442.06   24.90
  -3 -11   3  495.95   20.50
   3 -11  -3  493.15   20.20
  -3 -11   3  440.76   16.60
   3 -11  -3  481.85   18.20
  -3 -11   3  449.16   23.00
   3  11  -3  417.06   32.10
  -3  11   3  410.26   30.60
  -1 -11   3  147.69   14.20
   1 -11  -3  148.69    9.60
  -1 -11   3  180.38   13.70
   1 -11  -3  171.78   11.30
  -1 -11   3  178.58   16.30
   1  11  -3  216.58   37.10
  -1  11   3  182.78   20.70
   1 -11   3  254.07   13.40
  -1 -11  -3  271.17   13.60
  -1 -11  -3  297.87   15.10
   1 -11   3  245.08   18.20
   1 -11   3  248.48   18.90
   1  11   3  246.18   24.70
  -1  11  -3  229.78   24.70
   3 -11   3   17.30    4.30
   3 -11   3    8.00    5.60
  -3 -11  -3   14.40    4.70
  -3 -11  -3   15.10    4.90
   3  11   3    6.30    8.50
  -3  11  -3   18.60    9.80
  -5 -11  -3  126.89   10.60
  -5 -11  -3  143.39   10.40
   5 -11   3  135.89    8.90
   5 -11   3  132.79   13.70
  -5 -11  -3  135.39    6.30
  -5  11  -3  131.79   22.90
   7 -11   3   60.69    6.00
  -7 -11  -3   67.19    4.80
  -7 -11  -3   46.50    7.90
  -7 -11  -3   71.39    9.80
   7 -11   3   50.79   10.80
   7 -11   3   45.70   10.00
  -7  11  -3   40.10   13.80
   7  11   3   67.69   11.80
   9 -11   3  161.58   13.70
  -9 -11  -3  191.28   20.60
   9 -11   3  188.78   15.90
  -9 -11  -3  163.98   11.90
  -9 -11  -3  172.78    8.60
   9 -11   3  185.48    9.70
   9  11   3  165.08   14.20
  -9  11  -3  155.58   20.10
  11 -11   3   30.20    8.60
  11 -11   3   25.50    6.80
  11 -11   3   35.30    4.70
 -11 -11  -3   34.60    6.80
 -11 -11  -3   29.00    7.30
 -11 -11  -3   29.60    4.40
 -11  11  -3   35.20   13.60
  11  11   3   24.70    7.00
 -10 -12   3   77.69    6.80
 -10 -12   3   80.79   12.60
 -10 -12   3   51.29    7.90
  10 -12  -3   76.29    6.70
 -10  12   3   60.59   14.60
  -8 -12   3   62.19   10.50
  -8 -12   3   71.29   10.20
  -8 -12   3   60.19    6.00
   8 -12  -3   71.99    7.10
  -8  12   3   61.19   14.60
   8  12  -3   61.69   17.00
  -6 -12   3  169.68   16.40
   6 -12  -3  164.38   11.10
  -6 -12   3  184.88   12.50
  -6 -12   3  191.58   14.70
   6  12  -3  202.48   23.80
  -6  12   3  151.58   19.80
  -4 -12   3  224.18   10.50
  -4 -12   3  202.78   13.10
  -4 -12   3  219.68   15.80
  -4 -12   3  185.78   17.20
   4 -12  -3  226.98   13.10
  -4  12   3  176.18   21.10
   2 -12  -3  144.09    9.60
  -2 -12   3  133.89    7.80
  -2 -12   3  142.29   10.60
   2 -12  -3  144.99   10.80
  -2 -12   3  153.28   15.10
   2  12  -3  147.09   27.40
  -2  12   3   95.79   20.40
   0 -12  -3   54.19    7.20
   0 -12   3   34.20    9.70
   0 -12  -3   58.89    8.80
   0 -12   3   46.60    7.50
   0 -12   3   40.80    8.80
   0  12   3   44.30   14.80
   0  12  -3   39.70   15.30
   2 -12   3   64.29   12.20
   2 -12   3   38.20    7.90
  -2 -12  -3   67.39    8.20
   2 -12   3   65.89    7.10
  -2 -12  -3   60.19    8.40
   2  12   3   48.70   15.00
  -2  12  -3   59.39   16.60
  -4 -12  -3  128.99   10.80
  -4 -12  -3  101.49    9.10
   4 -12   3  102.39    9.40
  -4 -12  -3  116.29    5.50
   4 -12   3  109.49   13.50
   4 -12   3   94.09   10.90
  -4  12  -3  115.89   24.00
   6 -12   3  155.08   16.00
   6 -12   3  182.68   10.60
  -6 -12  -3  184.38    8.00
  -6 -12  -3  182.18   13.20
  -6 -12  -3  183.28   12.30
   6 -12   3  163.18   14.00
  -6  12  -3  197.08   23.40
  -8 -12  -3   86.99    5.80
  -8 -12  -3   96.19    9.50
   8 -12   3   64.89   11.50
  -8 -12  -3  100.49   10.30
   8 -12   3   86.29   10.60
   8 -12   3   87.09    7.20
   8  12   3   75.89   12.40
  -8  12  -3   58.79   15.50
  -3 -13   3    5.00    4.00
   3 -13  -3   -4.30    3.10
  -3 -13   3   -2.40    5.30
  -3 -13   3   14.90    7.00
  -3 -13   3    5.50    3.20
  -3  13   3    2.20    7.00
   3  13  -3    0.90    7.60
  -1 -13   3    0.00    4.20
  -1 -13   3   -0.60    2.20
   1 -13  -3    1.80    3.10
  -1 -13   3    5.10    3.90
  -1 -13   3   -0.50    4.70
   1 -13  -3    7.50    4.50
  -1  13   3    5.60    8.50
   1  13  -3    3.50   10.30
   1 -13   3   -0.10    3.80
  -1 -13  -3   -3.10    2.60
  -1 -13  -3    5.10    4.30
   1 -13   3   -0.80    5.20
   1 -13   3    1.80    3.50
   1  13   3   10.80   10.80
  -1  13  -3    4.80    9.40
   3 -13   3   38.20   10.20
   3 -13   3   49.80    7.30
  -3 -13  -3   47.70    7.90
   3 -13   3   54.79    9.40
  -3 -13  -3   47.40    8.30
  -3  13  -3   36.40   13.80
 -24   0   4   46.60    8.60
 -24   0   4   37.60    5.80
 -22   0   4   14.00    4.70
 -22   0   4   14.40    2.90
 -22   0   4   23.30    4.00
 -22   0   4   13.60    3.50
 -20   0   4  302.47   13.90
 -20   0   4  378.16   13.50
 -20   0   4  370.16   15.00
 -20   0   4  392.76   17.00
 -18   0   4  498.35   16.70
 -18   0   4  477.45   18.90
 -18   0   4  503.05   16.70
 -18   0   4  476.45   17.70
 -16   0   4   33.60    3.40
 -16   0   4   31.90    3.20
 -16   0   4   37.60    4.00
 -16   0   4   34.90    5.10
 -14   0   4  504.05   17.40
 -14   0   4  501.55   16.80
 -14   0   4  530.45   16.60
 -14   0   4  524.95   17.60
 -12   0   4  793.22   24.00
 -12   0   4  832.02   24.30
 -12   0   4  799.12   23.60
 -12   0   4  799.62   24.50
 -10   0   4 1695.83   46.20
 -10   0   4 1665.63   46.00
 -10   0   4 1623.84   46.00
  -8   0   4 2146.59   59.59
  -8   0   4 2188.68   58.79
  -6   0   4 1374.16   41.10
  -4   0   4 1172.08   35.50
  -4   0   4 1212.28   34.70
  -2   0   4 7896.91  200.78
  -2   0   4 7718.93  202.08
  -2   0   4 7520.95  203.18
   0   0  -4 3316.57   92.29
   0   0   4 3434.16   91.39
   0   0  -4 3511.05   91.89
   0   0   4 3396.76   92.59
   2   0   4 2383.16   63.49
   2   0   4 2387.06   66.69
   2   0   4 2388.26   65.69
  -2   0  -4 2431.06   66.49
   2   0   4 2378.36   67.59
  -2   0  -4 2329.47   66.39
   4   0   4  893.31   29.60
   4   0   4  941.51   26.60
   4   0   4  924.11   28.80
  -4   0  -4  981.40   30.30
   4   0   4  903.71   30.20
  -4   0  -4  939.21   29.50
  -6   0  -4 1212.98   38.10
  -6   0  -4 1229.68   37.10
   6   0   4 1186.68   37.30
   6   0   4 1157.28   33.60
   6   0   4 1194.98   36.30
   6   0   4 1206.98   37.60
  -6   0  -4 1175.58   34.10
   8   0   4  960.50   31.00
  -8   0  -4 1156.18   36.90
  -8   0  -4 1125.99   32.30
  -8   0  -4 1017.50   34.50
   8   0   4 1146.59   35.70
   8   0   4 1118.79   35.40
   8   0   4 1147.99   36.20
 -10   0  -4 1550.94   49.20
  10   0   4 1576.54   47.00
  10   0   4 1398.36   43.20
  10   0   4 1575.24   47.70
 -10   0  -4 1527.35   43.80
 -12   0  -4   90.29    6.00
 -12   0  -4   98.79    9.00
  12   0   4   89.79    7.50
  12   0   4   72.79    7.40
 -14   0  -4  221.68   14.70
  14   0   4  228.08   13.10
  14   0   4  204.08   11.70
 -14   0  -4  218.48   10.50
  16   0   4   78.29    8.40
 -16   0  -4   75.69    6.30
  16   0   4   80.59    7.50
 -16   0  -4   84.49    9.70
  18   0   4  394.86   28.30
 -18   0  -4  404.76   16.90
 -18   0  -4  411.06   25.40
  18   0   4  416.86   18.10
 -20   0  -4  177.28   15.40
 -20   0  -4  155.38   10.00
  20   0   4  168.28   10.60
  20   0   4  174.38   12.90
 -22   0  -4  151.68   15.10
 -22   0  -4  168.58   10.70
  22   0   4  159.18   13.10
  22   0   4  170.98   10.40
 -23  -1   4   63.99    6.50
 -23  -1   4   71.09    5.70
 -23  -1   4   72.69    8.00
 -23   1   4   62.19    7.70
 -23   1   4   77.49    6.50
 -21  -1   4    2.20    2.30
 -21  -1   4    0.60    2.40
 -21  -1   4    0.20    2.20
 -21   1   4   -0.10    2.90
 -21   1   4    3.10    2.60
 -19  -1   4  252.37   13.10
 -19  -1   4  273.17   12.30
 -19  -1   4  266.37   11.30
 -19   1   4  263.57   11.60
 -19   1   4  256.17   11.30
 -19   1   4  273.07   10.00
 -19   1   4  264.77   13.50
 -17  -1   4  385.46   15.20
 -17  -1   4  399.86   16.10
 -17  -1   4  400.46   14.70
 -17   1   4  380.66   14.50
 -17   1   4  407.96   13.40
 -17   1   4  380.86   15.80
 -15  -1   4  298.57   12.50
 -15  -1   4  291.67   12.10
 -15  -1   4  300.97   11.80
 -15   1   4  287.07   12.00
 -15   1   4  304.27   10.70
 -15   1   4  296.97   11.60
 -15   1   4  299.47   11.50
 -13  -1   4   89.39    5.60
 -13  -1   4   96.69    5.70
 -13  -1   4   97.09    5.70
 -13   1   4   98.39    5.50
 -13   1   4   99.89    5.60
 -13   1   4   94.59    5.40
 -13   1   4   95.49    4.90
 -11  -1   4  474.25   15.90
 -11  -1   4  456.75   15.80
 -11  -1   4  490.65   20.00
 -11  -1   4  460.85   15.50
 -11   1   4  486.25   15.40
 -11   1   4  479.05   15.00
  -9  -1   4  850.81   25.80
  -9  -1   4  874.41   26.00
  -9  -1   4  874.81   29.20
  -9  -1   4  859.81   25.20
  -9   1   4  850.61   25.00
  -9   1   4  884.41   25.00
  -7  -1   4 2383.66   66.99
  -7  -1   4 2357.56   64.49
  -7  -1   4 2338.07   65.29
  -7  -1   4 2409.66   63.59
  -5  -1   4  640.24   19.10
  -5  -1   4  621.94   20.90
  -5  -1   4  634.04   20.90
  -3  -1   4  476.95   16.10
  -3  -1   4  468.05   16.90
  -3  -1   4  468.75   15.30
  -3   1   4  475.05   18.50
   3   1  -4  452.45   15.30
  -1  -1   4 1620.64   46.10
  -1  -1   4 1622.44   47.70
  -1  -1   4 1669.73   46.60
  -1   1   4 1611.54   44.70
  -1   1   4 1657.33   47.60
   1   1  -4 1669.83   47.40
   1   1  -4 1620.74   46.10
  -1  -1  -4 2977.50   79.19
   1  -1   4 2876.11   81.09
   1  -1   4 2959.60   80.19
   1  -1   4 2887.31   79.79
  -1  -1  -4 2841.22   80.59
   1   1   4 2885.31   77.19
  -1   1  -4 2912.01   79.69
  -1   1  -4 2987.90   81.09
   1   1   4 3006.40   81.19
  -3  -1  -4 1066.69   32.00
   3  -1   4 1046.90   33.10
   3  -1   4 1045.20   32.20
   3  -1   4 1025.20   29.40
  -3  -1  -4 1001.70   32.50
   3  -1   4 1073.19   32.30
   3   1   4 1023.90   29.20
  -3   1  -4 1024.70   31.80
  -3   1  -4 1071.89   33.40
   3   1   4 1078.29   33.20
   3   1   4 1042.60   31.00
   5  -1   4  747.83   24.80
   5  -1   4  756.62   25.40
   5  -1   4  720.73   24.30
  -5  -1  -4  710.53   21.90
  -5  -1  -4  749.13   26.60
  -5   1  -4  737.03   26.00
   5   1   4  719.53   21.50
  -5   1  -4  718.93   25.70
   5   1   4  723.23   23.50
   5   1   4  718.93   25.10
   7  -1   4  214.88   11.20
  -7  -1  -4  212.58    8.70
   7  -1   4  204.58    8.10
   7  -1   4  239.48   11.40
  -7  -1  -4  186.18   10.30
   7  -1   4  202.48   10.20
  -7  -1  -4  200.88   10.90
   7   1   4  208.48    8.10
  -7   1  -4  205.78   10.40
  -7   1  -4  197.98   11.50
   7   1   4  214.58   11.20
   7   1   4  215.78    9.90
  -7   1  -4  217.18    8.80
   9  -1   4  790.42   27.70
  -9  -1  -4  760.92   28.20
   9  -1   4  832.22   27.70
   9  -1   4  735.83   26.30
   9   1   4  724.13   24.20
  -9   1  -4  800.52   24.50
   9   1   4  808.82   28.00
   9   1   4  789.82   26.20
  -9   1  -4  830.82   29.80
 -11  -1  -4  628.24   25.60
  11  -1   4  659.33   24.20
 -11  -1  -4  657.63   21.60
  11  -1   4  659.13   24.80
  11   1   4  677.93   24.50
  11   1   4  630.74   24.60
 -11   1  -4  628.74   21.40
 -11   1  -4  677.73   27.10
  13  -1   4  140.99   10.20
  13  -1   4  155.58    9.90
 -13  -1  -4  129.09   10.50
 -13  -1  -4  131.89    7.80
 -13   1  -4  138.29    7.80
  13   1   4  132.89    9.80
 -13   1  -4  139.99   11.50
  13   1   4  138.69    9.40
 -15  -1  -4   23.80    4.20
  15  -1   4   28.50    6.40
  15  -1   4   29.20    5.70
 -15  -1  -4   16.60    5.00
 -15   1  -4   20.00    6.00
  15   1   4   25.70    6.00
  15   1   4   35.20    6.40
 -15   1  -4   26.90    4.60
  17  -1   4  251.87   13.00
 -17  -1  -4  179.78   11.90
  17  -1   4  210.88   13.80
 -17  -1  -4  215.18   15.40
 -17   1  -4  215.18   16.00
  17   1   4  228.18   12.40
  17   1   4  212.68   13.50
  19  -1   4  140.29    9.70
  19  -1   4  145.59   11.80
 -19  -1  -4  141.39    9.40
 -19  -1  -4  173.88   14.40
 -19   1  -4  160.78   14.30
 -19   1  -4  139.69    9.10
  19   1   4  146.99    9.80
  19   1   4  148.19   11.70
  21  -1   4  173.58   10.90
 -21  -1  -4  187.38   16.00
 -21  -1  -4  184.48   11.10
  21  -1   4  176.88   13.40
 -21   1  -4  160.08   15.40
  21   1   4  166.98   12.90
 -21   1  -4  167.68   10.50
  21   1   4  187.48   11.20
 -24  -2   4    6.60    2.50
 -24  -2   4    7.00    3.30
 -24  -2   4    2.30    3.40
 -24   2   4    4.50    2.70
 -24   2   4    4.80    4.20
 -22  -2   4   62.19    6.30
 -22  -2   4   62.89    5.90
 -22  -2   4   84.99   14.60
 -22  -2   4   56.69    7.20
 -22   2   4   56.59    7.40
 -22   2   4   61.59    5.70
 -20  -2   4    6.30    2.60
 -20  -2   4   17.20    6.90
 -20  -2   4    8.70    2.90
 -20  -2   4    2.50    5.30
 -20   2   4    4.10    3.20
 -20   2   4    1.90    2.10
 -18  -2   4   40.30    6.30
 -18  -2   4   43.90    9.50
 -18  -2   4   30.70    4.30
 -18  -2   4   54.09    6.50
 -18   2   4   32.60    3.90
 -18   2   4   35.70    5.90
 -16  -2   4  201.08   14.90
 -16  -2   4  191.98   10.10
 -16  -2   4  200.68    9.60
 -16  -2   4  189.28    9.60
 -16   2   4  193.38    9.30
 -16   2   4  197.68    8.70
 -16   2   4  184.38    9.90
 -14  -2   4    7.70    4.80
 -14  -2   4    3.30    2.20
 -14  -2   4    4.50    2.30
 -14  -2   4    6.10    2.50
 -14   2   4    3.20    2.00
 -14   2   4    4.60    2.00
  14   2  -4    6.70    1.80
 -14   2   4    4.20    2.20
 -12  -2   4    4.90    3.30
 -12  -2   4    4.00    2.00
 -12  -2   4   -0.20    1.40
 -12  -2   4   -0.90    1.40
 -12   2   4    4.00    1.30
 -12   2   4    4.00    1.50
  12   2  -4    2.40    1.30
 -12   2   4    3.60    1.70
 -10  -2   4   26.40    3.80
 -10  -2   4   20.70    3.50
 -10  -2   4   18.70    2.70
 -10  -2   4   30.80    6.30
 -10  -2   4   22.60    3.20
  10   2  -4   18.90    2.00
 -10   2   4   17.60    2.00
 -10   2   4   20.30    2.20
  -8  -2   4   21.40    4.90
  -8  -2   4   10.80    2.30
  -8  -2   4   14.80    2.80
  -6  -2   4   86.49    6.90
  -6  -2   4   84.89    4.90
  -6  -2   4   75.29    5.40
  -6  -2   4   82.79    5.00
   6   2  -4   82.69    5.30
  -4  -2   4   23.50    4.40
  -4  -2   4   25.00    3.60
  -4  -2   4   20.80    3.70
  -4  -2   4   17.80    2.10
  -4  -2   4   20.80    3.20
   4   2  -4   18.30    2.20
   4   2  -4   26.50    4.80
   4   2  -4   15.80    2.80
  -2  -2   4  679.73   22.70
  -2  -2   4  658.03   20.20
  -2  -2   4  652.13   22.50
  -2   2   4  653.73   19.10
   2   2  -4  687.93   23.90
   2   2  -4  676.73   20.40
   2   2  -4  624.64   21.60
   0  -2  -4   34.00    2.80
   0  -2   4   28.50    3.70
   0  -2   4   29.80    3.70
   0  -2   4   31.00    5.00
   0  -2  -4   31.60    4.10
   0   2   4   35.80    5.00
   0   2  -4   37.00    3.30
   0   2   4   32.00    2.20
   0   2   4   29.40    2.60
   0   2  -4   40.80    5.90
   0   2  -4   33.10    3.50
  -2  -2  -4   99.29    5.80
   2  -2   4  112.59    7.00
   2  -2   4  108.99    6.50
   2  -2   4  100.49    7.20
   2   2   4  101.49    7.30
  -2   2  -4  106.99    6.10
   2   2   4  114.49    5.70
   2   2   4  101.89    4.50
  -2   2  -4  102.09    7.60
  -2   2  -4  110.09    6.70
   4  -2   4  119.39    7.90
   4  -2   4  125.89    7.40
  -4  -2  -4  119.59    7.00
  -4  -2  -4  114.59    5.40
   4  -2   4  112.59    7.20
  -4   2  -4  118.99    6.90
   4   2   4  112.49    5.00
  -4   2  -4  115.79    7.10
  -4   2  -4  107.99    8.20
   4   2   4  113.09    7.90
   4   2   4  112.49    6.30
   6  -2   4    2.60    2.20
   6  -2   4    4.30    2.90
  -6  -2  -4    6.60    2.60
  -6  -2  -4    7.20    2.70
   6  -2   4    2.90    1.00
  -6  -2  -4    1.10    1.20
   6  -2   4    5.80    2.70
   6   2   4    3.70    1.20
   6   2   4    0.80    2.30
   6   2   4    7.80    2.00
  -6   2  -4    2.00    2.50
   6   2   4    5.00    2.00
  -6   2  -4    2.50    1.90
  -8  -2  -4   25.20    4.60
   8  -2   4   22.40    4.80
  -8  -2  -4   26.90    3.70
   8  -2   4   13.00    3.90
   8  -2   4   33.00    5.40
  -8  -2  -4   22.80    4.60
   8   2   4   15.30    2.80
   8   2   4   21.10    4.90
   8   2   4   18.10    2.20
   8   2   4   19.20    3.50
  -8   2  -4   21.60    3.00
  -8   2  -4   29.80    5.90
 -10  -2  -4    7.10    2.90
  10  -2   4    7.00    3.20
 -10  -2  -4    6.40    2.10
  10  -2   4    6.30    3.40
 -10   2  -4   10.00    4.50
  10   2   4    5.70    3.50
 -10   2  -4    3.70    1.80
  12  -2   4  428.86   18.80
  12  -2   4  435.96   18.30
 -12  -2  -4  417.06   15.60
 -12  -2  -4  400.26   19.20
  12   2   4  411.56   18.50
 -12   2  -4  406.16   15.40
 -12   2  -4  390.96   20.40
  14  -2   4   48.70    7.00
 -14  -2  -4   39.80    4.50
 -14  -2  -4   55.09    9.40
  14  -2   4   40.90    7.00
 -14   2  -4   31.90    7.00
  14   2   4   44.80    7.30
  14   2   4   59.79    8.20
 -14   2  -4   42.60    4.60
  16  -2   4   12.50    5.00
 -16  -2  -4   11.60    3.10
 -16  -2  -4    8.50    4.30
  16  -2   4   17.30    4.60
 -16   2  -4   12.10    3.10
 -16   2  -4   13.00    5.30
  16   2   4   17.20    4.70
  16   2   4   11.40    4.50
 -18  -2  -4   -0.70    2.10
  18  -2   4    2.20    3.70
 -18  -2  -4    0.50    2.60
  18  -2   4    1.90    3.30
 -18   2  -4    0.70    1.90
 -18   2  -4    0.40    4.00
  18   2   4    2.20    2.90
  18   2   4    3.50    3.80
  20  -2   4   60.69    9.70
 -20  -2  -4   43.20    8.70
 -20  -2  -4   51.09    6.00
  20  -2   4   50.39    6.30
 -20   2  -4   63.09   11.20
 -20   2  -4   38.80    5.60
  20   2   4   53.79    8.90
  20   2   4   52.79    6.40
  22  -2   4   86.69    7.90
 -22  -2  -4   76.89    7.60
  22  -2   4   86.39   10.10
 -22  -2  -4   84.99   11.30
  22   2   4   94.49    7.90
 -22   2  -4   70.49    7.20
  22   2   4   90.89    9.70
 -22   2  -4   82.29   15.00
 -23  -3   4  260.47   15.20
 -23  -3   4  265.37   12.90
 -23  -3   4  265.37   13.50
 -23   3   4  242.38   15.50
 -21  -3   4  185.78   17.00
 -21  -3   4  200.18   10.80
 -21  -3   4  179.98   10.60
 -21  -3   4  197.38   12.20
 -21   3   4  191.28    9.40
 -19  -3   4    9.80    4.20
 -19  -3   4    4.70    3.30
 -19  -3   4    3.90    2.70
 -19  -3   4   12.00    6.70
 -19   3   4    2.90    2.80
 -19   3   4    4.10    2.00
 -17  -3   4   23.10    7.40
 -17  -3   4   20.80    4.50
 -17  -3   4   21.30    4.80
 -17  -3   4   26.50    4.50
 -17   3   4   23.90    5.00
 -17   3   4   25.90    3.60
 -15  -3   4  437.66   16.40
 -15  -3   4  396.16   16.50
 -15  -3   4  412.36   15.90
 -15  -3   4  409.76   22.30
 -15   3   4  415.56   14.10
 -15   3   4  410.16   16.40
 -13  -3   4  333.57   18.90
 -13  -3   4  342.27   12.30
 -13  -3   4  308.87   12.90
 -13  -3   4  347.47   13.70
 -13  -3   4  325.57   13.80
 -13   3   4  333.57   12.60
  13   3  -4  316.07   13.20
 -13   3   4  332.47   13.30
 -13   3   4  349.47   11.50
 -13   3   4  304.67   13.20
 -11  -3   4  161.08   11.80
 -11  -3   4  143.99    7.40
 -11  -3   4  141.79    7.90
 -11  -3   4  138.89    7.80
 -11  -3   4  158.78    7.90
 -11   3   4  158.38    5.60
  11   3  -4  128.19    6.60
  11   3  -4  136.99    6.90
 -11   3   4  151.08    6.10
  -9  -3   4  196.48    9.20
  -9  -3   4  165.38   11.70
  -9  -3   4  185.08    8.80
  -9  -3   4  194.38    9.10
   9   3  -4  193.78    8.50
  -9   3   4  185.48    7.60
  -7  -3   4 1543.05   44.40
  -7  -3   4 1515.45   49.30
  -7  -3   4 1578.04   45.00
  -7  -3   4 1607.04   45.50
   7   3  -4 1537.15   43.20
   7   3  -4 1527.15   44.60
  -5  -3   4 2229.68   61.39
  -5  -3   4 2214.88   60.79
  -5  -3   4 2193.88   65.19
  -5  -3   4 2162.18   62.09
   5   3  -4 2179.28   65.59
   5   3  -4 2189.28   61.59
  -3  -3   4 1664.63   46.00
  -3  -3   4 1725.83   48.40
  -3  -3   4 1661.03   49.30
  -3  -3   4 1663.33   50.59
  -3   3   4 1666.83   45.50
  -3   3   4 1712.83   44.50
   3   3  -4 1672.33   48.60
   3   3  -4 1674.53   46.10
   3   3  -4 1667.93   52.49
  -1  -3   4  289.67   12.80
  -1  -3   4  281.97   11.70
  -1  -3   4  282.97   11.50
  -1  -3   4  289.57   13.10
   1  -3  -4  273.47    9.60
   1  -3  -4  251.57   11.60
  -1   3   4  275.77    9.90
   1   3  -4  298.57   14.90
  -1   3   4  281.87    8.80
   1   3  -4  274.37   10.40
   1   3  -4  276.57   11.90
  -1  -3  -4  119.39    6.00
   1  -3   4  105.09    6.30
   1  -3   4  124.99    7.80
   1  -3   4  113.89    7.70
  -1  -3  -4  110.89    8.10
  -1   3  -4  128.79    7.50
  -1   3  -4  118.69    8.90
   1   3   4  113.99    8.10
  -1   3  -4  108.89    6.10
   1   3   4  119.39    5.90
   1   3   4  115.09    4.70
   1   3   4  114.79    5.80
   3  -3   4  273.87   11.90
  -3  -3  -4  291.47   11.50
  -3  -3  -4  279.67    9.60
   3  -3   4  280.67   13.00
   3  -3   4  279.17   13.20
   3  -3   4  258.77   10.30
  -3   3  -4  279.77   11.50
  -3   3  -4  286.27   14.70
   3   3   4  257.57   10.70
   3   3   4  275.57    9.30
  -3   3  -4  280.07   12.20
   3   3   4  283.17   13.50
   3   3   4  282.37   10.70
  -5  -3  -4 3003.90   82.69
   5  -3   4 3056.19   84.49
   5  -3   4 2960.10   83.99
   5  -3   4 2994.40   82.99
   5  -3   4 2928.51   79.29
  -5  -3  -4 3049.79   79.49
  -5   3  -4 2891.81   82.69
   5   3   4 2776.02   80.29
  -5   3  -4 3134.69   87.19
   5   3   4 2930.91   78.89
   5   3   4 3054.59   84.89
  -5   3  -4 2850.71   81.89
   5   3   4 3005.70   81.49
  -7  -3  -4  176.08    7.80
   7  -3   4  171.38    7.40
   7  -3   4  184.68   10.40
  -7  -3  -4  180.98   10.00
   7  -3   4  190.98   10.50
   7  -3   4  181.78   10.60
   7   3   4  188.48   11.10
  -7   3  -4  198.98   12.60
   7   3   4  173.78    7.30
  -7   3  -4  173.08    9.50
   7   3   4  178.38    9.10
   9  -3   4   15.30    4.30
  -9  -3  -4   11.30    3.30
  -9  -3  -4    7.90    2.00
   9  -3   4   12.20    4.40
  -9   3  -4   10.10    4.80
   9   3   4    9.80    2.90
  -9   3  -4   10.20    3.20
   9   3   4   10.70    3.40
  11  -3   4    7.40    3.70
 -11  -3  -4    5.40    2.20
  11  -3   4    5.60    3.20
 -11  -3  -4    5.30    3.50
  11   3   4    2.60    2.90
 -11   3  -4    4.10    3.40
 -11   3  -4    8.10    2.50
  13  -3   4   10.70    3.90
 -13  -3  -4    6.90    2.30
  13  -3   4    6.80    3.60
 -13  -3  -4   10.30    4.50
 -13   3  -4    8.00    2.50
  13   3   4   15.10    4.90
 -13   3  -4    9.40    5.50
  15  -3   4   77.89    8.40
  15  -3   4   88.99    7.90
 -15  -3  -4   84.09    9.00
 -15  -3  -4   81.99    6.40
 -15   3  -4   79.29   10.10
 -15   3  -4   84.89    6.40
  15   3   4   71.89    8.00
 -17  -3  -4  260.37   12.60
 -17  -3  -4  269.27   17.00
  17  -3   4  253.27   15.60
  17  -3   4  246.08   13.80
 -17   3  -4  233.38   17.90
  17   3   4  258.27   14.10
  17   3   4  252.57   15.00
  19  -3   4  102.49    8.60
 -19  -3  -4   90.59   10.80
 -19  -3  -4   86.39    7.30
  19  -3   4   84.99    9.60
  19   3   4   90.99    9.40
 -19   3  -4   75.49   12.60
  19   3   4   91.49    8.30
 -19   3  -4   83.69    7.10
  21  -3   4    2.40    3.50
  21  -3   4    0.00    3.80
 -21  -3  -4   -1.10    2.30
 -21  -3  -4    4.00    4.90
  21   3   4   -4.50    2.90
 -21   3  -4   -1.50    4.20
  21   3   4    4.10    3.40
 -21   3  -4    0.40    2.30
 -22  -4   4  303.07   14.50
 -22  -4   4  272.27   15.60
 -22   4   4  265.87   16.20
 -22   4   4  263.27   11.50
 -20  -4   4    5.70    2.90
 -20  -4   4    3.00    2.30
 -20  -4   4    3.50    3.30
 -20  -4   4   -4.70    6.60
 -20   4   4    3.40    2.00
 -20   4   4    0.10    3.30
 -18  -4   4   42.50   11.30
 -18  -4   4   49.00    6.30
 -18  -4   4   57.39    8.70
 -18  -4   4   47.20    5.40
 -18   4   4   43.60    3.90
 -18   4   4   33.60    6.60
 -16  -4   4  402.76   23.20
 -16  -4   4  364.66   15.30
 -16  -4   4  385.96   16.00
 -16  -4   4  357.26   16.40
 -16   4   4  378.26   12.90
 -16   4   4  359.56   16.50
 -14  -4   4  897.41   37.30
 -14  -4   4  878.01   29.40
 -14  -4   4  873.31   28.60
 -14  -4   4  861.91   30.10
 -14  -4   4  914.41   28.10
 -14   4   4  911.71   30.20
 -14   4   4  907.71   28.10
  14   4  -4  892.41   27.00
 -14   4   4  925.61   26.00
 -12  -4   4  850.41   28.90
 -12  -4   4  850.11   27.40
 -12  -4   4  855.61   35.20
 -12  -4   4  878.71   28.40
 -12  -4   4  926.01   28.00
 -12   4   4  872.11   24.60
  12   4  -4  877.21   26.80
 -12   4   4  819.42   27.60
 -12   4   4  868.71   28.50
 -10  -4   4  166.78    8.10
 -10  -4   4  162.88    8.70
 -10  -4   4  181.78    9.20
 -10  -4   4  168.88    9.20
 -10  -4   4  140.79   12.00
 -10   4   4  157.88    9.10
 -10   4   4  166.58    5.90
 -10   4   4  162.38    8.80
  10   4  -4  157.68    7.90
  10   4  -4  149.69    8.50
  -8  -4   4   34.90    4.30
  -8  -4   4   38.00    4.10
  -8  -4   4   45.30    4.80
  -8  -4   4   47.20    7.90
   8   4  -4   39.80    3.90
   8   4  -4   38.40    3.70
  -8   4   4   37.90    2.90
  -8   4   4   40.10    2.70
  -8   4   4   43.40    4.90
  -6  -4   4 2210.68   62.79
  -6  -4   4 2296.57   67.79
  -6  -4   4 2210.88   62.39
  -6  -4   4 2155.48   61.09
  -6   4   4 2245.08   59.09
  -6   4   4 2131.39   58.79
   6   4  -4 2192.88   68.19
   6   4  -4 2165.48   61.69
   6   4  -4 2115.79   60.29
  -6   4   4 2130.89   63.09
  -4  -4   4 3350.66   91.19
  -4  -4   4 3296.07   93.29
  -4  -4   4 3282.87   96.49
  -4  -4   4 3462.15   89.29
  -4  -4   4 3444.36   92.89
   4   4  -4 3261.17   88.89
   4   4  -4 3548.84   99.49
  -4   4   4 3344.07   89.49
  -4   4   4 3330.57   89.49
   4   4  -4 3261.47   93.39
  -4   4   4 3478.25   95.29
   2  -4  -4 1989.10   57.59
  -2  -4   4 2058.39   58.79
  -2  -4   4 2052.49   56.09
  -2  -4   4 2075.89   56.99
  -2  -4   4 2039.90   59.69
  -2  -4   4 2022.30   61.09
  -2   4   4 2114.89   62.79
   2   4  -4 1974.00   55.69
   2   4  -4 1970.70   63.89
  -2   4   4 2042.80   55.89
  -2   4   4 2081.89   53.59
  -2   4   4 2025.80   55.69
   2   4  -4 2041.70   60.09
   0  -4   4  330.57   14.90
   0  -4  -4  339.27   12.10
   0  -4   4  339.97   12.90
   0  -4  -4  340.57   15.30
   0  -4   4  343.17   14.40
   0  -4   4  338.17   15.40
   0  -4   4  364.56   12.90
   0   4   4  326.87   12.00
   0   4  -4  335.27   14.00
   0   4  -4  331.27   18.10
   0   4   4  348.87   12.50
   0   4   4  325.07   10.30
   0   4  -4  331.17   12.40
   2  -4   4  147.19    9.20
   2  -4   4  153.68    8.60
  -2  -4  -4  148.09    5.80
  -2  -4  -4  132.79    7.10
   2  -4   4  137.29    9.00
  -2  -4  -4  138.49   11.30
   2  -4   4  128.09    7.60
   2   4   4  140.09    9.70
   2   4   4  145.39    5.50
  -2   4  -4  144.39   10.90
   2   4   4  135.09    6.70
   2   4   4  135.49    7.00
  -2   4  -4  141.49    7.30
  -2   4  -4  134.89    8.10
   4  -4   4 1400.46   41.30
  -4  -4  -4 1212.68   45.60
   4  -4   4 1441.76   43.40
  -4  -4  -4 1394.36   37.70
   4  -4   4 1350.56   37.80
   4   4   4 1410.06   43.80
  -4   4  -4 1370.26   40.30
   4   4   4 1360.46   39.90
  -4   4  -4 1388.16   46.30
   4   4   4 1233.68   38.80
   4   4   4 1380.06   37.30
  -4   4  -4 1264.27   41.20
  -6  -4  -4 3297.97   83.69
   6  -4   4 2773.22   82.89
   6  -4   4 3239.98   89.29
   6  -4   4 3019.70   87.39
   6  -4   4 2946.11   88.29
  -6  -4  -4 3270.87   87.29
   6   4   4 3076.59   82.89
   6   4   4 3107.59   85.99
   6   4   4 3240.08   89.79
  -6   4  -4 3192.48   92.89
  -8  -4  -4  376.46   16.40
  -8  -4  -4  378.46   13.50
   8  -4   4  374.96   16.80
   8  -4   4  395.26   17.50
   8   4   4  340.07   14.90
  -8   4  -4  366.86   19.60
   8   4   4  401.26   17.90
  10  -4   4   63.59    7.10
  10  -4   4   59.29    6.70
 -10  -4  -4   57.99    4.70
 -10  -4  -4   69.09    7.00
  10   4   4   64.89    7.30
 -10   4  -4   69.59    8.80
 -12  -4  -4   93.59    8.30
 -12  -4  -4   68.89    5.50
  12  -4   4   65.89    7.40
  12  -4   4   80.59    7.80
 -12   4  -4   93.09   10.50
  12   4   4   68.09    7.70
  14  -4   4  440.26   20.10
 -14  -4  -4  479.85   21.80
 -14  -4  -4  451.25   17.30
  14  -4   4  431.66   20.70
  14   4   4  428.56   20.30
 -14   4  -4  453.75   24.50
 -14   4  -4  461.85   16.90
  16  -4   4  541.85   22.70
 -16  -4  -4  550.74   25.20
 -16  -4  -4  503.85   20.40
  16  -4   4  534.25   24.30
  16   4   4  515.75   23.10
 -16   4  -4  542.75   19.60
 -18  -4  -4  219.18   15.70
  18  -4   4  238.28   13.70
 -18  -4  -4  216.48   11.70
  18  -4   4  215.28   15.10
 -18   4  -4  208.18   17.80
 -18   4  -4  210.48   11.00
 -20  -4  -4    4.70    4.90
  20  -4   4    3.90    3.80
 -20  -4  -4    3.60    2.50
  20  -4   4    4.40    4.60
 -20   4  -4    4.00    3.20
  20   4   4    3.20    2.90
  20   4   4    8.90    4.50
 -20   4  -4    3.40    4.40
 -23   5   4   61.59   10.40
 -21  -5   4  408.66   18.00
 -21  -5   4  407.86   20.00
 -21  -5   4  425.06   18.70
 -21   5   4  421.16   14.90
 -21   5   4  404.86   21.00
 -19  -5   4  135.39   10.80
 -19  -5   4  124.39   10.10
 -19  -5   4  147.59    9.40
 -19   5   4  134.89   11.00
 -19   5   4  152.58    7.00
 -17  -5   4  232.48   12.60
 -17  -5   4  190.38   17.10
 -17  -5   4  228.28   11.70
 -17   5   4  262.77    9.30
 -17   5   4  226.58   13.80
 -15  -5   4  587.54   22.50
 -15  -5   4  621.64   31.20
 -15  -5   4  610.84   23.70
 -15  -5   4  629.34   22.00
 -15  -5   4  582.94   21.50
 -15   5   4  595.84   24.10
  15   5  -4  595.74   20.00
 -15   5   4  610.84   18.20
 -13  -5   4  332.27   15.00
 -13  -5   4  365.56   21.60
 -13  -5   4  349.67   14.40
 -13  -5   4  361.36   16.40
 -13  -5   4  374.46   15.20
  13   5  -4  340.87   13.60
 -13   5   4  352.56   14.70
 -13   5   4  368.36   16.80
 -13   5   4  365.36   11.50
 -11  -5   4  251.77   12.60
 -11  -5   4  253.87   17.00
 -11  -5   4  246.68   10.80
 -11  -5   4  255.67   12.00
 -11  -5   4  233.88   11.80
 -11   5   4  233.38   11.60
 -11   5   4  230.98   12.80
  -9  -5   4  968.80   32.50
  -9  -5   4 1070.89   33.90
  -9  -5   4 1036.50   33.90
  -9  -5   4 1049.49   39.80
  -9   5   4 1033.30   28.80
  -9   5   4 1076.09   35.30
  -9   5   4 1050.39   30.30
   9   5  -4 1008.50   32.30
  -9   5   4  996.80   33.70
  -7  -5   4   63.09    7.80
  -7  -5   4   60.09    5.30
  -7  -5   4   53.49    5.80
  -7  -5   4   59.49    5.70
  -7   5   4   57.49    6.70
   7   5  -4   49.70   10.60
  -7   5   4   55.99    4.20
  -7   5   4   55.19    3.50
   7   5  -4   62.09    5.20
  -5  -5   4  411.86   15.70
  -5  -5   4  424.96   17.20
  -5  -5   4  409.16   17.40
  -5  -5   4  433.66   20.50
   5   5  -4  387.16   26.20
  -5   5   4  425.16   19.50
  -5   5   4  407.76   13.60
   5   5  -4  405.36   16.30
  -5   5   4  428.46   14.60
   3  -5  -4 1194.48   35.60
  -3  -5   4 1218.68   40.80
   3  -5  -4 1208.38   33.40
  -3  -5   4 1146.39   38.00
  -3  -5   4 1181.68   37.60
  -3  -5   4 1171.28   35.50
  -3   5   4 1168.08   33.80
   3   5  -4 1070.09   36.40
   3   5  -4 1174.78   33.70
  -3   5   4 1231.28   36.10
   3   5  -4 1219.78   44.40
  -3   5   4 1183.18   41.50
  -1  -5   4  589.34   21.40
  -1  -5   4  582.74   19.00
   1  -5  -4  570.74   18.00
  -1  -5   4  563.44   18.90
  -1  -5   4  549.74   22.80
  -1  -5   4  523.55   21.40
  -1   5   4  556.84   15.50
  -1   5   4  539.15   25.20
   1   5  -4  534.55   18.00
  -1   5   4  554.94   18.60
   1   5  -4  464.75   19.70
   1   5  -4  581.54   26.50
   1  -5   4  395.86   14.60
  -1  -5  -4  399.16   18.60
   1  -5   4  387.26   16.90
   1  -5   4  382.66   15.20
  -1  -5  -4  419.76   12.30
   1  -5   4  413.36   20.40
  -1  -5  -4  394.56   14.50
   1  -5   4  391.96   17.50
   1   5   4  397.16   12.00
  -1   5  -4  383.06   21.00
   1   5   4  376.06   14.00
  -1   5  -4  400.66   14.70
   1   5   4  388.86   14.70
  -3  -5  -4  420.56   23.70
   3  -5   4  482.35   20.00
   3  -5   4  468.85   19.80
  -3  -5  -4  447.66   18.40
   3  -5   4  470.15   19.10
   3  -5   4  472.45   16.30
  -3  -5  -4  472.55   14.50
   3  -5   4  463.25   17.90
  -3   5  -4  461.55   17.00
  -3   5  -4  454.65   23.10
   3   5   4  461.45   14.20
   3   5   4  456.25   20.40
   3   5   4  471.85   17.10
  -5  -5  -4   31.10    3.00
   5  -5   4   42.50    6.60
   5  -5   4   34.70    3.70
  -5  -5  -4   32.50    5.30
   5  -5   4   31.60    7.10
   5  -5   4   40.80    3.80
   5  -5   4   39.40    6.50
   5  -5   4   34.20    5.60
  -5   5  -4   32.00    7.00
   5   5   4   40.50    4.10
   5   5   4   35.00    2.70
   5   5   4   27.10    6.30
   7  -5   4 1506.95   47.80
   7  -5   4 1485.45   46.50
  -7  -5  -4 1539.05   45.80
  -7  -5  -4 1499.75   41.90
   7   5   4 1397.36   41.00
   7   5   4 1555.54   48.40
  -7   5  -4 1467.25   51.99
   7   5   4 1364.06   44.30
   9  -5   4 1287.77   42.50
   9  -5   4 1259.07   41.70
  -9  -5  -4 1271.57   37.00
  -9  -5  -4 1266.77   41.00
   9   5   4 1277.77   42.60
  -9   5  -4 1191.78   46.20
 -11  -5  -4   71.29    7.50
  11  -5   4   68.89    7.70
 -11  -5  -4   72.99    5.50
  11  -5   4   81.39    8.20
  11   5   4   75.59    8.20
 -11   5  -4   78.19   10.40
  13  -5   4  155.18   11.70
 -13  -5  -4  143.79   11.00
 -13  -5  -4  137.49    8.20
  13  -5   4  150.38   11.10
 -13   5  -4  147.19   14.10
  13   5   4  153.18   11.30
 -15  -5  -4  296.87   15.20
  15  -5   4  325.67   18.30
 -15  -5  -4  337.27   18.30
  15  -5   4  348.67   17.50
  15   5   4  298.77   16.90
  17  -5   4  369.86   20.90
 -17  -5  -4  433.06   22.10
 -17  -5  -4  423.06   17.20
  17  -5   4  397.96   19.60
  17   5   4  394.46   21.80
 -17   5  -4  392.06   25.30
 -19  -5  -4  860.91   37.90
  19  -5   4  985.80   35.30
 -19  -5  -4  952.80   32.50
 -19   5  -4  956.30   43.80
  19   5   4 1007.50   36.40
 -21  -5  -4   60.09    6.80
  21  -5   4   46.50    8.60
 -21  -5  -4   37.60    9.00
  21   5   4   44.30    8.00
  21   5   4   64.79    7.50
 -21   5  -4   40.00   10.90
 -21   5  -4   50.59    5.80
 -22  -6   4  133.79    9.90
 -22  -6   4  156.98   11.20
 -22  -6   4  158.48   12.40
 -22   6   4  153.58   13.80
 -22   6   4  159.18    7.50
 -20  -6   4  135.59   11.30
 -20  -6   4  136.99   10.10
 -20  -6   4  112.79    8.80
 -20   6   4  127.49   11.70
 -20   6   4  146.99    6.70
 -18  -6   4   -2.10    2.50
 -18  -6   4    4.10    3.50
 -18  -6   4   -2.70    2.00
 -18   6   4    2.80    2.50
 -18   6   4   -1.20    3.50
 -18   6   4    0.90    1.30
 -16  -6   4  263.47   14.50
 -16  -6   4  266.27   13.80
 -16  -6   4  238.88   12.20
  16   6  -4  251.97   12.70
 -16   6   4  261.77   15.80
 -16   6   4  232.38   11.50
 -14  -6   4  356.46   16.30
 -14  -6   4  364.36   16.20
 -14  -6   4  385.66   17.80
 -14  -6   4  355.16   15.00
 -14  -6   4  332.37   22.40
 -14   6   4  374.16   18.90
  14   6  -4  372.76   14.70
 -12  -6   4   65.39    5.50
 -12  -6   4   79.19   10.40
 -12  -6   4   74.79    7.40
 -12  -6   4   62.29    6.60
 -12  -6   4   68.79    6.50
  12   6  -4   61.79    5.50
 -12   6   4   69.49    8.50
 -10  -6   4   -2.10    2.50
 -10  -6   4    0.30    3.50
 -10  -6   4    2.30    2.00
 -10  -6   4    0.80    2.10
 -10  -6   4    3.90    3.30
 -10   6   4   -3.30    2.80
  10   6  -4    0.30    1.90
  -8  -6   4   55.79   15.60
  -8  -6   4   32.00    6.40
  -8  -6   4   18.10    3.90
  -8  -6   4   28.80    5.80
  -8   6   4   27.40    2.50
   8   6  -4   30.50    8.90
  -8   6   4   18.20    5.70
  -6  -6   4    4.00    3.00
  -6  -6   4    2.70    2.50
  -6  -6   4    3.80    3.10
  -6   6   4    5.70    4.00
   6   6  -4    3.40    1.30
  -6   6   4    4.90    1.40
  -6   6   4    4.30    2.20
   6   6  -4   -0.10    4.30
  -4  -6   4  557.64   30.20
  -4  -6   4  554.74   20.60
   4  -6  -4  623.64   18.90
   4  -6  -4  608.84   20.70
  -4  -6   4  572.84   23.30
  -4  -6   4  608.94   23.20
  -4   6   4  595.14   26.90
   4   6  -4  569.54   28.90
  -4   6   4  590.24   18.80
   4   6  -4  601.94   18.70
  -4   6   4  630.94   20.40
  -2  -6   4    9.20    4.00
  -2  -6   4    4.80    3.00
   2  -6  -4    5.60    2.00
   2  -6  -4   10.50    3.30
  -2  -6   4    3.50    2.20
  -2  -6   4    9.80    4.30
  -2   6   4    3.40    1.90
   2   6  -4    4.20    1.70
   2   6  -4    6.00    6.30
  -2   6   4   10.80    5.90
  -2   6   4    4.30    1.70
   0  -6   4   48.90    6.30
   0  -6   4   72.09    7.00
   0  -6  -4   68.19    5.10
   0  -6   4   59.49    5.00
   0  -6   4   59.39    6.90
   0  -6  -4   67.29    8.40
   0   6  -4   77.99   12.90
   0   6   4   52.49    4.20
   0   6   4   60.79    4.90
   0   6  -4   68.39    5.70
   0   6   4   59.99    2.90
  -2  -6  -4    3.10    1.30
   2  -6   4    1.10    2.10
   2  -6   4    4.50    3.40
   2  -6   4    3.70    2.60
   2  -6   4    2.80    1.80
   2   6   4    3.50    2.00
   2   6   4    2.40    0.90
  -2   6  -4    3.10    1.90
  -2   6  -4    9.00    5.60
  -4  -6  -4  314.77   13.80
  -4  -6  -4  324.77   10.90
   4  -6   4  325.67   15.90
   4  -6   4  285.57   15.80
   4  -6   4  322.57   12.60
   4  -6   4  292.87   14.40
  -4   6  -4  354.86   21.00
   4   6   4  294.07   10.40
   4   6   4  322.07   17.10
  -6  -6  -4   77.99    4.80
   6  -6   4   86.79    8.00
   6  -6   4   70.89    7.20
   6  -6   4   91.89    5.80
   6  -6   4   80.29    8.20
  -6  -6  -4   85.99    7.00
   6   6   4   82.49    4.40
   6   6   4   72.69    8.10
  -6   6  -4   75.19   13.40
   6   6   4   76.59    6.10
  -8  -6  -4  365.56   16.70
  -8  -6  -4  361.96   13.40
   8  -6   4  381.76   13.90
   8  -6   4  360.96   18.30
   8  -6   4  374.66   17.90
   8  -6   4  348.27   17.50
  -8   6  -4  397.06   22.70
   8   6   4  374.06   18.60
 -10  -6  -4   20.90    3.50
 -10  -6  -4   30.80    6.50
  10  -6   4   32.30    6.90
  10  -6   4   30.50    4.00
  10  -6   4   24.90    5.20
  10  -6   4   30.10    6.80
 -10   6  -4   45.90   10.40
  10   6   4   29.10    6.70
  12  -6   4  188.68    8.70
 -12  -6  -4  191.08   12.80
  12  -6   4  193.78   13.50
 -12  -6  -4  194.58    9.70
  12  -6   4  184.38   13.00
  12   6   4  181.68   12.70
 -12   6  -4  210.18   17.20
  14  -6   4  428.66   21.00
  14  -6   4  420.16   21.80
  14  -6   4  459.05   15.60
 -14  -6  -4  414.06   16.90
 -14  -6  -4  456.85   21.70
  14   6   4  423.66   20.70
 -14   6  -4  421.46   36.90
  16  -6   4  311.47   18.90
  16  -6   4  320.87   17.50
  16  -6   4  323.47   12.10
 -16  -6  -4  313.67   18.60
 -16  -6  -4  307.47   14.20
  16   6   4  285.57   17.60
 -16   6  -4  316.67   23.00
  18  -6   4   21.20    4.10
 -18  -6  -4   24.10    6.40
 -18  -6  -4   20.80    4.20
  18  -6   4   26.10    8.10
  18  -6   4   24.90    6.70
  18  -6   4   32.30    3.50
  18   6   4   28.70    6.80
 -18   6  -4   20.80    8.10
 -20  -6  -4  185.38   11.40
 -20  -6  -4  181.78   15.30
  20  -6   4  204.18   16.00
  20  -6   4  182.48   15.40
  20   6   4  198.98   14.10
 -20   6  -4  182.48   18.90
 -21  -7   4    2.20    3.00
 -21   7   4    3.50    4.90
 -19  -7   4    9.00    4.10
 -19  -7   4   11.80    3.90
 -19  -7   4    9.20    4.70
 -19   7   4   25.60    7.90
 -17  -7   4   13.50    3.40
 -17  -7   4   13.70    5.30
 -17  -7   4   19.10    4.90
  17   7  -4   11.90    4.10
 -15  -7   4   64.29    6.20
 -15  -7   4   61.79    7.50
 -15  -7   4   63.29    7.20
 -15   7   4   46.40    9.40
 -13  -7   4   16.90    6.30
 -13  -7   4   10.40    3.70
 -13  -7   4   20.90    5.10
 -13  -7   4   12.50    3.60
 -13   7   4   20.80    7.00
 -11  -7   4   10.80    4.00
 -11  -7   4    8.80    3.90
 -11  -7   4    5.60    3.50
 -11  -7   4   11.10    3.30
 -11   7   4    8.60    5.20
  -9  -7   4  180.58   10.40
  -9  -7   4  169.88    8.90
  -9  -7   4  175.48   11.50
  -9  -7   4  186.38   11.60
   9  -7  -4  151.38    7.10
  -9   7   4  153.08    6.60
  -9   7   4  175.88    8.80
   9   7  -4  175.28   16.60
  -9   7   4  171.18   14.10
  -7  -7   4   35.30    6.40
  -7  -7   4   32.60    5.80
   7  -7  -4   28.90    3.30
   7  -7  -4   26.30    2.80
  -7  -7   4   49.80    6.80
  -7   7   4   35.20    4.00
   7   7  -4   45.60   11.50
  -7   7   4   36.20    3.10
  -7   7   4   41.40    9.70
   5  -7  -4    0.90    1.40
  -5  -7   4   -2.00    3.30
  -5  -7   4   -0.80    2.40
  -5  -7   4   -0.80    1.70
  -5  -7   4    1.60    3.60
  -5   7   4    0.90    1.80
  -5   7   4   -2.70    4.10
   5   7  -4    2.00    5.10
   5   7  -4    1.90    1.60
   3  -7  -4  308.07   12.10
  -3  -7   4  297.17   16.10
  -3  -7   4  314.47   15.80
  -3  -7   4  291.47   13.30
   3   7  -4  303.07   21.60
  -3   7   4  294.87   19.60
   3   7  -4  314.77   11.90
  -3   7   4  316.17   13.30
  -3   7   4  301.57   11.60
  -1  -7   4   23.70    5.90
   1  -7  -4   29.30    4.60
  -1  -7   4   27.30    6.60
  -1  -7   4   34.80    5.00
   1   7  -4   24.60    9.30
   1   7  -4   29.40    3.60
  -1   7   4   29.40    3.80
  -1   7   4   31.80    9.40
  -1  -7  -4  188.98    6.60
  -1  -7  -4  182.38    9.70
   1  -7   4  190.08   12.00
   1  -7   4  188.38   12.60
   1  -7   4  173.38    9.20
  -1   7  -4  181.98   16.60
  -1   7  -4  164.28    9.00
   1   7   4  184.68    9.90
   1   7   4  183.88    6.40
   3  -7   4   41.20    6.50
  -3  -7  -4   57.09    5.60
   3  -7   4   55.49    9.20
   3  -7   4   58.59    5.10
  -3  -7  -4   59.99    3.60
  -3   7  -4   50.09   10.30
   3   7   4   53.49    3.20
   3   7   4   51.79    5.10
  -5  -7  -4   27.80    2.90
   5  -7   4   41.80    8.70
   5  -7   4   45.40    5.70
   5  -7   4   41.20    7.50
  -5  -7  -4   39.00    6.70
  -5   7  -4   27.20    8.60
   5   7   4   32.80    2.70
   5   7   4   31.50    7.40
  -7  -7  -4   31.20    3.40
   7  -7   4   31.50    7.00
  -7  -7  -4   33.10    6.00
   7  -7   4   38.80    4.10
   7  -7   4   34.00    7.50
   7   7   4   34.20    7.50
  -7   7  -4   31.70    8.50
  -9  -7  -4  216.08    9.70
  -9  -7  -4  213.18   12.80
   9  -7   4  230.58   14.70
   9  -7   4  219.58    9.90
   9  -7   4  236.28   14.60
  -9   7  -4  217.58   18.10
   9   7   4  211.08   14.10
  11  -7   4   41.20    8.30
  11  -7   4   34.90    7.50
 -11  -7  -4   39.80    7.10
 -11  -7  -4   36.30    4.40
  11  -7   4   39.70    4.10
 -11   7  -4   52.59   12.80
  11   7   4   39.80    7.60
 -13  -7  -4   -0.50    2.10
  13  -7   4    2.30    1.90
 -13  -7  -4    0.70    3.40
  13  -7   4    0.10    3.70
  13  -7   4    2.40    3.90
 -13   7  -4   -1.10    3.90
  13   7   4    0.60    3.70
  15  -7   4   12.60    5.50
  15  -7   4    7.50    5.00
  15  -7   4   16.80    2.90
 -15  -7  -4   13.50    6.20
 -15  -7  -4   11.20    3.30
 -15   7  -4   16.40    8.60
 -17  -7  -4   -2.00    2.90
  17  -7   4    4.60    4.40
  17  -7   4    6.30    2.30
  17  -7   4    6.60    5.30
 -17  -7  -4    2.60    2.80
  17   7   4    5.50    4.60
 -17   7  -4    5.60    5.80
 -19  -7  -4   61.19    6.80
  19  -7   4   67.39   10.10
 -19  -7  -4   82.89   13.30
  19  -7   4   67.29   10.50
  19   7   4   59.39    9.10
 -19   7  -4   87.99   17.90
 -18  -8   4   23.00    5.00
 -18  -8   4   26.80    6.90
 -18  -8   4   24.20    6.10
 -18   8   4   40.90   10.20
 -16  -8   4  370.86   16.80
 -16  -8   4  420.16   20.80
 -16  -8   4  402.36   19.00
 -16   8   4  395.86   23.70
 -14  -8   4  337.17   18.30
 -14  -8   4  356.46   15.40
 -14  -8   4  331.67   18.30
 -14  -8   4  362.06   17.40
 -14   8   4  343.37   22.30
 -12  -8   4   41.40    6.00
 -12  -8   4   45.50    7.70
 -12  -8   4   36.70    7.00
 -12   8   4   49.40   10.30
 -10  -8   4   65.29    7.60
 -10  -8   4   63.39    5.70
 -10  -8   4   65.79    7.00
 -10  -8   4   67.69    8.20
 -10   8   4   75.19   12.30
  -8  -8   4  145.89   10.90
  -8  -8   4  147.09    8.10
  -8  -8   4  146.19   11.30
  -8  -8   4  125.79    9.10
   8  -8  -4  138.99    7.00
   8   8  -4  181.78   17.50
  -8   8   4  112.29    5.90
  -8   8   4  156.18   14.90
  -8   8   4  117.79    7.80
  -6  -8   4  177.78   12.10
   6  -8  -4  176.48    8.50
  -6  -8   4  177.68   10.60
  -6  -8   4  179.78   12.70
  -6   8   4  176.98   15.90
   6   8  -4  175.28   17.40
  -6   8   4  171.58    7.80
   6   8  -4  184.68    8.00
  -6   8   4  168.98    9.60
  -4  -8   4  851.11   31.40
  -4  -8   4  799.82   31.90
  -4  -8   4  813.12   28.20
   4  -8  -4  818.42   26.10
  -4   8   4  776.92   25.10
   4   8  -4  765.62   26.70
  -4   8   4  804.82   37.40
  -4   8   4  802.22   27.60
   4   8  -4  884.71   41.20
  -2  -8   4   75.69    6.50
   2  -8  -4   75.19    5.90
  -2  -8   4   79.59    8.90
  -2  -8   4   76.49    8.20
  -2   8   4   55.39   12.00
   2   8  -4   81.99    5.80
   2   8  -4   59.59   12.90
  -2   8   4   72.89    6.10
   0  -8   4   10.10    3.00
   0  -8   4    7.60    3.70
   0  -8  -4    9.10    3.10
   0  -8   4   11.60    5.20
   0   8  -4   10.30    6.70
   0   8   4    6.60    4.30
   0   8   4   21.00    8.10
   2  -8   4  210.28   14.10
  -2  -8  -4  204.58   10.80
   2  -8   4  196.98   10.20
  -2  -8  -4  185.58    7.10
   2  -8   4  196.48   13.10
   2   8   4  189.18    6.80
  -2   8  -4  193.48   18.30
   2   8   4  180.68   10.40
   4  -8   4  334.77   18.80
  -4  -8  -4  332.47   11.50
  -4  -8  -4  340.97   15.60
   4  -8   4  354.36   14.30
   4  -8   4  345.27   18.10
  -4   8  -4  341.57   24.20
   4   8   4  329.07   11.20
   6  -8   4  275.57   12.00
  -6  -8  -4  278.27   14.10
   6  -8   4  294.17   17.30
   6  -8   4  255.27   15.60
  -6  -8  -4  254.67   10.10
   6   8   4  247.38   16.30
  -6   8  -4  254.07   21.00
   6   8   4  240.58    9.40
   8  -8   4  351.36   18.90
   8  -8   4  353.36   19.60
   8  -8   4  350.86   14.00
  -8  -8  -4  347.07   13.20
  -8  -8  -4  349.07   17.30
  -8   8  -4  370.96   25.30
   8   8   4  348.77   19.30
  10  -8   4    4.90    4.20
  10  -8   4    4.80    2.30
  10  -8   4   -0.10    3.80
 -10  -8  -4    2.70    2.00
 -10  -8  -4    2.60    3.70
 -10   8  -4    2.00    5.80
  10   8   4    1.00    4.50
 -12  -8  -4  142.39    8.40
  12  -8   4  151.68    7.90
 -12  -8  -4  147.09   11.70
  12  -8   4  143.99   12.30
 -12   8  -4  153.68   17.10
  12   8   4  144.49   12.20
  14  -8   4  386.96   21.50
 -14  -8  -4  378.56   16.00
  14  -8   4  405.06   14.50
 -14  -8  -4  373.86   21.30
 -14   8  -4  401.96   27.70
  14   8   4  397.06   20.80
  16  -8   4  127.89   12.40
  16  -8   4  129.99   12.50
 -16  -8  -4  129.39    8.80
 -16  -8  -4  151.78   12.90
  16  -8   4  129.79    6.90
  16   8   4  139.09   12.30
 -16   8  -4  137.19   16.70
 -17  -9   4  576.14   25.10
 -17  -9   4  554.64   22.80
 -17  -9   4  610.04   27.30
 -17   9   4  617.84   32.70
 -15  -9   4  184.08   10.80
 -15  -9   4  150.98   11.60
 -15  -9   4  180.28   13.50
 -15   9   4  186.68   17.30
 -13  -9   4  263.07   12.80
 -13  -9   4  254.07   16.10
 -13  -9   4  259.37   14.90
 -13  -9   4  263.27   16.90
 -13   9   4  268.37   20.80
 -11  -9   4   78.19    8.90
 -11  -9   4   81.89    8.10
 -11  -9   4   90.79    6.90
 -11  -9   4   99.09   10.30
  -9  -9   4  135.89   12.10
  -9  -9   4  120.19    9.50
   9  -9  -4  136.59    7.40
  -9  -9   4  134.29   11.20
  -9  -9   4  127.79    8.10
   9   9  -4  153.28   18.50
  -9   9   4  150.98   15.30
  -9   9   4  139.49    8.80
  -9   9   4  135.09    6.20
   7  -9  -4  116.89    7.20
  -7  -9   4  108.39   10.50
  -7  -9   4  117.89   11.20
  -7  -9   4  135.49   21.50
   7   9  -4  116.19    6.30
   7   9  -4   96.09   18.30
  -7   9   4  116.79    6.10
  -7   9   4  109.89   17.30
  -7   9   4  117.79    8.20
  -5  -9   4  446.96   21.60
  -5  -9   4  434.96   22.40
   5  -9  -4  439.36   17.00
  -5  -9   4  472.55   19.50
  -5   9   4  469.65   19.00
   5   9  -4  460.05   16.30
   5   9  -4  470.25   30.80
  -5   9   4  456.45   27.80
  -3  -9   4   17.40    5.40
  -3  -9   4   18.10    6.40
  -3  -9   4   17.60    4.40
  -3   9   4    1.80    7.00
   3   9  -4    6.80    7.30
  -3   9   4   22.90    5.20
  -1  -9   4  259.77   16.70
  -1  -9   4  263.37   13.00
   1  -9  -4  250.97   12.20
  -1  -9   4  258.37   15.70
  -1   9   4  219.98   20.60
  -1   9   4  235.18   12.60
   1   9  -4  246.78   22.40
  -1  -9  -4  118.79    8.30
   1  -9   4  103.89    7.80
   1  -9   4   87.59    9.40
   1  -9   4  125.29   11.40
  -1   9  -4   83.59   15.00
   1   9   4  136.69   16.70
  -3  -9  -4  128.29    5.60
   3  -9   4  121.99   10.90
   3  -9   4  132.89   11.90
   3  -9   4  127.79    8.50
  -3  -9  -4  118.89    8.90
  -3   9  -4  141.49   17.20
  -5  -9  -4  189.38    8.00
  -5  -9  -4  196.48   11.60
   5  -9   4  172.58   16.00
   5  -9   4  209.38   10.60
   5  -9   4  207.18   14.20
  -5  -9  -4  195.58   12.00
   5   9   4  190.08    7.60
  -5   9  -4  193.58   19.70
   5   9   4  196.18   15.20
  -7  -9  -4  434.96   19.70
  -7  -9  -4  421.56   14.70
  -7  -9  -4  395.06   18.60
   7  -9   4  405.56   21.40
   7  -9   4  406.56   23.40
   7  -9   4  439.46   16.80
   7   9   4  440.46   22.80
  -7   9  -4  375.56   27.70
   9  -9   4  134.99   12.10
  -9  -9  -4  145.09   11.30
  -9  -9  -4  155.78   10.90
   9  -9   4  164.08   14.00
   9  -9   4  152.38    8.60
  -9  -9  -4  148.49    7.80
  -9   9  -4  160.18   17.80
   9   9   4  129.29   14.20
 -11  -9  -4  469.45   22.20
  11  -9   4  454.75   16.90
 -11  -9  -4  444.96   16.90
  11  -9   4  482.65   24.70
 -11   9  -4  427.46   30.30
  11   9   4  430.26   23.00
 -13  -9  -4  109.39   10.70
 -13  -9  -4  109.39    7.60
  13  -9   4  108.99    6.90
  13  -9   4   97.29   11.10
  13  -9   4  115.49   12.00
  13   9   4  106.59   11.10
 -13   9  -4   72.39   14.50
 -15  -9  -4  228.78   11.90
  15  -9   4  243.58   17.00
 -15  -9  -4  245.78   16.50
  15  -9   4  235.08   10.10
  15  -9   4  230.28   16.90
  15   9   4  233.58   16.10
 -15   9  -4  194.78   20.80
 -14 -10   4   60.89    6.60
 -14 -10   4   89.09   10.30
 -14 -10   4   80.29    8.60
 -14  10   4   54.89   13.60
 -12 -10   4  212.38   13.80
 -12 -10   4  226.68   11.60
  12 -10  -4  169.58    9.30
 -12 -10   4  222.78   15.30
 -12  10   4  256.57   21.50
 -10 -10   4   35.00    7.20
  10 -10  -4   45.40    4.50
 -10 -10   4   35.90    5.50
 -10 -10   4   34.80    7.80
 -10  10   4   43.70   12.90
   8 -10  -4   88.09    6.40
  -8 -10   4   90.09    8.60
  -8 -10   4  102.09   10.30
  -8 -10   4   92.59   16.30
   8  10  -4   70.29   15.10
  -8  10   4   75.89    4.90
  -8  10   4   62.89   13.60
  -8  10   4   83.19    7.30
  -6 -10   4   25.30    7.80
   6 -10  -4   36.20    5.40
  -6 -10   4   32.30    7.70
  -6 -10   4   13.00    4.30
   6  10  -4   24.20   12.60
  -6  10   4   23.40    4.90
   6  10  -4   27.70    4.00
  -6  10   4   34.50    9.70
   4 -10  -4   59.09    5.90
  -4 -10   4   59.89   11.10
  -4 -10   4   56.69    6.70
  -4 -10   4   63.69   10.50
  -4  10   4   43.40   12.40
  -4  10   4   70.29   10.90
   4  10  -4   31.40   11.00
   2 -10  -4  134.89    8.80
  -2 -10   4  117.29   11.50
  -2 -10   4  112.19    8.90
  -2 -10   4  124.09   12.30
  -2  10   4  106.69   18.20
   2  10  -4  143.39   18.70
   0 -10  -4  169.38   10.40
   0 -10   4  156.98   10.30
   0  10  -4  146.59   19.40
   0  10   4  174.18   19.60
   2 -10   4    1.10    3.00
  -2 -10  -4    5.30    3.30
   2 -10   4    0.10    4.20
  -2  10  -4   -3.70    7.00
  -4 -10  -4  130.99    6.00
   4 -10   4  138.29    9.10
   4 -10   4  113.59   12.30
  -4 -10  -4  135.79   10.10
  -4  10  -4  113.69   20.60
  -6 -10  -4  109.39    9.30
   6 -10   4   80.89   14.50
   6 -10   4   85.79   10.90
  -6 -10  -4   84.29    8.20
   6 -10   4   89.09    7.30
  -6 -10  -4   89.09    5.30
  -6  10  -4   88.19   18.40
   6  10   4   95.29   11.10
   8 -10   4  173.18    9.80
   8 -10   4  167.18   13.70
  -8 -10  -4  160.98   12.10
  -8 -10  -4  167.18   11.60
   8 -10   4  161.28   14.40
  -8 -10  -4  189.28    8.50
  -8  10  -4  184.48   20.70
   8  10   4  179.48   14.90
  10 -10   4  163.08   13.60
 -10 -10  -4  155.08    8.40
 -10 -10  -4  160.18   12.70
  10 -10   4  152.18   14.10
  10 -10   4  165.58    9.20
 -10 -10  -4  144.69   11.20
 -10  10  -4  119.59   20.20
  10  10   4  130.39   13.00
  12 -10   4  124.59    7.50
 -12 -10  -4  105.09    8.60
 -12 -10  -4  112.49   11.20
  12 -10   4  120.19   13.10
  12 -10   4  104.19   11.60
 -12  10  -4  124.49   22.30
  12  10   4  114.69   12.10
  14  10   4   25.00    7.10
 -14  10  -4   38.50   13.80
 -13 -11   4   -1.00    3.20
 -13 -11   4    4.80    4.10
  13 -11  -4   -1.20    2.20
 -13 -11   4   -3.50    2.30
 -13  11   4    1.70    7.30
  11 -11  -4    0.50    2.40
 -11 -11   4   -2.10    4.10
 -11 -11   4    0.20    3.60
 -11 -11   4   -0.50    3.30
 -11 -11   4    2.30    2.80
 -11  11   4    5.60    8.40
  -9 -11   4   11.20    5.10
  -9 -11   4   14.00    4.10
   9 -11  -4   24.60    4.40
  -9 -11   4   10.90    6.00
  -9 -11   4   12.20    5.10
   9  11  -4    9.50   10.60
  -9  11   4   17.80    9.30
   9  11  -4   13.40    3.80
  -7 -11   4   73.89    6.30
  -7 -11   4   71.99    8.00
  -7 -11   4   64.69   11.30
  -7 -11   4   50.39    8.70
   7  11  -4   56.89   16.70
  -7  11   4   66.09   16.30
  -5 -11   4   10.30    5.80
  -5 -11   4    4.40    3.80
   5 -11  -4    4.70    3.10
  -5 -11   4    5.90    3.30
  -5 -11   4    8.40    5.90
   5  11  -4    2.70    9.00
  -5  11   4    4.70    7.30
  -3 -11   4   19.30    7.10
  -3 -11   4    7.40    4.40
  -3 -11   4   16.60    5.90
   3 -11  -4   15.20    4.20
  -3  11   4   17.80   11.70
   3  11  -4   24.30   11.70
  -1 -11   4    4.60    5.20
   1 -11  -4    9.40    3.80
  -1 -11   4    5.90    4.90
  -1 -11   4    9.50    4.00
  -1  11   4   12.40   10.90
   1  11  -4    6.70   16.10
   1 -11   4    6.80    4.50
   1 -11   4    6.10    5.50
  -1 -11  -4    8.90    3.30
   1 -11   4   10.50    4.20
   1  11   4   11.40    9.00
  -1  11  -4    9.60    8.60
   3 -11   4   45.10   10.60
   3 -11   4   30.30    7.50
   3 -11   4   57.99    8.10
  -3 -11  -4   44.00    7.30
  -3  11  -4   23.60   10.40
  -5 -11  -4    9.30    4.00
   5 -11   4   11.50    5.10
  -5 -11  -4   18.20    2.70
  -5 -11  -4   18.70    5.60
   5 -11   4   20.20    8.30
   5 -11   4   12.40    4.20
  -5  11  -4   17.40   10.70
   5  11   4   13.60    6.90
  -7 -11  -4   13.90    5.50
   7 -11   4   10.80    6.30
  -7 -11  -4    7.70    3.90
   7 -11   4   12.40    3.50
   7 -11   4    8.60    6.00
  -7 -11  -4    8.10    2.40
   7  11   4    5.80    5.00
  -7  11  -4   13.90   11.80
  -9 -11  -4    7.30    4.00
   9 -11   4   14.10    3.70
  -9 -11  -4   10.40    2.80
  -9 -11  -4   16.20    5.80
   9 -11   4   10.70    7.00
   9 -11   4    8.90    5.40
   9  11   4    2.10    5.30
  -9  11  -4    6.00    7.80
  11 -11   4   -3.00    3.90
  11 -11   4    4.10    5.20
  11 -11   4    6.20    3.00
 -11 -11  -4    0.30    3.80
 -11  11  -4   10.50    7.70
  11  11   4   -0.90    3.80
  -8 -12   4   27.70    5.00
  -8 -12   4   34.40    7.60
  -8 -12   4   19.00    6.30
  -8 -12   4   29.40    8.70
   8 -12  -4   36.80    6.10
   8  12  -4   28.40   14.10
  -8  12   4   23.40   10.10
  -6 -12   4    8.30    3.20
  -6 -12   4   22.40    7.80
  -6 -12   4    6.90    4.70
   6 -12  -4   12.70    4.10
  -6 -12   4    4.20    3.80
   6  12  -4   16.20   11.10
  -6  12   4    5.00    7.50
   4 -12  -4   37.00    6.10
  -4 -12   4   11.60    5.20
  -4 -12   4   26.00    7.90
  -4 -12   4   24.30    4.60
  -4 -12   4   23.40    5.30
   4  12  -4   13.10   10.20
  -4  12   4   13.00    9.50
   2 -12  -4   29.90    6.10
  -2 -12   4   17.70    6.80
  -2 -12   4   17.10    6.60
  -2 -12   4   25.40    6.50
   2  12  -4   34.10   12.90
  -2  12   4   26.60   13.20
   0 -12   4   21.40    7.20
   0 -12   4   22.30    6.20
   0 -12  -4   23.70    5.50
   0 -12   4   14.20    7.80
   0  12  -4   30.70   15.60
   0  12   4    8.10    8.60
   2 -12   4   12.50    7.80
   2 -12   4    2.80    3.30
  -2 -12  -4   10.00    4.00
   2 -12   4    3.80    4.20
  -2  12  -4   -3.80    8.60
   4 -12   4   13.60    5.70
  -4 -12  -4   27.90    6.50
   4 -12   4   14.50    7.00
   4 -12   4   14.20    4.40
  -4  12  -4   15.60   10.50
   6 -12   4    2.40    4.70
   6 -12   4    6.20    6.00
  -6 -12  -4    3.30    3.80
   6 -12   4    9.80    3.60
  -6 -12  -4    4.90    1.90
  -6  12  -4   17.70   13.90
   6  12   4    8.60    6.70
 -24   0   5   -0.70    2.10
 -24   0   5   -3.90    3.00
 -24   0   5   -0.90    1.90
 -22   0   5   -0.50    2.70
 -22   0   5   -0.60    2.40
 -22   0   5    0.80    1.90
 -20   0   5    1.10    2.30
 -20   0   5    0.70    2.10
 -20   0   5    0.90    1.80
 -18   0   5   -0.40    1.90
 -18   0   5    1.40    1.90
 -18   0   5    2.10    2.10
 -16   0   5   -1.80    1.50
 -16   0   5   -1.10    1.50
 -16   0   5    0.80    1.50
 -16   0   5   -0.90    1.20
 -14   0   5    2.00    1.40
 -14   0   5   -1.90    1.20
 -14   0   5    0.90    1.40
 -14   0   5   -0.30    1.50
 -12   0   5   -0.50    1.30
 -12   0   5    1.80    1.70
 -10   0   5    0.80    1.50
 -10   0   5    0.10    1.50
  -8   0   5    0.30    1.50
  -8   0   5   -0.90    1.40
  -8   0   5    0.30    1.60
  -6   0   5    0.40    1.60
  -4   0   5    0.50    1.50
  -4   0   5    1.70    1.90
  -4   0   5    0.40    1.20
  -2   0   5    0.80    1.30
  -2   0   5    1.60    1.90
  -2   0   5    0.00    2.00
   0   0   5   -0.20    1.40
   0   0   5    1.20    1.60
   0   0   5    1.20    1.90
   0   0  -5    0.40    1.50
   0   0  -5   -1.00    0.90
   2   0   5    0.10    1.80
  -2   0  -5    1.10    1.70
   2   0   5   -0.10    2.10
  -2   0  -5    2.70    2.10
   2   0   5    1.00    1.50
   4   0   5    2.30    2.10
   4   0   5    0.90    0.90
   4   0   5    2.50    1.70
  -4   0  -5   -0.20    1.90
   4   0   5    1.90    2.40
  -4   0  -5    0.30    1.50
   6   0   5   -0.90    1.60
   6   0   5    2.00    1.70
   6   0   5   -0.80    1.90
  -6   0  -5    2.30    2.70
   8   0   5   -0.80    1.90
  -8   0  -5   -1.30    1.90
  -8   0  -5   -0.80    1.20
   8   0   5    1.10    1.50
   8   0   5    1.30    2.20
  10   0   5    0.20    2.60
 -10   0  -5   -0.50    1.40
  10   0   5    1.00    2.90
 -10   0  -5   -0.80    2.40
 -12   0  -5   -2.00    3.20
  12   0   5    2.90    2.60
 -12   0  -5    0.30    1.70
  12   0   5    0.70    3.00
 -14   0  -5   -1.80    3.20
  14   0   5    2.00    3.10
  14   0   5   -2.00    2.30
 -14   0  -5    0.90    2.20
 -16   0  -5   -0.80    2.00
 -16   0  -5   -1.90    4.10
  16   0   5   -1.40    2.90
  18   0   5    1.20    4.20
  18   0   5    1.90    3.60
 -18   0  -5   -0.30    2.20
 -18   0  -5    2.10    4.20
  20   0   5    1.00    3.30
  20   0   5   -1.80    3.80
 -20   0  -5   -2.00    4.40
 -20   0  -5   -2.40    1.90
 -23  -1   5   25.90    5.90
 -23  -1   5   29.50    4.60
 -23  -1   5   21.90    4.70
 -23  -1   5   29.60    9.10
 -23   1   5   25.10    4.50
 -23   1   5   30.80    6.50
 -21  -1   5  566.74   19.70
 -21  -1   5  565.64   22.20
 -21  -1   5  552.44   20.70
 -21  -1   5  550.94   28.60
 -21   1   5  500.55   19.00
 -21   1   5  547.95   17.70
 -21   1   5  568.64   21.90
 -21   1   5  534.15   21.80
 -19  -1   5  416.46   16.70
 -19  -1   5  401.86   17.00
 -19  -1   5  434.56   16.10
 -19  -1   5  378.36   22.10
 -19   1   5  414.16   15.40
 -19   1   5  412.26   17.10
 -19   1   5  422.36   16.00
 -19   1   5  450.25   14.70
 -17  -1   5  120.69    7.20
 -17  -1   5  107.89    7.20
 -17  -1   5  120.29    7.50
 -17  -1   5  120.49   11.20
 -17   1   5  123.69    6.20
 -17   1   5  116.09    6.90
 -17   1   5  103.59    7.00
 -17   1   5  118.79    7.20
 -15  -1   5  264.67   11.20
 -15  -1   5  259.47   11.00
 -15  -1   5  246.38   10.80
 -15  -1   5  253.57   15.00
 -15   1   5  252.67   10.30
 -15   1   5  259.97   10.00
 -15   1   5  259.77   10.70
 -15   1   5  243.18   10.20
 -13  -1   5  354.36   13.70
 -13  -1   5  379.96   17.80
 -13  -1   5  347.77   13.10
 -13  -1   5  393.96   14.10
 -13   1   5  376.76   13.30
 -13   1   5  373.56   12.90
 -11  -1   5  504.45   16.40
 -11  -1   5  484.95   20.00
 -11  -1   5  505.25   17.30
 -11  -1   5  525.65   17.60
 -11   1   5  503.25   17.60
 -11   1   5  504.75   16.50
 -11   1   5  512.55   16.50
  -9  -1   5 2132.09   62.99
  -9  -1   5 2188.08   60.79
  -9  -1   5 2186.38   59.49
  -9  -1   5 2266.47   61.89
  -7  -1   5  139.99    7.80
  -7  -1   5  136.49    6.50
  -7  -1   5  131.79    7.70
  -7  -1   5  143.39    6.20
  -7  -1   5  137.79    7.00
  -5  -1   5   88.59    6.40
  -5  -1   5   87.99    5.60
  -5  -1   5   88.69    4.70
  -5  -1   5   80.49    5.10
  -5   1   5   82.19    6.30
  -3  -1   5 1164.98   34.30
  -3  -1   5 1165.08   34.40
  -3  -1   5 1149.58   36.20
  -3   1   5 1149.08   32.40
  -3   1   5 1144.39   35.90
  -1  -1   5  421.76   15.50
  -1  -1   5  393.36   15.00
  -1  -1   5  406.26   16.60
   1   1  -5  406.96   15.10
   1   1  -5  395.06   15.80
  -1   1   5  415.46   13.80
  -1   1   5  410.86   16.40
  -1   1   5  400.46   12.80
  -1  -1  -5  247.08   10.50
   1  -1   5  236.58   12.00
   1  -1   5  245.48    8.90
   1  -1   5  243.98   11.10
   1  -1   5  247.38   11.00
   1   1   5  237.28    9.90
   1   1   5  242.78    8.70
  -1   1  -5  235.68   10.80
  -1   1  -5  239.38   11.60
   1   1   5  255.07   12.10
   3  -1   5  220.68    8.50
  -3  -1  -5  225.58   11.30
   3  -1   5  250.07   11.10
   3  -1   5  222.48   11.10
   3  -1   5  239.38   12.10
  -3  -1  -5  220.48   10.70
   3   1   5  201.58   11.30
  -3   1  -5  231.88   10.90
   3   1   5  221.58    9.90
  -3   1  -5  239.08   12.00
   3   1   5  214.78    8.90
  -5  -1  -5   30.70    3.10
   5  -1   5   31.40    2.80
   5  -1   5   34.20    5.50
   5  -1   5   37.80    4.30
  -5  -1  -5   37.20    5.80
  -5  -1  -5   36.50    4.50
   5  -1   5   48.00    6.90
   5   1   5   48.90    7.10
  -5   1  -5   40.20    6.70
   5   1   5   36.40    2.90
  -5   1  -5   32.30    4.80
   5   1   5   31.00    3.60
  -7  -1  -5  295.97   14.60
   7  -1   5  300.07   14.90
  -7  -1  -5  295.77   11.50
   7  -1   5  288.97   14.20
   7  -1   5  305.87   13.60
   7   1   5  303.07   14.80
  -7   1  -5  293.67   15.40
  -9  -1  -5  339.37   12.90
  -9  -1  -5  316.87   16.10
   9  -1   5  326.97   15.90
   9  -1   5  316.87   15.70
  -9   1  -5  342.57   17.40
   9   1   5  323.87   16.00
   9   1   5  302.57   14.90
  -9   1  -5  315.77   12.70
   9   1   5  326.97   16.00
  11  -1   5    9.60    3.80
 -11  -1  -5    7.20    2.70
 -11  -1  -5   10.40    4.60
  11  -1   5    7.70    4.10
  11   1   5    6.80    4.30
 -11   1  -5    4.80    3.70
 -11   1  -5    5.60    2.00
  11   1   5    9.50    4.60
  13  -1   5   91.09    8.70
 -13  -1  -5   85.89    6.50
  13  -1   5   96.39    8.80
 -13  -1  -5   94.39    9.70
 -13   1  -5   95.59    6.70
  13   1   5   98.99    8.80
 -13   1  -5   91.19    9.90
  13   1   5   88.39    8.60
 -15  -1  -5  215.58   11.30
  15  -1   5  222.38   13.20
 -15  -1  -5  185.68   14.40
  15  -1   5  191.88   13.30
 -15   1  -5  187.78   14.90
  15   1   5  203.08   13.60
 -15   1  -5  192.18   10.60
  15   1   5  214.58   12.90
  17  -1   5   90.49    8.70
  17  -1   5   85.99    9.20
 -17  -1  -5   72.59    6.60
 -17  -1  -5  110.19   19.00
 -17   1  -5   64.79   12.80
 -17   1  -5   86.49    7.10
  17   1   5   83.59    9.20
  17   1   5   74.49    8.10
 -19  -1  -5  229.78   12.50
  19  -1   5  230.38   13.80
 -19  -1  -5  252.07   18.30
  19  -1   5  232.98   15.80
  19   1   5  243.48   14.20
 -19   1  -5  272.07   19.60
 -19   1  -5  205.38   11.90
  19   1   5  228.58   15.50
 -21  -1  -5   94.29    8.10
  21  -1   5   94.49   10.50
  21  -1   5   74.49    8.20
 -21  -1  -5   84.49   14.90
 -21   1  -5   73.99   12.40
  21   1   5   80.99    9.90
 -21   1  -5   69.89    7.20
  21   1   5   78.99    8.40
 -22  -2   5   58.99   11.70
 -22  -2   5   58.79    6.30
 -22  -2   5   62.19    6.00
 -22  -2   5   67.39    7.10
 -22   2   5   55.69    7.00
 -20  -2   5  433.96   24.10
 -20  -2   5  389.96   16.10
 -20  -2   5  380.56   16.40
 -20   2   5  408.56   15.40
 -20   2   5  382.16   17.20
 -18  -2   5  404.46   16.90
 -18  -2   5  387.36   22.20
 -18  -2   5  430.26   16.80
 -18  -2   5  400.36   16.20
 -18   2   5  405.26   16.60
 -18   2   5  435.26   15.40
 -16  -2   5 1086.19   33.60
 -16  -2   5 1113.49   33.60
 -16  -2   5 1063.59   33.40
 -16  -2   5 1017.90   39.90
 -16   2   5 1073.69   32.90
 -16   2   5 1103.39   30.70
 -16   2   5 1082.89   32.00
 -16   2   5 1006.30   32.50
 -14  -2   5  760.72   25.30
 -14  -2   5  778.62   25.80
 -14  -2   5  803.12   31.90
 -14  -2   5  791.22   25.60
 -14   2   5  773.12   25.40
 -14   2   5  811.72   24.30
 -14   2   5  812.42   23.40
 -12  -2   5  575.64   20.20
 -12  -2   5  589.54   20.00
 -12  -2   5  562.64   24.40
 -12  -2   5  608.54   20.00
 -12  -2   5  620.94   20.10
 -12   2   5  623.44   18.60
 -12   2   5  602.94   18.80
 -10  -2   5  345.37   16.40
 -10  -2   5  335.07   13.40
 -10  -2   5  323.67   13.00
 -10  -2   5  332.37   12.60
 -10   2   5  340.17   11.50
  -8  -2   5 2740.33   74.19
  -8  -2   5 2703.73   75.79
  -8  -2   5 2693.13   78.29
  -8  -2   5 2752.82   74.89
  -6  -2   5 1722.63   52.19
  -6  -2   5 1776.92   47.90
  -6  -2   5 1730.73   51.49
  -6  -2   5 1785.92   49.99
  -6  -2   5 1777.62   49.50
  -4  -2   5 1365.26   39.00
  -4  -2   5 1398.86   42.40
  -4  -2   5 1377.46   42.00
  -4  -2   5 1387.96   40.00
   4   2  -5 1367.76   39.40
   4   2  -5 1391.86   42.60
  -2  -2   5   84.39    5.40
  -2  -2   5   90.89    7.00
  -2  -2   5   95.19    6.40
  -2   2   5   79.49    4.30
   2   2  -5   92.99    7.30
  -2   2   5   90.29    4.10
   2   2  -5   86.19    5.40
  -2   2   5   86.29    6.90
   0  -2  -5  295.37   11.10
   0  -2  -5  278.37   13.10
   0  -2   5  283.87   11.90
   0  -2   5  298.17   13.90
   0  -2   5  290.77   12.80
   0   2  -5  299.17   14.10
   0   2  -5  288.97   11.90
   0   2   5  292.87   13.80
   0   2   5  289.77    9.80
   0   2   5  301.37   11.70
   2  -2   5  802.82   26.60
   2  -2   5  758.12   27.30
  -2  -2  -5  767.42   24.90
   2  -2   5  743.43   22.90
   2  -2   5  762.12   25.60
  -2   2  -5  797.72   28.20
   2   2   5  762.32   22.50
   2   2   5  790.32   27.60
  -2   2  -5  761.12   25.30
   2   2   5  790.52   24.30
   4  -2   5 2150.18   62.99
   4  -2   5 1904.91   57.19
   4  -2   5 2133.59   61.39
  -4  -2  -5 2168.88   57.69
  -4  -2  -5 1942.11   61.59
   4  -2   5 2168.88   61.69
  -4  -2  -5 2169.98   60.99
  -4   2  -5 2161.78   63.89
   4   2   5 2083.99   57.09
   4   2   5 2174.58   59.59
   4   2   5 2213.98   63.29
  -4   2  -5 2040.60   60.39
   6  -2   5   26.30    5.00
  -6  -2  -5   32.10    4.10
  -6  -2  -5   29.80    5.70
   6  -2   5   38.90    6.20
   6  -2   5   37.30    6.90
   6   2   5   31.30    5.70
   6   2   5   25.40    3.30
   6   2   5   19.50    2.80
  -6   2  -5   27.90    6.50
  -8  -2  -5   67.29    4.90
  -8  -2  -5   87.49    7.40
   8  -2   5   83.29    7.70
   8  -2   5   85.19    7.30
  -8   2  -5   70.99    8.00
   8   2   5   66.59    7.10
   8   2   5   63.39    5.50
  10  -2   5  136.89   10.10
 -10  -2  -5  127.69    9.80
  10  -2   5  123.79    9.60
 -10  -2  -5  120.69    7.10
  10   2   5  116.99    9.60
 -10   2  -5  137.19   11.30
 -12  -2  -5  682.73   27.60
 -12  -2  -5  622.84   22.10
  12  -2   5  610.84   25.80
  12  -2   5  654.13   25.90
  12   2   5  680.03   26.70
 -12   2  -5  661.53   29.10
 -12   2  -5  650.93   22.30
 -14  -2  -5  436.26   21.70
 -14  -2  -5  417.56   16.60
  14  -2   5  369.76   18.70
  14  -2   5  415.36   20.10
 -14   2  -5  400.96   16.20
  14   2   5  436.26   19.90
 -14   2  -5  404.66   22.70
  14   2   5  437.96   20.30
 -16  -2  -5  454.95   23.40
  16  -2   5  418.86   21.20
  16  -2   5  452.15   20.40
 -16  -2  -5  437.06   17.70
 -16   2  -5  439.86   24.60
  16   2   5  456.25   20.50
 -16   2  -5  402.96   17.10
 -18  -2  -5    8.90    5.90
 -18  -2  -5    5.80    2.80
  18  -2   5    5.30    4.80
  18  -2   5    5.00    4.20
 -18   2  -5    5.70    3.10
 -18   2  -5    8.40    5.70
  18   2   5    4.00    4.20
  18   2   5    3.20    3.50
 -20  -2  -5  437.06   25.00
  20  -2   5  417.86   22.30
 -20  -2  -5  395.76   18.00
  20  -2   5  433.86   20.00
 -20   2  -5  389.36   25.40
  20   2   5  397.76   21.30
  20   2   5  435.56   19.90
 -20   2  -5  412.96   18.00
 -23  -3   5  216.48   25.90
 -23  -3   5  272.37   14.10
 -23  -3   5  256.47   14.70
 -23  -3   5  286.37   15.50
 -23   3   5  295.37   14.20
 -23   3   5  261.97   15.40
 -21  -3   5   93.89    8.30
 -21  -3   5   86.99    7.40
 -21  -3   5   76.99    7.10
 -21  -3   5   71.59   12.50
 -21   3   5   75.99    8.60
 -21   3   5   89.69    6.30
 -19  -3   5  207.38   11.20
 -19  -3   5  185.28   10.70
 -19  -3   5  235.48   17.20
 -19   3   5  197.48   11.40
 -19   3   5  225.08    9.80
 -17  -3   5  427.06   22.90
 -17  -3   5  395.76   16.40
 -17  -3   5  396.86   16.90
 -17  -3   5  401.86   16.50
 -17   3   5  415.76   14.60
 -17   3   5  400.86   16.50
 -15  -3   5  173.48    9.50
 -15  -3   5  177.88   14.00
 -15  -3   5  168.28    9.50
 -15  -3   5  173.18    9.30
 -15   3   5  182.68    8.60
 -15   3   5  175.78    7.70
 -13  -3   5  548.05   18.60
 -13  -3   5  528.55   18.90
 -13  -3   5  530.45   19.50
 -13  -3   5  497.25   24.10
 -13  -3   5  551.34   19.70
  13   3  -5  491.85   16.60
 -13   3   5  581.84   16.50
 -13   3   5  543.15   17.00
 -11  -3   5  557.14   24.40
 -11  -3   5  548.45   19.50
 -11  -3   5  532.85   19.50
 -11  -3   5  558.14   19.70
 -11   3   5  576.14   17.10
  -9  -3   5  104.09    6.70
  -9  -3   5  102.89    8.90
  -9  -3   5  117.59    7.40
  -9  -3   5  111.59    6.80
  -9   3   5  110.99    5.00
   9   3  -5  114.49    6.80
  -7  -3   5  836.22   30.70
  -7  -3   5  849.02   27.00
  -7  -3   5  891.11   27.40
  -7  -3   5  869.01   28.50
   7   3  -5  829.62   27.50
  -5  -3   5 1213.88   39.10
  -5  -3   5 1220.28   36.60
  -5  -3   5 1179.78   37.90
  -5  -3   5 1252.07   36.30
  -5  -3   5 1208.88   33.90
   5   3  -5 1162.58   38.30
   5   3  -5 1217.28   40.30
   5   3  -5 1216.88   34.30
  -3  -3   5  517.25   20.20
  -3  -3   5  535.05   20.30
  -3  -3   5  539.25   18.90
  -3  -3   5  542.65   18.20
  -3   3   5  515.85   15.30
  -3   3   5  515.05   16.10
   3   3  -5  505.45   17.10
   3   3  -5  501.05   19.00
   3   3  -5  520.45   22.10
   1  -3  -5  595.84   20.90
  -1  -3   5  598.94   22.80
  -1  -3   5  595.64   22.40
  -1  -3   5  620.84   21.20
  -1  -3   5  632.24   20.30
  -1   3   5  596.54   23.60
   1   3  -5  595.94   20.00
  -1   3   5  622.34   17.80
   1   3  -5  640.14   25.00
   1   3  -5  594.04   21.70
  -1   3   5  599.54   19.00
   1  -3   5  215.58   11.10
   1  -3   5  218.38   10.10
  -1  -3  -5  199.98   11.80
   1  -3   5  196.38   11.40
  -1  -3  -5  205.08    9.10
   1   3   5  206.68    7.50
  -1   3  -5  212.28   12.80
  -1   3  -5  190.48   10.30
   1   3   5  197.68    8.80
  -1   3  -5  208.18    9.60
   1   3   5  205.88   11.90
   3  -3   5  453.25   18.00
   3  -3   5  489.45   19.30
   3  -3   5  476.25   20.00
  -3  -3  -5  492.55   17.80
   3   3   5  477.05   20.20
   3   3   5  466.15   14.90
  -3   3  -5  501.85   21.60
   3   3   5  491.45   17.10
  -3   3  -5  466.85   17.60
  -5  -3  -5 1795.22   49.99
   5  -3   5 1820.62   53.99
  -5  -3  -5 1787.72   53.29
   5  -3   5 1783.12   54.59
   5  -3   5 1792.42   55.49
   5   3   5 1863.81   52.39
   5   3   5 1820.12   55.89
  -5   3  -5 1859.51   58.09
   5   3   5 1714.63   49.30
   7  -3   5  464.45   19.00
  -7  -3  -5  448.66   15.50
   7  -3   5  432.56   20.50
  -7  -3  -5  441.76   18.50
   7  -3   5  425.66   19.40
   7   3   5  438.76   19.80
  -7   3  -5  447.96   21.50
   7   3   5  440.56   17.10
  -9  -3  -5   39.40    6.60
   9  -3   5   35.20    6.10
  -9  -3  -5   36.70    3.90
   9  -3   5   36.30    6.40
  -9   3  -5   45.20    9.30
   9   3   5   50.29    7.10
  11  -3   5  246.98   14.40
  11  -3   5  285.57   15.10
 -11  -3  -5  264.37   14.90
 -11  -3  -5  239.98   11.20
 -11   3  -5  247.78   16.60
  11   3   5  281.97   15.30
 -13  -3  -5  349.17   18.70
  13  -3   5  325.77   17.70
  13  -3   5  357.46   17.80
 -13  -3  -5  351.96   14.50
  13   3   5  351.06   18.00
 -13   3  -5  369.46   21.40
  15  -3   5  661.73   26.80
 -15  -3  -5  593.04   25.10
 -15  -3  -5  717.83   29.90
  15  -3   5  656.23   27.90
  15   3   5  669.73   27.50
 -15   3  -5  648.54   31.30
  17  -3   5  322.37   18.60
 -17  -3  -5  338.47   15.30
 -17  -3  -5  277.37   21.30
  17  -3   5  341.47   17.70
  17   3   5  345.77   17.70
  17   3   5  364.06   19.00
 -17   3  -5  339.07   14.90
 -17   3  -5  331.37   21.90
  19  -3   5    3.80    4.30
  19  -3   5   -1.00    4.10
 -19  -3  -5    3.40    4.10
 -19  -3  -5   -1.20    2.40
  19   3   5    0.00    3.70
  19   3   5    0.30    3.40
 -19   3  -5    2.00    4.80
 -19   3  -5    4.00    3.00
 -21  -3  -5   58.79   11.30
 -21  -3  -5   86.89    7.90
  21  -3   5   64.39   10.20
  21  -3   5   80.19    8.50
  21   3   5   90.99    9.00
  21   3   5   79.09   11.40
 -21   3  -5   73.49   12.90
 -21   3  -5   70.69    7.20
 -22  -4   5   88.39    7.90
 -22  -4   5  102.79    8.40
 -22  -4   5  105.19    9.30
 -22   4   5  105.89    6.60
 -22   4   5   98.89    9.60
 -20  -4   5    3.10    2.50
 -20  -4   5   -1.50    2.30
 -20  -4   5    4.70    6.40
 -20  -4   5   -0.10    2.70
 -20   4   5    4.60    3.70
 -20   4   5   -0.60    1.70
 -18  -4   5   29.70    5.50
 -18  -4   5   19.10    3.90
 -18  -4   5   20.20    7.80
 -18   4   5   31.90    3.40
 -18   4   5   28.70    5.70
 -16  -4   5    0.60    2.20
 -16  -4   5   -1.30    2.10
 -16  -4   5    1.20    2.20
 -16  -4   5    8.80    5.70
 -16   4   5    0.70    2.60
 -16   4   5    2.50    1.50
 -14  -4   5   -0.90    2.20
 -14  -4   5    3.20    2.10
 -14  -4   5    1.80    2.60
 -14  -4   5    2.00    2.20
 -14  -4   5    7.00    4.50
 -14   4   5    1.10    2.10
 -14   4   5   -0.10    1.20
 -14   4   5    0.30    1.90
 -12  -4   5    2.30    2.20
 -12  -4   5   -0.70    1.50
 -12  -4   5    1.00    2.20
 -12  -4   5   -1.10    1.80
 -12  -4   5    4.70    3.50
  12   4  -5    1.20    1.60
 -12   4   5    2.30    1.20
 -12   4   5    0.40    2.30
 -10  -4   5  181.48    9.80
 -10  -4   5  184.78   13.40
 -10  -4   5  202.68   10.60
 -10  -4   5  200.98   10.50
 -10   4   5  214.78    7.30
  -8  -4   5   73.19    6.60
  -8  -4   5   68.39    5.80
  -8  -4   5   68.49    5.70
  -8  -4   5   72.59    7.90
   8   4  -5   67.99    5.40
  -6  -4   5   57.09    5.40
  -6  -4   5   48.40    5.60
  -6  -4   5   52.39    6.40
   6   4  -5   51.99    4.90
  -6   4   5   55.99    3.50
   6   4  -5   57.29    7.50
  -4  -4   5   11.50    3.60
  -4  -4   5   19.90    2.80
  -4  -4   5   11.50    4.10
  -4  -4   5    6.10    3.10
  -4  -4   5   10.60    2.60
   4   4  -5   16.60    5.50
  -4   4   5   14.30    2.50
   4   4  -5   10.90    3.10
   4   4  -5   13.30    2.60
  -4   4   5   14.10    1.50
  -2  -4   5  264.57   10.60
  -2  -4   5  289.57   12.90
  -2  -4   5  276.77   13.70
  -2  -4   5  259.57   11.20
   2  -4  -5  262.07   11.00
  -2  -4   5  266.47   13.50
   2   4  -5  253.57   10.40
   2   4  -5  255.77   15.70
  -2   4   5  252.67    8.40
  -2   4   5  261.97   10.30
   2   4  -5  218.88   11.60
  -2   4   5  271.47   10.20
   0  -4   5  264.17   12.80
   0  -4   5  271.77   11.70
   0  -4   5  259.47   11.30
   0  -4   5  289.37   14.10
   0  -4   5  282.27   14.20
   0  -4  -5  272.57   10.60
   0   4   5  273.67    9.10
   0   4   5  282.87   15.00
   0   4   5  248.18   10.60
   0   4  -5  268.37   11.20
   0   4  -5  302.47   16.90
   0   4   5  275.17   10.90
  -2  -4  -5  391.16   14.40
   2  -4   5  370.06   16.70
  -2  -4  -5  320.27   17.20
   2  -4   5  365.86   15.10
   2  -4   5  348.37   16.80
   2   4   5  360.36   13.90
   2   4   5  380.96   18.00
  -2   4  -5  387.66   19.70
   2   4   5  374.06   11.90
  -2   4  -5  365.56   14.40
   4  -4   5   31.00    5.90
   4  -4   5   29.20    5.70
  -4  -4  -5   23.20    2.70
   4  -4   5   32.40    5.10
  -4   4  -5   23.80    6.00
   4   4   5   32.50    2.60
   4   4   5   34.10    7.00
   4   4   5   32.10    3.60
  -4   4  -5   23.70    4.90
  -6  -4  -5  705.23   21.50
  -6  -4  -5  713.63   24.90
   6  -4   5  674.73   25.20
   6  -4   5  675.43   26.60
   6   4   5  682.93   27.00
   6   4   5  620.74   20.60
  -6   4  -5  711.73   29.70
  -8  -4  -5  325.17   12.30
  -8  -4  -5  316.87   15.20
   8  -4   5  315.07   16.40
   8  -4   5  293.37   15.30
   8   4   5  312.87   16.60
  -8   4  -5  313.27   18.60
  10  -4   5  252.67   14.60
 -10  -4  -5  255.97   11.10
 -10  -4  -5  255.37   14.20
  10  -4   5  231.78   13.90
 -10   4  -5  268.27   17.60
  10   4   5  274.67   15.50
  12  -4   5   52.59    7.50
 -12  -4  -5   55.49    5.30
  12  -4   5   61.59    9.10
 -12  -4  -5   64.19    7.70
 -12   4  -5   59.29   11.50
  12   4   5   49.80    7.60
 -14  -4  -5   40.50    4.80
  14  -4   5   38.10    6.80
 -14  -4  -5   74.49   11.50
  14  -4   5   47.40    8.80
 -14   4  -5   55.59   11.50
  14   4   5   45.20    7.50
 -16  -4  -5    6.70    5.30
 -16  -4  -5   -0.80    1.90
  16  -4   5    2.30    3.80
  16  -4   5    0.20    3.60
  16   4   5    3.10    3.70
 -16   4  -5   -1.10    3.70
 -18  -4  -5  428.16   23.70
 -18  -4  -5  406.86   18.00
  18  -4   5  419.86   20.70
  18  -4   5  402.76   22.10
  18   4   5  464.35   21.40
 -18   4  -5  424.06   26.40
  18   4   5  440.96   21.90
  20  -4   5    3.90    4.60
 -20  -4  -5    4.10    3.00
 -20  -4  -5    1.90    4.50
  20  -4   5    2.20    4.40
  20   4   5    0.40    4.50
 -20   4  -5    3.60    5.90
  20   4   5    2.70    3.80
 -20   4  -5    0.90    2.50
 -21  -5   5   52.09    8.20
 -21  -5   5   58.69    8.30
 -21  -5   5   49.60    6.90
 -21   5   5   57.29    9.40
 -21   5   5   57.99    4.60
 -19  -5   5  199.58   12.00
 -19  -5   5  186.48   17.20
 -19  -5   5  190.68   11.20
 -19  -5   5  205.78   12.70
 -19   5   5  201.48    8.40
 -19   5   5  192.98   12.70
 -17  -5   5  253.17   13.50
 -17  -5   5  249.48   12.70
 -17  -5   5  260.47   19.50
 -17  -5   5  275.07   14.40
 -17   5   5  262.27    9.70
 -17   5   5  276.17   13.80
 -17   5   5  263.07   14.30
 -15  -5   5    4.20    2.90
 -15  -5   5    0.30    2.70
 -15  -5   5    7.20    5.30
 -15  -5   5    6.90    2.90
 -15   5   5    0.50    3.20
 -15   5   5    1.90    1.30
 -15   5   5    0.00    2.20
 -13  -5   5  101.39    7.60
 -13  -5   5   90.99   10.60
 -13  -5   5  104.69    7.10
 -13  -5   5  102.39    8.10
 -13  -5   5  103.19    7.70
 -13   5   5   95.69    8.20
 -13   5   5   99.99    4.50
  13   5  -5   97.09    6.40
 -13   5   5   80.89    6.80
 -11  -5   5  127.59    7.70
 -11  -5   5  145.09    9.40
 -11  -5   5  155.88   12.90
 -11  -5   5  145.59    9.00
 -11  -5   5  161.58    9.60
 -11   5   5  126.69    9.00
  11   5  -5  145.59    8.30
 -11   5   5  124.59    9.00
 -11   5   5  143.19    5.90
  -9  -5   5  462.15   18.80
  -9  -5   5  473.65   23.30
  -9  -5   5  464.35   19.10
  -9  -5   5  480.55   18.30
  -9   5   5  487.15   15.60
  -9   5   5  460.15   14.80
  -9   5   5  492.55   19.80
   9   5  -5  403.06   17.30
  -7  -5   5  333.57   15.10
  -7  -5   5  302.77   13.80
  -7  -5   5  341.77   15.80
  -7  -5   5  331.97   18.20
  -7   5   5  331.77   11.80
   7   5  -5  372.46   20.30
  -7   5   5  348.87   12.30
  -7   5   5  347.57   16.70
  -5  -5   5   33.00    6.30
  -5  -5   5   36.90    4.30
  -5  -5   5   44.80    5.40
  -5  -5   5   34.30    5.60
   5   5  -5   32.40    3.00
  -5   5   5   31.20    3.10
   5   5  -5   54.39   10.00
  -3  -5   5    6.50    2.90
  -3  -5   5   11.10    4.20
  -3  -5   5    9.10    2.90
  -3  -5   5   12.00    3.60
  -3  -5   5    7.40    2.30
  -3   5   5   10.10    2.10
  -3   5   5   11.90    1.30
   3   5  -5    9.30    2.40
   3   5  -5    8.90    5.60
  -1  -5   5  125.89    7.20
   1  -5  -5  118.19    8.30
  -1  -5   5  132.99    9.00
  -1  -5   5  116.09    9.10
  -1  -5   5  122.69    9.20
  -1  -5   5  116.99    7.20
   1  -5  -5  130.59    6.30
  -1   5   5  118.99    6.70
  -1   5   5  123.89    4.80
   1   5  -5  123.79    6.80
   1   5  -5  121.99   11.80
  -1   5   5  102.39    6.10
  -1  -5  -5   46.80    7.80
   1  -5   5   49.00    5.80
   1  -5   5   40.90    6.90
  -1  -5  -5   55.39    4.60
   1  -5   5   48.80    6.00
   1  -5   5   47.50    4.60
   1  -5   5   42.80    4.90
   1   5   5   56.69    8.50
  -1   5  -5   52.89    4.70
   1   5   5   54.79    3.10
   1   5   5   56.99    4.70
  -1   5  -5   61.19   11.00
   3  -5   5   49.00    4.60
   3  -5   5   45.00    5.20
  -3  -5  -5   43.10    4.70
   3  -5   5   31.40    5.70
   3  -5   5   43.90    5.70
  -3  -5  -5   45.70    3.30
   3  -5   5   53.99    6.90
   3   5   5   45.80    4.40
   3   5   5   42.20    2.90
  -3   5  -5   53.39    9.90
   3   5   5   43.90    6.80
   5  -5   5    2.10    2.40
  -5  -5  -5    3.10    2.30
   5  -5   5    2.10    3.70
  -5  -5  -5    2.00    1.60
  -5   5  -5    2.60    4.00
   5   5   5    1.80    1.10
   5   5   5    3.30    3.30
  -7  -5  -5   77.29    6.90
   7  -5   5   76.59    8.20
  -7  -5  -5   72.59    5.00
   7  -5   5   66.39    6.90
   7   5   5   81.49    8.70
   7   5   5   57.09    5.40
  -7   5  -5   64.49   11.20
  -9  -5  -5   -0.70    2.40
   9  -5   5    4.60    3.70
  -9  -5  -5    2.20    1.90
   9  -5   5    5.10    4.30
   9   5   5    3.00    4.00
  -9   5  -5    2.80    4.10
 -11  -5  -5   45.70    7.60
  11  -5   5   40.60    6.60
  11  -5   5   60.59    9.60
 -11  -5  -5   45.70    4.70
 -11   5  -5   44.50   10.40
  11   5   5   43.00    7.90
 -13  -5  -5    9.90    4.20
  13  -5   5    1.80    3.40
 -13  -5  -5    4.70    2.50
  13  -5   5    4.70    4.40
  13   5   5    5.80    4.60
 -13   5  -5    2.80    4.90
 -15  -5  -5   26.40    6.70
  15  -5   5   25.70    6.40
 -15  -5  -5   22.30    4.00
  15  -5   5   16.10    5.50
  15   5   5   31.20    7.30
 -15   5  -5   20.30    7.10
 -17  -5  -5    6.50    5.50
 -17  -5  -5    6.60    3.00
  17  -5   5    4.50    3.80
  17  -5   5   10.10    5.40
  17   5   5    3.30    4.00
 -17   5  -5    6.20    5.30
 -19  -5  -5    1.80    4.20
 -19  -5  -5    0.60    2.70
  19  -5   5   -1.00    3.50
  19  -5   5    0.80    4.40
  19   5   5   -4.00    4.00
 -19   5  -5    0.20    4.40
 -20  -6   5  333.97   17.70
 -20  -6   5  322.07   15.70
 -20  -6   5  338.57   16.80
 -20   6   5  317.07   18.50
 -20   6   5  336.57   11.70
 -18  -6   5  410.76   18.40
 -18  -6   5  373.16   16.90
 -18  -6   5  410.76   19.30
 -18   6   5  360.56   19.30
 -18   6   5  408.56   12.70
 -18   6   5  334.47   17.40
 -16  -6   5  269.87   14.40
 -16  -6   5  314.07   16.00
 -16  -6   5  305.67   14.40
 -16  -6   5  292.97   13.70
 -16   6   5  289.87   16.50
  16   6  -5  275.97   12.40
 -14  -6   5    2.50    3.20
 -14  -6   5    4.70    5.70
 -14  -6   5    1.70    2.80
 -14  -6   5    5.90    2.80
 -14  -6   5    0.90    3.10
 -14   6   5    7.60    4.10
 -12  -6   5   82.09    6.40
 -12  -6   5   75.49    7.20
 -12  -6   5   97.09    8.10
 -12  -6   5   80.89    7.90
 -12  -6   5   88.19   10.50
 -12   6   5   90.89    9.10
 -10  -6   5  796.72   39.80
 -10  -6   5  888.21   31.20
 -10  -6   5  866.31   29.90
 -10  -6   5  921.21   31.60
 -10   6   5  836.72   32.60
 -10   6   5  896.81   25.40
 -10   6   5  871.51   26.70
  -8  -6   5  824.82   29.70
  -8  -6   5  796.52   28.90
  -8  -6   5  766.02   27.50
  -8   6   5  788.42   23.90
   8   6  -5  789.52   35.70
  -8   6   5  830.62   31.90
  -8   6   5  821.32   25.30
  -6  -6   5  286.27   21.30
  -6  -6   5  296.97   15.00
  -6  -6   5  317.47   13.90
  -6  -6   5  296.17   15.50
   6   6  -5  322.57   20.70
  -6   6   5  321.77   17.90
  -6   6   5  309.07   12.30
  -6   6   5  299.77   12.30
  -4  -6   5   86.89    6.60
  -4  -6   5   89.99    8.00
  -4  -6   5   80.49    8.00
  -4  -6   5   93.09    8.80
   4   6  -5   95.89    5.40
  -4   6   5   77.79    9.90
  -4   6   5   92.89    5.90
   4   6  -5   97.49   11.90
  -4   6   5   81.29    5.10
   2  -6  -5   47.80    3.90
  -2  -6   5   53.79    9.00
  -2  -6   5   35.80    6.00
  -2  -6   5   42.20    4.70
  -2  -6   5   41.90    7.10
   2  -6  -5   44.80    5.20
   2   6  -5   66.09   13.00
   2   6  -5   39.90    3.90
  -2   6   5   39.30    4.00
   0  -6  -5  920.71   27.70
   0  -6   5  883.01   28.50
   0  -6   5  868.31   31.70
   0  -6   5  840.82   32.20
   0  -6   5  769.82   31.80
   0  -6   5  936.11   29.40
   0   6   5  876.11   28.40
   0   6  -5  921.31   38.70
   0   6  -5  879.21   27.90
   0   6   5  876.11   24.50
   2  -6   5 1132.79   39.60
   2  -6   5 1150.18   37.60
  -2  -6  -5 1227.38   36.50
  -2  -6  -5 1209.08   33.00
   2  -6   5 1168.08   40.90
   2  -6   5 1177.88   36.20
   2   6   5 1146.49   36.50
   2   6   5 1216.68   42.50
  -2   6  -5 1162.28   46.50
   2   6   5 1155.58   32.60
  -4  -6  -5   99.29    5.10
  -4  -6  -5   92.09    7.10
   4  -6   5   86.39    6.30
   4  -6   5   95.39    8.70
   4  -6   5   99.29    9.30
   4  -6   5   81.89    7.50
   4   6   5   89.49    4.60
   4   6   5   86.29    7.40
   4   6   5   86.99    9.30
  -4   6  -5   86.19   11.10
   6  -6   5   53.19    6.90
  -6  -6  -5   48.60    5.50
   6  -6   5   38.50    6.20
  -6  -6  -5   47.60    3.90
   6  -6   5   44.10    7.20
   6  -6   5   48.50    4.80
  -6   6  -5   49.00   10.80
   6   6   5   50.09    5.90
   6   6   5   54.79    9.20
   8  -6   5  206.08   13.10
  -8  -6  -5  195.98    9.00
   8  -6   5  167.38   12.80
   8  -6   5  209.98    9.90
  -8  -6  -5  204.58   12.00
   8  -6   5  187.78   12.50
   8   6   5  198.68   13.80
  -8   6  -5  192.68   16.50
  10  -6   5  310.47   17.40
  10  -6   5  275.47   12.10
 -10  -6  -5  314.57   16.00
  10  -6   5  265.77   16.00
 -10  -6  -5  285.57   12.10
 -10   6  -5  300.87   20.70
  10   6   5  285.27   17.00
  12  -6   5  680.43   28.70
  12  -6   5  646.24   28.10
 -12  -6  -5  689.33   27.90
 -12  -6  -5  663.73   22.80
 -12   6  -5  659.33   33.60
  12   6   5  631.64   28.00
 -14  -6  -5   94.49    7.10
  14  -6   5   87.09   10.00
 -14  -6  -5   95.59    9.80
  14  -6   5  104.29   10.50
  14   6   5   79.19    9.60
 -14   6  -5  120.29   14.10
  16  -6   5    1.50    2.80
  16  -6   5    8.30    5.00
 -16  -6  -5    6.40    4.20
 -16  -6  -5    3.20    2.50
 -16   6  -5    0.00    4.60
  16   6   5    8.50    5.50
 -18  -6  -5  283.27   13.80
  18  -6   5  244.98   16.50
  18  -6   5  241.88   17.80
 -18  -6  -5  268.07   18.20
  18   6   5  276.97   17.20
 -18   6  -5  273.47   22.20
 -19  -7   5  280.97   15.80
 -19  -7   5  313.97   17.50
 -19  -7   5  288.37   14.80
 -19   7   5  312.57   19.50
 -17  -7   5  257.17   15.10
 -17  -7   5  228.78   13.70
 -17  -7   5  214.98   12.20
 -15  -7   5   82.09    6.90
 -15  -7   5   82.59    8.00
 -15  -7   5   85.39    8.10
 -15  -7   5   81.79    8.70
 -15   7   5   94.49   10.70
 -13  -7   5   -1.30    2.90
 -13  -7   5    6.10    3.40
 -13  -7   5    1.40    2.70
 -13  -7   5    0.30    2.90
 -13   7   5    1.00    3.90
 -11  -7   5  285.57   13.10
 -11  -7   5  272.37   14.40
 -11  -7   5  307.07   16.10
 -11  -7   5  298.37   15.80
 -11   7   5  319.77   18.70
  -9  -7   5  257.97   13.40
  -9  -7   5  253.67   14.80
  -9  -7   5  248.58   14.30
  -9   7   5  280.47   10.00
   9   7  -5  245.68   19.70
  -9   7   5  256.97   17.20
  -9   7   5  281.47   11.80
  -7  -7   5  477.85   21.30
  -7  -7   5  436.06   18.50
  -7  -7   5  435.86   20.10
  -7   7   5  466.75   24.10
  -7   7   5  448.96   16.90
   7   7  -5  467.35   27.30
  -7   7   5  460.85   15.40
  -5  -7   5  308.67   14.50
  -5  -7   5  349.57   17.00
  -5  -7   5  341.37   17.50
   5  -7  -5  294.77   12.40
  -5   7   5  274.27   11.70
   5   7  -5  347.47   12.10
   5   7  -5  327.07   22.20
  -5   7   5  335.17   20.70
  -5   7   5  345.37   13.70
  -3  -7   5  124.79    9.80
  -3  -7   5  122.39    8.20
  -3  -7   5  106.89    9.80
   3  -7  -5  127.89    6.70
   3   7  -5  125.09    6.80
  -3   7   5  114.79   13.00
   3   7  -5  124.19   14.10
  -3   7   5  119.99    7.50
  -1  -7   5  245.98   14.20
   1  -7  -5  247.88   10.80
  -1  -7   5  215.68   14.20
  -1  -7   5  253.07   12.00
   1   7  -5  268.67   20.20
  -1   7   5  246.38   11.60
   1   7  -5  230.18   10.70
   1  -7   5 1040.60   32.80
   1  -7   5  947.01   37.00
   1  -7   5 1065.19   37.10
  -1  -7  -5 1039.60   32.40
  -1   7  -5  992.60   44.10
   1   7   5 1009.80   28.20
   1   7   5 1022.80   33.00
   3  -7   5  635.74   27.70
  -3  -7  -5  696.43   23.90
  -3  -7  -5  664.13   19.90
   3  -7   5  641.64   22.80
   3  -7   5  644.04   26.90
   3   7   5  662.43   19.50
   3   7   5  621.64   23.60
   3   7   5  684.83   29.20
  -3   7  -5  678.43   34.10
   5  -7   5  666.53   26.40
  -5  -7  -5  710.33   21.10
   5  -7   5  697.63   23.40
   5  -7   5  657.23   28.60
  -5  -7  -5  695.63   25.20
   5  -7   5  674.43   27.90
  -5   7  -5  641.44   33.80
   5   7   5  687.33   29.50
   5   7   5  646.84   20.40
   7  -7   5  387.76   20.70
   7  -7   5  423.06   16.10
  -7  -7  -5  424.96   18.60
  -7  -7  -5  409.36   14.50
   7  -7   5  390.66   19.40
   7  -7   5  394.56   20.20
   7   7   5  387.26   20.90
  -7   7  -5  399.96   25.50
   9  -7   5  107.99   10.80
   9  -7   5  112.99   10.40
   9  -7   5  126.69    7.50
  -9  -7  -5  111.99    6.80
  -9  -7  -5  117.69    9.70
   9  -7   5  103.59   10.00
   9   7   5  108.89   11.00
  -9   7  -5  105.09   13.90
  11  -7   5  500.65   23.90
  11  -7   5  508.05   18.30
  11  -7   5  482.85   26.50
  11  -7   5  511.65   24.10
 -11  -7  -5  488.05   18.00
 -11  -7  -5  483.15   22.50
  11   7   5  456.55   28.40
 -11   7  -5  509.75   29.90
  13  -7   5  757.02   32.20
 -13  -7  -5  767.32   31.50
  13  -7   5  716.73   32.10
  13  -7   5  768.92   32.60
  13  -7   5  789.32   25.50
 -13   7  -5  784.32   39.40
  13   7   5  839.92   33.10
  15  -7   5  195.78   15.70
  15  -7   5  218.58   15.70
  15  -7   5  239.98   16.20
 -15  -7  -5  231.08   11.80
  15  -7   5  245.48   10.80
 -15  -7  -5  208.08   15.20
 -15   7  -5  221.18   20.40
  15   7   5  251.97   16.30
 -17  -7  -5   79.39   10.10
 -17  -7  -5   94.39    7.80
  17  -7   5   92.19   10.60
  17  -7   5   76.79   11.80
  17  -7   5   79.79   10.30
  17  -7   5   95.39    6.30
  17   7   5   83.69   10.00
 -17   7  -5   50.29   11.50
 -18  -8   5  221.28   12.70
 -18  -8   5  238.78   15.40
 -18  -8   5  219.98   14.00
 -18   8   5  244.58   18.10
 -16  -8   5   11.40    3.80
 -16  -8   5    7.00    3.50
 -16  -8   5   12.30    5.10
 -16   8   5   10.80    6.10
 -14  -8   5   12.60    5.00
 -14  -8   5    9.10    3.90
 -14  -8   5   17.80    5.40
 -14  -8   5    4.60    4.00
 -14   8   5   13.20    7.20
 -12  -8   5    2.50    2.80
 -12  -8   5    3.60    4.00
 -12  -8   5    0.80    3.40
 -12  -8   5    2.90    3.10
 -12   8   5    3.90    5.10
 -10  -8   5   51.89    7.70
 -10  -8   5   55.09    8.60
 -10  -8   5   42.00    7.80
 -10   8   5   44.70    3.50
 -10   8   5   64.49   12.90
 -10   8   5   51.09    5.00
  -8  -8   5  112.39   11.10
  -8  -8   5  101.19   10.20
  -8  -8   5  105.89   10.20
  -8   8   5  108.59    7.30
  -8   8   5  114.59    6.00
  -8   8   5  103.79   12.80
   8   8  -5   92.99   16.40
  -6  -8   5  391.86   20.20
  -6  -8   5  418.06   19.80
  -6  -8   5  421.86   17.90
   6   8  -5  368.76   25.60
  -6   8   5  365.66   23.40
  -6   8   5  398.36   16.20
   6   8  -5  381.56   13.70
  -4  -8   5   20.10    4.60
  -4  -8   5   21.40    6.30
  -4  -8   5   16.50    5.30
   4  -8  -5   29.60    4.20
  -4   8   5   20.30    8.70
  -4   8   5   22.20    4.30
   4   8  -5   19.50    8.20
  -2  -8   5  124.69   10.50
  -2  -8   5  141.09   11.80
   2  -8  -5  138.59    7.60
  -2  -8   5  131.19    8.90
  -2   8   5  161.78   16.10
  -2   8   5  127.99    8.30
   2   8  -5  117.09    7.20
   2   8  -5   94.39   16.20
   0  -8   5  202.68   14.40
   0  -8   5  207.48   14.00
   0  -8  -5  221.18   11.20
   0  -8   5  210.58   11.30
   0   8  -5  253.57   21.30
   2  -8   5  566.84   21.40
   2  -8   5  536.25   25.90
  -2  -8  -5  598.84   22.00
  -2  -8  -5  611.74   17.60
   2  -8   5  613.44   26.10
  -2   8  -5  601.24   33.70
   2   8   5  584.24   17.20
   2   8   5  552.64   22.10
  -4  -8  -5  303.17   10.80
   4  -8   5  313.27   18.30
   4  -8   5  304.97   17.50
   4  -8   5  287.67   13.40
  -4  -8  -5  308.57   14.60
  -4   8  -5  304.87   23.60
   4   8   5  297.67   10.40
   4   8   5  283.77   18.40
   6  -8   5  215.78   16.90
  -6  -8  -5  206.68   12.10
   6  -8   5  201.88   10.50
   6  -8   5  191.78   13.90
  -6  -8  -5  204.28    8.70
  -6   8  -5  178.38   18.30
   6   8   5  188.28   14.60
  -8  -8  -5   12.70    5.10
   8  -8   5    3.30    2.60
  -8  -8  -5    1.90    1.90
   8  -8   5    7.40    5.00
   8  -8   5    3.40    3.60
   8   8   5    2.80    5.70
  -8   8  -5    7.10    7.20
 -10  -8  -5  706.23   28.60
  10  -8   5  713.53   31.30
  10  -8   5  734.93   24.30
 -10  -8  -5  687.33   23.30
  10  -8   5  671.53   31.50
  10   8   5  685.13   30.60
 -10   8  -5  730.03   39.10
 -12  -8  -5  224.58   14.80
  12  -8   5  229.58   16.50
 -12  -8  -5  216.98   10.80
  12  -8   5  234.28   10.80
  12  -8   5  215.78   15.80
  12   8   5  192.78   15.20
 -12   8  -5  214.08   20.30
  14  -8   5  139.69   13.10
 -14  -8  -5  167.08    9.60
  14  -8   5  175.98    9.00
  14  -8   5  145.19   13.50
 -14  -8  -5  183.58   13.90
  14   8   5  153.28   13.50
 -14   8  -5  173.78   19.10
  16  -8   5   15.00    2.80
  16  -8   5   16.00    7.00
 -16  -8  -5   20.00    7.10
  16  -8   5   23.50    7.60
 -16  -8  -5   13.20    3.70
 -16   8  -5    0.10    6.90
  16   8   5   17.50    6.60
 -15  -9   5    8.60    4.60
 -15  -9   5   13.50    5.40
 -15  -9   5   15.10    5.30
 -15  -9   5   19.00    4.70
 -15   9   5   20.80    8.50
 -13  -9   5   -0.60    2.40
 -13  -9   5   -1.70    2.00
 -13  -9   5    6.00    4.60
 -13  -9   5   -3.10    3.70
 -13   9   5    7.20    7.30
 -11  -9   5   -1.20    2.90
 -11  -9   5   -0.90    2.10
 -11  -9   5   -0.70    3.90
 -11  -9   5    0.70    3.10
 -11   9   5    0.80    6.30
  -9  -9   5   41.00    7.90
  -9  -9   5   36.00    5.90
  -9  -9   5   46.40    5.30
  -9  -9   5   42.00    8.60
  -9   9   5   46.30    3.70
  -9   9   5   41.60    5.10
   9   9  -5   38.80   12.10
  -9   9   5   41.60   11.00
  -7  -9   5   10.90    3.90
  -7  -9   5   13.30    4.80
  -7  -9   5   15.80    6.10
   7   9  -5   21.50    9.10
   7   9  -5   19.90    3.10
  -7   9   5   20.60    5.10
  -7   9   5   18.00    7.90
  -5  -9   5  104.59    9.70
  -5  -9   5  120.89   10.80
   5  -9  -5  114.49    6.80
  -5  -9   5  110.89   11.20
   5   9  -5  117.79    6.80
   5   9  -5  132.99   17.00
  -5   9   5  112.29   14.20
  -5   9   5  124.49    8.50
  -3  -9   5   15.40    5.90
  -3  -9   5   14.60    4.50
   3  -9  -5   19.40    3.80
   3   9  -5   12.80    7.90
  -3   9   5   13.90    7.90
  -1  -9   5   59.59    8.00
  -1   9   5   41.90    5.20
   1   9  -5   62.99   13.80
  -1  -9  -5    9.40    3.40
   1  -9   5    3.00    3.00
   1  -9   5    9.50    5.80
  -1   9  -5   13.40    7.80
  -3  -9  -5   -0.40    1.20
  -3  -9  -5    3.60    2.80
   3  -9   5   -1.60    3.40
   3  -9   5    2.60    3.10
   3   9   5    5.60    4.70
  -3   9  -5    5.70    6.70
   3   9   5    2.30    1.30
   5  -9   5   74.29    6.80
   5  -9   5   65.59   10.90
  -5  -9  -5   73.29    7.40
   5  -9   5   58.69    9.70
  -5  -9  -5   68.69    4.50
   5   9   5   67.79    4.30
  -5   9  -5   57.99   13.40
   5   9   5   74.99   12.40
  -7  -9  -5    8.20    3.90
  -7  -9  -5    1.30    1.70
   7  -9   5    1.90    2.70
   7  -9   5    1.10    3.50
   7  -9   5    5.70    4.50
   7   9   5    1.30    4.20
  -7   9  -5   -3.50   10.70
  -9  -9  -5  160.08    8.50
   9  -9   5  172.28   14.20
   9  -9   5  169.88   14.70
   9  -9   5  171.78    9.80
  -9  -9  -5  180.58   12.60
  -9   9  -5  157.38   19.10
   9   9   5  191.48   15.00
  11  -9   5   12.00    3.60
  11  -9   5    3.90    4.80
  11  -9   5    6.90    5.20
 -11  -9  -5    8.80    4.50
 -11  -9  -5    7.10    3.00
 -11   9  -5    4.20    6.60
  11   9   5    7.40    6.00
  13  -9   5   30.40    4.70
 -13  -9  -5   24.00    4.30
  13  -9   5   20.60    8.10
  13  -9   5   26.20    8.00
 -13  -9  -5   16.60    5.90
  13   9   5   30.50    7.40
 -13   9  -5   11.90    8.30
 -14 -10   5   32.20    7.70
 -14 -10   5   17.10    5.30
 -14 -10   5   23.50    5.20
 -14 -10   5   33.30    8.20
 -14  10   5   18.80    9.20
 -12 -10   5   63.09    6.60
 -12 -10   5   59.39    9.30
 -12 -10   5   59.89   10.70
 -12 -10   5   66.49   11.20
 -12  10   5   60.69   13.70
 -10 -10   5   18.40    4.10
 -10 -10   5   14.20    4.60
 -10 -10   5   20.10    7.00
 -10 -10   5   25.70    7.40
  10  10  -5   25.30   12.10
 -10  10   5   10.00    2.20
 -10  10   5   21.60    9.20
 -10  10   5    8.10    3.20
  -8 -10   5   -0.40    4.40
  -8 -10   5    1.30    2.20
   8 -10  -5    0.90    1.90
  -8 -10   5   -0.10    2.90
  -8 -10   5   -1.40    3.70
  -8  10   5   12.00    8.90
   8  10  -5    4.30    7.20
   6 -10  -5  349.37   14.00
  -6 -10   5  391.86   21.60
  -6 -10   5  338.77   19.50
  -6 -10   5  362.66   17.60
   6  10  -5  339.97   13.60
  -6  10   5  367.96   26.20
  -6  10   5  350.86   16.30
   6  10  -5  375.16   28.80
  -4 -10   5   21.10    6.10
   4 -10  -5   22.30    4.10
  -4 -10   5   15.90    5.00
  -4 -10   5   26.50    7.10
  -4  10   5   21.20    4.70
   4  10  -5   26.00   11.40
  -4  10   5   14.00    8.20
  -2 -10   5   82.09   10.40
  -2 -10   5   91.19   10.10
   2 -10  -5   88.99    7.10
  -2 -10   5   83.19    7.90
   2  10  -5   70.59   16.30
  -2  10   5  101.99   17.80
   0 -10   5   69.09    7.50
   0 -10   5   45.00    8.90
   0 -10   5   48.80    9.20
   0 -10  -5   61.99    6.40
   0  10  -5   65.49   16.50
  -2 -10  -5   95.29    7.90
   2 -10   5   84.29    9.90
   2 -10   5  104.19   10.30
   2 -10   5   85.19   10.80
  -2  10  -5   76.89   16.20
   4 -10   5  203.88   11.70
   4 -10   5  195.88   16.20
  -4 -10  -5  204.38    8.10
  -4 -10  -5  217.48   12.70
   4 -10   5  211.88   15.60
   4  10   5  221.68   17.30
   6 -10   5  460.65   18.80
  -6 -10  -5  427.36   20.40
   6 -10   5  415.46   24.40
  -6 -10  -5  469.05   15.40
   6 -10   5  438.46   23.50
   6  10   5  466.75   25.30
   8 -10   5   -1.70    3.90
   8 -10   5    1.40    2.80
  -8 -10  -5    4.00    2.20
  -8 -10  -5    4.10    3.70
   8 -10   5    3.50    5.10
   8  10   5    0.80    4.00
  -8  10  -5    2.30    7.10
 -10 -10  -5  160.18   12.30
 -10 -10  -5  143.19    8.20
  10 -10   5  152.98   14.50
  10 -10   5  154.58    9.40
  10 -10   5  124.69   12.80
 -10  10  -5  133.59   22.10
  10  10   5  141.69   13.90
  12 -10   5   63.69   12.80
 -12 -10  -5   66.49   10.00
  12 -10   5   63.99    6.20
  12 -10   5   56.69   11.00
 -12 -10  -5   60.79    5.60
  12  10   5   51.89    9.50
 -12  10  -5   48.00   13.40
 -11 -11   5   97.09   11.90
 -11 -11   5   98.09    8.10
 -11 -11   5   79.69   10.10
 -11 -11   5  109.49   10.10
 -11  11   5  107.69   18.20
   9 -11  -5  103.49    9.50
  -9 -11   5  140.99    9.20
  -9 -11   5  135.39   12.60
  -9 -11   5  135.89   13.30
  -9 -11   5  130.89   10.90
  -9  11   5  137.69   17.30
   9  11  -5  164.08   21.40
  -9  11   5  109.99   10.40
   7 -11  -5   43.70    4.60
  -7 -11   5   40.60    5.70
  -7 -11   5   37.00    7.30
  -7 -11   5   45.70    9.50
  -7 -11   5   51.29    9.70
   7  11  -5   33.40   11.30
  -7  11   5   44.80   12.70
  -5 -11   5   37.10    6.40
  -5 -11   5   27.00    7.30
  -5 -11   5   40.50    9.60
   5 -11  -5   49.90    5.00
   5  11  -5   29.00   13.60
  -5  11   5   53.59   14.50
  -3 -11   5  332.47   20.20
  -3 -11   5  345.37   21.90
  -3 -11   5  361.26   17.60
   3 -11  -5  351.06   15.50
  -3  11   5  327.17   27.40
   3  11  -5  362.86   30.00
  -1 -11   5  181.68   14.70
  -1 -11   5  186.48   12.20
   1 -11  -5  196.48   11.30
   1 -11   5  162.58   11.20
   1 -11   5  162.48   14.10
  -1 -11  -5  189.58   11.40
   1 -11   5  169.38   15.50
  -1  11  -5  116.89   20.50
   3 -11   5  204.18   16.00
   3 -11   5  223.88   12.80
  -3 -11  -5  249.48   14.00
   3 -11   5  205.48   17.20
  -3  11  -5  202.68   23.40
  -5 -11  -5  265.17    9.70
   5 -11   5  223.68   18.30
  -5 -11  -5  275.07   15.50
   5 -11   5  265.27   13.80
   5 -11   5  242.98   17.60
  -5  11  -5  282.67   26.90
   5  11   5  210.68   18.00
   7 -11   5  337.27   22.70
   7 -11   5  365.96   16.80
  -7 -11  -5  362.76   13.40
  -7 -11  -5  397.96   19.60
   7 -11   5  387.76   22.50
   7  11   5  349.17   22.80
   9 -11   5  242.28   18.20
  -9 -11  -5  313.07   17.80
   9 -11   5  306.87   21.30
  -9 -11  -5  284.77   11.80
  -9  11  -5  276.67   27.50
   9  11   5  286.57   20.10
  -6 -12   5   83.49    7.20
  -6 -12   5   83.09   14.00
  -6 -12   5   70.29   12.20
  -6 -12   5   67.29   10.10
  -6  12   5   61.59   16.50
   6  12  -5  110.19   22.50
  -4 -12   5  215.68   18.00
   4 -12  -5  230.18   11.90
  -4 -12   5  219.18   13.90
  -4 -12   5  209.08   16.20
  -4  12   5  195.88   22.80
   4  12  -5  224.18   26.00
  -2 -12   5   91.29   11.30
  -2 -12   5  107.29    9.60
  -2 -12   5   99.59   12.70
   2 -12  -5  102.69    8.30
  -2  12   5   73.09   17.00
   2  12  -5   81.99   18.00
   0 -12  -5    3.70    3.10
   0 -12   5   -0.60    4.60
   0 -12   5   -0.40    4.00
   0 -12   5   -3.00    2.90
   0  12  -5   -7.50    8.50
   2 -12   5  260.77   19.90
  -2 -12  -5  288.37   15.60
   2 -12   5  264.17   14.80
   2 -12   5  258.77   18.50
  -2  12  -5  260.97   27.80
  -4 -12  -5  221.88   14.00
   4 -12   5  210.38   18.00
   4  12   5  195.98   17.90
  -4  12  -5  197.58   24.90
 -22   0   6  882.11   29.90
 -22   0   6  887.71   30.80
 -22   0   6  848.82   36.60
 -22   0   6  934.31   28.30
 -20   0   6  584.44   21.60
 -20   0   6  612.74   21.70
 -20   0   6  611.44   20.50
 -20   0   6  557.64   26.40
 -18   0   6  515.25   18.70
 -18   0   6  525.75   23.60
 -18   0   6  554.64   19.60
 -18   0   6  529.05   18.60
 -16   0   6  242.08   10.80
 -16   0   6  260.37   11.30
 -16   0   6  261.17   14.00
 -14   0   6   84.09    5.60
 -14   0   6   82.19    5.60
 -14   0   6   76.19    5.60
 -12   0   6  203.28    9.70
 -12   0   6  205.58    9.90
 -12   0   6  195.18    9.00
 -12   0   6  208.68    9.30
 -10   0   6 3366.66   92.29
 -10   0   6 3358.26   93.49
 -10   0   6 3434.46   91.89
  -8   0   6   99.49    6.60
  -8   0   6  112.99    7.70
  -6   0   6    0.30    1.90
  -6   0   6    1.10    2.50
  -4   0   6   27.60    4.70
  -4   0   6   24.50    2.90
  -4   0   6   22.10    4.60
  -2   0   6  559.54   21.70
  -2   0   6  538.45   18.50
  -2   0   6  547.25   20.30
   0   0  -6 1526.55   47.30
   0   0   6 1477.85   43.50
   0   0   6 1600.44   46.00
   0   0   6 1565.94   49.20
   0   0   6 1620.64   48.00
   0   0  -6 1663.53   46.90
   2   0   6 1564.94   49.10
   2   0   6 1615.04   46.10
  -2   0  -6 1635.24   47.50
  -2   0  -6 1366.66   46.50
   2   0   6 1568.04   47.80
   4   0   6  292.57   15.70
   4   0   6  359.16   14.30
   4   0   6  333.97   15.60
   6   0   6  511.85   21.60
   6   0   6  477.55   20.50
  -6   0  -6  478.35   20.90
  -8   0  -6 1522.35   49.00
   8   0   6 1448.85   48.10
   8   0   6 1452.05   47.60
  10   0   6 1233.88   42.30
 -10   0  -6 1221.38   37.50
 -10   0  -6 1277.17   44.20
  10   0   6 1216.78   42.10
 -12   0  -6  682.43   29.60
  12   0   6  666.03   27.50
 -12   0  -6  664.33   23.20
  12   0   6  667.63   27.70
  14   0   6  286.77   18.90
 -14   0  -6  287.47   13.50
 -14   0  -6  315.47   19.20
  14   0   6  321.77   17.10
 -16   0  -6   24.40    7.20
 -16   0  -6   34.80    5.40
  16   0   6   32.40    6.90
  16   0   6   34.90    7.40
  18   0   6 1554.74   51.59
 -18   0  -6 1478.55   56.79
  18   0   6 1556.74   53.39
 -18   0  -6 1491.95   47.40
 -20   0  -6  495.45   20.90
 -20   0  -6  480.55   28.30
  20   0   6  523.45   25.60
 -23  -1   6  174.58    9.50
 -23  -1   6  157.88   10.60
 -23  -1   6  185.88   10.80
 -23  -1   6  172.58   15.50
 -23   1   6  157.38   10.60
 -23   1   6  173.18    9.90
 -21  -1   6  192.88   10.90
 -21  -1   6  206.68   15.50
 -21  -1   6  208.98   10.60
 -21  -1   6  189.98   10.90
 -21   1   6  193.08   10.30
 -21   1   6  199.68   11.00
 -21   1   6  193.48    9.20
 -21   1   6  210.08    9.10
 -19  -1   6  212.48   18.50
 -19  -1   6  208.48   10.90
 -19  -1   6  217.38   10.50
 -19  -1   6  212.48   10.70
 -19   1   6  228.68    9.50
 -19   1   6  198.08   10.20
 -19   1   6  207.78   10.30
 -19   1   6  194.68    9.30
 -17  -1   6  261.77   12.10
 -17  -1   6  269.17   11.60
 -17  -1   6  256.87   15.70
 -17  -1   6  262.47   11.90
 -17   1   6  273.17   11.60
 -17   1   6  265.27   10.80
 -15  -1   6  237.98   14.10
 -15  -1   6  252.07   11.20
 -15  -1   6  234.48   10.10
 -15  -1   6  241.28   11.10
 -15   1   6  245.78   10.20
 -15   1   6  265.47   10.80
 -15   1   6  266.17   10.60
 -15   1   6  238.18   10.40
 -13  -1   6  164.68   10.40
 -13  -1   6  153.38    8.20
 -13  -1   6  141.09    6.90
 -13  -1   6  145.09    7.80
 -13  -1   6  151.18    8.20
 -13   1   6  141.39    7.30
 -13   1   6  158.88    8.30
 -13   1   6  143.29    7.30
 -11  -1   6  218.38    8.70
 -11  -1   6  213.58   10.50
 -11  -1   6  206.88    9.80
 -11   1   6  221.08   10.70
 -11   1   6  211.48    9.20
  -9  -1   6  461.15   18.20
  -9  -1   6  466.35   17.80
  -9  -1   6  467.15   15.80
  -9  -1   6  486.85   17.10
  -9   1   6  483.85   18.60
  -7  -1   6  407.46   15.40
  -7  -1   6  409.16   16.60
  -7  -1   6  388.16   14.80
  -7  -1   6  400.06   13.60
  -7   1   6  389.56   16.30
  -5  -1   6  223.08   10.00
  -5  -1   6  236.38   10.20
  -5  -1   6  195.88   11.40
  -5   1   6  236.08   11.70
  -3  -1   6   21.70    4.50
  -3  -1   6   19.00    3.60
  -3  -1   6   19.90    3.70
  -3   1   6   15.50    4.00
  -3   1   6   19.50    3.00
  -1  -1   6  204.28    9.90
  -1  -1   6  198.28   10.20
  -1  -1   6  197.98   11.50
  -1   1   6  194.08   11.10
  -1   1   6  195.28    7.70
  -1   1   6  207.08    8.80
   1   1  -6  194.18   10.20
   1   1  -6  206.48   10.70
  -1  -1  -6  788.72   25.70
   1  -1   6  789.32   28.50
   1  -1   6  782.72   26.20
   1  -1   6  768.32   26.60
  -1   1  -6  822.32   27.80
   1   1   6  776.42   24.90
   1   1   6  744.53   23.00
  -1   1  -6  741.13   26.10
   1   1   6  794.32   28.00
   3  -1   6  805.92   27.20
   3  -1   6  808.52   28.00
  -3  -1  -6  789.82   27.40
   3  -1   6  803.22   29.50
  -3   1  -6  779.02   28.70
   3   1   6  809.42   29.10
   3   1   6  806.82   26.20
   5  -1   6   74.99    7.70
   5  -1   6   81.99    6.40
  -5  -1  -6   79.99    7.30
   5  -1   6   72.79    7.10
   5   1   6   77.49    5.80
   5   1   6   81.19    7.70
  -5   1  -6   75.59    7.60
   7  -1   6   72.99    7.40
  -7  -1  -6   73.59    7.30
   7  -1   6   62.29    5.70
   7  -1   6   72.49    7.70
  -7   1  -6   64.69    7.40
   7   1   6   57.49    7.00
   7   1   6   57.99    5.40
   7   1   6   73.79    7.80
  -9  -1  -6  291.37   16.00
   9  -1   6  276.97   15.20
  -9  -1  -6  285.47   12.00
   9  -1   6  266.17   15.20
   9   1   6  272.67   15.50
   9   1   6  270.87   15.30
  -9   1  -6  283.57   16.40
 -11  -1  -6  940.51   30.00
  11  -1   6  922.71   34.40
 -11  -1  -6  926.91   35.80
  11  -1   6  946.01   34.60
 -11   1  -6  949.11   37.10
  11   1   6  939.11   34.60
  11   1   6  925.41   34.60
 -13  -1  -6  577.44   27.20
 -13  -1  -6  609.44   21.80
  13  -1   6  616.14   25.80
  13  -1   6  558.44   25.50
  13   1   6  544.35   25.30
 -13   1  -6  610.74   28.50
 -13   1  -6  606.64   22.00
  13   1   6  624.84   25.80
 -15  -1  -6  113.49   11.80
  15  -1   6  111.69   10.40
  15  -1   6  100.39   10.20
 -15  -1  -6  102.39    7.70
 -15   1  -6  106.39   11.80
  15   1   6  110.29   10.30
 -15   1  -6  106.99    7.80
  15   1   6  124.49   11.20
  17  -1   6    4.00    4.30
 -17  -1  -6    3.10    2.70
  17  -1   6    8.70    5.40
 -17  -1  -6    5.30    5.00
 -17   1  -6   11.20    4.00
  17   1   6   11.80    5.00
  17   1   6   12.30    5.70
 -17   1  -6   13.80    7.90
  19  -1   6  317.57   18.20
  19  -1   6  359.06   20.40
 -19  -1  -6  330.47   22.10
 -19  -1  -6  342.07   16.10
  19   1   6  315.37   19.10
  19   1   6  325.27   18.10
 -19   1  -6  353.86   23.40
 -19   1  -6  316.57   15.40
 -22  -2   6  106.29    8.30
 -22  -2   6  100.99    8.30
 -22  -2   6  113.19    8.00
 -22  -2   6   97.39   12.80
 -22   2   6  111.79    7.50
 -22   2   6   98.89    8.60
 -20  -2   6    9.20    5.90
 -20  -2   6    2.30    2.60
 -20  -2   6    8.10    3.90
 -20  -2   6    3.50    2.70
 -20   2   6    6.60    2.80
 -18  -2   6   72.79    9.00
 -18  -2   6   74.49    6.40
 -18  -2   6   71.29    6.30
 -18  -2   6   80.19    6.50
 -18   2   6   79.79    5.80
 -18   2   6   72.19    4.60
 -16  -2   6    0.10    1.70
 -16  -2   6   -1.90    2.00
 -16  -2   6    0.90    1.90
 -16   2   6   -0.60    1.40
 -16   2   6    0.10    1.80
 -16   2   6    2.30    2.00
 -14  -2   6    1.50    2.40
 -14  -2   6    1.90    2.40
 -14  -2   6    1.20    3.20
 -14  -2   6    5.70    2.70
 -14  -2   6    2.90    2.00
 -14   2   6    5.00    2.20
 -14   2   6    4.40    2.00
 -14   2   6    5.20    1.80
 -12  -2   6   38.10    4.00
 -12  -2   6   39.40    5.30
 -12  -2   6   37.90    7.40
 -12  -2   6   40.50    4.60
 -12   2   6   39.10    3.50
 -12   2   6   35.30    3.40
 -10  -2   6   52.49    4.40
 -10  -2   6   47.30    7.30
 -10  -2   6   48.20    4.80
 -10  -2   6   60.89    5.60
  -8  -2   6  589.74   19.60
  -8  -2   6  599.14   21.90
  -8  -2   6  586.24   22.10
  -8  -2   6  586.24   20.50
  -6  -2   6  175.48    8.50
  -6  -2   6  182.68    9.70
  -6  -2   6  162.58    8.80
  -6  -2   6  178.38   10.40
  -6  -2   6  173.58    8.80
  -6   2   6  171.08   10.60
  -4  -2   6   12.70    4.00
  -4  -2   6    9.10    2.70
  -4  -2   6   11.30    2.80
  -4  -2   6   11.10    3.10
  -4   2   6   12.40    2.10
  -4   2   6    5.80    3.30
  -2  -2   6   36.70    4.20
  -2  -2   6   40.20    4.40
  -2  -2   6   40.10    6.30
  -2   2   6   53.99    7.80
   2   2  -6   39.90    4.20
  -2   2   6   44.30    3.00
  -2   2   6   38.00    3.20
   2   2  -6   50.49    6.00
   0  -2   6  120.19    9.10
   0  -2   6  125.09    7.70
   0  -2  -6  123.29    6.70
   0  -2   6  132.99    8.20
   0  -2  -6  112.29    8.00
   0   2  -6  118.49    9.20
   0   2  -6  108.09    7.80
   0   2   6  121.99    5.50
   0   2   6  112.89    6.20
   0   2   6  123.79    9.10
  -2  -2  -6   39.00    5.40
   2  -2   6   25.50    5.70
   2  -2   6   33.00    4.90
   2  -2   6   31.10    4.10
   2   2   6   27.00    2.60
  -2   2  -6   27.90    5.70
   2   2   6   30.00    6.50
   2   2   6   24.30    3.00
  -2   2  -6   30.60    4.50
   4  -2   6  697.13   26.50
  -4  -2  -6  690.53   24.40
   4  -2   6  674.53   24.50
   4  -2   6  610.84   24.10
   4   2   6  656.63   26.00
   4   2   6  661.33   22.60
  -4   2  -6  675.63   26.80
   6  -2   6   61.69    5.80
  -6  -2  -6   58.79    6.30
   6  -2   6   54.59    6.60
   6  -2   6   63.29    7.30
   6   2   6   63.49    7.40
  -6   2  -6   60.59    7.50
   8  -2   6   54.69    6.70
   8  -2   6   57.79    8.60
  -8  -2  -6   56.09    6.60
  -8  -2  -6   53.19    4.70
   8   2   6   58.19    8.90
  -8   2  -6   71.99   10.50
   8   2   6   51.09    6.30
 -10  -2  -6   92.79    6.40
  10  -2   6   84.29    8.40
  10  -2   6   94.19    9.10
 -10  -2  -6   99.79    9.30
 -10   2  -6   72.69    9.50
  10   2   6   85.69    9.00
 -12  -2  -6   24.90    6.30
  12  -2   6   27.80    7.10
 -12  -2  -6   22.30    3.80
  12  -2   6   16.00    5.10
  12   2   6   21.10    6.20
  12   2   6   20.50    6.10
 -12   2  -6   36.80    9.20
 -14  -2  -6   -3.80    2.80
  14  -2   6    0.90    3.20
  14  -2   6    2.10    3.90
 -14  -2  -6    0.80    2.00
  14   2   6    5.20    4.00
  14   2   6   -0.90    3.20
 -14   2  -6    1.80    4.50
 -16  -2  -6    9.70    3.20
  16  -2   6   12.50    5.40
 -16  -2  -6   10.40    5.50
  16  -2   6   10.60    5.50
 -16   2  -6   17.60    4.60
 -16   2  -6   17.00    6.70
  16   2   6   25.90    6.80
  16   2   6   13.10    5.80
 -18  -2  -6  181.48   11.10
  18  -2   6  195.58   14.90
  18  -2   6  175.08   13.40
 -18  -2  -6  177.68   15.70
  18   2   6  192.88   13.80
 -18   2  -6  175.68   11.00
 -18   2  -6  198.88   17.60
  18   2   6  178.18   13.80
  20  -2   6   23.50    6.50
  20  -2   6   25.50    7.60
 -20  -2  -6   18.50    4.60
 -20  -2  -6   24.80    8.40
  20   2   6   22.30    7.60
 -20   2  -6   10.60    3.70
 -20   2  -6   12.70    7.10
  20   2   6   19.70    6.00
 -21  -3   6  152.88   10.00
 -21  -3   6  159.78   11.50
 -21  -3   6  140.09   14.30
 -21  -3   6  155.68   10.40
 -21   3   6  165.38   10.20
 -21   3   6  169.18    8.70
 -19  -3   6    0.30    4.60
 -19  -3   6    5.50    3.00
 -19  -3   6    3.00    2.50
 -19  -3   6    0.80    2.50
 -19   3   6    4.90    2.20
 -17  -3   6   41.30    6.30
 -17  -3   6   40.80    8.40
 -17  -3   6   41.50    6.00
 -17  -3   6   45.10    6.50
 -17   3   6   37.50    3.90
 -15  -3   6  329.37   13.00
 -15  -3   6  295.27   18.10
 -15  -3   6  292.57   13.80
 -15  -3   6  316.47   13.70
 -15  -3   6  322.97   13.80
 -15   3   6  309.37   11.70
 -15   3   6  311.97   11.10
 -13  -3   6  256.07   15.90
 -13  -3   6  287.47   12.60
 -13  -3   6  281.97   12.50
 -13  -3   6  266.67   12.10
 -13  -3   6  272.17   12.70
 -13   3   6  280.37   10.40
 -13   3   6  285.87   10.40
 -11  -3   6   53.99    7.10
 -11  -3   6   46.10    5.20
 -11  -3   6   49.90    5.10
 -11  -3   6   42.10    4.60
 -11   3   6   50.39    3.60
  -9  -3   6   10.40    3.60
  -9  -3   6    6.60    2.80
  -9  -3   6   17.20    4.80
  -9  -3   6   13.40    3.70
  -7  -3   6   12.30    4.10
  -7  -3   6    9.40    2.80
  -7  -3   6   11.20    4.10
  -7  -3   6   10.60    3.20
  -5  -3   6  283.07   13.70
  -5  -3   6  275.97   13.80
  -5  -3   6  256.57   11.70
  -5  -3   6  271.07   12.20
  -5  -3   6  260.77   12.00
   5   3  -6  270.67   10.80
   5   3  -6  273.07   14.30
  -3  -3   6  102.09    6.20
  -3  -3   6   93.39    7.30
  -3  -3   6   92.99    7.90
  -3  -3   6  101.79    7.00
   3   3  -6   96.39    8.90
  -3   3   6   89.79    4.40
  -3   3   6   95.19    8.50
   3   3  -6   95.59    6.00
  -3   3   6   98.39    5.10
  -1  -3   6    4.50    2.30
  -1  -3   6   -1.90    1.70
  -1  -3   6    1.40    2.00
  -1   3   6    1.80    0.80
  -1   3   6    2.90    1.80
   1   3  -6   -0.30    3.20
   1   3  -6    3.10    2.20
  -1   3   6    0.80    2.50
  -1  -3  -6   36.60    6.90
  -1  -3  -6   18.40    3.50
   1  -3   6   19.00    5.30
   1  -3   6   21.60    4.30
   1  -3   6   23.70    4.10
   1   3   6   13.50    4.00
   1   3   6   22.80    3.60
  -1   3  -6   20.90    4.20
   1   3   6   21.90    2.20
   3  -3   6  138.39    8.90
   3  -3   6  133.89    9.00
   3  -3   6  123.99    9.90
  -3  -3  -6  123.99    7.90
  -3   3  -6  144.49   11.10
   3   3   6  130.09   10.10
   3   3   6  132.59    7.50
   3   3   6  119.89    5.80
   5  -3   6  165.88   11.40
   5  -3   6  130.59    9.30
  -5  -3  -6  139.79    9.20
   5  -3   6  135.09    9.20
   5   3   6  147.19    8.40
   5   3   6  139.89   10.80
  -5   3  -6  157.28   12.00
   7  -3   6  299.67   15.30
  -7  -3  -6  317.17   12.30
   7  -3   6  320.27   16.80
  -7  -3  -6  307.77   15.40
   7   3   6  307.77   16.70
   7   3   6  290.37   13.60
  -7   3  -6  302.87   17.80
  -9  -3  -6   26.50    3.80
  -9  -3  -6   27.90    6.20
   9  -3   6   19.20    5.40
   9  -3   6   29.00    6.50
  -9   3  -6   33.50    7.90
   9   3   6   32.50    7.30
  11  -3   6  144.09   11.20
  11  -3   6  141.49   11.40
 -11  -3  -6  125.39    7.90
 -11  -3  -6  136.29   11.00
  11   3   6  138.09   11.30
 -11   3  -6  132.79   12.70
  13  -3   6  299.07   17.10
 -13  -3  -6  299.87   15.00
  13  -3   6  281.87   16.80
 -13  -3  -6  302.97   17.80
 -13   3  -6  293.57   19.90
  15  -3   6  379.16   20.50
 -15  -3  -6  368.06   16.10
 -15  -3  -6  396.86   21.80
  15  -3   6  384.66   20.00
  15   3   6  370.86   20.10
  15   3   6  383.96   20.10
 -17  -3  -6   41.40    9.90
 -17  -3  -6   39.60    6.50
  17  -3   6   28.20    9.10
  17  -3   6   25.50    7.20
 -17   3  -6   37.40   11.00
  17   3   6   36.00    7.70
  17   3   6   28.10    6.80
 -19  -3  -6  180.38   11.40
  19  -3   6  232.58   16.40
 -19  -3  -6  202.48   16.80
  19  -3   6  198.68   14.00
  19   3   6  214.28   15.60
  19   3   6  195.18   15.30
 -19   3  -6  175.78   17.80
 -20  -4   6  169.98   16.30
 -20  -4   6  191.48   11.80
 -20  -4   6  201.48   11.70
 -20  -4   6  192.18   11.20
 -20   4   6  189.48    8.80
 -20   4   6  178.18   10.90
 -18  -4   6  239.18   12.30
 -18  -4   6  216.08   13.30
 -18  -4   6  238.08   12.80
 -18  -4   6  213.78   16.70
 -18   4   6  244.38    9.90
 -16  -4   6   35.10    8.70
 -16  -4   6   28.50    5.20
 -16  -4   6   25.70    4.60
 -16  -4   6   34.60    6.10
 -16   4   6   25.50    3.40
 -16   4   6   21.20    4.50
 -14  -4   6  559.14   27.00
 -14  -4   6  571.24   20.90
 -14  -4   6  554.64   21.70
 -14  -4   6  540.75   21.60
 -14  -4   6  605.04   21.50
 -14   4   6  571.14   22.00
 -14   4   6  614.34   18.00
 -14   4   6  598.34   18.20
 -12  -4   6  650.13   23.80
 -12  -4   6  627.44   28.40
 -12  -4   6  669.33   23.90
 -12  -4   6  671.43   24.20
 -12   4   6  680.33   19.90
 -10  -4   6  324.47   14.20
 -10  -4   6  330.17   15.00
 -10  -4   6  298.97   17.10
 -10  -4   6  342.27   14.40
  10   4  -6  279.37   13.40
 -10   4   6  321.67   10.60
  -8  -4   6   71.79    6.30
  -8  -4   6   77.89    7.20
  -8  -4   6   70.19    6.10
  -8  -4   6   79.59    8.10
  -6  -4   6  153.58   10.90
  -6  -4   6  171.18    9.70
  -6  -4   6  158.48   10.40
  -6  -4   6  151.48    8.90
  -6   4   6  166.28    6.20
   6   4  -6  165.98    7.30
   6   4  -6  169.78   12.30
  -6   4   6  165.48    6.80
  -4  -4   6  179.48   11.20
  -4  -4   6  171.88   11.00
  -4  -4   6  162.98    7.80
  -4  -4   6  163.38    9.80
  -4  -4   6  151.98    8.80
   4   4  -6  167.58    8.00
  -4   4   6  172.08    6.40
  -4   4   6  179.48    7.50
   4   4  -6  167.58   12.60
  -2  -4   6 1212.38   40.10
  -2  -4   6 1186.78   38.70
  -2  -4   6 1187.48   40.40
  -2  -4   6 1227.48   36.50
  -2  -4   6 1230.08   37.20
  -2   4   6 1231.18   33.50
  -2   4   6 1194.48   35.20
   2   4  -6 1191.28   36.30
  -2   4   6 1211.78   41.90
   2   4  -6 1215.78   43.70
   0  -4  -6  293.97   14.50
   0  -4   6  320.77   14.70
   0  -4   6  294.07   15.70
   0  -4  -6  303.47   12.00
   0  -4   6  298.87   13.20
   0  -4   6  316.67   15.20
   0   4   6  310.27   16.70
   0   4  -6  311.77   13.00
   0   4  -6  292.07   17.80
   0   4   6  318.77   10.50
   0   4   6  298.97   12.10
   2  -4   6   84.29    8.40
  -2  -4  -6   88.19    6.40
   2  -4   6   89.09    7.10
   2  -4   6  110.49    8.40
  -2   4  -6   97.19   10.30
   2   4   6   98.29    6.20
   2   4   6   81.89    8.80
   2   4   6   85.09    4.50
   4  -4   6  180.38   10.90
   4  -4   6  158.78   10.70
  -4  -4  -6  200.78   11.10
   4  -4   6  200.88   13.00
  -4   4  -6  192.98   14.10
   4   4   6  181.78    8.40
   4   4   6  204.68   10.00
   4   4   6  198.48   13.10
  -6  -4  -6  559.34   18.70
   6  -4   6  575.74   24.50
   6  -4   6  545.55   22.60
  -6  -4  -6  602.24   22.60
  -6   4  -6  541.25   26.40
   6   4   6  541.15   20.70
   6   4   6  566.64   24.70
   8  -4   6  657.13   27.00
  -8  -4  -6  604.24   20.80
  -8  -4  -6  630.84   25.10
   8  -4   6  593.94   25.00
  -8   4  -6  632.04   29.50
   8   4   6  642.74   27.00
  10  -4   6  766.72   31.00
 -10  -4  -6  802.82   30.50
 -10  -4  -6  767.32   25.40
  10   4   6  760.72   31.10
 -10   4  -6  755.52   34.20
  12  -4   6   51.69    8.90
  12  -4   6   58.89    9.10
 -12  -4  -6   48.50    5.10
 -12  -4  -6   67.29   10.70
 -12   4  -6   61.69   12.60
  12   4   6   74.89   15.80
  14  -4   6  282.67   17.40
 -14  -4  -6  307.47   18.50
  14  -4   6  310.77   17.80
 -14  -4  -6  298.67   13.80
  14   4   6  319.87   18.30
 -14   4  -6  303.97   22.30
 -16  -4  -6  482.05   19.70
  16  -4   6  477.95   28.70
  16  -4   6  486.45   24.50
  16   4   6  511.45   24.50
 -16   4  -6  530.55   29.70
  18  -4   6  322.47   18.80
  18  -4   6  308.27   19.30
 -18  -4  -6  330.87   21.00
 -18  -4  -6  300.07   15.10
 -18   4  -6  362.86   25.10
  18   4   6  313.57   18.50
  18   4   6  347.27   20.00
 -21  -5   6  283.67   15.60
 -21  -5   6  243.38   14.30
 -21  -5   6  268.97   14.40
 -21   5   6  303.97   11.30
 -19  -5   6  111.39    8.60
 -19  -5   6   85.89   14.40
 -19  -5   6  104.89    9.10
 -19  -5   6   89.39    8.30
 -19   5   6  108.59    5.90
 -17  -5   6   28.20    5.20
 -17  -5   6   27.30    5.60
 -17  -5   6   33.30    6.50
 -17  -5   6   45.20   12.20
 -17   5   6   32.50    3.10
 -17   5   6   22.00    4.90
 -15  -5   6  121.29   10.30
 -15  -5   6  128.69   10.20
 -15  -5   6  141.49    9.00
 -15  -5   6  110.39   12.40
 -15  -5   6  116.09    8.20
 -15   5   6  134.99    5.90
 -13  -5   6  594.24   23.20
 -13  -5   6  597.04   24.60
 -13  -5   6  583.44   28.40
 -13  -5   6  610.84   23.00
 -13  -5   6  603.14   23.10
 -13   5   6  644.54   18.10
 -13   5   6  578.24   18.30
 -11  -5   6  581.44   22.60
 -11  -5   6  562.04   27.30
 -11  -5   6  620.24   23.70
 -11  -5   6  621.34   23.40
 -11   5   6  602.94   19.00
 -11   5   6  648.84   18.00
  -9  -5   6  316.77   15.60
  -9  -5   6  286.27   13.90
  -9  -5   6  297.47   14.60
  -9  -5   6  307.97   17.80
  -9   5   6  335.77   12.30
  -9   5   6  314.87   12.10
  -7  -5   6  196.38   10.50
  -7  -5   6  186.68   11.00
  -7  -5   6  178.18   11.50
  -7  -5   6  178.88   12.30
   7   5  -6  210.28   14.80
  -7   5   6  196.88   12.00
  -7   5   6  179.18    7.90
  -7   5   6  174.58    8.10
  -5  -5   6  331.57   14.50
  -5  -5   6  345.57   12.50
  -5  -5   6  352.86   16.10
  -5  -5   6  334.87   17.30
  -5  -5   6  334.27   16.70
  -5   5   6  331.17   12.40
   5   5  -6  329.87   12.40
   5   5  -6  359.66   20.30
  -5   5   6  326.07   13.60
  -5   5   6  345.77   10.60
  -3  -5   6  975.20   31.00
  -3  -5   6  962.60   32.90
  -3  -5   6  973.60   29.30
  -3  -5   6  917.21   33.90
  -3  -5   6  898.91   33.90
  -3   5   6  905.11   30.20
  -3   5   6  967.60   26.40
   3   5  -6  956.90   41.60
   3   5  -6  936.41   29.10
  -1  -5   6 1030.70   34.90
  -1  -5   6 1035.90   31.90
  -1  -5   6 1002.40   36.10
   1  -5  -6  985.70   32.90
  -1  -5   6  955.70   38.20
  -1  -5   6  990.70   32.20
  -1   5   6 1002.40   37.50
   1   5  -6  986.20   31.30
   1   5  -6 1043.30   40.70
  -1   5   6 1037.70   31.20
  -1   5   6  999.10   28.20
   1  -5   6  471.15   17.70
  -1  -5  -6  499.65   17.30
   1  -5   6  443.26   21.00
   1  -5   6  434.76   20.10
   1  -5   6  463.35   18.30
   1  -5   6  457.35   20.00
   1   5   6  447.76   14.50
  -1   5  -6  495.35   25.30
  -1   5  -6  455.85   19.10
   1   5   6  469.55   22.30
   1   5   6  462.35   17.30
   3  -5   6  154.18    8.70
   3  -5   6  131.29   10.90
   3  -5   6  131.89    9.90
   3  -5   6  142.79    9.40
  -3  -5  -6  155.78    8.90
   3   5   6  151.38   11.80
  -3   5  -6  143.79   13.50
   3   5   6  133.69    6.20
   3   5   6  154.18    8.60
   5  -5   6  343.67   16.40
  -5  -5  -6  368.06   15.90
   5  -5   6  352.46   18.40
  -5  -5  -6  345.67   12.70
  -5   5  -6  367.96   21.40
   5   5   6  311.87   18.00
   5   5   6  336.27   14.70
   7  -5   6  401.76   20.20
  -7  -5  -6  373.96   14.40
  -7  -5  -6  418.46   18.40
   7  -5   6  372.16   18.30
  -7   5  -6  415.56   23.60
   7   5   6  406.16   20.70
  -9  -5  -6  518.75   18.50
  -9  -5  -6  545.25   22.90
   9  -5   6  516.35   24.20
   9  -5   6  515.65   23.10
  -9   5  -6  499.95   27.50
   9   5   6  542.65   24.90
  11  -5   6  300.57   18.20
  11  -5   6  325.57   18.40
 -11  -5  -6  302.07   17.00
 -11  -5  -6  325.87   13.50
 -11   5  -6  298.77   21.10
  13  -5   6   72.49   10.80
 -13  -5  -6   63.69    6.00
 -13  -5  -6   66.09    8.60
 -13   5  -6   65.19   13.00
  13   5   6   74.29   11.40
  15  -5   6   39.30    8.80
 -15  -5  -6   23.60    6.90
 -15  -5  -6   35.80    5.90
  15  -5   6   26.20    6.60
 -15   5  -6   41.80   12.40
  15   5   6   45.00    9.70
 -17  -5  -6  278.87   14.10
  17  -5   6  301.37   19.00
 -17  -5  -6  277.67   19.10
  17  -5   6  292.57   17.90
 -17   5  -6  300.67   23.30
  17   5   6  302.47   18.70
 -20  -6   6   41.70    6.70
 -20  -6   6   50.09    8.10
 -20   6   6   47.00    3.60
 -20   6   6   39.50    7.80
 -18  -6   6    0.80    2.90
 -18  -6   6    1.50    3.10
 -18  -6   6    5.40    2.90
 -18  -6   6    3.50    2.90
 -18   6   6    5.70    4.50
 -16  -6   6   50.89    6.00
 -16  -6   6   52.39    6.90
 -16  -6   6   48.20    6.20
 -16  -6   6   48.00   10.70
 -16  -6   6   49.40    6.90
 -16   6   6   68.79    7.80
 -14  -6   6   37.40    5.80
 -14  -6   6   36.10    9.50
 -14  -6   6   32.40    6.30
 -14  -6   6   48.10    7.20
 -14  -6   6   38.90    7.20
 -14   6   6   37.30    6.90
 -12  -6   6  296.27   13.70
 -12  -6   6  313.07   15.80
 -12  -6   6  279.17   15.00
 -12  -6   6  306.97   20.30
 -12  -6   6  296.97   16.60
 -12   6   6  301.97   10.70
 -10  -6   6   32.20    6.00
 -10  -6   6   42.70    7.30
 -10  -6   6   32.60    8.10
 -10  -6   6   34.80    6.30
 -10   6   6   36.00    7.30
 -10   6   6   34.30    3.50
  -8  -6   6  234.08   18.10
  -8  -6   6  239.98   13.40
  -8  -6   6  239.98   14.00
  -8  -6   6  231.38   12.30
  -8   6   6  244.78   10.20
  -8   6   6  240.38    9.70
  -8   6   6  232.48   14.80
   8   6  -6  282.27   27.80
  -6  -6   6   94.49    8.80
  -6  -6   6   95.49    9.00
  -6  -6   6   86.69    7.20
  -6  -6   6  103.29    8.60
   6   6  -6   96.59   11.60
  -6   6   6   92.49    5.80
  -6   6   6   90.89   10.20
  -4  -6   6  586.74   25.90
  -4  -6   6  610.64   25.50
  -4  -6   6  638.44   24.90
  -4   6   6  617.74   20.70
   4   6  -6  617.74   30.60
   4   6  -6  583.54   19.90
  -2  -6   6  217.98   14.10
  -2  -6   6  268.57   11.90
   2  -6  -6  253.27   13.30
  -2  -6   6  250.27   15.00
  -2  -6   6  238.38   12.00
  -2  -6   6  251.57   14.30
  -2   6   6  266.57   11.50
   2   6  -6  261.27   11.20
   2   6  -6  284.17   19.40
  -2   6   6  247.28    8.40
   0  -6   6  379.46   16.00
   0  -6   6  374.56   18.50
   0  -6   6  403.86   16.40
   0  -6  -6  406.16   14.90
   0  -6   6  394.66   19.70
   0   6   6  378.86   15.40
   0   6   6  355.56   20.30
   0   6   6  383.66   12.30
   0   6  -6  422.86   24.40
   2  -6   6   10.90    3.60
  -2  -6  -6   12.10    3.50
   2  -6   6    7.20    4.40
   2  -6   6   16.60    4.80
   2  -6   6    7.80    3.00
   2   6   6   17.20    3.80
  -2   6  -6   13.30    6.80
   2   6   6   14.80    2.30
   2   6   6   13.30    5.10
   4  -6   6  302.47   15.20
   4  -6   6  306.57   16.60
   4  -6   6  322.47   18.00
  -4  -6  -6  336.37   14.70
  -4  -6  -6  333.27   11.60
   4  -6   6  304.87   13.60
  -4   6  -6  293.97   21.00
   4   6   6  286.77   13.70
   4   6   6  330.67   18.60
   4   6   6  270.07   10.60
  -6  -6  -6  115.29    8.70
  -6  -6  -6  128.89    6.70
   6  -6   6  105.49    7.50
   6  -6   6  130.29   11.50
   6  -6   6  112.19    9.50
   6  -6   6  110.59    9.90
  -6   6  -6  122.69   13.80
   6   6   6  117.19   11.20
  -8  -6  -6  189.58    9.00
   8  -6   6  187.88   10.00
   8  -6   6  174.08   12.60
   8  -6   6  180.28   12.40
  -8  -6  -6  201.78   12.30
   8  -6   6  167.48   13.30
   8   6   6  197.08   14.40
  -8   6  -6  180.18   16.60
  10  -6   6    6.00    7.30
  10  -6   6    6.30    4.40
 -10  -6  -6    2.40    2.20
 -10  -6  -6    4.70    4.20
  10   6   6    0.00    3.70
 -10   6  -6   -3.90    5.10
 -12  -6  -6   19.80    6.20
  12  -6   6   20.90    6.00
 -12  -6  -6   34.40    6.40
  12  -6   6   36.90    8.40
  12   6   6   21.30    7.10
  14  -6   6    6.50    4.90
  14  -6   6   -0.70    3.80
 -14  -6  -6    3.60    2.60
 -14  -6  -6    6.00    5.10
  14   6   6    1.40    4.40
 -14   6  -6    3.00    6.00
  16  -6   6   97.29   10.80
 -16  -6  -6   91.89    7.70
 -16  -6  -6  112.49   11.60
  16  -6   6   90.39   10.70
 -16   6  -6   72.49   13.90
  16   6   6   87.69   10.70
 -17  -7   6    2.70    3.70
 -17  -7   6    6.10    3.00
 -17  -7   6    2.40    3.20
 -17  -7   6    3.70    3.70
 -17   7   6    1.30    3.70
 -15  -7   6    1.40    2.50
 -15  -7   6    3.10    3.70
 -15  -7   6    3.20    3.40
 -15  -7   6   -0.10    3.20
 -15   7   6    6.90    4.80
 -13  -7   6    3.30    3.70
 -13  -7   6    0.60    2.30
 -13  -7   6   -2.90    2.60
 -13  -7   6    0.90    3.10
 -13   7   6    8.40    5.20
 -11  -7   6   49.70    8.40
 -11  -7   6   45.70    6.90
 -11  -7   6   57.69    7.20
 -11   7   6   59.79    4.10
 -11   7   6   62.29   10.70
  -9  -7   6   29.30    7.20
  -9  -7   6   46.50    8.60
  -9   7   6   39.00    4.10
  -9   7   6   32.50    8.30
  -9   7   6   30.40    3.30
   9   7  -6   42.90   10.70
  -7  -7   6   55.89    7.10
  -7  -7   6   48.50    8.40
  -7  -7   6   46.10    6.70
  -7   7   6   60.79    6.10
  -7   7   6   64.39   11.70
   7   7  -6   47.30   10.60
  -5  -7   6   34.80    6.90
  -5  -7   6   32.80    5.40
  -5  -7   6   29.70    6.10
   5   7  -6   42.10    4.00
   5   7  -6   29.70    8.50
  -5   7   6   40.80    4.20
  -3  -7   6    7.00    4.30
  -3  -7   6    4.90    2.90
  -3  -7   6    1.50    3.00
  -3   7   6    8.10    2.70
   3   7  -6   10.20    2.40
   3   7  -6   19.60    8.50
   1  -7  -6   44.20    4.10
  -1  -7   6   27.30    4.50
  -1  -7   6   31.90    6.60
  -1  -7   6   40.40    8.40
  -1   7   6   31.50    5.10
   1   7  -6   32.30    9.20
   1  -7   6   25.70    6.10
  -1  -7  -6   47.90    4.90
   1  -7   6   37.50    6.30
   1  -7   6   42.40    8.20
   1  -7   6   35.00    5.10
   1   7   6   35.00    8.10
  -1   7  -6   42.20   11.40
   1   7   6   39.90    2.80
   1   7   6   44.80    4.90
   3  -7   6   13.80    5.70
  -3  -7  -6   21.00    4.70
   3  -7   6   14.50    4.80
   3  -7   6   13.50    3.40
   3  -7   6   20.90    6.70
   3   7   6    8.90    1.80
   3   7   6    7.40    4.10
  -3   7  -6   15.50    7.20
   3   7   6   12.40    3.70
   5  -7   6   38.50    6.40
  -5  -7  -6   56.39    6.20
   5  -7   6   48.00    8.70
   5  -7   6   35.80    7.60
   5  -7   6   50.59    5.60
  -5  -7  -6   58.19    4.30
   5   7   6   54.39    9.00
  -5   7  -6   49.99   12.20
   7  -7   6   38.50    5.30
   7  -7   6   44.60   12.00
  -7  -7  -6   35.10    3.90
  -7  -7  -6   34.40    6.50
   7  -7   6   38.90    7.30
   7   7   6   24.60   11.90
  -7   7  -6   28.80    9.10
  -9  -7  -6   32.30    6.60
  -9  -7  -6   35.60    4.20
   9  -7   6   40.40    5.40
   9  -7   6   36.30    7.80
   9  -7   6   44.50    9.20
   9  -7   6   30.00    7.90
  -9   7  -6   36.00    9.60
   9   7   6   33.30    7.80
  11  -7   6  111.79   11.90
  11  -7   6  111.29   11.10
  11  -7   6  134.99   11.90
 -11  -7  -6  124.79    7.80
  11  -7   6  144.59    8.60
 -11  -7  -6  121.59   10.80
  11   7   6  117.79   12.20
 -11   7  -6  119.09   15.70
  13  -7   6    0.80    4.10
  13  -7   6   -0.70    4.00
  13  -7   6    6.80    3.30
 -13  -7  -6    3.00    4.30
  13  -7   6    8.70    5.70
 -13  -7  -6    4.30    2.90
  13   7   6    8.50    4.80
 -13   7  -6    2.80    5.80
 -15  -7  -6   -0.40    3.80
  15  -7   6    1.00    2.50
 -15  -7  -6    0.00    2.60
  15  -7   6    0.30    3.80
  15  -7   6    0.00    4.00
  15  -7   6    0.20    3.80
 -15   7  -6    4.70    7.40
  15   7   6   -1.40    4.00
 -16  -8   6   52.49    8.80
 -16  -8   6   53.39    6.40
 -16  -8   6   67.69    8.50
 -16  -8   6   68.29    8.00
 -16   8   6   61.99   11.00
 -14  -8   6  115.19   10.60
 -14  -8   6  103.59    9.40
 -14  -8   6  102.39    8.20
 -14  -8   6   97.89    9.80
 -14   8   6  106.69   12.70
 -12  -8   6  172.58   13.00
 -12  -8   6  170.08   12.70
 -12  -8   6  181.78   10.50
 -12  -8   6  178.28   11.90
 -12   8   6  170.88   15.10
 -10  -8   6   55.69    7.50
 -10  -8   6   65.39    8.10
 -10  -8   6   55.49    9.20
 -10   8   6   59.19   10.70
 -10   8   6   67.89    5.50
 -10   8   6   60.69    4.40
  -8  -8   6  359.56   19.70
  -8  -8   6  354.96   18.70
  -8  -8   6  358.76   17.40
   8   8  -6  387.06   26.00
  -8   8   6  372.56   15.30
  -8   8   6  401.16   23.30
  -6  -8   6  117.29   11.20
  -6  -8   6  150.68   10.20
  -6  -8   6  125.19   10.80
  -6   8   6  131.39   14.20
  -6   8   6  127.69    8.20
   6   8  -6  154.68   16.50
  -4  -8   6   82.29   14.00
  -4  -8   6   73.39   12.50
  -4  -8   6   65.69   10.30
   4   8  -6   77.09    5.60
  -4   8   6   75.89    6.10
   4   8  -6   59.79   13.80
  -2  -8   6  215.28   15.20
   2  -8  -6  234.18   10.20
  -2  -8   6  221.68   12.20
  -2   8   6  207.58   11.20
   2   8  -6  213.08   20.10
   0  -8  -6  379.06   15.30
   0  -8   6  349.27   24.20
   0  -8   6  381.26   16.70
   0   8  -6  383.06   26.70
   2  -8   6  121.49    8.70
  -2  -8  -6  142.49    8.80
   2  -8   6  124.09   14.30
   2   8   6  113.59    8.50
  -2   8  -6   84.49   15.10
   2   8   6  139.09    5.70
   2   8   6  126.49   14.90
  -4  -8  -6  291.37   14.00
   4  -8   6  277.67   13.30
  -4  -8  -6  269.47   10.20
   4  -8   6  249.18   17.10
   4  -8   6  265.97   16.80
  -4   8  -6  292.37   23.40
   4   8   6  239.58    9.60
   6  -8   6   36.10    8.20
   6  -8   6   30.30    5.10
  -6  -8  -6   29.80    3.60
   6  -8   6   26.40    7.50
  -6  -8  -6   42.70    7.20
   6   8   6   27.10    7.50
  -6   8  -6   29.50   11.50
   8  -8   6   77.49    6.70
   8  -8   6   80.69    9.90
   8  -8   6   81.59   10.50
  -8  -8  -6   78.39    5.70
  -8  -8  -6   78.59    8.10
  -8   8  -6   73.09   14.10
   8   8   6   81.49   12.60
  10  -8   6  258.27   16.70
  10  -8   6  214.08   16.40
 -10  -8  -6  241.18   11.10
 -10  -8  -6  221.98   14.40
  10  -8   6  235.78   16.80
  10  -8   6  232.78   11.80
  10   8   6  268.37   17.90
 -10   8  -6  238.78   21.60
  12  -8   6  153.18   13.60
  12  -8   6  168.28   14.80
 -12  -8  -6  144.29    8.90
  12  -8   6  179.08    9.90
 -12  -8  -6  152.18   12.60
  12  -8   6  169.08   14.40
 -12   8  -6  162.58   18.70
  12   8   6  166.58   14.70
  14  -8   6   32.30    8.70
 -14  -8  -6   31.80    8.00
 -14  -8  -6   25.60    4.90
  14  -8   6   25.00    4.40
  14  -8   6   17.50    6.00
  14   8   6   27.60    7.80
 -14   8  -6   16.10   10.50
 -15  -9   6   75.29    8.60
 -15  -9   6   80.59   12.60
 -15  -9   6   76.89    7.60
 -15  -9   6   56.99    9.60
 -15   9   6   70.09   12.90
 -13  -9   6  414.56   18.10
 -13  -9   6  410.86   20.10
 -13  -9   6  420.96   21.80
 -13   9   6  443.46   25.90
 -11  -9   6  178.88   12.20
 -11  -9   6  168.88   10.30
 -11  -9   6  194.68   13.70
 -11  -9   6  163.68   15.80
 -11   9   6  175.68   16.50
 -11   9   6  165.98    7.40
  -9  -9   6  126.79   12.00
  -9  -9   6  127.79   10.30
  -9  -9   6  141.49   11.70
   9   9  -6  154.98   17.70
  -9   9   6  140.29    8.80
  -9   9   6  137.39   18.00
  -7  -9   6  552.24   25.90
  -7  -9   6  517.45   24.40
  -7  -9   6  464.25   21.40
  -7   9   6  511.05   20.00
   7   9  -6  513.35   32.00
  -5  -9   6  230.08   13.40
  -5  -9   6  211.78   15.00
  -5  -9   6  252.27   16.90
   5   9  -6  230.78   10.50
  -5   9   6  240.78   12.20
   5   9  -6  239.08   21.70
  -3  -9   6  428.86   22.80
  -3  -9   6  382.76   18.10
   3  -9  -6  443.56   15.70
   3   9  -6  413.86   29.30
  -3   9   6  378.96   17.30
  -1  -9   6  451.85   23.50
  -1  -9   6  480.25   20.50
   1  -9  -6  533.75   18.90
  -1   9   6  465.35   19.90
   1   9  -6  528.55   33.20
   1  -9   6  248.48   16.70
   1  -9   6  259.77   14.80
  -1  -9  -6  249.88   12.50
   1  -9   6  237.88   17.10
  -1   9  -6  282.97   23.80
   1   9   6  220.68   17.40
  -3  -9  -6  365.66   16.40
   3  -9   6  347.67   20.00
   3  -9   6  344.77   20.90
   3   9   6  348.97   11.60
   3   9   6  344.77   21.90
  -3   9  -6  332.27   26.50
   5  -9   6  342.37   17.40
   5  -9   6  390.56   21.50
   5  -9   6  329.77   21.00
  -5  -9  -6  370.16   13.00
  -5  -9  -6  393.76   17.80
   5   9   6  360.36   22.00
  -5   9  -6  341.97   27.20
  -7  -9  -6   15.60    3.10
   7  -9   6    9.30    3.50
  -7  -9  -6   15.90    5.20
   7  -9   6   13.50    6.20
   7  -9   6   17.90    6.60
   7   9   6   13.00    6.10
  -7   9  -6   16.50    8.30
   9  -9   6  293.57   19.70
   9  -9   6  269.27   18.50
  -9  -9  -6  304.57   12.30
  -9  -9  -6  287.17   16.40
   9  -9   6  279.07   13.70
  -9   9  -6  278.67   25.20
   9   9   6  258.37   18.60
 -11  -9  -6  165.48    9.30
  11  -9   6  170.78   14.90
  11  -9   6  147.49   14.50
  11  -9   6  184.78   10.40
 -11  -9  -6  181.28   13.50
  11   9   6  154.08   14.60
 -11   9  -6  175.58   20.10
 -12 -10   6  171.08   12.70
 -12 -10   6  178.98   14.30
 -12 -10   6  182.78   11.10
 -12 -10   6  184.08   14.80
 -12  10   6  184.48   18.30
 -10 -10   6  354.36   20.80
 -10 -10   6  319.47   15.40
 -10 -10   6  347.07   18.20
 -10 -10   6  323.87   19.30
 -10  10   6  302.27   14.90
 -10  10   6  386.76   25.70
  10  10  -6  375.46   28.40
  -8 -10   6  122.39   10.30
  -8 -10   6  113.89   11.30
  -8 -10   6  125.69   12.50
  -8  10   6  101.99    8.10
   8  10  -6  118.89   19.90
  -8  10   6  126.69   15.30
  -6 -10   6   12.60    5.00
  -6 -10   6   15.00    6.10
  -6 -10   6   14.10    4.90
   6  10  -6   18.80    4.00
  -6  10   6    9.70    8.30
   6  10  -6   16.00    9.60
  -4 -10   6  277.37   18.00
  -4 -10   6  265.07   18.50
   4 -10  -6  276.47   11.70
  -4 -10   6  275.97   15.20
  -4  10   6  274.27   14.00
   4  10  -6  310.17   26.10
  -2 -10   6  203.08   12.40
  -2 -10   6  153.08   14.30
   2 -10  -6  192.28    9.90
  -2 -10   6  180.58   14.70
   2  10  -6  179.18   21.50
   0 -10   6  418.26   23.00
   0 -10   6  413.06   19.10
   0 -10   6  445.36   24.70
   0 -10  -6  441.86   17.90
   0  10  -6  436.16   31.90
   2 -10   6  100.79   11.20
   2 -10   6  105.89    8.80
   2 -10   6  114.39   12.90
  -2 -10  -6  119.49    8.70
  -2  10  -6  106.49   19.40
   2  10   6   88.79   13.60
   4 -10   6    7.80    5.30
   4 -10   6    9.50    6.60
   4 -10   6   12.00    4.10
  -4 -10  -6   14.40    4.80
  -4  10  -6    0.90    7.10
   4  10   6   10.70    6.10
   4  10   6    8.80    1.80
   6 -10   6   55.59   10.50
   6 -10   6   63.09   10.40
  -6 -10  -6   89.39    8.80
   6 -10   6   88.69    8.00
  -6 -10  -6   73.39    5.10
   6  10   6   59.59   11.30
  -6  10  -6  101.69   19.10
  -8 -10  -6  348.67   18.70
   8 -10   6  362.46   22.10
   8 -10   6  334.27   22.30
  -8 -10  -6  378.26   13.90
   8 -10   6  392.66   16.90
   8  10   6  341.87   22.20
  -8  10  -6  322.07   28.40
   9  11  -6    5.40    9.20
  -9  11   6   16.60    8.60
  -7 -11   6    3.50    3.80
  -7 -11   6   -1.00    4.10
  -7 -11   6    3.20    5.40
   7  11  -6    4.30    7.80
  -7  11   6   -0.40    7.20
   5 -11  -6  112.29    7.00
  -5 -11   6  119.49   10.20
  -5 -11   6  109.39   11.70
  -5 -11   6  123.99   13.10
   5  11  -6   98.99   19.00
  -5  11   6  112.09   19.60
  -3 -11   6    6.50    5.90
  -3 -11   6   -3.50    3.40
   3 -11  -6   -1.00    2.20
  -3 -11   6    1.10    3.70
   3  11  -6   15.40   11.10
  -1 -11   6   99.19    9.40
   1 -11  -6  100.19    7.60
  -1 -11   6  101.39   12.60
  -1 -11   6   87.99   11.30
   1  11  -6   98.39   23.80
   1 -11   6   38.40    8.80
  -1 -11  -6   55.79    6.30
   1 -11   6   41.00    6.70
   1 -11   6   53.89   11.80
  -1  11  -6   46.60   15.50
   3 -11   6   15.50    6.80
   3 -11   6   22.20    7.10
   3 -11   6   24.30    5.60
  -3 -11  -6   32.60    6.10
  -3  11  -6   20.60   11.90
   3  11   6   29.90    8.90
   5 -11   6   -4.10    4.00
   5 -11   6   -0.80    2.70
  -5 -11  -6    1.00    3.30
   5 -11   6    1.50    4.10
  -5  11  -6   16.50   10.90
   5  11   6   -0.70    5.30
 -22   0   7   -1.10    2.20
 -22   0   7    0.90    2.10
 -22   0   7    5.40    5.20
 -22   0   7    2.40    2.90
 -20   0   7    5.00    3.20
 -20   0   7    1.10    2.40
 -20   0   7    2.70    2.10
 -18   0   7    0.90    3.10
 -18   0   7   -1.00    1.90
 -16   0   7   -1.10    1.90
 -16   0   7    2.10    2.30
 -14   0   7    2.60    2.20
 -14   0   7    6.70    2.50
 -14   0   7    0.00    2.20
 -14   0   7    1.20    2.30
 -12   0   7    2.40    2.50
 -12   0   7   -1.00    1.90
 -12   0   7    0.10    2.10
 -10   0   7   -1.20    1.70
 -10   0   7    0.60    1.70
 -10   0   7    2.90    2.60
  -8   0   7   -1.00    1.80
  -8   0   7   -1.30    2.40
  -6   0   7    0.40    2.10
  -6   0   7   -1.50    2.30
  -6   0   7    1.10    1.30
  -4   0   7   -0.70    2.50
  -4   0   7   -0.50    1.50
  -4   0   7    1.00    2.60
  -2   0   7    2.00    2.50
  -2   0   7    2.40    3.00
   0   0  -7   14.00    3.70
   0   0   7    9.90    3.50
   0   0   7    7.90    2.30
   0   0   7    8.40    3.70
  -2   0  -7    2.30    2.50
   2   0   7   -0.20    1.60
   2   0   7    0.80    2.50
   2   0   7    1.20    3.40
   4   0   7    0.00    2.20
   4   0   7   -1.40    2.80
   4   0   7    2.70    2.10
  -6   0  -7    2.00    3.20
   6   0   7    0.20    1.70
   6   0   7    3.50    3.80
   6   0   7    2.90    2.90
   8   0   7   -2.20    3.00
   8   0   7   -2.80    2.20
  -8   0  -7    0.20    2.50
 -10   0  -7   -1.70    3.30
  10   0   7    1.60    3.60
  10   0   7   -1.50    2.80
  12   0   7    1.30    3.30
 -12   0  -7   -1.20    3.40
  12   0   7    2.30    4.20
  14   0   7    0.00    3.40
 -14   0  -7    1.50    3.90
 -14   0  -7    4.30    2.80
  14   0   7    2.40    5.00
  16   0   7   -1.50    3.90
 -16   0  -7   -5.40    4.40
  16   0   7    2.60    4.00
 -16   0  -7   -2.30    2.40
 -18   0  -7    0.60    2.60
 -18   0  -7   -2.80    4.10
  18   0   7    3.40    5.00
  18   0   7    1.50    4.00
 -21  -1   7   10.40    3.20
 -21  -1   7    9.10    3.50
 -21  -1   7    9.90    3.60
 -21  -1   7    8.90    5.50
 -21   1   7   13.80    3.80
 -21   1   7   11.40    3.10
 -19  -1   7   32.20    4.90
 -19  -1   7   31.80    5.00
 -19  -1   7   32.30    5.30
 -19  -1   7   34.30    7.60
 -19   1   7   26.10    4.90
 -19   1   7   27.30    4.10
 -19   1   7   26.00    4.10
 -17  -1   7  143.69    7.60
 -17  -1   7  138.89    8.60
 -17  -1   7  118.49   10.30
 -17   1   7  150.68    8.30
 -17   1   7  139.69    8.10
 -17   1   7  137.89    7.60
 -15  -1   7    6.70    2.50
 -15  -1   7   11.40    3.30
 -15  -1   7   20.70    4.90
 -15  -1   7   15.00    3.60
 -15  -1   7    9.80    3.30
 -15   1   7   11.00    3.40
 -15   1   7   15.30    3.40
 -15   1   7    8.80    2.70
 -13  -1   7    1.20    2.30
 -13  -1   7    5.20    2.50
 -13   1   7    1.20    1.90
 -13   1   7    3.30    2.20
 -13   1   7    0.90    1.80
 -13   1   7    7.10    3.40
 -11  -1   7  483.65   19.40
 -11  -1   7  483.55   18.10
 -11   1   7  479.85   19.10
 -11   1   7  490.35   19.40
 -11   1   7  476.25   17.30
  -9  -1   7    0.50    2.60
  -9  -1   7    1.10    2.10
  -9  -1   7   -0.30    1.40
  -9  -1   7    2.10    1.90
  -9  -1   7    1.10    1.70
  -9   1   7    4.40    2.50
  -9   1   7   -0.90    2.50
  -7  -1   7  117.79    6.30
  -7  -1   7  112.89    7.00
  -7  -1   7  118.29    8.80
  -7  -1   7  112.59    6.90
  -7   1   7   96.29    8.30
  -7   1   7  111.09    8.20
  -5  -1   7  205.48    9.90
  -5  -1   7  218.98   12.60
  -5  -1   7  194.78   10.10
  -5   1   7  207.98   12.50
  -5   1   7  187.78   11.20
  -5   1   7  211.68    8.40
  -3  -1   7  226.58   10.80
  -3  -1   7  236.68   11.50
  -3  -1   7  196.28   12.50
  -3   1   7  232.88    9.60
  -3   1   7  233.08   12.60
  -1  -1   7  587.24   22.20
  -1  -1   7  613.64   21.70
  -1  -1   7  628.34   24.90
   1   1  -7  543.35   21.70
  -1   1   7  629.44   24.00
  -1   1   7  605.64   20.20
   1   1  -7  591.84   22.70
   1  -1   7  893.31   29.70
   1  -1   7  894.21   30.70
  -1  -1  -7  916.11   29.50
   1  -1   7  851.61   32.50
  -1   1  -7  896.91   31.30
   1   1   7  896.01   28.50
   1   1   7  866.91   31.70
   1   1   7  867.91   33.00
   3  -1   7   19.00    5.50
   3  -1   7   14.40    3.70
   3  -1   7   12.50    4.40
  -3  -1  -7   19.40    4.40
   3   1   7   14.40    3.50
   3   1   7   11.30    4.50
  -3   1  -7   16.50    5.70
   3   1   7   21.70    6.00
   5  -1   7  728.73   26.40
  -5  -1  -7  731.33   27.80
   5  -1   7  750.82   29.70
   5  -1   7  709.83   27.60
   5   1   7  698.23   28.30
   5   1   7  747.03   29.70
  -5   1  -7  775.02   29.50
   7  -1   7  647.84   27.00
   7  -1   7  732.33   29.20
  -7  -1  -7  693.33   27.70
   7   1   7  671.43   26.80
   7   1   7  707.83   28.20
  -7   1  -7  720.43   29.20
   7   1   7  688.53   28.70
  -9  -1  -7  452.85   21.80
   9  -1   7  437.16   21.10
   9  -1   7  468.15   22.10
   9   1   7  431.86   21.40
   9   1   7  466.65   22.20
  -9   1  -7  452.95   22.70
 -11  -1  -7  291.07   14.20
 -11  -1  -7  275.97   17.10
  11  -1   7  280.97   16.70
  11   1   7  252.87   23.70
 -11   1  -7  256.37   17.30
  11   1   7  256.57   16.30
 -13  -1  -7   51.29    9.90
 -13  -1  -7   46.00    5.50
  13  -1   7   55.59    9.60
  13  -1   7   70.89   10.80
  13   1   7   56.59    9.10
  13   1   7   71.99   11.00
 -13   1  -7   44.10    9.00
 -15  -1  -7    1.40    2.60
  15  -1   7    1.30    4.20
 -15  -1  -7    6.10    6.00
  15  -1   7   13.10    5.70
 -15   1  -7   -2.90    3.60
  15   1   7   -0.90    4.00
  15   1   7   -0.80    3.40
 -17  -1  -7  822.82   30.50
 -17  -1  -7  933.01   40.00
  17  -1   7  901.51   36.80
  17  -1   7  889.91   35.60
  17   1   7  857.11   36.10
 -17   1  -7  863.11   39.90
  17   1   7  927.51   35.80
 -17   1  -7  879.21   30.90
 -20  -2   7   29.90    4.90
 -20  -2   7   41.30    8.60
 -20  -2   7   37.40    4.90
 -20  -2   7   35.90    5.20
 -20   2   7   31.60    4.60
 -20   2   7   39.50    3.80
 -18  -2   7   36.70    7.30
 -18  -2   7   29.40    5.40
 -18  -2   7   41.40    4.80
 -18  -2   7   37.20    5.20
 -18   2   7   45.00    4.70
 -18   2   7   44.30    4.10
 -16  -2   7  349.96   14.00
 -16  -2   7  360.96   15.30
 -16  -2   7  302.87   14.80
 -16  -2   7  340.87   18.20
 -16  -2   7  374.56   14.30
 -16   2   7  373.56   14.60
 -16   2   7  357.36   13.70
 -16   2   7  352.16   13.30
 -14  -2   7  305.67   13.30
 -14  -2   7  291.07   15.80
 -14  -2   7  293.17   13.50
 -14  -2   7  326.07   13.90
 -14  -2   7  299.07   12.40
 -14   2   7  322.37   14.00
 -14   2   7  298.57   11.90
 -14   2   7  299.77   11.90
 -12  -2   7  380.66   14.40
 -12  -2   7  383.36   15.90
 -12  -2   7  390.06   16.50
 -12  -2   7  401.56   17.90
 -12   2   7  375.76   14.20
 -12   2   7  386.76   16.90
 -12   2   7  379.26   13.80
 -10  -2   7    4.30    2.60
 -10  -2   7    4.70    3.00
 -10  -2   7   12.10    3.00
 -10  -2   7   19.20    4.70
  -8  -2   7  162.58    8.60
  -8  -2   7  173.68    8.00
  -8  -2   7  188.28   11.30
  -8  -2   7  170.28    9.40
  -8  -2   7  186.48   10.10
  -8   2   7  182.78   11.40
  -6  -2   7  804.42   28.00
  -6  -2   7  829.22   30.10
  -6  -2   7  846.32   26.10
  -6  -2   7  797.92   27.20
  -6  -2   7  844.62   26.70
  -6   2   7  816.02   29.90
  -4  -2   7 1332.77   40.00
  -4  -2   7 1372.76   41.40
  -4  -2   7 1362.06   40.10
  -4  -2   7 1293.57   43.60
  -4   2   7 1306.57   37.50
  -4   2   7 1308.87   43.40
  -2  -2   7  501.95   18.70
  -2  -2   7  445.56   20.30
  -2  -2   7  453.65   17.60
   2   2  -7  482.45   20.10
  -2   2   7  416.76   14.60
   2   2  -7  425.96   17.40
  -2   2   7  449.36   15.60
  -2   2   7  452.35   20.00
   0  -2   7  320.37   14.30
   0  -2   7  291.97   16.00
   0  -2   7  299.07   14.10
   0  -2  -7  305.77   14.60
   0   2   7  311.37   16.10
   0   2  -7  329.87   16.40
   0   2   7  301.07   12.30
  -2  -2  -7  285.87   12.80
   2  -2   7  247.68   14.90
   2  -2   7  263.57   13.20
   2  -2   7  277.27   13.80
  -2   2  -7  253.77   16.20
   2   2   7  253.57   11.50
   2   2   7  280.07   15.30
   4  -2   7 1723.83   53.99
   4  -2   7 1714.73   56.69
   4  -2   7 1746.13   54.59
  -4  -2  -7 1838.82   54.19
   4   2   7 1789.22   56.89
  -4   2  -7 1816.52   57.59
   4   2   7 1755.82   52.09
   6  -2   7 1353.66   45.70
  -6  -2  -7 1450.85   46.00
   6  -2   7 1391.76   47.80
  -6   2  -7 1443.36   48.80
   6   2   7 1353.06   43.00
   8  -2   7  454.05   22.20
   8  -2   7  456.45   21.10
  -8  -2  -7  478.15   21.60
  -8   2  -7  456.95   23.20
 -10  -2  -7  140.09   11.70
  10  -2   7  140.99   11.30
 -10  -2  -7  136.19    8.20
  10  -2   7  137.29   11.90
  10   2   7  141.79   11.90
  10   2   7  126.89   11.60
 -10   2  -7  161.78   13.60
 -12  -2  -7  449.26   23.10
 -12  -2  -7  414.26   17.30
  12  -2   7  475.45   22.90
  12  -2   7  414.96   21.60
  12   2   7  442.26   22.30
  12   2   7  440.16   22.40
 -12   2  -7  471.35   25.10
 -14  -2  -7  484.25   18.90
  14  -2   7  429.26   24.90
  14  -2   7  446.76   22.90
 -14  -2  -7  506.45   25.50
 -14   2  -7  450.55   25.80
  14   2   7  432.66   22.90
  14   2   7  479.65   34.20
  16  -2   7  483.55   23.70
 -16  -2  -7  481.75   26.60
  16  -2   7  445.46   23.80
 -16  -2  -7  434.16   19.00
  16   2   7  496.55   24.70
  16   2   7  461.85   23.40
 -16   2  -7  470.75   27.30
 -18  -2  -7   79.09    7.90
  18  -2   7   92.39   13.30
  18  -2   7   93.99   10.50
 -18  -2  -7  105.39   12.80
  18   2   7   88.39   10.90
 -18   2  -7   90.19   14.20
  18   2   7   91.69   10.60
 -21  -3   7   32.30    8.60
 -21  -3   7   44.80    5.90
 -21  -3   7   42.40    6.20
 -21  -3   7   53.59    6.30
 -21   3   7   39.30    5.10
 -19  -3   7  123.49    8.50
 -19  -3   7  130.99    9.00
 -19  -3   7  113.09   11.30
 -19  -3   7  115.89   10.00
 -19   3   7  125.29    7.20
 -17  -3   7   99.49    8.00
 -17  -3   7  107.49    7.60
 -17  -3   7   98.39   10.40
 -17  -3   7  109.89    8.00
 -17   3   7  112.39    6.50
 -17   3   7  103.79    8.00
 -17   3   7  118.99    6.10
 -15  -3   7  494.25   23.80
 -15  -3   7  490.15   19.40
 -15  -3   7  503.85   20.20
 -15  -3   7  502.55   19.20
 -15  -3   7  538.65   19.90
 -15   3   7  544.75   17.50
 -15   3   7  538.95   17.60
 -13  -3   7  359.16   14.70
 -13  -3   7  345.07   15.30
 -13  -3   7  377.06   16.00
 -13  -3   7  315.27   18.00
 -13   3   7  361.16   12.80
 -13   3   7  344.47   13.00
 -11  -3   7   36.00    6.20
 -11  -3   7   29.10    4.90
 -11  -3   7   39.20    5.90
 -11  -3   7   42.60    7.50
  -9  -3   7  236.38   13.20
  -9  -3   7  259.37   13.60
  -9  -3   7  240.58   11.50
  -9  -3   7  246.08   12.00
  -7  -3   7  460.65   17.60
  -7  -3   7  448.26   19.10
  -7  -3   7  475.35   15.70
  -7  -3   7  425.76   17.60
  -7  -3   7  467.15   19.90
  -7   3   7  440.46   20.60
  -5  -3   7  313.67   14.50
  -5  -3   7  364.56   13.70
  -5  -3   7  375.86   17.60
  -5  -3   7  373.26   15.40
  -5  -3   7  378.96   16.40
   5   3  -7  353.06   16.90
  -5   3   7  347.57   12.00
  -5   3   7  346.97   11.90
  -5   3   7  377.46   18.20
  -3  -3   7  828.42   27.90
  -3  -3   7  819.92   26.60
  -3  -3   7  825.22   28.80
  -3  -3   7  810.92   30.50
  -3   3   7  803.42   30.80
   3   3  -7  811.92   31.00
  -3   3   7  805.32   23.80
  -3   3   7  787.22   24.60
  -1  -3   7  199.88   13.20
  -1  -3   7  236.18   11.40
  -1  -3   7  217.48   12.10
  -1   3   7  224.78   13.90
   1   3  -7  201.88   10.70
  -1   3   7  214.18    8.50
   1   3  -7  244.18   14.80
  -1   3   7  234.58    9.90
   1  -3   7   92.39    7.40
   1  -3   7   92.89    9.00
   1  -3   7   94.19    7.60
  -1  -3  -7   87.89    6.10
   1   3   7   97.29    6.20
   1   3   7   80.19    8.60
   3  -3   7  563.84   22.40
   3  -3   7  549.35   22.80
   3  -3   7  589.64   25.20
  -3  -3  -7  587.24   21.70
  -3   3  -7  575.04   26.00
   3   3   7  575.04   20.60
   3   3   7  580.24   25.10
  -5  -3  -7  394.26   17.50
   5  -3   7  385.96   17.80
   5  -3   7  376.56   19.50
  -5   3  -7  371.86   20.40
   5   3   7  367.66   19.40
  -7  -3  -7  386.96   18.40
   7  -3   7  374.86   19.80
   7  -3   7  356.96   18.10
  -7   3  -7  393.66   21.50
   7   3   7  393.06   20.10
  -9  -3  -7  527.45   23.70
   9  -3   7  530.85   24.70
   9  -3   7  530.75   23.60
  -9  -3  -7  512.95   19.10
  -9   3  -7  540.95   26.90
   9   3   7  539.45   24.80
  11  -3   7   13.90    5.60
  11  -3   7   24.00    6.90
 -11  -3  -7   28.50    5.60
 -11  -3  -7   47.90    9.30
  11   3   7   36.30    8.60
 -11   3  -7   22.30    7.20
  13  -3   7  119.69   11.40
  13  -3   7  112.39   11.00
 -13  -3  -7   87.29   10.30
 -13  -3  -7  109.59    7.90
  13   3   7  106.19   17.00
 -13   3  -7  107.09   12.90
  13   3   7  100.89   11.00
 -15  -3  -7  432.86   24.20
  15  -3   7  422.66   22.60
  15  -3   7  462.45   23.70
 -15  -3  -7  444.46   18.50
  15   3   7  446.16   23.30
  15   3   7  475.65   23.60
 -15   3  -7  426.36   26.20
 -17  -3  -7  147.09   10.10
  17  -3   7  156.08   13.90
  17  -3   7  171.88   14.00
 -17  -3  -7  160.98   14.80
[truncated: 82,182 more chars]
