# Supplementary material
Source: MDPI journal article supplement (https://www.mdpi.com/2624-8549/5/2/65)
Supplement: s1 [file s1 › Cammiade_AC82_Mg-DMT.cif]

data_mo_cammiade_ac82_0m_5
_publ_section_references
;
Sheldrick, G.M. (2015). Acta Cryst. A71, 3-8.
Sheldrick, G.M. (2015). Acta Cryst. C71, 3-8.
;
_audit_contact_author_name        ?
_audit_contact_author_email       ?
_audit_contact_author_address     ?
_audit_contact_author_phone       ?
_publ_contact_author_id_orcid     ?
_audit_creation_method
;
FinalCif V86 by Daniel Kratzert, Freiburg 2021,
https://github.com/dkratzert/FinalCif
;
_shelx_SHELXL_version_number      '2018/3'
_chemical_name_systematic         ?
_chemical_name_common             ?
_chemical_formula_sum             'C26 H30 Mg2 N2 O14'
_chemical_formula_moiety          ?
_chemical_formula_weight          643.14
_chemical_melting_point           ?
_space_group_crystal_system       triclinic
_space_group_IT_number            2
_space_group_name_H-M_alt         'P -1'
_space_group_name_Hall            '-P 1'
_shelx_space_group_comment
;
The symmetry employed for this shelxl refinement is uniquely defined
by the following loop, which should always be used as a source of
symmetry information in preference to the above space-group names.
They are only intended as comments.
;

loop_
_space_group_symop_operation_xyz
'x, y, z'
'-x, -y, -z'

_cell_length_a                    8.833(3)
_cell_length_b                    9.691(3)
_cell_length_c                    18.674(6)
_cell_angle_alpha                 98.274(7)
_cell_angle_beta                  93.305(10)
_cell_angle_gamma                 107.308(9)
_cell_volume                      1501.6(8)
_cell_formula_units_Z             2
_cell_measurement_temperature     100(2)
_cell_measurement_reflns_used     5023
_cell_measurement_theta_min       2.2185
_cell_measurement_theta_max       25.3035
_exptl_crystal_description        block
_exptl_crystal_colour             colourless
_exptl_crystal_recrystallization_method ?
_exptl_crystal_density_meas       ?
_exptl_crystal_density_method     ?
_exptl_crystal_density_diffrn     1.422
_exptl_crystal_F_000              672
_exptl_crystal_size_max           0.110
_exptl_crystal_size_mid           0.110
_exptl_crystal_size_min           0.070
_exptl_absorpt_coefficient_mu     0.152
_exptl_absorpt_correction_type    multi-scan
_exptl_absorpt_correction_T_min   0.667278
_exptl_absorpt_correction_T_max   0.742875
_exptl_absorpt_process_details
;
TWINABS - Bruker AXS scaling for twinned crystals - Version 2012/1: Krause, L.,
Herbst-Irmer, R., Sheldrick G.M. & Stalke D., J. Appl. Cryst. 48 (2015) 3-10
;
_exptl_absorpt_special_details    ?
_shelx_estimated_absorpt_T_min    0.983
_shelx_estimated_absorpt_T_max    0.989
_exptl_transmission_factor_min    0.667278
_exptl_transmission_factor_max    0.742875
_exptl_special_details            ?
_diffrn_ambient_temperature       100(2)
_diffrn_ambient_environment       N~2~
_diffrn_radiation_type            MoK\a
_diffrn_radiation_wavelength      0.71073
_diffrn_radiation_monochromator   'multilayer mirror'
_olex2_diffrn_ambient_temperature_device 'Oxford Cryostream 800'
_diffrn_radiation_probe           x-ray
_diffrn_source                    'microfocus sealed tube'
_diffrn_source_type               'INCOATEC I\mS 3.0'
_diffrn_source_voltage            ?
_diffrn_source_current            ?
_diffrn_detector                  CPAD
_diffrn_detector_type             'Bruker PHOTON III'
_diffrn_detector_area_resol_mean  7.41
_diffrn_measurement_device        'KAPPA diffractometer'
_diffrn_measurement_device_type   'Bruker D8 VENTURE'
_diffrn_measurement_method        '\w and \f scans'
_diffrn_measurement_specimen_support 'MiTeGen micromount'
_diffrn_reflns_number             5584
_diffrn_reflns_av_unetI/netI      0.0954
_diffrn_reflns_av_R_equivalents   0.0992
_diffrn_reflns_theta_min          2.217
_diffrn_reflns_theta_max          25.392
_diffrn_reflns_theta_full         25.242
_diffrn_reflns_limit_h_min        -10
_diffrn_reflns_limit_h_max        10
_diffrn_reflns_limit_k_min        -11
_diffrn_reflns_limit_k_max        11
_diffrn_reflns_limit_l_min        0
_diffrn_reflns_limit_l_max        22
_diffrn_measured_fraction_theta_max 0.999
_diffrn_measured_fraction_theta_full 1.000
_diffrn_reflns_Laue_measured_fraction_max 0.999
_diffrn_reflns_Laue_measured_fraction_full 1.000
_diffrn_reflns_point_group_measured_fraction_max 0.999
_diffrn_reflns_point_group_measured_fraction_full 1.000
_reflns_number_total              5584
_reflns_number_gt                 3996
_reflns_threshold_expression      'I > 2\s(I)'
_reflns_Friedel_coverage          0.000
_reflns_Friedel_fraction_max      .
_reflns_Friedel_fraction_full     .
_reflns_special_details
;
 _reflns_Friedel_fraction is defined as the number of unique
 Friedel pairs measured divided by the number that would be
 possible theoretically, ignoring centric projections and
 systematic absences. Completness statistics refer to single and
 composite reflections containing twin component 1 only.
;
_computing_data_collection        ?
_computing_cell_refinement        'SAINT V8.40B'
_computing_data_reduction         'SAINT V8.40B'
_computing_structure_solution     'SHELXT 2018/2'
_computing_structure_refinement   'SHELXL-2018/3 (Sheldrick, 2018)'
_computing_molecular_graphics     ?
_computing_publication_material   ?
_refine_special_details
;
 Refined as a 2-component twin.
;
_refine_ls_structure_factor_coef  Fsqd
_refine_ls_matrix_type            full
_refine_ls_weighting_scheme       calc
_refine_ls_weighting_details      'w=1/[\s^2^(Fo^2^)+(0.0461P)^2^+3.5654P] where P=(Fo^2^+2Fc^2^)/3'
_atom_sites_solution_primary      direct
_atom_sites_solution_secondary    difmap
_atom_sites_solution_hydrogens    geom
_refine_ls_hydrogen_treatment     constr
_refine_ls_number_reflns          5584
_refine_ls_number_parameters      407
_refine_ls_number_restraints      0
_refine_ls_R_factor_all           0.1208
_refine_ls_R_factor_gt            0.0744
_refine_ls_wR_factor_ref          0.1659
_refine_ls_wR_factor_gt           0.1448
_refine_ls_goodness_of_fit_ref    1.032
_refine_ls_restrained_S_all       1.032
_refine_ls_shift/su_max           0.000
_refine_ls_shift/su_mean          0.000
_refine_diff_density_max          1.357
_refine_diff_density_min          -0.795
_refine_diff_density_rms          0.102
_refine_ls_extinction_method      'SHELXL-2018/3 (Sheldrick 2018)'
_refine_ls_extinction_coef        0.0093(15)
_refine_ls_extinction_expression  'Fc^*^=kFc[1+0.001xFc^2^\l^3^/sin(2\q)]^-1/4^'
_twin_special_details             'The data was integrated as a 2-component twin.'
_twin_individual_id               2
_twin_individual_twin_matrix_11   0.02605
_twin_individual_twin_matrix_12   0.02669
_twin_individual_twin_matrix_13   1.00999
_twin_individual_twin_matrix_21   0.99838
_twin_individual_twin_matrix_22   0.01574
_twin_individual_twin_matrix_23   -0.01957
_twin_individual_twin_matrix_31   -0.10494
_twin_individual_twin_matrix_32   0.98582
_twin_individual_twin_matrix_33   -0.14184

loop_
_atom_type_symbol
_atom_type_description
_atom_type_scat_dispersion_real
_atom_type_scat_dispersion_imag
_atom_type_scat_source
'C' 'C' 0.0033 0.0016 'International Tables Vol C Tables 4.2.6.8 and 6.1.1.4'
'H' 'H' 0.0000 0.0000 'International Tables Vol C Tables 4.2.6.8 and 6.1.1.4'
'Mg' 'Mg' 0.0486 0.0363 'International Tables Vol C Tables 4.2.6.8 and 6.1.1.4'
'N' 'N' 0.0061 0.0033 'International Tables Vol C Tables 4.2.6.8 and 6.1.1.4'
'O' 'O' 0.0106 0.0060 'International Tables Vol C Tables 4.2.6.8 and 6.1.1.4'

_geom_special_details
;
 All esds (except the esd in the dihedral angle between two l.s. planes)
 are estimated using the full covariance matrix.  The cell esds are taken
 into account individually in the estimation of esds in distances, angles
 and torsion angles; correlations between esds in cell parameters are only
 used when they are defined by crystal symmetry.  An approximate (isotropic)
 treatment of cell esds is used for estimating esds involving l.s. planes.
;

loop_
_atom_site_label
_atom_site_type_symbol
_atom_site_fract_x
_atom_site_fract_y
_atom_site_fract_z
_atom_site_U_iso_or_equiv
_atom_site_adp_type
_atom_site_occupancy
_atom_site_site_symmetry_order
_atom_site_calc_flag
_atom_site_refinement_flags_posn
_atom_site_refinement_flags_adp
_atom_site_refinement_flags_occupancy
_atom_site_disorder_assembly
_atom_site_disorder_group
Mg1 Mg 1.28711(18) 0.84237(15) 0.76918(7) 0.0123(3) Uani 1 1 d . . . . .
Mg2 Mg 0.92300(19) 0.92400(16) 0.73244(7) 0.0126(3) Uani 1 1 d . . . . .
O11 O 1.0725(4) 0.8789(3) 0.81136(15) 0.0141(7) Uani 1 1 d . . . . .
O2 O 1.7320(4) 0.7788(3) 0.76563(16) 0.0142(7) Uani 1 1 d . . . . .
O10 O 1.2937(4) 0.9218(3) 0.88147(16) 0.0190(7) Uani 1 1 d . . . . .
O1 O 1.5079(4) 0.8396(3) 0.76677(16) 0.0161(7) Uani 1 1 d . . . . .
O7 O 1.1808(4) 0.7121(3) 0.67639(16) 0.0181(7) Uani 1 1 d . . . . .
O4 O 1.3446(4) 0.0415(3) 0.74011(17) 0.0196(7) Uani 1 1 d . . . . .
O3 O 1.1154(4) 0.0756(3) 0.70326(16) 0.0178(7) Uani 1 1 d . . . . .
O5 O 1.2646(4) 0.6227(3) 0.80570(16) 0.0159(7) Uani 1 1 d . . . . .
O13 O 0.9013(4) 1.0999(3) 0.80496(17) 0.0205(7) Uani 1 1 d . . . . .
O8 O 0.9484(4) 0.7534(3) 0.65768(16) 0.0163(7) Uani 1 1 d . . . . .
O14 O 0.7620(4) 0.9522(3) 0.65234(16) 0.0192(7) Uani 1 1 d . . . . .
O6 O 1.5759(4) 0.2441(3) 0.67862(19) 0.0232(8) Uani 1 1 d . . . . .
O9 O 0.9535(4) 0.7717(3) 0.50636(16) 0.0223(8) Uani 1 1 d . . . . .
O12 O 0.6802(4) 0.8540(4) 1.00435(17) 0.0257(8) Uani 1 1 d . . . . .
N2 N 0.5516(5) 0.8277(4) 0.5674(2) 0.0241(9) Uani 1 1 d . . . . .
N1 N 0.7570(5) 1.2173(4) 0.8733(2) 0.0211(9) Uani 1 1 d . . . . .
C16 C 0.9143(6) 0.9026(5) 0.9391(2) 0.0181(10) Uani 1 1 d . . . . .
H16 H 0.854963 0.837360 0.897116 0.022 Uiso 1 1 calc R U . . .
C17 C 0.8375(6) 0.9275(5) 1.0006(2) 0.0166(10) Uani 1 1 d . . . . .
C15 C 1.0769(6) 0.9719(5) 0.9383(2) 0.0160(10) Uani 1 1 d . . . . .
C19 C 0.5810(8) 0.7898(11) 0.9393(3) 0.082(3) Uani 1 1 d . . . . .
H19A H 0.469899 0.755559 0.949903 0.124 Uiso 1 1 calc R U . . .
H19B H 0.611617 0.706477 0.915661 0.124 Uiso 1 1 calc R U . . .
H19C H 0.592279 0.862387 0.906834 0.124 Uiso 1 1 calc R U . . .
C18 C 1.1534(5) 0.9256(5) 0.8740(2) 0.0130(9) Uani 1 1 d . . . . .
C7 C 1.5840(6) 0.7476(5) 0.7624(2) 0.0133(9) Uani 1 1 d . . . . .
C1 C 1.4920(5) 0.5866(4) 0.7513(2) 0.0131(9) Uani 1 1 d . . . . .
C2 C 1.3380(5) 0.5274(5) 0.7707(2) 0.0119(9) Uani 1 1 d . . . . .
C3 C 1.2665(6) 0.3761(5) 0.7577(2) 0.0140(9) Uani 1 1 d . . . . .
H3 H 1.161207 0.336589 0.769972 0.017 Uiso 1 1 calc R U . . .
C4 C 1.3455(6) 0.2814(5) 0.7272(2) 0.0154(9) Uani 1 1 d . . . . .
C5 C 1.4997(6) 0.3404(5) 0.7091(2) 0.0174(10) Uani 1 1 d . . . . .
C6 C 1.5713(6) 0.4912(5) 0.7205(2) 0.0168(10) Uani 1 1 d . . . . .
H6 H 1.675823 0.530282 0.707255 0.020 Uiso 1 1 calc R U . . .
C14 C 1.0529(6) 0.6971(5) 0.6389(2) 0.0142(10) Uani 1 1 d . . . . .
C11 C 1.0241(5) 0.5970(5) 0.5661(2) 0.0140(9) Uani 1 1 d . . . . .
C13 C 1.0546(6) 0.4639(5) 0.5638(2) 0.0145(9) Uani 1 1 d . . . . .
H13 H 1.093827 0.439560 0.607149 0.017 Uiso 1 1 calc R U . . .
C12 C 0.9717(5) 0.6347(5) 0.5015(2) 0.0143(9) Uani 1 1 d . . . . .
C8 C 1.2618(6) 0.1184(4) 0.7218(2) 0.0131(9) Uani 1 1 d . . . . .
C9 C 1.1254(7) 0.5577(6) 0.8392(3) 0.0386(15) Uani 1 1 d . . . . .
H9A H 1.147751 0.490368 0.869751 0.058 Uiso 1 1 calc R U . . .
H9B H 1.037712 0.503458 0.801525 0.058 Uiso 1 1 calc R U . . .
H9C H 1.095264 0.634760 0.869412 0.058 Uiso 1 1 calc R U . . .
C20 C 0.7758(6) 1.1318(5) 0.8145(2) 0.0183(10) Uani 1 1 d . . . . .
H20 H 0.688917 1.092511 0.777427 0.022 Uiso 1 1 calc R U . . .
C22 C 0.8802(7) 1.2748(5) 0.9344(3) 0.0259(12) Uani 1 1 d . . . . .
H22A H 0.907147 1.381842 0.945045 0.039 Uiso 1 1 calc R U . . .
H22B H 0.975420 1.248105 0.922177 0.039 Uiso 1 1 calc R U . . .
H22C H 0.841239 1.233288 0.977161 0.039 Uiso 1 1 calc R U . . .
C23 C 0.6919(7) 0.8480(6) 0.6022(3) 0.0285(12) Uani 1 1 d . . . . .
H23 H 0.744683 0.777617 0.588264 0.034 Uiso 1 1 calc R U . . .
C25 C 0.4542(7) 0.9205(6) 0.5866(3) 0.0333(13) Uani 1 1 d . . . . .
H25A H 0.346367 0.859528 0.592085 0.050 Uiso 1 1 calc R U . . .
H25B H 0.449145 0.978485 0.548161 0.050 Uiso 1 1 calc R U . . .
H25C H 0.500881 0.986399 0.632579 0.050 Uiso 1 1 calc R U . . .
C10 C 1.7393(6) 0.3037(5) 0.6680(3) 0.0284(12) Uani 1 1 d . . . . .
H10A H 1.781862 0.223881 0.650535 0.043 Uiso 1 1 calc R U . . .
H10B H 1.799690 0.359054 0.714187 0.043 Uiso 1 1 calc R U . . .
H10C H 1.748715 0.369104 0.631930 0.043 Uiso 1 1 calc R U . . .
C26 C 0.9078(7) 0.8147(5) 0.4403(2) 0.0270(12) Uani 1 1 d . . . . .
H26A H 0.892490 0.911296 0.451341 0.041 Uiso 1 1 calc R U . . .
H26B H 0.807946 0.742725 0.416545 0.041 Uiso 1 1 calc R U . . .
H26C H 0.991633 0.819435 0.407690 0.041 Uiso 1 1 calc R U . . .
C21 C 0.6065(7) 1.2492(6) 0.8809(3) 0.0370(14) Uani 1 1 d . . . . .
H21A H 0.627013 1.355640 0.890158 0.055 Uiso 1 1 calc R U . . .
H21B H 0.556955 1.206872 0.921612 0.055 Uiso 1 1 calc R U . . .
H21C H 0.534723 1.206527 0.835919 0.055 Uiso 1 1 calc R U . . .
C24 C 0.4817(8) 0.7024(7) 0.5088(3) 0.0490(18) Uani 1 1 d . . . . .
H24A H 0.377863 0.643924 0.520540 0.073 Uiso 1 1 calc R U . . .
H24B H 0.552741 0.641560 0.503658 0.073 Uiso 1 1 calc R U . . .
H24C H 0.467853 0.737801 0.463052 0.073 Uiso 1 1 calc R U . . .

loop_
_atom_site_aniso_label
_atom_site_aniso_U_11
_atom_site_aniso_U_22
_atom_site_aniso_U_33
_atom_site_aniso_U_23
_atom_site_aniso_U_13
_atom_site_aniso_U_12
Mg1 0.0116(9) 0.0120(7) 0.0125(7) -0.0001(5) 0.0019(6) 0.0032(6)
Mg2 0.0121(8) 0.0114(7) 0.0132(7) 0.0003(5) 0.0014(6) 0.0027(6)
O11 0.0142(18) 0.0139(15) 0.0113(15) -0.0011(11) 0.0016(12) 0.0015(13)
O2 0.0073(18) 0.0138(15) 0.0195(16) 0.0018(12) 0.0001(12) 0.0010(13)
O10 0.018(2) 0.0253(18) 0.0141(16) -0.0021(13) 0.0022(13) 0.0090(15)
O1 0.0156(18) 0.0131(16) 0.0211(16) 0.0034(12) 0.0042(13) 0.0059(14)
O7 0.019(2) 0.0193(17) 0.0163(16) -0.0023(12) -0.0041(14) 0.0096(14)
O4 0.019(2) 0.0122(16) 0.0281(18) 0.0037(13) 0.0042(14) 0.0043(14)
O3 0.017(2) 0.0170(17) 0.0171(16) 0.0046(12) 0.0003(13) 0.0004(14)
O5 0.0149(18) 0.0136(16) 0.0215(16) 0.0038(12) 0.0073(13) 0.0063(14)
O13 0.022(2) 0.0152(16) 0.0238(17) -0.0012(13) 0.0011(14) 0.0071(15)
O8 0.0133(19) 0.0194(17) 0.0155(16) -0.0025(12) 0.0002(13) 0.0069(14)
O14 0.024(2) 0.0171(17) 0.0167(16) 0.0020(13) 0.0009(14) 0.0066(15)
O6 0.016(2) 0.0133(17) 0.041(2) 0.0025(14) 0.0125(15) 0.0057(14)
O9 0.039(2) 0.0160(17) 0.0154(16) -0.0001(12) -0.0051(14) 0.0164(16)
O12 0.014(2) 0.036(2) 0.0177(17) -0.0052(14) 0.0025(14) -0.0020(16)
N2 0.022(3) 0.025(2) 0.025(2) -0.0015(17) -0.0017(18) 0.0091(19)
N1 0.020(2) 0.023(2) 0.019(2) -0.0002(16) 0.0041(17) 0.0058(18)
C16 0.021(3) 0.021(2) 0.011(2) -0.0038(17) -0.0019(18) 0.008(2)
C17 0.014(3) 0.023(2) 0.013(2) 0.0056(18) 0.0038(18) 0.004(2)
C15 0.023(3) 0.016(2) 0.010(2) 0.0009(16) 0.0026(18) 0.007(2)
C19 0.026(4) 0.163(9) 0.028(4) 0.004(4) -0.005(3) -0.010(5)
C18 0.009(3) 0.013(2) 0.017(2) 0.0009(17) 0.0012(18) 0.0034(18)
C7 0.015(3) 0.013(2) 0.011(2) 0.0006(16) 0.0027(17) 0.0033(19)
C1 0.013(3) 0.010(2) 0.015(2) 0.0003(16) -0.0020(17) 0.0024(18)
C2 0.012(2) 0.014(2) 0.013(2) 0.0032(16) 0.0010(17) 0.0088(18)
C3 0.011(2) 0.014(2) 0.017(2) 0.0051(17) 0.0032(18) 0.0022(18)
C4 0.012(3) 0.013(2) 0.020(2) 0.0031(17) 0.0024(18) 0.0014(19)
C5 0.016(3) 0.011(2) 0.025(2) 0.0010(18) 0.0043(19) 0.004(2)
C6 0.009(3) 0.014(2) 0.026(2) 0.0041(18) 0.0022(19) 0.0003(19)
C14 0.020(3) 0.009(2) 0.012(2) 0.0006(16) 0.0009(19) 0.0022(19)
C11 0.014(3) 0.017(2) 0.010(2) -0.0029(16) 0.0025(17) 0.0049(19)
C13 0.018(3) 0.016(2) 0.010(2) 0.0014(16) -0.0007(17) 0.008(2)
C12 0.014(3) 0.014(2) 0.016(2) 0.0010(17) 0.0012(18) 0.0079(19)
C8 0.013(3) 0.010(2) 0.016(2) 0.0015(16) 0.0017(18) 0.0024(19)
C9 0.039(4) 0.017(3) 0.064(4) 0.008(2) 0.037(3) 0.008(3)
C20 0.024(3) 0.011(2) 0.017(2) 0.0014(17) 0.0034(19) 0.001(2)
C22 0.033(3) 0.024(3) 0.021(2) -0.004(2) -0.003(2) 0.014(2)
C23 0.031(3) 0.032(3) 0.024(3) 0.000(2) 0.004(2) 0.014(3)
C25 0.033(4) 0.036(3) 0.034(3) 0.006(2) 0.008(2) 0.014(3)
C10 0.015(3) 0.021(3) 0.050(3) 0.005(2) 0.011(2) 0.004(2)
C26 0.047(4) 0.023(3) 0.017(2) 0.0047(19) -0.004(2) 0.021(3)
C21 0.026(3) 0.051(4) 0.034(3) -0.008(3) 0.004(2) 0.019(3)
C24 0.052(5) 0.047(4) 0.044(4) -0.015(3) -0.018(3) 0.025(3)

loop_
_geom_bond_atom_site_label_1
_geom_bond_atom_site_label_2
_geom_bond_distance
_geom_bond_site_symmetry_2
_geom_bond_publ_flag
Mg1 O1 1.961(3) . ?
Mg1 O7 1.989(3) . ?
Mg1 O4 2.007(3) 1_565 ?
Mg1 O10 2.118(3) . ?
Mg1 O11 2.198(3) . ?
Mg1 O5 2.284(3) . ?
Mg1 C18 2.501(4) . ?
Mg1 Mg2 3.585(2) . ?
Mg2 O2 2.042(4) 1_455 ?
Mg2 O3 2.048(4) 1_565 ?
Mg2 O8 2.080(3) . ?
Mg2 O13 2.082(3) . ?
Mg2 O11 2.100(3) . ?
Mg2 O14 2.107(3) . ?
O11 C18 1.282(5) . ?
O2 C7 1.247(5) . ?
O10 C18 1.251(5) . ?
O1 C7 1.264(5) . ?
O7 C14 1.253(5) . ?
O4 C8 1.256(5) . ?
O3 C8 1.245(5) . ?
O5 C2 1.390(5) . ?
O5 C9 1.429(6) . ?
O13 C20 1.251(6) . ?
O8 C14 1.247(5) . ?
O14 C23 1.253(6) . ?
O6 C5 1.383(5) . ?
O6 C10 1.423(6) . ?
O9 C12 1.375(5) . ?
O9 C26 1.432(5) . ?
O12 C17 1.371(6) . ?
O12 C19 1.402(7) . ?
N2 C23 1.312(7) . ?
N2 C25 1.443(6) . ?
N2 C24 1.464(7) . ?
N1 C20 1.326(6) . ?
N1 C22 1.453(6) . ?
N1 C21 1.462(6) . ?
C16 C17 1.394(6) . ?
C16 C15 1.395(7) . ?
C16 H16 0.9500 . ?
C17 C15 1.402(6) 2_777 ?
C15 C18 1.490(6) . ?
C19 H19A 0.9800 . ?
C19 H19B 0.9800 . ?
C19 H19C 0.9800 . ?
C7 C1 1.506(6) . ?
C1 C6 1.398(6) . ?
C1 C2 1.400(6) . ?
C2 C3 1.392(6) . ?
C3 C4 1.389(6) . ?
C3 H3 0.9500 . ?
C4 C5 1.394(7) . ?
C4 C8 1.518(6) . ?
C5 C6 1.388(6) . ?
C6 H6 0.9500 . ?
C14 C11 1.512(6) . ?
C11 C13 1.390(6) . ?
C11 C12 1.402(6) . ?
C13 C12 1.398(6) 2_766 ?
C13 H13 0.9500 . ?
C9 H9A 0.9800 . ?
C9 H9B 0.9800 . ?
C9 H9C 0.9800 . ?
C20 H20 0.9500 . ?
C22 H22A 0.9800 . ?
C22 H22B 0.9800 . ?
C22 H22C 0.9800 . ?
C23 H23 0.9500 . ?
C25 H25A 0.9800 . ?
C25 H25B 0.9800 . ?
C25 H25C 0.9800 . ?
C10 H10A 0.9800 . ?
C10 H10B 0.9800 . ?
C10 H10C 0.9800 . ?
C26 H26A 0.9800 . ?
C26 H26B 0.9800 . ?
C26 H26C 0.9800 . ?
C21 H21A 0.9800 . ?
C21 H21B 0.9800 . ?
C21 H21C 0.9800 . ?
C24 H24A 0.9800 . ?
C24 H24B 0.9800 . ?
C24 H24C 0.9800 . ?

loop_
_geom_angle_atom_site_label_1
_geom_angle_atom_site_label_2
_geom_angle_atom_site_label_3
_geom_angle
_geom_angle_site_symmetry_1
_geom_angle_site_symmetry_3
_geom_angle_publ_flag
O1 Mg1 O7 102.10(14) . . ?
O1 Mg1 O4 91.16(14) . 1_565 ?
O7 Mg1 O4 102.14(14) . 1_565 ?
O1 Mg1 O10 99.28(14) . . ?
O7 Mg1 O10 152.30(16) . . ?
O4 Mg1 O10 94.79(14) 1_565 . ?
O1 Mg1 O11 159.99(14) . . ?
O7 Mg1 O11 97.35(13) . . ?
O4 Mg1 O11 89.29(13) 1_565 . ?
O10 Mg1 O11 60.76(12) . . ?
O1 Mg1 O5 79.92(12) . . ?
O7 Mg1 O5 81.99(13) . . ?
O4 Mg1 O5 170.82(15) 1_565 . ?
O10 Mg1 O5 84.65(12) . . ?
O11 Mg1 O5 98.36(12) . . ?
O1 Mg1 C18 129.19(15) . . ?
O7 Mg1 C18 126.72(16) . . ?
O4 Mg1 C18 91.43(14) 1_565 . ?
O10 Mg1 C18 29.98(13) . . ?
O11 Mg1 C18 30.81(13) . . ?
O5 Mg1 C18 92.58(13) . . ?
O1 Mg1 Mg2 161.68(11) . . ?
O7 Mg1 Mg2 74.23(10) . . ?
O4 Mg1 Mg2 72.50(10) 1_565 . ?
O10 Mg1 Mg2 90.50(10) . . ?
O11 Mg1 Mg2 32.61(8) . . ?
O5 Mg1 Mg2 116.64(10) . . ?
C18 Mg1 Mg2 61.24(11) . . ?
O2 Mg2 O3 177.55(14) 1_455 1_565 ?
O2 Mg2 O8 89.09(13) 1_455 . ?
O3 Mg2 O8 93.22(14) 1_565 . ?
O2 Mg2 O13 92.68(14) 1_455 . ?
O3 Mg2 O13 85.02(14) 1_565 . ?
O8 Mg2 O13 178.02(16) . . ?
O2 Mg2 O11 89.09(13) 1_455 . ?
O3 Mg2 O11 90.07(14) 1_565 . ?
O8 Mg2 O11 90.13(12) . . ?
O13 Mg2 O11 90.78(13) . . ?
O2 Mg2 O14 87.24(14) 1_455 . ?
O3 Mg2 O14 93.69(14) 1_565 . ?
O8 Mg2 O14 87.36(13) . . ?
O13 Mg2 O14 91.84(13) . . ?
O11 Mg2 O14 175.58(15) . . ?
O2 Mg2 Mg1 112.29(10) 1_455 . ?
O3 Mg2 Mg1 67.99(10) 1_565 . ?
O8 Mg2 Mg1 66.60(10) . . ?
O13 Mg2 Mg1 113.44(11) . . ?
O11 Mg2 Mg1 34.34(9) . . ?
O14 Mg2 Mg1 146.20(10) . . ?
C18 O11 Mg2 145.3(3) . . ?
C18 O11 Mg1 87.7(3) . . ?
Mg2 O11 Mg1 113.05(14) . . ?
C7 O2 Mg2 140.0(3) . 1_655 ?
C18 O10 Mg1 92.2(3) . . ?
C7 O1 Mg1 138.9(3) . . ?
C14 O7 Mg1 132.4(3) . . ?
C8 O4 Mg1 132.4(3) . 1_545 ?
C8 O3 Mg2 135.2(3) . 1_545 ?
C2 O5 C9 116.5(3) . . ?
C2 O5 Mg1 120.3(3) . . ?
C9 O5 Mg1 117.4(3) . . ?
C20 O13 Mg2 126.4(3) . . ?
C14 O8 Mg2 139.6(3) . . ?
C23 O14 Mg2 119.9(3) . . ?
C5 O6 C10 117.4(4) . . ?
C12 O9 C26 117.4(3) . . ?
C17 O12 C19 118.6(4) . . ?
C23 N2 C25 122.7(4) . . ?
C23 N2 C24 120.9(4) . . ?
C25 N2 C24 116.3(4) . . ?
C20 N1 C22 121.7(4) . . ?
C20 N1 C21 120.9(4) . . ?
C22 N1 C21 117.3(4) . . ?
C17 C16 C15 121.1(4) . . ?
C17 C16 H16 119.5 . . ?
C15 C16 H16 119.5 . . ?
O12 C17 C16 122.2(4) . . ?
O12 C17 C15 118.1(4) . 2_777 ?
C16 C17 C15 119.7(4) . 2_777 ?
C16 C15 C17 119.2(4) . 2_777 ?
C16 C15 C18 117.5(4) . . ?
C17 C15 C18 123.1(4) 2_777 . ?
O12 C19 H19A 109.5 . . ?
O12 C19 H19B 109.5 . . ?
H19A C19 H19B 109.5 . . ?
O12 C19 H19C 109.5 . . ?
H19A C19 H19C 109.5 . . ?
H19B C19 H19C 109.5 . . ?
O10 C18 O11 119.2(4) . . ?
O10 C18 C15 120.4(4) . . ?
O11 C18 C15 120.2(4) . . ?
O10 C18 Mg1 57.8(2) . . ?
O11 C18 Mg1 61.4(2) . . ?
C15 C18 Mg1 177.7(3) . . ?
O2 C7 O1 125.1(4) . . ?
O2 C7 C1 116.1(4) . . ?
O1 C7 C1 118.8(4) . . ?
C6 C1 C2 118.8(4) . . ?
C6 C1 C7 115.8(4) . . ?
C2 C1 C7 125.4(4) . . ?
O5 C2 C3 122.1(4) . . ?
O5 C2 C1 118.2(4) . . ?
C3 C2 C1 119.6(4) . . ?
C4 C3 C2 121.6(4) . . ?
C4 C3 H3 119.2 . . ?
C2 C3 H3 119.2 . . ?
C3 C4 C5 118.8(4) . . ?
C3 C4 C8 116.9(4) . . ?
C5 C4 C8 124.1(4) . . ?
O6 C5 C6 122.0(4) . . ?
O6 C5 C4 117.8(4) . . ?
C6 C5 C4 120.2(4) . . ?
C5 C6 C1 121.0(4) . . ?
C5 C6 H6 119.5 . . ?
C1 C6 H6 119.5 . . ?
O8 C14 O7 125.6(4) . . ?
O8 C14 C11 118.8(4) . . ?
O7 C14 C11 115.6(4) . . ?
C13 C11 C12 119.3(4) . . ?
C13 C11 C14 117.9(4) . . ?
C12 C11 C14 122.7(4) . . ?
C11 C13 C12 120.8(4) . 2_766 ?
C11 C13 H13 119.6 . . ?
C12 C13 H13 119.6 2_766 . ?
O9 C12 C13 123.5(4) . 2_766 ?
O9 C12 C11 116.7(4) . . ?
C13 C12 C11 119.8(4) 2_766 . ?
O3 C8 O4 126.4(4) . . ?
O3 C8 C4 116.4(4) . . ?
O4 C8 C4 117.1(4) . . ?
O5 C9 H9A 109.5 . . ?
O5 C9 H9B 109.5 . . ?
H9A C9 H9B 109.5 . . ?
O5 C9 H9C 109.5 . . ?
H9A C9 H9C 109.5 . . ?
H9B C9 H9C 109.5 . . ?
O13 C20 N1 123.9(4) . . ?
O13 C20 H20 118.1 . . ?
N1 C20 H20 118.1 . . ?
N1 C22 H22A 109.5 . . ?
N1 C22 H22B 109.5 . . ?
H22A C22 H22B 109.5 . . ?
N1 C22 H22C 109.5 . . ?
H22A C22 H22C 109.5 . . ?
H22B C22 H22C 109.5 . . ?
O14 C23 N2 125.5(5) . . ?
O14 C23 H23 117.2 . . ?
N2 C23 H23 117.2 . . ?
N2 C25 H25A 109.5 . . ?
N2 C25 H25B 109.5 . . ?
H25A C25 H25B 109.5 . . ?
N2 C25 H25C 109.5 . . ?
H25A C25 H25C 109.5 . . ?
H25B C25 H25C 109.5 . . ?
O6 C10 H10A 109.5 . . ?
O6 C10 H10B 109.5 . . ?
H10A C10 H10B 109.5 . . ?
O6 C10 H10C 109.5 . . ?
H10A C10 H10C 109.5 . . ?
H10B C10 H10C 109.5 . . ?
O9 C26 H26A 109.5 . . ?
O9 C26 H26B 109.5 . . ?
H26A C26 H26B 109.5 . . ?
O9 C26 H26C 109.5 . . ?
H26A C26 H26C 109.5 . . ?
H26B C26 H26C 109.5 . . ?
N1 C21 H21A 109.5 . . ?
N1 C21 H21B 109.5 . . ?
H21A C21 H21B 109.5 . . ?
N1 C21 H21C 109.5 . . ?
H21A C21 H21C 109.5 . . ?
H21B C21 H21C 109.5 . . ?
N2 C24 H24A 109.5 . . ?
N2 C24 H24B 109.5 . . ?
H24A C24 H24B 109.5 . . ?
N2 C24 H24C 109.5 . . ?
H24A C24 H24C 109.5 . . ?
H24B C24 H24C 109.5 . . ?

loop_
_geom_torsion_atom_site_label_1
_geom_torsion_atom_site_label_2
_geom_torsion_atom_site_label_3
_geom_torsion_atom_site_label_4
_geom_torsion
_geom_torsion_site_symmetry_1
_geom_torsion_site_symmetry_2
_geom_torsion_site_symmetry_3
_geom_torsion_site_symmetry_4
_geom_torsion_publ_flag
C19 O12 C17 C16 -21.1(8) . . . . ?
C19 O12 C17 C15 160.5(6) . . . 2_777 ?
C15 C16 C17 O12 -175.9(4) . . . . ?
C15 C16 C17 C15 2.5(8) . . . 2_777 ?
C17 C16 C15 C17 -2.5(7) . . . 2_777 ?
C17 C16 C15 C18 172.7(4) . . . . ?
Mg1 O10 C18 O11 3.3(4) . . . . ?
Mg1 O10 C18 C15 178.3(4) . . . . ?
Mg2 O11 C18 O10 -132.4(4) . . . . ?
Mg1 O11 C18 O10 -3.2(4) . . . . ?
Mg2 O11 C18 C15 52.6(7) . . . . ?
Mg1 O11 C18 C15 -178.2(4) . . . . ?
Mg2 O11 C18 Mg1 -129.2(5) . . . . ?
C16 C15 C18 O10 -144.7(4) . . . . ?
C17 C15 C18 O10 30.3(7) 2_777 . . . ?
C16 C15 C18 O11 30.2(6) . . . . ?
C17 C15 C18 O11 -154.8(4) 2_777 . . . ?
Mg2 O2 C7 O1 -38.0(7) 1_655 . . . ?
Mg2 O2 C7 C1 141.3(3) 1_655 . . . ?
Mg1 O1 C7 O2 -176.3(3) . . . . ?
Mg1 O1 C7 C1 4.5(6) . . . . ?
O2 C7 C1 C6 -22.1(6) . . . . ?
O1 C7 C1 C6 157.1(4) . . . . ?
O2 C7 C1 C2 156.5(4) . . . . ?
O1 C7 C1 C2 -24.3(6) . . . . ?
C9 O5 C2 C3 10.7(6) . . . . ?
Mg1 O5 C2 C3 -142.1(3) . . . . ?
C9 O5 C2 C1 -166.1(4) . . . . ?
Mg1 O5 C2 C1 41.1(5) . . . . ?
C6 C1 C2 O5 175.7(4) . . . . ?
C7 C1 C2 O5 -2.8(6) . . . . ?
C6 C1 C2 C3 -1.2(6) . . . . ?
C7 C1 C2 C3 -179.8(4) . . . . ?
O5 C2 C3 C4 -175.5(4) . . . . ?
C1 C2 C3 C4 1.3(6) . . . . ?
C2 C3 C4 C5 -0.2(7) . . . . ?
C2 C3 C4 C8 174.7(4) . . . . ?
C10 O6 C5 C6 8.1(6) . . . . ?
C10 O6 C5 C4 -173.0(4) . . . . ?
C3 C4 C5 O6 -179.8(4) . . . . ?
C8 C4 C5 O6 5.7(7) . . . . ?
C3 C4 C5 C6 -0.9(7) . . . . ?
C8 C4 C5 C6 -175.5(4) . . . . ?
O6 C5 C6 C1 179.9(4) . . . . ?
C4 C5 C6 C1 1.1(7) . . . . ?
C2 C1 C6 C5 0.0(6) . . . . ?
C7 C1 C6 C5 178.7(4) . . . . ?
Mg2 O8 C14 O7 19.4(8) . . . . ?
Mg2 O8 C14 C11 -163.1(3) . . . . ?
Mg1 O7 C14 O8 -9.6(7) . . . . ?
Mg1 O7 C14 C11 172.9(3) . . . . ?
O8 C14 C11 C13 -132.9(5) . . . . ?
O7 C14 C11 C13 44.8(6) . . . . ?
O8 C14 C11 C12 48.5(6) . . . . ?
O7 C14 C11 C12 -133.8(5) . . . . ?
C12 C11 C13 C12 -2.3(8) . . . 2_766 ?
C14 C11 C13 C12 179.1(4) . . . 2_766 ?
C26 O9 C12 C13 -1.1(7) . . . 2_766 ?
C26 O9 C12 C11 177.0(4) . . . . ?
C13 C11 C12 O9 -175.9(4) . . . . ?
C14 C11 C12 O9 2.7(7) . . . . ?
C13 C11 C12 C13 2.3(8) . . . 2_766 ?
C14 C11 C12 C13 -179.2(4) . . . 2_766 ?
Mg2 O3 C8 O4 34.3(7) 1_545 . . . ?
Mg2 O3 C8 C4 -141.5(3) 1_545 . . . ?
Mg1 O4 C8 O3 -15.3(7) 1_545 . . . ?
Mg1 O4 C8 C4 160.5(3) 1_545 . . . ?
C3 C4 C8 O3 40.7(6) . . . . ?
C5 C4 C8 O3 -144.7(4) . . . . ?
C3 C4 C8 O4 -135.6(4) . . . . ?
C5 C4 C8 O4 39.1(6) . . . . ?
Mg2 O13 C20 N1 160.7(3) . . . . ?
C22 N1 C20 O13 -3.7(7) . . . . ?
C21 N1 C20 O13 -179.6(5) . . . . ?
Mg2 O14 C23 N2 151.9(4) . . . . ?
C25 N2 C23 O14 -4.4(8) . . . . ?
C24 N2 C23 O14 179.2(6) . . . . ?

_shelx_res_file
;
TITL mo_Cammiade_AC82_0m_4_a.res in P-1
    mo_cammiade_ac82_0m_5.res
    created by SHELXL-2018/3 at 17:25:21 on 08-Aug-2021
REM Old TITL mo_Cammiade_AC82_0m_4.hkl
REM SHELXT solution in P-1: R1 0.142, Rweak 0.029, Alpha 0.069
REM <I/s> 0.000 for 0 systematic absences, Orientation as input
REM Formula found by SHELXT: C28 Mg2 N O9
CELL 0.71073 8.8329 9.6906 18.6738 98.274 93.305 107.308
ZERR 2 0.003 0.0028 0.0062 0.007 0.01 0.009
LATT 1
SFAC C H Mg N O
UNIT 52 60 4 4 28

L.S. 10
PLAN  5
SIZE 0.07 0.11 0.11
TEMP -173.15(10)
CONF
BOND
LIST 6
fmap 2
MORE -1
BOND $H
ACTA
REM <olex2.extras>
REM <HklSrc "%.\\mo_Cammiade_AC82_0m_5.hkl">
REM </olex2.extras>

WGHT    0.046100    3.565400
EXTI    0.009330
BASF   0.48197
FVAR       0.70919
MG1   3    1.287110    0.842370    0.769179    11.00000    0.01157    0.01200 =
         0.01249   -0.00008    0.00186    0.00319
MG2   3    0.923000    0.923999    0.732437    11.00000    0.01211    0.01135 =
         0.01316    0.00028    0.00140    0.00267
O11   5    1.072458    0.878922    0.811356    11.00000    0.01417    0.01387 =
         0.01135   -0.00109    0.00164    0.00147
O2    5    1.731987    0.778782    0.765627    11.00000    0.00734    0.01381 =
         0.01953    0.00182    0.00008    0.00095
O10   5    1.293695    0.921785    0.881469    11.00000    0.01756    0.02534 =
         0.01408   -0.00207    0.00217    0.00901
O1    5    1.507857    0.839603    0.766775    11.00000    0.01561    0.01307 =
         0.02111    0.00339    0.00421    0.00585
O7    5    1.180750    0.712074    0.676392    11.00000    0.01872    0.01927 =
         0.01630   -0.00228   -0.00412    0.00962
O4    5    1.344631    0.041519    0.740105    11.00000    0.01861    0.01224 =
         0.02806    0.00370    0.00419    0.00430
O3    5    1.115436    0.075593    0.703257    11.00000    0.01655    0.01700 =
         0.01712    0.00460    0.00033    0.00040
O5    5    1.264630    0.622681    0.805702    11.00000    0.01491    0.01359 =
         0.02148    0.00383    0.00732    0.00625
O13   5    0.901252    1.099886    0.804958    11.00000    0.02172    0.01521 =
         0.02384   -0.00125    0.00112    0.00710
O8    5    0.948412    0.753388    0.657680    11.00000    0.01330    0.01943 =
         0.01549   -0.00245    0.00018    0.00692
O14   5    0.761977    0.952248    0.652344    11.00000    0.02352    0.01707 =
         0.01666    0.00196    0.00095    0.00661
O6    5    1.575863    0.244057    0.678619    11.00000    0.01591    0.01331 =
         0.04149    0.00248    0.01250    0.00565
O9    5    0.953531    0.771704    0.506355    11.00000    0.03885    0.01602 =
         0.01543   -0.00014   -0.00510    0.01641
O12   5    0.680152    0.854041    1.004353    11.00000    0.01376    0.03622 =
         0.01773   -0.00525    0.00255   -0.00204
N2    4    0.551639    0.827667    0.567353    11.00000    0.02152    0.02469 =
         0.02509   -0.00148   -0.00169    0.00912
N1    4    0.757042    1.217273    0.873265    11.00000    0.02031    0.02275 =
         0.01881   -0.00023    0.00410    0.00585
C16   1    0.914309    0.902615    0.939121    11.00000    0.02091    0.02095 =
         0.01110   -0.00380   -0.00190    0.00804
AFIX  43
H16   2    0.854963    0.837360    0.897116    11.00000   -1.20000
AFIX   0
C17   1    0.837455    0.927524    1.000566    11.00000    0.01438    0.02294 =
         0.01261    0.00559    0.00385    0.00448
C15   1    1.076909    0.971921    0.938294    11.00000    0.02256    0.01589 =
         0.00986    0.00093    0.00265    0.00681
C19   1    0.581027    0.789780    0.939292    11.00000    0.02550    0.16297 =
         0.02800    0.00442   -0.00491   -0.01036
AFIX 137
H19A  2    0.469899    0.755559    0.949903    11.00000   -1.50000
H19B  2    0.611617    0.706477    0.915661    11.00000   -1.50000
H19C  2    0.592279    0.862387    0.906834    11.00000   -1.50000
AFIX   0
C18   1    1.153449    0.925566    0.874009    11.00000    0.00856    0.01295 =
         0.01686    0.00090    0.00119    0.00338
C7    1    1.584002    0.747558    0.762357    11.00000    0.01518    0.01311 =
         0.01063    0.00065    0.00266    0.00326
C1    1    1.491967    0.586622    0.751342    11.00000    0.01262    0.01000 =
         0.01489    0.00033   -0.00198    0.00239
C2    1    1.338033    0.527357    0.770662    11.00000    0.01222    0.01436 =
         0.01251    0.00317    0.00100    0.00878
C3    1    1.266524    0.376052    0.757681    11.00000    0.01114    0.01405 =
         0.01659    0.00514    0.00316    0.00222
AFIX  43
H3    2    1.161207    0.336589    0.769972    11.00000   -1.20000
AFIX   0
C4    1    1.345486    0.281399    0.727186    11.00000    0.01170    0.01310 =
         0.01998    0.00310    0.00240    0.00136
C5    1    1.499736    0.340378    0.709094    11.00000    0.01632    0.01105 =
         0.02458    0.00098    0.00433    0.00432
C6    1    1.571316    0.491242    0.720546    11.00000    0.00865    0.01380 =
         0.02601    0.00413    0.00219    0.00027
AFIX  43
H6    2    1.675823    0.530282    0.707255    11.00000   -1.20000
AFIX   0
C14   1    1.052920    0.697111    0.638863    11.00000    0.02029    0.00884 =
         0.01159    0.00055    0.00091    0.00221
C11   1    1.024091    0.597033    0.566105    11.00000    0.01376    0.01663 =
         0.01014   -0.00294    0.00255    0.00486
C13   1    1.054586    0.463889    0.563790    11.00000    0.01833    0.01650 =
         0.00988    0.00143   -0.00067    0.00777
AFIX  43
H13   2    1.093827    0.439560    0.607149    11.00000   -1.20000
AFIX   0
C12   1    0.971740    0.634680    0.501515    11.00000    0.01405    0.01431 =
         0.01643    0.00095    0.00120    0.00789
C8    1    1.261767    0.118378    0.721774    11.00000    0.01266    0.00973 =
         0.01612    0.00150    0.00173    0.00241
C9    1    1.125401    0.557713    0.839232    11.00000    0.03922    0.01706 =
         0.06370    0.00817    0.03702    0.00842
AFIX 137
H9A   2    1.147751    0.490368    0.869751    11.00000   -1.50000
H9B   2    1.037712    0.503458    0.801525    11.00000   -1.50000
H9C   2    1.095264    0.634760    0.869412    11.00000   -1.50000
AFIX   0
C20   1    0.775846    1.131814    0.814490    11.00000    0.02392    0.01082 =
         0.01677    0.00136    0.00336    0.00061
AFIX  43
H20   2    0.688917    1.092511    0.777427    11.00000   -1.20000
AFIX   0
C22   1    0.880233    1.274807    0.934384    11.00000    0.03306    0.02389 =
         0.02067   -0.00436   -0.00347    0.01359
AFIX 137
H22A  2    0.907147    1.381842    0.945045    11.00000   -1.50000
H22B  2    0.975420    1.248105    0.922177    11.00000   -1.50000
H22C  2    0.841239    1.233288    0.977161    11.00000   -1.50000
AFIX   0
C23   1    0.691856    0.847964    0.602217    11.00000    0.03073    0.03173 =
         0.02450    0.00006    0.00405    0.01371
AFIX  43
H23   2    0.744683    0.777617    0.588264    11.00000   -1.20000
AFIX   0
C25   1    0.454194    0.920461    0.586587    11.00000    0.03293    0.03567 =
         0.03414    0.00614    0.00816    0.01387
AFIX 137
H25A  2    0.346367    0.859528    0.592085    11.00000   -1.50000
H25B  2    0.449145    0.978485    0.548161    11.00000   -1.50000
H25C  2    0.500881    0.986399    0.632579    11.00000   -1.50000
AFIX   0
C10   1    1.739257    0.303666    0.667990    11.00000    0.01460    0.02050 =
         0.04960    0.00490    0.01107    0.00371
AFIX 137
H10A  2    1.781862    0.223881    0.650535    11.00000   -1.50000
H10B  2    1.799690    0.359054    0.714187    11.00000   -1.50000
H10C  2    1.748715    0.369104    0.631930    11.00000   -1.50000
AFIX   0
C26   1    0.907792    0.814680    0.440269    11.00000    0.04683    0.02342 =
         0.01725    0.00469   -0.00358    0.02119
AFIX 137
H26A  2    0.892490    0.911296    0.451341    11.00000   -1.50000
H26B  2    0.807946    0.742725    0.416545    11.00000   -1.50000
H26C  2    0.991633    0.819435    0.407690    11.00000   -1.50000
AFIX   0
C21   1    0.606528    1.249210    0.880865    11.00000    0.02648    0.05056 =
         0.03388   -0.00811    0.00379    0.01893
AFIX 137
H21A  2    0.627013    1.355640    0.890158    11.00000   -1.50000
H21B  2    0.556955    1.206872    0.921612    11.00000   -1.50000
H21C  2    0.534723    1.206527    0.835919    11.00000   -1.50000
AFIX   0
C24   1    0.481743    0.702376    0.508809    11.00000    0.05211    0.04691 =
         0.04421   -0.01522   -0.01847    0.02491
AFIX 137
H24A  2    0.377863    0.643924    0.520540    11.00000   -1.50000
H24B  2    0.552741    0.641560    0.503658    11.00000   -1.50000
H24C  2    0.467853    0.737801    0.463052    11.00000   -1.50000
AFIX   0
HKLF 5


REM  mo_Cammiade_AC82_0m_4_a.res in P-1
REM wR2 = 0.1659, GooF = S = 1.032, Restrained GooF = 1.032 for all data
REM R1 = 0.0744 for 3996 Fo > 4sig(Fo) and 0.1208 for all 5584 data
REM 407 parameters refined using 0 restraints

END

WGHT      0.0461      3.5655

REM Highest difference peak  1.357,  deepest hole -0.795,  1-sigma level  0.102
Q1    1   0.5726  0.9027  0.9631  11.00000  0.05    1.36
Q2    1   0.6301  0.9373  0.6310  11.00000  0.05    0.67
Q3    1   1.3465  0.4375  0.9605  11.00000  0.05    0.62
Q4    1   0.6123  0.5224  0.5289  11.00000  0.05    0.46
Q5    1   0.5583  1.0218  0.9700  11.00000  0.05    0.46
;
_shelx_res_checksum               57876
_shelx_hkl_file
;
   1   0   0 107.599 3.34470   1
   2   0   0 94.3393 3.90666   1
   3   0   0 61.5729 4.45837   1
   4   0   0 232.845 8.75975   1
  -5   0   1 1441.96 40.9160  -2
   5   0   0 1441.96 40.9160   1
  -6   0   1 473.700 17.8577  -2
   6   0   0 473.700 17.8577   1
  -7   0   1 33.7536 13.6356  -2
   7   0   0 33.7536 13.6356   1
  -8   0   1 24.0161 18.4583  -2
   8   0   0 24.0161 18.4583   1
  -9   0   1 155.451 24.5099  -2
   9   0   0 155.451 24.5099   1
 -10   0   1 53.0257 43.7083  -2
  10   0   0 53.0257 43.7083   1
 -10   0   2 17.5859 70.9044  -2
  10   0   0 17.5859 70.9044   1
 -10   1   1 38.1528 30.7904  -2
 -10   1   0 38.1528 30.7904   1
  -9   1   1 49.5501 15.5635  -2
  -9   1   0 49.5501 15.5635   1
  -8   1   1 98.3342 14.3514  -2
  -8   1   0 98.3342 14.3514   1
  -7   1   1 11.1491 10.9083  -2
  -7   1   0 11.1491 10.9083   1
  -6   1   1 147.220 12.6677  -2
  -6   1   0 147.220 12.6677   1
  -5   1   0 491.358 11.4015   1
  -4   1   0 31.2142 4.95098   1
  -3   1   0 174.280 6.78508   1
  -2   1   0 981.894 38.0844  -2
  -2   1   0 981.894 38.0844   1
  -1   1   0 68.4343 3.20491  -2
  -1   1   0 68.4343 3.20491   1
   0   1   0 2502.76 25.2232   1
   1   1   0 429.086 6.50627   1
   2   1   0 92.9723 4.92988   1
   3   1   0 270.378 8.21474   1
  -4  -1   1 1303.47 49.1320  -2
   4   1   0 1303.47 49.1320   1
  -5  -1   1 458.754 16.6949  -2
   5   1   0 458.754 16.6949   1
  -6  -1   1 386.565 17.0796  -2
   6   1   0 386.565 17.0796   1
  -7  -1   1 42.0967 15.3296  -2
   7   1   0 42.0967 15.3296   1
  -8  -1   1 405.378 28.1467  -2
   8   1   0 405.378 28.1467   1
  -9  -1   1 117.353 32.2184  -2
   9   1   0 117.353 32.2184   1
 -10   2   1 -16.163 27.4791  -2
 -10   2   0 -16.163 27.4791   1
  -9   2   1 120.047 19.9131  -2
  -9   2   0 120.047 19.9131   1
  -8   2   1 50.6319 14.5018  -2
  -8   2   0 50.6319 14.5018   1
  -7   2   1 54.8104 11.7500  -2
  -7   2   0 54.8104 11.7500   1
  -6   2   1 156.075 19.6807  -2
  -6   2   0 156.075 19.6807   1
  -5   2   0 128.695 7.52221   1
  -4   2   0 760.459 61.5689  -2
  -4   2   0 760.459 61.5689   1
  -3   2   0 277.557 15.9669  -2
  -3   2   0 277.557 15.9669   1
  -2   2   0 13.2782 5.98137  -2
  -2   2   0 13.2782 5.98137   1
  -1   2   0 3175.50 96.8829  -2
  -1   2   0 3175.50 96.8829   1
   0   2   0 1659.92 71.3213  -2
   0   2   0 1659.92 71.3213   1
   1   2   0 91.5283 12.9207  -2
   1   2   0 91.5283 12.9207   1
   2   2   0 81.2197 4.02679   1
  -3  -2   1 212.513 47.1090  -2
   3   2   0 212.513 47.1090   1
  -4  -2   1 364.861 20.6942  -2
   4   2   0 364.861 20.6942   1
  -5  -2   1 239.836 12.6529  -2
   5   2   0 239.836 12.6529   1
  -6  -2   1 15.4687 10.5636  -2
   6   2   0 15.4687 10.5636   1
  -7  -2   1 37.0637 16.8577  -2
   7   2   0 37.0637 16.8577   1
  -8  -2   1 294.367 27.9843  -2
   8   2   0 294.367 27.9843   1
  -9  -2   1 340.569 61.3475  -2
   9   2   0 340.569 61.3475   1
  -9  -2   2 164.745 98.3941  -2
   9   2   0 164.745 98.3941   1
 -10   3   1 20.3264 18.7965  -2
 -10   3   0 20.3264 18.7965   1
  -9   3   1 21.5105 16.5734  -2
  -9   3   0 21.5105 16.5734   1
  -8   3   1 19.3025 12.4824  -2
  -8   3   0 19.3025 12.4824   1
  -7   3   1 159.244 19.7732  -2
  -7   3   0 159.244 19.7732   1
  -6   3   1 115.979 37.9075  -2
  -6   3   0 115.979 37.9075   1
  -5   3   0 47.9684 24.7049  -2
  -5   3   0 47.9684 24.7049   1
  -4   3   0 371.285 20.7473  -2
  -4   3   0 371.285 20.7473   1
  -3   3   0 174.815 8.76960  -2
  -3   3   0 174.815 8.76960   1
  -2   3   0 54.9177 5.55788  -2
  -2   3   0 54.9177 5.55788   1
  -1   3   0 506.330 41.5035  -2
  -1   3   0 506.330 41.5035   1
   0   3   0 405.971 6.22402   1
   1   3   0 23.8827 2.48629   1
   2   3   0 33.4995 3.13418   1
  -3  -3   1 185.515 12.0671  -2
   3   3   0 185.515 12.0671   1
  -4  -3   1 51.6274 9.67541  -2
   4   3   0 51.6274 9.67541   1
  -5  -3   1 193.465 14.7471  -2
   5   3   0 193.465 14.7471   1
  -6  -3   1 108.737 14.7347  -2
   6   3   0 108.737 14.7347   1
  -7  -3   1 26.3706 21.9272  -2
   7   3   0 26.3706 21.9272   1
  -8  -3   1 132.315 49.8037  -2
   8   3   0 132.315 49.8037   1
  -8  -3   2 68.9072 51.6639  -2
   8   3   0 68.9072 51.6639   1
 -10   4   1 16.7234 17.3448  -2
 -10   4   0 16.7234 17.3448   1
  -9   4   1 17.4376 15.4036  -2
  -9   4   0 17.4376 15.4036   1
  -8   4   1 1295.50 29.3241  -2
  -8   4   0 1295.50 29.3241   1
  -7   4   1 136.391 19.9722  -2
  -7   4   0 136.391 19.9722   1
  -6   4   1 9.23906 33.6641  -2
  -6   4   0 9.23906 33.6641   1
  -5   4   0 711.678 24.8078  -2
  -5   4   0 711.678 24.8078   1
  -4   4   0 343.274 11.8002  -2
  -4   4   0 343.274 11.8002   1
  -3   4   0 12.0763 5.70816  -2
  -3   4   0 12.0763 5.70816   1
  -2   4   0 195.074 8.31705  -2
  -2   4   0 195.074 8.31705   1
  -1   4   0 67.2752 34.0093  -2
  -1   4   0 67.2752 34.0093   1
   0   4   0 179.951 32.5755  -2
   0   4   0 179.951 32.5755   1
   1   4   0 113.918 4.64942   1
  -2  -4   1 114.280 12.7353  -2
   2   4   0 114.280 12.7353   1
  -3  -4   1 199.501 10.4847  -2
   3   4   0 199.501 10.4847   1
  -4  -4   1 255.002 11.7572  -2
   4   4   0 255.002 11.7572   1
  -5  -4   1 1161.85 23.7546  -2
   5   4   0 1161.85 23.7546   1
  -6  -4   1 291.156 18.2418  -2
   6   4   0 291.156 18.2418   1
  -7  -4   1 168.401 60.8220  -2
   7   4   0 168.401 60.8220   1
  -7  -4   2 -57.131 62.7730  -2
   7   4   0 -57.131 62.7730   1
  -8  -4   2 71.8998 67.8169  -2
   8   4   0 71.8998 67.8169   1
 -10   5   1 46.9803 18.3318  -2
 -10   5   0 46.9803 18.3318   1
  -9   5   1 35.1874 15.5084  -2
  -9   5   0 35.1874 15.5084   1
  -8   5   1 173.211 20.4774  -2
  -8   5   0 173.211 20.4774   1
  -7   5   1 204.220 33.4461  -2
  -7   5   0 204.220 33.4461   1
  -6   5   0 307.436 25.6570  -2
  -6   5   0 307.436 25.6570   1
  -5   5   0 674.241 15.5945  -2
  -5   5   0 674.241 15.5945   1
  -4   5   0 3577.06 42.8989  -2
  -4   5   0 3577.06 42.8989   1
  -3   5   0 38.3124 7.18462  -2
  -3   5   0 38.3124 7.18462   1
  -2   5   0 227.524 10.9260  -2
  -2   5   0 227.524 10.9260   1
  -1   5   0 -28.359 23.5937  -2
  -1   5   0 -28.359 23.5937   1
   0   5   0 307.302 6.68294   1
  -1  -5   1 553.325 24.6592  -2
   1   5   0 553.325 24.6592   1
  -2  -5   1 71.7980 11.0345  -2
   2   5   0 71.7980 11.0345   1
  -3  -5   1 193.450 11.1405  -2
   3   5   0 193.450 11.1405   1
  -4  -5   1 140.878 13.3880  -2
   4   5   0 140.878 13.3880   1
  -5  -5   1 5.32612 11.7528  -2
   5   5   0 5.32612 11.7528   1
  -6  -5   1 -12.681 27.6888  -2
   6   5   0 -12.681 27.6888   1
  -7  -5   2 129.270 56.5885  -2
   7   5   0 129.270 56.5885   1
 -10   6   1 56.6657 18.2566  -2
 -10   6   0 56.6657 18.2566   1
  -9   6   1 70.8169 14.4545  -2
  -9   6   0 70.8169 14.4545   1
  -8   6   1 58.8118 28.2482  -2
  -8   6   0 58.8118 28.2482   1
  -8   6   0 12.6550 31.3965  -2
  -8   6   0 12.6550 31.3965   1
  -7   6   0 25.6202 18.6629  -2
  -7   6   0 25.6202 18.6629   1
  -6   6   0 504.698 23.0173  -2
  -6   6   0 504.698 23.0173   1
  -5   6   0 18.0494 10.9251  -2
  -5   6   0 18.0494 10.9251   1
  -4   6   0 685.452 15.3466  -2
  -4   6   0 685.452 15.3466   1
  -3   6   0 215.704 10.6309  -2
  -3   6   0 215.704 10.6309   1
  -2   6   0 46.7856 5.06971  -2
  -2   6   0 46.7856 5.06971   1
  -1   6   0 45.8043 4.89093   1
   0  -6   1 437.357 25.4711  -2
   0   6   0 437.357 25.4711   1
  -1  -6   1 969.001 19.1518  -2
   1   6   0 969.001 19.1518   1
  -2  -6   1 248.742 11.9188  -2
   2   6   0 248.742 11.9188   1
  -3  -6   1 6.76878 11.4273  -2
   3   6   0 6.76878 11.4273   1
  -4  -6   1 50.3419 16.2726  -2
   4   6   0 50.3419 16.2726   1
  -5  -6   1 17.0928 23.5875  -2
   5   6   0 17.0928 23.5875   1
  -6  -6   1 106.592 62.0909  -2
   6   6   0 106.592 62.0909   1
 -10   7   1 47.5434 21.2590  -2
 -10   7   0 47.5434 21.2590   1
  -9   7   1 57.2423 31.9388  -2
  -9   7   0 57.2423 31.9388   1
  -8   7   0 87.0268 33.6368  -2
  -8   7   0 87.0268 33.6368   1
  -7   7   0 16.5345 15.9166  -2
  -7   7   0 16.5345 15.9166   1
  -6   7   0 389.564 20.8489  -2
  -6   7   0 389.564 20.8489   1
  -5   7   0 45.2871 10.2289  -2
  -5   7   0 45.2871 10.2289   1
  -4   7   0 56.7395 9.25206  -2
  -4   7   0 56.7395 9.25206   1
  -3   7   0 22.8015 14.0758  -2
  -3   7   0 22.8015 14.0758   1
  -2   7   0 40.6724 5.08639   1
  -1   7   0 67.3837 5.57216   1
   0  -7   1 101.592 38.5264  -2
   0   7   0 101.592 38.5264   1
  -1  -7   1 140.854 12.3415  -2
   1   7   0 140.854 12.3415   1
  -2  -7   1 25.0730 8.30443  -2
   2   7   0 25.0730 8.30443   1
  -3  -7   1 14.2159 12.5989  -2
   3   7   0 14.2159 12.5989   1
  -4  -7   1 166.819 24.6535  -2
   4   7   0 166.819 24.6535   1
  -5  -7   1 55.3109 41.6433  -2
   5   7   0 55.3109 41.6433   1
  -6  -7   2 -118.14 65.9787  -2
   6   7   0 -118.14 65.9787   1
  -9   8   1 63.3983 49.5984  -2
  -9   8   0 63.3983 49.5984   1
  -8   8   0 219.456 66.0023  -2
  -8   8   0 219.456 66.0023   1
  -7   8   0 53.8475 21.6128  -2
  -7   8   0 53.8475 21.6128   1
  -6   8   0 201.205 17.1859  -2
  -6   8   0 201.205 17.1859   1
  -5   8   0 26.1696 11.8458  -2
  -5   8   0 26.1696 11.8458   1
  -4   8   0 -25.408 29.4075  -2
  -4   8   0 -25.408 29.4075   1
  -3   8   0 49.9501 5.46374   1
  -2   8   0 296.847 11.1143   1
  -1   8   0 50.2997 5.81906   1
   0  -8   1 143.504 36.4780  -2
   0   8   0 143.504 36.4780   1
  -1  -8   1 21.2810 9.43643  -2
   1   8   0 21.2810 9.43643   1
  -2  -8   1 143.170 17.2064  -2
   2   8   0 143.170 17.2064   1
  -3  -8   1 127.840 22.0019  -2
   3   8   0 127.840 22.0019   1
  -4  -8   1 80.3528 39.3802  -2
   4   8   0 80.3528 39.3802   1
  -5  -8   2 410.582 69.3931  -2
   5   8   0 410.582 69.3931   1
  -8   9   0 66.1157 7.45341   1
  -7   9   0 80.6299 33.1672  -2
  -7   9   0 80.6299 33.1672   1
  -6   9   0 12.5413 14.7503  -2
  -6   9   0 12.5413 14.7503   1
  -5   9   0 105.224 19.9114  -2
  -5   9   0 105.224 19.9114   1
  -4   9   0 -2.6519 0.83855   1
  -3   9   0 64.2297 5.76345   1
  -2   9   0 5.64565 4.87185   1
   1  -9   1 161.999 45.1925  -2
  -1   9   0 161.999 45.1925   1
   0  -9   1 82.0832 19.1765  -2
   0   9   0 82.0832 19.1765   1
  -1  -9   1 108.454 43.8776  -2
   1   9   0 108.454 43.8776   1
  -2  -9   1 80.5271 18.7933  -2
   2   9   0 80.5271 18.7933   1
  -3  -9   1 -19.131 27.5369  -2
   3   9   0 -19.131 27.5369   1
  -7  10   0 -44.696 26.4275  -2
  -7  10   0 -44.696 26.4275   1
  -6  10   0 115.175 31.8466  -2
  -6  10   0 115.175 31.8466   1
  -5  10   0 33.0986 35.7189  -2
  -5  10   0 33.0986 35.7189   1
  -4  10   0 16.6259 5.28413   1
  -3  10   0 291.974 10.0510   1
   2 -10   1 27.7851 56.5853  -2
  -2  10   0 27.7851 56.5853   1
   1 -10   1 116.241 84.5416  -2
  -1  10   0 116.241 84.5416   1
   0 -10   1 83.2132 37.3407  -2
   0  10   0 83.2132 37.3407   1
   1  10   0 36.9125 7.37982   1
  -2 -10   1 24.0951 42.1757  -2
   2  10   0 24.0951 42.1757   1
  -6  11   0 47.1201 88.8076  -2
  -6  11   0 47.1201 88.8076   1
  -5  11   0 96.9983 8.55620   1
  -4  11   0 144.570 10.1804   1
   3 -11   1 137.922 77.7992  -2
  -3  11   0 137.922 77.7992   1
  -2  11   0 13.3395 6.96799   1
   1 -11   1 126.989 56.3651  -2
  -1  11   0 126.989 56.3651   1
   0  11   0 2.56276 16.1830   1
   0 -11   2 76.2295 34.8971  -2
   0 -11   1 76.2295 34.8971   1
   1 -11   2 132.392 15.5083  -2
   1 -11   1 132.392 15.5083   1
   2 -11   2 21.3349 11.3360  -2
   2 -11   1 21.3349 11.3360   1
   3 -11   2 80.9208 75.4580  -2
   3 -11   1 80.9208 75.4580   1
   4 -11   1 52.2501 7.05921   1
   5 -11   1 68.8457 18.1924  -2
   5 -11   1 68.8457 18.1924   1
   6 -11   1 12.8457 16.4416  -2
   6 -11   1 12.8457 16.4416   1
  -2 -10   2 -29.145 38.2014  -2
  -2 -10   1 -29.145 38.2014   1
  -1 -10   2 -0.5915 55.3451  -2
  -1 -10   1 -0.5915 55.3451   1
   0 -10   2 79.2342 21.9816  -2
   0 -10   1 79.2342 21.9816   1
   1 -10   2 204.618 13.9948  -2
   1 -10   1 204.618 13.9948   1
   2 -10   2 56.6830 12.2424  -2
   2 -10   1 56.6830 12.2424   1
   3 -10   2 -16.757 66.0605  -2
   3 -10   1 -16.757 66.0605   1
   4 -10   1 50.1629 18.5489  -2
   4 -10   1 50.1629 18.5489   1
   5 -10   1 10.1225 14.0716  -2
   5 -10   1 10.1225 14.0716   1
   6 -10   1 -29.954 16.9348  -2
   6 -10   1 -29.954 16.9348   1
   7 -10   1 -8.9801 22.4063  -2
   7 -10   1 -8.9801 22.4063   1
  -3  -9   2 8.92901 29.6605  -2
  -3  -9   1 8.92901 29.6605   1
  -2  -9   2 10.9959 13.7635  -2
  -2  -9   1 10.9959 13.7635   1
  -1  -9   2 143.739 14.3840  -2
  -1  -9   1 143.739 14.3840   1
   0  -9   2 69.8751 13.8995  -2
   0  -9   1 69.8751 13.8995   1
   1  -9   2 165.671 14.1886  -2
   1  -9   1 165.671 14.1886   1
   2  -9   1 29.0400 3.78223   1
   3  -9   1 85.7684 6.01436   1
   4  -9   1 124.589 13.2497  -2
   4  -9   1 124.589 13.2497   1
   5  -9   1 141.613 16.0257  -2
   5  -9   1 141.613 16.0257   1
   6  -9   1 123.483 14.7479  -2
   6  -9   1 123.483 14.7479   1
   7  -9   1 1.16072 14.6383  -2
   7  -9   1 1.16072 14.6383   1
   8  -9   1 22.5725 21.9506  -2
   8  -9   1 22.5725 21.9506   1
  -5  -8   2 347.797 80.1236  -2
  -5  -8   1 347.797 80.1236   1
  -5  -8   3 150.889 63.8885  -2
  -5  -8   1 150.889 63.8885   1
  -4  -8   2 7.28674 35.1238  -2
  -4  -8   1 7.28674 35.1238   1
  -3  -8   2 51.1460 16.1231  -2
  -3  -8   1 51.1460 16.1231   1
  -2  -8   2 28.3036 9.64417  -2
  -2  -8   1 28.3036 9.64417   1
  -1  -8   2 43.9826 10.5482  -2
  -1  -8   1 43.9826 10.5482   1
   0  -8   2 223.811 16.2341  -2
   0  -8   1 223.811 16.2341   1
   1  -8   2 59.3453 49.0193  -2
   1  -8   1 59.3453 49.0193   1
   2  -8   1 82.7827 4.53647   1
   3  -8   1 1045.29 26.5080  -2
   3  -8   1 1045.29 26.5080   1
   4  -8   1 1175.12 25.5166  -2
   4  -8   1 1175.12 25.5166   1
   5  -8   1 11.1915 9.64811  -2
   5  -8   1 11.1915 9.64811   1
   6  -8   1 -15.808 11.9889  -2
   6  -8   1 -15.808 11.9889   1
   7  -8   1 -2.4185 16.0876  -2
   7  -8   1 -2.4185 16.0876   1
   8  -8   1 92.8794 25.0134  -2
   8  -8   1 92.8794 25.0134   1
  -9   8   0 -11.471 45.8775  -2
   9  -8   1 -11.471 45.8775   1
  -6  -7   3 128.181 86.8764  -2
  -6  -7   1 128.181 86.8764   1
  -5  -7   2 66.3423 43.9313  -2
  -5  -7   1 66.3423 43.9313   1
  -4  -7   2 143.426 21.4490  -2
  -4  -7   1 143.426 21.4490   1
  -3  -7   2 6.75645 13.9764  -2
  -3  -7   1 6.75645 13.9764   1
  -2  -7   2 123.848 9.24137  -2
  -2  -7   1 123.848 9.24137   1
  -1  -7   2 83.5827 4.95213  -2
  -1  -7   1 83.5827 4.95213   1
   0  -7   2 32.8495 7.60412  -2
   0  -7   1 32.8495 7.60412   1
   1  -7   1 80.2593 6.12438   1
   2  -7   1 58.5437 48.3681  -2
   2  -7   1 58.5437 48.3681   1
   3  -7   1 26.0912 9.28282  -2
   3  -7   1 26.0912 9.28282   1
   4  -7   1 132.455 7.67433  -2
   4  -7   1 132.455 7.67433   1
   5  -7   1 53.3313 9.68687  -2
   5  -7   1 53.3313 9.68687   1
   6  -7   1 3.86516 12.3488  -2
   6  -7   1 3.86516 12.3488   1
   7  -7   1 10.9971 18.3904  -2
   7  -7   1 10.9971 18.3904   1
   8  -7   1 78.7743 24.1780  -2
   8  -7   1 78.7743 24.1780   1
  -8   7   0 127.327 29.5486  -2
   8  -7   1 127.327 29.5486   1
  -9   7   0 39.6773 21.6339  -2
   9  -7   1 39.6773 21.6339   1
 -10   7   0 122.925 18.9137  -2
  10  -7   1 122.925 18.9137   1
  -7  -6   3 28.2063 38.7899  -2
  -7  -6   1 28.2063 38.7899   1
  -6  -6   3 4.63151 83.6957  -2
  -6  -6   1 4.63151 83.6957   1
  -5  -6   2 24.9034 19.4229  -2
  -5  -6   1 24.9034 19.4229   1
  -4  -6   2 -4.1973 11.7331  -2
  -4  -6   1 -4.1973 11.7331   1
  -3  -6   2 16.1543 11.4861  -2
  -3  -6   1 16.1543 11.4861   1
  -2  -6   2 96.8414 9.88120  -2
  -2  -6   1 96.8414 9.88120   1
  -1  -6   2 387.169 12.2372  -2
  -1  -6   1 387.169 12.2372   1
   0  -6   2 43.4549 16.9898  -2
   0  -6   1 43.4549 16.9898   1
   1  -6   1 12.7086 4.16832   1
   2  -6   1 -5.4580 4.28831  -2
   2  -6   1 -5.4580 4.28831   1
   3  -6   1 449.455 11.3619  -2
   3  -6   1 449.455 11.3619   1
   4  -6   1 1157.92 20.8158  -2
   4  -6   1 1157.92 20.8158   1
   5  -6   1 96.5484 11.5063  -2
   5  -6   1 96.5484 11.5063   1
   6  -6   1 131.767 13.0593  -2
   6  -6   1 131.767 13.0593   1
  -7   6   0 127.975 39.7654  -2
   7  -6   1 127.975 39.7654   1
   7  -6   1 121.380 24.5330  -2
   7  -6   1 121.380 24.5330   1
  -8   6   0 51.4328 23.8707  -2
   8  -6   1 51.4328 23.8707   1
   8  -6   1 14.1488 58.7699  -2
   8  -6   1 14.1488 58.7699   1
  -9   6   0 79.4392 13.7814  -2
   9  -6   1 79.4392 13.7814   1
 -10   6   0 41.2956 16.2345  -2
  10  -6   1 41.2956 16.2345   1
  -7  -5   3 -53.025 52.3411  -2
  -7  -5   1 -53.025 52.3411   1
  -6  -5   2 27.0326 20.6828  -2
  -6  -5   1 27.0326 20.6828   1
  -5  -5   2 53.5844 11.4772  -2
  -5  -5   1 53.5844 11.4772   1
  -4  -5   2 118.389 10.5079  -2
  -4  -5   1 118.389 10.5079   1
  -3  -5   2 115.579 10.2303  -2
  -3  -5   1 115.579 10.2303   1
  -2  -5   2 -9.4284 9.98247  -2
  -2  -5   1 -9.4284 9.98247   1
  -1  -5   2 1037.42 33.2242  -2
  -1  -5   1 1037.42 33.2242   1
   0  -5   1 25.9915 1.78697   1
   1  -5   1 233.159 49.3681  -2
   1  -5   1 233.159 49.3681   1
   2  -5   1 275.346 7.96249  -2
   2  -5   1 275.346 7.96249   1
   3  -5   1 216.645 8.70150  -2
   3  -5   1 216.645 8.70150   1
   4  -5   1 30.7416 5.49961  -2
   4  -5   1 30.7416 5.49961   1
   5  -5   1 263.973 10.6157  -2
   5  -5   1 263.973 10.6157   1
   6  -5   1 326.985 18.6620  -2
   6  -5   1 326.985 18.6620   1
  -7   5   0 303.155 28.1109  -2
   7  -5   1 303.155 28.1109   1
  -8   5   0 57.1786 19.5973  -2
   8  -5   1 57.1786 19.5973   1
  -9   5   0 70.2573 14.9478  -2
   9  -5   1 70.2573 14.9478   1
 -10   5   0 81.9677 19.3791  -2
  10  -5   1 81.9677 19.3791   1
  -8  -4   3 63.3843 30.4043  -2
  -8  -4   1 63.3843 30.4043   1
  -7  -4   2 121.926 32.6532  -2
  -7  -4   1 121.926 32.6532   1
  -6  -4   2 347.158 17.4034  -2
  -6  -4   1 347.158 17.4034   1
  -5  -4   2 957.144 23.9708  -2
  -5  -4   1 957.144 23.9708   1
  -4  -4   2 784.890 17.9326  -2
  -4  -4   1 784.890 17.9326   1
  -3  -4   2 195.226 11.4397  -2
  -3  -4   1 195.226 11.4397   1
  -2  -4   2 262.626 12.2677  -2
  -2  -4   1 262.626 12.2677   1
  -1  -4   1 1052.85 13.1641   1
   0  -4   1 1215.24 34.3665  -2
   0  -4   1 1215.24 34.3665   1
   1  -4   1 7.58893 5.79268  -2
   1  -4   1 7.58893 5.79268   1
   2  -4   1 967.720 16.5158  -2
   2  -4   1 967.720 16.5158   1
   3  -4   1 180.450 7.24554  -2
   3  -4   1 180.450 7.24554   1
   4  -4   1 110.267 8.39506  -2
   4  -4   1 110.267 8.39506   1
   5  -4   1 42.5758 11.0521  -2
   5  -4   1 42.5758 11.0521   1
  -6   4   0 112.300 37.2005  -2
   6  -4   1 112.300 37.2005   1
   6  -4   1 53.9452 43.5557  -2
   6  -4   1 53.9452 43.5557   1
  -7   4   0 304.024 22.7270  -2
   7  -4   1 304.024 22.7270   1
  -8   4   0 749.556 22.9254  -2
   8  -4   1 749.556 22.9254   1
  -9   4   0 12.2818 15.3198  -2
   9  -4   1 12.2818 15.3198   1
 -10   4   0 25.0637 15.6525  -2
  10  -4   1 25.0637 15.6525   1
  -8  -3   3 2.29939 43.9421  -2
  -8  -3   1 2.29939 43.9421   1
  -8  -3   2 52.0979 57.0533  -2
  -8  -3   1 52.0979 57.0533   1
  -7  -3   2 213.186 23.5416  -2
  -7  -3   1 213.186 23.5416   1
  -6  -3   2 110.077 14.5535  -2
  -6  -3   1 110.077 14.5535   1
  -5  -3   2 188.104 14.0635  -2
  -5  -3   1 188.104 14.0635   1
  -4  -3   2 46.6553 9.70737  -2
  -4  -3   1 46.6553 9.70737   1
  -3  -3   2 226.740 16.3626  -2
  -3  -3   1 226.740 16.3626   1
  -2  -3   1 212.224 6.78911   1
  -1  -3   1 1.32775 1.98299   1
   0  -3   1 37.4263 9.81240  -2
   0  -3   1 37.4263 9.81240   1
   1  -3   1 3.40193 7.16203  -2
   1  -3   1 3.40193 7.16203   1
   2  -3   1 71.1574 3.78567  -2
   2  -3   1 71.1574 3.78567   1
   3  -3   1 336.980 8.40950  -2
   3  -3   1 336.980 8.40950   1
   4  -3   1 630.979 23.5941  -2
   4  -3   1 630.979 23.5941   1
   5  -3   1 179.466 26.4674  -2
   5  -3   1 179.466 26.4674   1
  -6   3   0 81.8880 33.1826  -2
   6  -3   1 81.8880 33.1826   1
  -7   3   0 185.129 16.7984  -2
   7  -3   1 185.129 16.7984   1
  -8   3   0 80.4692 12.8576  -2
   8  -3   1 80.4692 12.8576   1
  -9   3   0 28.0325 16.8132  -2
   9  -3   1 28.0325 16.8132   1
 -10   3   0 37.2834 17.4896  -2
  10  -3   1 37.2834 17.4896   1
  -9  -2   2 400.528 42.1211  -2
  -9  -2   1 400.528 42.1211   1
  -9  -2   3 548.318 96.3249  -2
  -9  -2   1 548.318 96.3249   1
  -8  -2   2 229.418 30.0507  -2
  -8  -2   1 229.418 30.0507   1
  -7  -2   2 72.0121 16.6058  -2
  -7  -2   1 72.0121 16.6058   1
  -6  -2   2 60.0014 12.5041  -2
  -6  -2   1 60.0014 12.5041   1
  -5  -2   2 288.810 13.7231  -2
  -5  -2   1 288.810 13.7231   1
  -4  -2   2 159.974 17.4517  -2
  -4  -2   1 159.974 17.4517   1
  -3  -2   2 61.3849 45.8298  -2
  -3  -2   1 61.3849 45.8298   1
  -2  -2   1 919.007 11.8942   1
  -1  -2   1 142.793 15.1086  -2
  -1  -2   1 142.793 15.1086   1
   0  -2   1 2598.49 46.3172  -2
   0  -2   1 2598.49 46.3172   1
   1  -2   1 427.018 6.96547  -2
   1  -2   1 427.018 6.96547   1
   2  -2   1 60.1041 5.16261  -2
   2  -2   1 60.1041 5.16261   1
   3  -2   1 563.634 23.7894  -2
   3  -2   1 563.634 23.7894   1
   4  -2   1 173.246 35.9842  -2
   4  -2   1 173.246 35.9842   1
   5  -2   1 574.168 13.6400   1
  -6   2   0 23.5420 13.7807  -2
   6  -2   1 23.5420 13.7807   1
  -7   2   0 91.6604 12.5985  -2
   7  -2   1 91.6604 12.5985   1
  -8   2   0 118.259 14.9109  -2
   8  -2   1 118.259 14.9109   1
  -9   2   0 140.740 21.2664  -2
   9  -2   1 140.740 21.2664   1
 -10   2   0 21.6276 23.2440  -2
  10  -2   1 21.6276 23.2440   1
  -9  -1   2 343.661 49.6130  -2
  -9  -1   1 343.661 49.6130   1
  -8  -1   2 415.510 27.7545  -2
  -8  -1   1 415.510 27.7545   1
  -7  -1   2 7.24826 13.2424  -2
  -7  -1   1 7.24826 13.2424   1
  -6  -1   2 121.681 13.3191  -2
  -6  -1   1 121.681 13.3191   1
  -5  -1   2 113.831 12.2591  -2
  -5  -1   1 113.831 12.2591   1
  -4  -1   2 820.382 49.3223  -2
  -4  -1   1 820.382 49.3223   1
  -3  -1   1 286.278 8.21640   1
  -2  -1   1 2129.33 22.4020   1
  -1  -1   1 2456.57 23.3594   1
   0  -1   1 4767.75 97.4772  -2
   0  -1   1 4767.75 97.4772   1
   1  -1   1 80.4305 3.72076  -2
   1  -1   1 80.4305 3.72076   1
   2  -1   1 578.712 38.7406  -2
   2  -1   1 578.712 38.7406   1
   3  -1   1 16.5337 3.06835   1
   4  -1   1 17.3305 5.07876   1
  -5   1   0 1370.38 87.2480  -2
   5  -1   1 1370.38 87.2480   1
  -6   1   0 79.6489 11.9324  -2
   6  -1   1 79.6489 11.9324   1
  -7   1   0 73.4582 12.6789  -2
   7  -1   1 73.4582 12.6789   1
  -8   1   0 151.648 16.1445  -2
   8  -1   1 151.648 16.1445   1
  -9   1   0 447.492 24.7393  -2
   9  -1   1 447.492 24.7393   1
 -10   1   0 69.2534 29.4949  -2
  10  -1   1 69.2534 29.4949   1
 -10   0   2 99.2958 45.0028  -2
 -10   0   1 99.2958 45.0028   1
  -9   0   2 93.9569 26.6461  -2
  -9   0   1 93.9569 26.6461   1
  -8   0   2 148.603 18.4442  -2
  -8   0   1 148.603 18.4442   1
  -7   0   2 26.5081 12.9336  -2
  -7   0   1 26.5081 12.9336   1
  -6   0   2 562.297 21.4185  -2
  -6   0   1 562.297 21.4185   1
  -5   0   2 383.883 17.6985  -2
  -5   0   1 383.883 17.6985   1
  -4   0   1 2035.16 26.2352   1
  -3   0   1 130.017 5.99666   1
  -2   0   1 1974.42 19.7735   1
  -1   0   1 356.712 5.62264   1
   1   0   1 91.5964 2.84087   1
   2   0   1 970.959 13.2329   1
   3   0   1 436.779 9.28303   1
   4   0   1 3.98609 4.00533   1
   5   0   0 2166.30 40.0424  -2
   5   0   1 2166.30 40.0424   1
   6   0   0 478.277 19.5747  -2
   6   0   1 478.277 19.5747   1
   7   0   0 248.877 16.4289  -2
   7   0   1 248.877 16.4289   1
   8   0   0 61.5587 18.8150  -2
   8   0   1 61.5587 18.8150   1
   9   0   0 120.381 21.6219  -2
   9   0   1 120.381 21.6219   1
  10   0   0 -15.941 45.6478  -2
  10   0   1 -15.941 45.6478   1
 -10   0   1 277.517 108.571  -2
  10   0   1 277.517 108.571   1
 -10   1   2 45.4290 34.8818  -2
 -10   1   1 45.4290 34.8818   1
  -9   1   2 80.2756 20.3823  -2
  -9   1   1 80.2756 20.3823   1
  -8   1   2 -10.658 14.3917  -2
  -8   1   1 -10.658 14.3917   1
  -7   1   2 17.1136 11.4954  -2
  -7   1   1 17.1136 11.4954   1
  -6   1   2 154.925 19.0918  -2
  -6   1   1 154.925 19.0918   1
  -5   1   2 468.794 52.4445  -2
  -5   1   1 468.794 52.4445   1
  -4   1   1 619.799 13.0633   1
  -3   1   1 35.9187 19.2775  -2
  -3   1   1 35.9187 19.2775   1
  -2   1   1 57.3128 15.8788  -2
  -2   1   1 57.3128 15.8788   1
  -1   1   1 24.1617 4.85042  -2
  -1   1   1 24.1617 4.85042   1
   0   1   1 10.4572 6.07399  -2
   0   1   1 10.4572 6.07399   1
   1   1   1 296.844 5.10466   1
   2   1   1 2.94152 2.38437   1
   3   1   1 117.799 6.18611   1
   4   1   0 684.365 31.1560  -2
   4   1   1 684.365 31.1560   1
   5   1   0 471.112 13.9589  -2
   5   1   1 471.112 13.9589   1
   6   1   0 268.590 14.0724  -2
   6   1   1 268.590 14.0724   1
   7   1   0 108.209 16.9583  -2
   7   1   1 108.209 16.9583   1
   8   1   0 162.635 21.1176  -2
   8   1   1 162.635 21.1176   1
   9   1   0 79.4120 37.7456  -2
   9   1   1 79.4120 37.7456   1
 -10   2   2 41.4054 29.4664  -2
 -10   2   1 41.4054 29.4664   1
  -9   2   2 85.7321 13.7179  -2
  -9   2   1 85.7321 13.7179   1
  -8   2   2 24.2592 14.4737  -2
  -8   2   1 24.2592 14.4737   1
  -7   2   2 182.402 15.5433  -2
  -7   2   1 182.402 15.5433   1
  -6   2   2 338.656 27.3896  -2
  -6   2   1 338.656 27.3896   1
  -5   2   1 12.5276 4.42626   1
  -4   2   1 546.995 40.5173  -2
  -4   2   1 546.995 40.5173   1
  -3   2   1 275.326 17.3664  -2
  -3   2   1 275.326 17.3664   1
  -2   2   1 336.943 10.4426  -2
  -2   2   1 336.943 10.4426   1
  -1   2   1 52.7504 5.69588  -2
  -1   2   1 52.7504 5.69588   1
   0   2   1 23.5318 14.9351  -2
   0   2   1 23.5318 14.9351   1
   1   2   1 5493.36 151.050  -2
   1   2   1 5493.36 151.050   1
   2   2   1 5.29691 2.57583   1
   3   2   0 140.476 20.5368  -2
   3   2   1 140.476 20.5368   1
   4   2   0 272.248 17.6478  -2
   4   2   1 272.248 17.6478   1
   5   2   0 374.370 13.7425  -2
   5   2   1 374.370 13.7425   1
   6   2   0 28.3879 11.1134  -2
   6   2   1 28.3879 11.1134   1
   7   2   0 73.3503 19.7633  -2
   7   2   1 73.3503 19.7633   1
   8   2   0 70.0806 22.5802  -2
   8   2   1 70.0806 22.5802   1
   9   2   0 140.564 97.1211  -2
   9   2   1 140.564 97.1211   1
 -10   3   2 98.1226 23.6781  -2
 -10   3   1 98.1226 23.6781   1
  -9   3   2 -5.1189 16.5480  -2
  -9   3   1 -5.1189 16.5480   1
  -8   3   2 6.69184 11.8810  -2
  -8   3   1 6.69184 11.8810   1
  -7   3   2 346.952 24.3558  -2
  -7   3   1 346.952 24.3558   1
  -6   3   2 140.842 29.1700  -2
  -6   3   1 140.842 29.1700   1
  -5   3   1 10.3444 3.42901   1
  -4   3   1 1.02518 13.4309  -2
  -4   3   1 1.02518 13.4309   1
  -3   3   1 6.13634 10.7781  -2
  -3   3   1 6.13634 10.7781   1
  -2   3   1 75.0632 7.03487  -2
  -2   3   1 75.0632 7.03487   1
  -1   3   1 -6.4882 4.93041  -2
  -1   3   1 -6.4882 4.93041   1
   0   3   1 1315.76 68.9638  -2
   0   3   1 1315.76 68.9638   1
   1   3   1 623.199 8.17029   1
   2   3   1 25.9216 3.27428   1
   3   3   0 59.3858 8.92831  -2
   3   3   1 59.3858 8.92831   1
   4   3   0 285.544 12.7122  -2
   4   3   1 285.544 12.7122   1
   5   3   0 190.940 12.6338  -2
   5   3   1 190.940 12.6338   1
   6   3   0 22.8634 12.9732  -2
   6   3   1 22.8634 12.9732   1
   7   3   0 60.9635 24.8659  -2
   7   3   1 60.9635 24.8659   1
   8   3   0 78.9615 66.6340  -2
   8   3   1 78.9615 66.6340   1
  -8  -3   1 53.3301 78.1757  -2
   8   3   1 53.3301 78.1757   1
 -10   4   2 13.6768 20.7733  -2
 -10   4   1 13.6768 20.7733   1
  -9   4   2 60.7251 16.4122  -2
  -9   4   1 60.7251 16.4122   1
  -8   4   2 1456.84 36.7843  -2
  -8   4   1 1456.84 36.7843   1
  -7   4   2 159.574 26.9757  -2
  -7   4   1 159.574 26.9757   1
  -6   4   1 19.6595 4.19161   1
  -5   4   1 1068.56 34.8493  -2
  -5   4   1 1068.56 34.8493   1
  -4   4   1 28.5292 9.45554  -2
  -4   4   1 28.5292 9.45554   1
  -3   4   1 47.6647 9.76289  -2
  -3   4   1 47.6647 9.76289   1
  -2   4   1 66.6703 7.71301  -2
  -2   4   1 66.6703 7.71301   1
  -1   4   1 28.8379 22.4574  -2
  -1   4   1 28.8379 22.4574   1
   0   4   1 4.99025 2.36725   1
   1   4   1 1742.40 17.6909   1
   2   4   0 87.9372 12.2224  -2
   2   4   1 87.9372 12.2224   1
   3   4   0 9.01673 7.78823  -2
   3   4   1 9.01673 7.78823   1
   4   4   0 295.247 10.8763  -2
   4   4   1 295.247 10.8763   1
   5   4   0 1306.40 25.7586  -2
   5   4   1 1306.40 25.7586   1
   6   4   0 295.342 19.6281  -2
   6   4   1 295.342 19.6281   1
   7   4   0 112.559 57.1849  -2
   7   4   1 112.559 57.1849   1
  -8  -4   1 35.5930 67.8778  -2
   8   4   1 35.5930 67.8778   1
 -10   5   2 -55.294 21.8409  -2
 -10   5   1 -55.294 21.8409   1
  -9   5   2 64.8140 16.5681  -2
  -9   5   1 64.8140 16.5681   1
  -8   5   2 55.0297 22.8488  -2
  -8   5   1 55.0297 22.8488   1
  -7   5   1 197.346 9.21841   1
  -6   5   1 -15.313 32.9066  -2
  -6   5   1 -15.313 32.9066   1
  -5   5   1 104.643 11.8665  -2
  -5   5   1 104.643 11.8665   1
  -4   5   1 682.142 15.6117  -2
  -4   5   1 682.142 15.6117   1
  -3   5   1 106.542 8.93545  -2
  -3   5   1 106.542 8.93545   1
  -2   5   1 404.312 24.7057  -2
  -2   5   1 404.312 24.7057   1
  -1   5   1 1492.64 90.0900  -2
  -1   5   1 1492.64 90.0900   1
   0   5   1 59.3723 3.42286   1
   1   5   1 320.614 6.45416   1
   2   5   0 130.327 10.2704  -2
   2   5   1 130.327 10.2704   1
   3   5   0 144.541 11.5581  -2
   3   5   1 144.541 11.5581   1
   4   5   0 148.144 13.7438  -2
   4   5   1 148.144 13.7438   1
   5   5   0 14.8569 14.5370  -2
   5   5   1 14.8569 14.5370   1
   6   5   0 35.8807 25.0005  -2
   6   5   1 35.8807 25.0005   1
   7   5   0 138.461 50.7770  -2
   7   5   1 138.461 50.7770   1
  -7  -5   1 109.277 53.4243  -2
   7   5   1 109.277 53.4243   1
 -10   6   2 16.7095 18.1287  -2
 -10   6   1 16.7095 18.1287   1
  -9   6   2 197.984 20.6505  -2
  -9   6   1 197.984 20.6505   1
  -8   6   2 128.637 43.5392  -2
  -8   6   1 128.637 43.5392   1
  -7   6   1 6.54626 4.27089   1
  -6   6   1 34.3473 23.2420  -2
  -6   6   1 34.3473 23.2420   1
  -5   6   1 385.644 17.3872  -2
  -5   6   1 385.644 17.3872   1
  -4   6   1 981.835 20.6509  -2
  -4   6   1 981.835 20.6509   1
  -3   6   1 -4.1813 9.53360  -2
  -3   6   1 -4.1813 9.53360   1
  -2   6   1 43.0539 4.67461   1
  -1   6   1 239.884 8.53360   1
   0   6   1 23.9232 2.22594   1
   1   6   0 1190.93 29.0211  -2
   1   6   1 1190.93 29.0211   1
   2   6   0 336.468 12.1385  -2
   2   6   1 336.468 12.1385   1
   3   6   0 103.462 15.2320  -2
   3   6   1 103.462 15.2320   1
   4   6   0 158.295 20.2740  -2
   4   6   1 158.295 20.2740   1
   5   6   0 129.834 36.5620  -2
   5   6   1 129.834 36.5620   1
   6   6   1 109.815 8.25601   1
 -10   7   1 10.0595 8.76106   1
  -9   7   2 158.961 33.6841  -2
  -9   7   1 158.961 33.6841   1
  -8   7   1 21.8552 30.8237  -2
  -8   7   1 21.8552 30.8237   1
  -7   7   1 136.839 26.3548  -2
  -7   7   1 136.839 26.3548   1
  -6   7   1 -4.3575 21.1910  -2
  -6   7   1 -4.3575 21.1910   1
  -5   7   1 237.898 16.1787  -2
  -5   7   1 237.898 16.1787   1
  -4   7   1 63.3272 9.16586  -2
  -4   7   1 63.3272 9.16586   1
  -3   7   1 20.6201 17.1602  -2
  -3   7   1 20.6201 17.1602   1
  -2   7   1 170.787 8.12607   1
  -1   7   1 3.61218 3.78680   1
   0   7   1 9.89906 3.50774   1
   1   7   0 303.896 15.6540  -2
   1   7   1 303.896 15.6540   1
   2   7   0 198.948 11.8625  -2
   2   7   1 198.948 11.8625   1
   3   7   0 191.328 20.5309  -2
   3   7   1 191.328 20.5309   1
   4   7   0 63.9331 25.3818  -2
   4   7   1 63.9331 25.3818   1
   5   7   0 16.4209 53.7257  -2
   5   7   1 16.4209 53.7257   1
  -9   8   1 152.502 42.0751  -2
  -9   8   1 152.502 42.0751   1
  -8   8   1 35.2074 7.21833   1
  -7   8   1 14.4489 5.38709   1
  -6   8   1 11.8167 20.0831  -2
  -6   8   1 11.8167 20.0831   1
  -5   8   1 45.6099 30.3723  -2
  -5   8   1 45.6099 30.3723   1
  -4   8   1 365.557 37.5796  -2
  -4   8   1 365.557 37.5796   1
  -3   8   1 385.119 11.5119   1
  -2   8   1 3.91203 4.56818   1
  -1   8   1 15.0317 5.01751   1
   0   8   0 59.9742 40.4827  -2
   0   8   1 59.9742 40.4827   1
   1   8   0 12.9466 12.9714  -2
   1   8   1 12.9466 12.9714   1
   2   8   0 137.467 23.0500  -2
   2   8   1 137.467 23.0500   1
   3   8   0 173.699 34.8487  -2
   3   8   1 173.699 34.8487   1
   4   8   0 140.649 53.3257  -2
   4   8   1 140.649 53.3257   1
  -8   9   1 1.24462 5.37434   1
  -7   9   1 73.6058 6.90456   1
  -6   9   1 156.131 8.43689   1
  -5   9   1 73.8884 26.9600  -2
  -5   9   1 73.8884 26.9600   1
  -4   9   1 -0.5118 4.90989   1
  -3   9   1 289.523 10.3819   1
  -2   9   1 5.47472 4.99559   1
  -1   9   1 33.1221 3.66972   1
   0   9   0 318.320 86.6730  -2
   0   9   1 318.320 86.6730   1
   1   9   1 40.6215 3.99717   1
   2   9   0 124.771 33.5534  -2
   2   9   1 124.771 33.5534   1
   3   9   1 22.8612 4.55939   1
  -7  10   1 23.2911 5.43118   1
  -6  10   1 200.810 9.15057   1
  -5  10   1 44.8337 6.78712   1
  -4  10   1 148.076 8.86582   1
  -3  10   1 8.65315 4.30303   1
  -2  10   1 14.0737 6.02806   1
  -1  10   1 -2.3742 4.56173   1
   0  10   1 46.4298 6.93529   1
   1  10   1 25.2603 6.95311   1
   2  10   1 3.92934 5.90268   1
  -6  11   1 17.3659 9.91717   1
  -5  11   1 75.7982 9.76462   1
  -4  11   1 55.4798 7.25242   1
  -3  11   1 91.3837 6.92143   1
  -2  11   1 -5.9216 6.30001   1
  -1  11   1 15.7938 5.54707   1
   0 -11   3 38.6880 18.0995  -2
   0 -11   2 38.6880 18.0995   1
   1 -11   3 108.259 18.2451  -2
   1 -11   2 108.259 18.2451   1
   2 -11   3 40.4284 14.5798  -2
   2 -11   2 40.4284 14.5798   1
   3 -11   3 189.195 74.2427  -2
   3 -11   2 189.195 74.2427   1
   4 -11   2 11.0954 5.56059   1
   5 -11   2 -14.055 18.0696  -2
   5 -11   2 -14.055 18.0696   1
   6 -11   2 52.4458 17.0404  -2
   6 -11   2 52.4458 17.0404   1
  -2 -10   3 12.7837 20.0901  -2
  -2 -10   2 12.7837 20.0901   1
  -1 -10   3 82.0251 26.2583  -2
  -1 -10   2 82.0251 26.2583   1
   0 -10   3 33.8556 14.6254  -2
   0 -10   2 33.8556 14.6254   1
   1 -10   3 282.354 15.4685  -2
   1 -10   2 282.354 15.4685   1
   2 -10   3 116.643 16.5762  -2
   2 -10   2 116.643 16.5762   1
   3 -10   2 -27.543 58.6456  -2
   3 -10   2 -27.543 58.6456   1
   3 -10   3 -81.961 65.8243  -2
   3 -10   2 -81.961 65.8243   1
   4 -10   2 58.1896 19.6891  -2
   4 -10   2 58.1896 19.6891   1
   5 -10   2 28.0916 11.4904  -2
   5 -10   2 28.0916 11.4904   1
   6 -10   2 -17.077 16.4463  -2
   6 -10   2 -17.077 16.4463   1
   7 -10   2 -1.1749 15.0270  -2
   7 -10   2 -1.1749 15.0270   1
  -3  -9   3 154.694 26.8628  -2
  -3  -9   2 154.694 26.8628   1
  -2  -9   3 78.2615 15.0470  -2
  -2  -9   2 78.2615 15.0470   1
  -1  -9   3 235.516 11.2115  -2
  -1  -9   2 235.516 11.2115   1
   0  -9   3 109.575 14.3395  -2
   0  -9   2 109.575 14.3395   1
   1  -9   3 52.2331 12.3276  -2
   1  -9   2 52.2331 12.3276   1
   2  -9   3 118.073 16.4829  -2
   2  -9   2 118.073 16.4829   1
   3  -9   2 350.514 46.3314  -2
   3  -9   2 350.514 46.3314   1
   4  -9   2 135.073 11.2742  -2
   4  -9   2 135.073 11.2742   1
   5  -9   2 3.55859 7.89477  -2
   5  -9   2 3.55859 7.89477   1
   6  -9   2 10.7838 11.3033  -2
   6  -9   2 10.7838 11.3033   1
   7  -9   2 40.4321 14.7179  -2
   7  -9   2 40.4321 14.7179   1
   8  -9   2 98.2422 19.3969  -2
   8  -9   2 98.2422 19.3969   1
  -5  -8   4 277.516 50.6108  -2
  -5  -8   2 277.516 50.6108   1
  -5  -8   3 305.063 80.6823  -2
  -5  -8   2 305.063 80.6823   1
  -4  -8   3 17.0285 29.7023  -2
  -4  -8   2 17.0285 29.7023   1
  -3  -8   3 181.364 15.2999  -2
  -3  -8   2 181.364 15.2999   1
  -2  -8   3 261.406 11.6994  -2
  -2  -8   2 261.406 11.6994   1
  -1  -8   3 34.0247 8.54276  -2
  -1  -8   2 34.0247 8.54276   1
   0  -8   3 119.462 8.47071  -2
   0  -8   2 119.462 8.47071   1
   1  -8   2 68.2684 6.40181   1
   2  -8   2 18.1526 4.45581   1
   3  -8   2 23.0555 6.99636  -2
   3  -8   2 23.0555 6.99636   1
   4  -8   2 0.12945 6.20869  -2
   4  -8   2 0.12945 6.20869   1
   5  -8   2 21.8692 8.29982  -2
   5  -8   2 21.8692 8.29982   1
   6  -8   2 -8.2713 13.7457  -2
   6  -8   2 -8.2713 13.7457   1
   7  -8   2 173.209 16.7262  -2
   7  -8   2 173.209 16.7262   1
   8  -8   2 127.970 24.2544  -2
   8  -8   2 127.970 24.2544   1
   9  -8   1 28.4908 32.7412  -2
   9  -8   2 28.4908 32.7412   1
  -6  -7   4 84.1395 50.3152  -2
  -6  -7   2 84.1395 50.3152   1
  -5  -7   3 147.227 73.1787  -2
  -5  -7   2 147.227 73.1787   1
  -4  -7   3 173.408 17.6957  -2
  -4  -7   2 173.408 17.6957   1
  -3  -7   3 113.416 14.4522  -2
  -3  -7   2 113.416 14.4522   1
  -2  -7   3 109.737 10.9912  -2
  -2  -7   2 109.737 10.9912   1
  -1  -7   3 145.538 8.51491  -2
  -1  -7   2 145.538 8.51491   1
   0  -7   3 5.47682 11.4093  -2
   0  -7   2 5.47682 11.4093   1
   1  -7   3 340.063 21.6044  -2
   1  -7   2 340.063 21.6044   1
   2  -7   2 2.86725 7.10331  -2
   2  -7   2 2.86725 7.10331   1
   3  -7   2 2.27759 4.71163  -2
   3  -7   2 2.27759 4.71163   1
   4  -7   2 39.9933 7.01901  -2
   4  -7   2 39.9933 7.01901   1
   5  -7   2 61.1909 9.55264  -2
   5  -7   2 61.1909 9.55264   1
   6  -7   2 506.659 18.7021  -2
   6  -7   2 506.659 18.7021   1
   7  -7   2 188.676 20.2080  -2
   7  -7   2 188.676 20.2080   1
   8  -7   2 9.05830 29.0163  -2
   8  -7   2 9.05830 29.0163   1
   9  -7   1 43.0289 18.5287  -2
   9  -7   2 43.0289 18.5287   1
  10  -7   1 -6.6330 38.0723  -2
  10  -7   2 -6.6330 38.0723   1
  -7  -6   4 14.3742 36.9463  -2
  -7  -6   2 14.3742 36.9463   1
  -6  -6   4 -43.228 67.6122  -2
  -6  -6   2 -43.228 67.6122   1
  -5  -6   3 33.5221 18.5687  -2
  -5  -6   2 33.5221 18.5687   1
  -4  -6   3 90.3359 12.9404  -2
  -4  -6   2 90.3359 12.9404   1
  -3  -6   3 84.6661 12.6769  -2
  -3  -6   2 84.6661 12.6769   1
  -2  -6   3 82.9407 10.7178  -2
  -2  -6   2 82.9407 10.7178   1
  -1  -6   3 410.734 13.8829  -2
  -1  -6   2 410.734 13.8829   1
   0  -6   3 -1.7878 14.2077  -2
   0  -6   2 -1.7878 14.2077   1
   1  -6   2 90.4283 13.6869  -2
   1  -6   2 90.4283 13.6869   1
   2  -6   2 -25.891 7.79233  -2
   2  -6   2 -25.891 7.79233   1
   3  -6   2 3.22360 5.11751  -2
   3  -6   2 3.22360 5.11751   1
   4  -6   2 1829.19 27.7017  -2
   4  -6   2 1829.19 27.7017   1
   5  -6   2 19.2051 7.67442  -2
   5  -6   2 19.2051 7.67442   1
   6  -6   2 240.268 12.6491  -2
   6  -6   2 240.268 12.6491   1
   7  -6   2 63.4300 15.7541  -2
   7  -6   2 63.4300 15.7541   1
   8  -6   1 129.749 20.8873  -2
   8  -6   2 129.749 20.8873   1
   9  -6   1 184.583 16.7840  -2
   9  -6   2 184.583 16.7840   1
  10  -6   1 49.7891 15.8023  -2
  10  -6   2 49.7891 15.8023   1
  -7  -5   4 61.3152 39.4710  -2
  -7  -5   2 61.3152 39.4710   1
  -6  -5   3 68.3657 21.0289  -2
  -6  -5   2 68.3657 21.0289   1
  -5  -5   3 61.4266 11.7776  -2
  -5  -5   2 61.4266 11.7776   1
  -4  -5   3 30.9826 9.90156  -2
  -4  -5   2 30.9826 9.90156   1
  -3  -5   3 45.8728 8.72849  -2
  -3  -5   2 45.8728 8.72849   1
  -2  -5   3 169.863 15.3059  -2
  -2  -5   2 169.863 15.3059   1
  -1  -5   3 982.157 32.3717  -2
  -1  -5   2 982.157 32.3717   1
   0  -5   2 159.633 4.62015   1
   1  -5   2 21.2697 8.88859  -2
   1  -5   2 21.2697 8.88859   1
   2  -5   2 1035.70 18.7476  -2
   2  -5   2 1035.70 18.7476   1
   3  -5   2 467.512 10.5846  -2
   3  -5   2 467.512 10.5846   1
   4  -5   2 4002.16 48.5946  -2
   4  -5   2 4002.16 48.5946   1
   5  -5   2 36.9910 7.04037  -2
   5  -5   2 36.9910 7.04037   1
   6  -5   2 25.8892 10.2861  -2
   6  -5   2 25.8892 10.2861   1
   7  -5   1 231.629 36.6473  -2
   7  -5   2 231.629 36.6473   1
   7  -5   2 -12.088 56.7242  -2
   7  -5   2 -12.088 56.7242   1
   8  -5   1 201.748 20.2392  -2
   8  -5   2 201.748 20.2392   1
   9  -5   1 268.738 17.4397  -2
   9  -5   2 268.738 17.4397   1
  10  -5   1 23.2401 17.8081  -2
  10  -5   2 23.2401 17.8081   1
  -8  -4   4 117.570 30.4403  -2
  -8  -4   2 117.570 30.4403   1
  -7  -4   3 143.204 37.5624  -2
  -7  -4   2 143.204 37.5624   1
  -6  -4   3 187.067 17.5070  -2
  -6  -4   2 187.067 17.5070   1
  -5  -4   3 654.826 18.3873  -2
  -5  -4   2 654.826 18.3873   1
  -4  -4   3 785.312 18.9440  -2
  -4  -4   2 785.312 18.9440   1
  -3  -4   3 -2.2531 8.39351  -2
  -3  -4   2 -2.2531 8.39351   1
  -2  -4   3 288.576 19.0763  -2
  -2  -4   2 288.576 19.0763   1
  -1  -4   2 852.250 10.8761   1
   0  -4   2 97.0107 14.9905  -2
   0  -4   2 97.0107 14.9905   1
   1  -4   2 828.606 16.4834  -2
   1  -4   2 828.606 16.4834   1
   2  -4   2 49.1781 5.30941  -2
   2  -4   2 49.1781 5.30941   1
   3  -4   2 439.068 10.6770  -2
   3  -4   2 439.068 10.6770   1
   4  -4   2 -4.2561 5.57762  -2
   4  -4   2 -4.2561 5.57762   1
   5  -4   2 1021.91 26.9396  -2
   5  -4   2 1021.91 26.9396   1
   6  -4   1 -46.743 49.9416  -2
   6  -4   2 -46.743 49.9416   1
   6  -4   2 69.3653 33.0152  -2
   6  -4   2 69.3653 33.0152   1
   7  -4   1 190.671 17.6698  -2
   7  -4   2 190.671 17.6698   1
   8  -4   1 804.096 23.0639  -2
   8  -4   2 804.096 23.0639   1
   9  -4   1 35.7434 16.0588  -2
   9  -4   2 35.7434 16.0588   1
  10  -4   1 43.6822 17.4926  -2
  10  -4   2 43.6822 17.4926   1
  -9  -3   4 372.958 56.2570  -2
  -9  -3   2 372.958 56.2570   1
  -8  -3   4 5.49730 79.4687  -2
  -8  -3   2 5.49730 79.4687   1
  -8  -3   3 104.069 42.6443  -2
  -8  -3   2 104.069 42.6443   1
  -7  -3   3 201.094 21.3836  -2
  -7  -3   2 201.094 21.3836   1
  -6  -3   3 6.19100 12.2869  -2
  -6  -3   2 6.19100 12.2869   1
  -5  -3   3 226.902 11.8108  -2
  -5  -3   2 226.902 11.8108   1
  -4  -3   3 31.3463 10.3885  -2
  -4  -3   2 31.3463 10.3885   1
  -3  -3   3 326.927 22.0130  -2
  -3  -3   2 326.927 22.0130   1
  -2  -3   2 2.68427 3.50640   1
  -1  -3   2 71.1495 3.32419   1
   0  -3   2 1425.77 25.0764  -2
   0  -3   2 1425.77 25.0764   1
   1  -3   2 2228.52 27.9260  -2
   1  -3   2 2228.52 27.9260   1
   2  -3   2 67.0143 3.89772  -2
   2  -3   2 67.0143 3.89772   1
   3  -3   2 817.005 13.8637  -2
   3  -3   2 817.005 13.8637   1
   4  -3   2 11.7626 16.0844  -2
   4  -3   2 11.7626 16.0844   1
   5  -3   2 311.351 28.4022  -2
   5  -3   2 311.351 28.4022   1
   6  -3   1 9.16342 20.7898  -2
   6  -3   2 9.16342 20.7898   1
   7  -3   1 13.2531 14.2187  -2
   7  -3   2 13.2531 14.2187   1
   8  -3   1 42.9198 12.3456  -2
   8  -3   2 42.9198 12.3456   1
   9  -3   1 46.0770 17.9109  -2
   9  -3   2 46.0770 17.9109   1
  10  -3   1 -30.932 17.6187  -2
  10  -3   2 -30.932 17.6187   1
  -9  -2   4 185.209 101.380  -2
  -9  -2   2 185.209 101.380   1
  -9  -2   3 739.987 117.235  -2
  -9  -2   2 739.987 117.235   1
  -8  -2   3 46.8314 22.0447  -2
  -8  -2   2 46.8314 22.0447   1
  -7  -2   3 100.455 16.9756  -2
  -7  -2   2 100.455 16.9756   1
  -6  -2   3 17.4095 12.5046  -2
  -6  -2   2 17.4095 12.5046   1
  -5  -2   3 206.401 12.3860  -2
  -5  -2   2 206.401 12.3860   1
  -4  -2   3 304.286 19.0697  -2
  -4  -2   2 304.286 19.0697   1
  -3  -2   2 84.3918 5.34511   1
  -2  -2   2 25.6222 2.82740   1
  -1  -2   2 523.577 24.5343  -2
  -1  -2   2 523.577 24.5343   1
   0  -2   2 83.4007 5.44223  -2
   0  -2   2 83.4007 5.44223   1
   1  -2   2 4256.06 40.2960  -2
   1  -2   2 4256.06 40.2960   1
   2  -2   2 3.02705 6.31457  -2
   2  -2   2 3.02705 6.31457   1
   3  -2   2 24.1238 16.2032  -2
   3  -2   2 24.1238 16.2032   1
   4  -2   2 -26.939 28.3575  -2
   4  -2   2 -26.939 28.3575   1
   5  -2   2 40.2963 5.41272   1
   6  -2   1 26.5688 11.3996  -2
   6  -2   2 26.5688 11.3996   1
   7  -2   1 54.6965 12.8681  -2
   7  -2   2 54.6965 12.8681   1
   8  -2   1 96.4718 13.7780  -2
   8  -2   2 96.4718 13.7780   1
   9  -2   1 423.268 20.3587  -2
   9  -2   2 423.268 20.3587   1
  10  -2   1 100.935 23.8575  -2
  10  -2   2 100.935 23.8575   1
  -9  -1   3 280.359 41.6310  -2
  -9  -1   2 280.359 41.6310   1
  -8  -1   3 116.523 20.7350  -2
  -8  -1   2 116.523 20.7350   1
  -7  -1   3 18.8865 13.5237  -2
  -7  -1   2 18.8865 13.5237   1
  -6  -1   3 177.969 14.2529  -2
  -6  -1   2 177.969 14.2529   1
  -5  -1   3 188.518 13.0392  -2
  -5  -1   2 188.518 13.0392   1
  -4  -1   3 830.283 50.4017  -2
  -4  -1   2 830.283 50.4017   1
  -3  -1   2 78.0470 5.14370   1
  -2  -1   2 303.266 7.07306   1
  -1  -1   2 5553.10 157.364  -2
  -1  -1   2 5553.10 157.364   1
   0  -1   2 369.401 23.1513  -2
   0  -1   2 369.401 23.1513   1
   1  -1   2 853.408 21.3644  -2
   1  -1   2 853.408 21.3644   1
   2  -1   2 -1.0189 2.64175   1
   3  -1   2 153.231 6.19685   1
   4  -1   2 114.704 7.01960   1
   5  -1   1 1006.46 42.9804  -2
   5  -1   2 1006.46 42.9804   1
   6  -1   1 127.519 12.1781  -2
   6  -1   2 127.519 12.1781   1
   7  -1   1 705.734 21.1146  -2
   7  -1   2 705.734 21.1146   1
   8  -1   1 135.670 15.1515  -2
   8  -1   2 135.670 15.1515   1
   9  -1   1 473.581 30.1069  -2
   9  -1   2 473.581 30.1069   1
  10  -1   1 35.6087 32.6781  -2
  10  -1   2 35.6087 32.6781   1
 -10   0   3 124.924 51.7609  -2
 -10   0   2 124.924 51.7609   1
  -9   0   3 152.209 27.5610  -2
  -9   0   2 152.209 27.5610   1
  -8   0   3 165.804 21.2999  -2
  -8   0   2 165.804 21.2999   1
  -7   0   3 49.5014 14.7151  -2
  -7   0   2 49.5014 14.7151   1
  -6   0   3 522.245 22.2050  -2
  -6   0   2 522.245 22.2050   1
  -5   0   3 274.638 24.3879  -2
  -5   0   2 274.638 24.3879   1
  -4   0   2 459.058 11.7287   1
  -3   0   2 345.137 7.43208   1
  -2   0   2 2060.62 21.8368   1
  -1   0   2 290.663 6.05924   1
   0   0   2 3424.34 30.6109   1
   1   0   2 1114.82 11.6212   1
   2   0   2 506.100 8.38867   1
   3   0   2 168.301 7.17437   1
   4   0   2 5.15341 2.62638   1
   5   0   1 1782.01 33.0461  -2
   5   0   2 1782.01 33.0461   1
   6   0   1 88.7550 12.9831  -2
   6   0   2 88.7550 12.9831   1
   7   0   1 285.856 16.5591  -2
   7   0   2 285.856 16.5591   1
   8   0   1 32.4364 14.8049  -2
   8   0   2 32.4364 14.8049   1
   9   0   1 89.1671 24.8424  -2
   9   0   2 89.1671 24.8424   1
 -10   1   3 79.9462 34.9316  -2
 -10   1   2 79.9462 34.9316   1
  -9   1   3 45.7223 24.8762  -2
  -9   1   2 45.7223 24.8762   1
  -8   1   3 47.0316 16.1518  -2
  -8   1   2 47.0316 16.1518   1
  -7   1   3 -0.4068 13.3636  -2
  -7   1   2 -0.4068 13.3636   1
  -6   1   3 91.3626 15.4614  -2
  -6   1   2 91.3626 15.4614   1
  -5   1   3 446.137 37.8124  -2
  -5   1   2 446.137 37.8124   1
  -4   1   2 16.9017 4.68590   1
  -3   1   2 2.02688 20.8683  -2
  -3   1   2 2.02688 20.8683   1
  -2   1   2 44.4195 14.3062  -2
  -2   1   2 44.4195 14.3062   1
  -1   1   2 59.8370 9.33667  -2
  -1   1   2 59.8370 9.33667   1
   0   1   2 7.85298 7.99316  -2
   0   1   2 7.85298 7.99316   1
   1   1   2 541.415 6.58107   1
   2   1   2 10.7104 2.76753   1
   3   1   2 176.610 6.98944   1
   4   1   1 64.4928 15.0822  -2
   4   1   2 64.4928 15.0822   1
   5   1   1 259.769 13.1341  -2
   5   1   2 259.769 13.1341   1
   6   1   1 266.585 13.7481  -2
   6   1   2 266.585 13.7481   1
   7   1   1 26.9232 13.9636  -2
   7   1   2 26.9232 13.9636   1
   8   1   1 122.398 22.4853  -2
   8   1   2 122.398 22.4853   1
   9   1   1 156.534 33.3476  -2
   9   1   2 156.534 33.3476   1
 -10   2   3 -2.4424 31.1088  -2
 -10   2   2 -2.4424 31.1088   1
  -9   2   3 84.1363 18.1702  -2
  -9   2   2 84.1363 18.1702   1
  -8   2   3 66.6724 17.3066  -2
  -8   2   2 66.6724 17.3066   1
  -7   2   3 243.055 16.2281  -2
  -7   2   2 243.055 16.2281   1
  -6   2   3 304.656 30.3636  -2
  -6   2   2 304.656 30.3636   1
  -5   2   2 130.727 6.59777   1
  -4   2   2 2154.36 111.040  -2
  -4   2   2 2154.36 111.040   1
  -3   2   2 -15.005 13.2745  -2
  -3   2   2 -15.005 13.2745   1
  -2   2   2 1759.07 30.6927  -2
  -2   2   2 1759.07 30.6927   1
  -1   2   2 2732.80 43.9367  -2
  -1   2   2 2732.80 43.9367   1
   0   2   2 133.332 12.8447  -2
   0   2   2 133.332 12.8447   1
   1   2   2 71.3671 3.10311   1
   2   2   2 98.7832 4.53480   1
   3   2   1 174.276 28.3937  -2
   3   2   2 174.276 28.3937   1
   4   2   1 129.735 11.4333  -2
   4   2   2 129.735 11.4333   1
   5   2   1 328.432 16.5862  -2
   5   2   2 328.432 16.5862   1
   6   2   1 19.6229 11.4360  -2
   6   2   2 19.6229 11.4360   1
   7   2   1 2.89732 17.9521  -2
   7   2   2 2.89732 17.9521   1
   8   2   1 54.4377 28.1065  -2
   8   2   2 54.4377 28.1065   1
   9   2   1 104.269 83.5866  -2
   9   2   2 104.269 83.5866   1
 -10   3   3 19.5781 25.7034  -2
 -10   3   2 19.5781 25.7034   1
  -9   3   3 -8.9320 28.7431  -2
  -9   3   2 -8.9320 28.7431   1
  -8   3   3 50.7142 16.4246  -2
  -8   3   2 50.7142 16.4246   1
  -7   3   3 1133.98 50.6221  -2
  -7   3   2 1133.98 50.6221   1
  -6   3   3 157.527 41.3886  -2
  -6   3   2 157.527 41.3886   1
  -5   3   2 84.3992 5.75903   1
  -4   3   2 411.000 17.0587  -2
  -4   3   2 411.000 17.0587   1
  -3   3   2 28.9364 11.2324  -2
  -3   3   2 28.9364 11.2324   1
  -2   3   2 -8.4128 7.43282  -2
  -2   3   2 -8.4128 7.43282   1
  -1   3   2 975.804 25.9205  -2
  -1   3   2 975.804 25.9205   1
   0   3   2 687.758 28.5819  -2
   0   3   2 687.758 28.5819   1
   1   3   2 410.564 6.66866   1
   2   3   2 238.833 6.36870   1
   3   3   1 38.3271 9.03300  -2
   3   3   2 38.3271 9.03300   1
   4   3   1 391.769 12.7331  -2
   4   3   2 391.769 12.7331   1
   5   3   1 169.852 12.7942  -2
   5   3   2 169.852 12.7942   1
   6   3   1 34.7883 13.3075  -2
   6   3   2 34.7883 13.3075   1
   7   3   1 45.6448 23.9708  -2
   7   3   2 45.6448 23.9708   1
   8   3   2 11.1785 7.20583   1
 -10   4   3 -3.6266 26.8954  -2
 -10   4   2 -3.6266 26.8954   1
  -9   4   3 79.1593 20.5825  -2
  -9   4   2 79.1593 20.5825   1
  -8   4   3 753.271 33.1969  -2
  -8   4   2 753.271 33.1969   1
  -7   4   3 228.452 65.3316  -2
  -7   4   2 228.452 65.3316   1
  -6   4   2 126.343 6.50831   1
  -5   4   2 627.826 11.1817   1
  -4   4   2 35.8231 13.7671  -2
  -4   4   2 35.8231 13.7671   1
  -3   4   2 4516.91 71.2282  -2
  -3   4   2 4516.91 71.2282   1
  -2   4   2 129.221 12.5760  -2
  -2   4   2 129.221 12.5760   1
  -1   4   2 131.567 15.5682  -2
  -1   4   2 131.567 15.5682   1
   0   4   2 92.9950 3.13104   1
   1   4   2 809.078 10.8890   1
   2   4   1 34.8339 13.2208  -2
   2   4   2 34.8339 13.2208   1
   3   4   1 33.2631 9.29717  -2
   3   4   2 33.2631 9.29717   1
   4   4   1 350.621 14.1835  -2
   4   4   2 350.621 14.1835   1
   5   4   1 793.786 21.3534  -2
   5   4   2 793.786 21.3534   1
   6   4   1 383.363 22.0954  -2
   6   4   2 383.363 22.0954   1
   7   4   2 33.0413 6.60390   1
   8   4   0 -35.391 88.1228  -2
   8   4   2 -35.391 88.1228   1
 -10   5   3 23.0901 46.2490  -2
 -10   5   2 23.0901 46.2490   1
  -9   5   3 97.6008 19.0666  -2
  -9   5   2 97.6008 19.0666   1
  -8   5   3 61.3839 45.8454  -2
  -8   5   2 61.3839 45.8454   1
  -7   5   2 150.876 8.15322   1
  -6   5   2 34.3066 4.88832   1
  -5   5   2 -2.3069 16.0732  -2
  -5   5   2 -2.3069 16.0732   1
  -4   5   2 550.157 18.7552  -2
  -4   5   2 550.157 18.7552   1
  -3   5   2 -2.7075 9.71286  -2
  -3   5   2 -2.7075 9.71286   1
  -2   5   2 48.6919 3.11813   1
  -1   5   2 -0.2174 2.96484   1
   0   5   2 254.634 5.33323   1
   1   5   2 1589.31 16.4544   1
   2   5   1 125.395 12.1073  -2
   2   5   2 125.395 12.1073   1
   3   5   1 117.483 11.7811  -2
   3   5   2 117.483 11.7811   1
   4   5   1 245.472 17.0972  -2
   4   5   2 245.472 17.0972   1
   5   5   1 54.3101 18.2258  -2
   5   5   2 54.3101 18.2258   1
   6   5   1 112.783 43.6039  -2
   6   5   2 112.783 43.6039   1
   7   5   1 24.2085 41.8851  -2
   7   5   2 24.2085 41.8851   1
 -10   6   3 -10.870 30.0987  -2
 -10   6   2 -10.870 30.0987   1
  -9   6   3 122.240 49.1684  -2
  -9   6   2 122.240 49.1684   1
  -8   6   2 36.3973 5.74262   1
  -7   6   2 10.7750 5.01850   1
  -6   6   2 155.662 6.80626   1
  -5   6   2 23.9243 19.5526  -2
  -5   6   2 23.9243 19.5526   1
  -4   6   2 345.603 17.4651  -2
  -4   6   2 345.603 17.4651   1
  -3   6   2 19.3371 13.5814  -2
  -3   6   2 19.3371 13.5814   1
  -2   6   2 74.6511 5.45080   1
  -1   6   2 108.428 6.19511   1
   0   6   2 37.2139 2.79521   1
   1   6   1 620.824 28.1813  -2
   1   6   2 620.824 28.1813   1
   2   6   1 103.831 14.2339  -2
   2   6   2 103.831 14.2339   1
   3   6   1 48.5595 19.2185  -2
   3   6   2 48.5595 19.2185   1
   4   6   1 63.0532 26.2003  -2
   4   6   2 63.0532 26.2003   1
   5   6   2 4.49551 5.14357   1
   6   6   2 172.682 10.0682   1
  -9   7   2 59.9752 6.53347   1
  -8   7   2 90.0757 7.74237   1
  -7   7   2 29.0312 5.63431   1
  -6   7   2 97.8491 6.89947   1
  -5   7   2 60.0093 23.7493  -2
  -5   7   2 60.0093 23.7493   1
  -4   7   2 17.9828 2.83037   1
  -3   7   2 64.8397 3.59310   1
  -2   7   2 41.7841 5.09969   1
  -1   7   2 7.56534 3.89320   1
   0   7   2 11.3765 1.76377   1
   1   7   1 326.404 29.3721  -2
   1   7   2 326.404 29.3721   1
   2   7   1 151.915 19.5669  -2
   2   7   2 151.915 19.5669   1
   3   7   1 163.990 23.3779  -2
   3   7   2 163.990 23.3779   1
   4   7   1 49.9388 34.2964  -2
   4   7   2 49.9388 34.2964   1
   5   7   2 13.0030 5.57209   1
  -9   8   2 12.1950 6.03887   1
  -8   8   2 23.7416 6.46702   1
  -7   8   2 105.109 7.73846   1
  -6   8   2 0.86977 4.11451   1
  -5   8   2 17.8683 3.55064   1
  -4   8   2 69.5293 4.69852   1
  -3   8   2 408.913 11.6989   1
  -2   8   2 2.15226 4.64054   1
  -1   8   2 259.368 10.8232   1
   0   8   2 17.5321 4.45345   1
   1   8   2 6.95415 3.84917   1
   2   8   1 40.3930 33.8083  -2
   2   8   2 40.3930 33.8083   1
   3   8   2 248.583 10.8864   1
   4   8   1 62.8614 52.1560  -2
   4   8   2 62.8614 52.1560   1
  -8   9   2 0.35857 5.36270   1
  -7   9   2 6.44237 4.84631   1
  -6   9   2 1.20306 4.14415   1
  -5   9   2 65.4239 5.37880   1
  -4   9   2 44.6534 6.91148   1
  -3   9   2 3.37807 4.93224   1
  -2   9   2 189.080 9.93180   1
  -1   9   2 50.7781 4.85118   1
   0   9   2 23.4510 5.16870   1
   1   9   2 87.6481 5.02428   1
   2   9   2 21.3784 4.26645   1
   3   9   2 33.7899 4.49887   1
  -7  10   2 3.96878 4.06021   1
  -6  10   2 7.52152 4.58334   1
  -5  10   2 20.9673 6.68556   1
  -4  10   2 91.6306 7.83375   1
  -3  10   2 218.775 10.4235   1
  -2  10   2 15.5824 6.17209   1
  -1  10   2 -3.3155 3.89274   1
   0  10   2 29.5422 6.12335   1
   1  10   2 21.3350 7.57453   1
  -5  11   2 23.4921 7.87955   1
  -4  11   2 10.7877 5.83616   1
  -3  11   2 42.7353 5.51882   1
  -2  11   2 47.1054 8.49534   1
  -1  11   1 20.7235 54.1644  -2
  -1  11   2 20.7235 54.1644   1
   0 -11   4 13.9429 24.0932  -2
   0 -11   3 13.9429 24.0932   1
   1 -11   4 -5.2423 12.9754  -2
   1 -11   3 -5.2423 12.9754   1
   2 -11   4 9.40483 13.6440  -2
   2 -11   3 9.40483 13.6440   1
   3 -11   4 180.822 23.2076  -2
   3 -11   3 180.822 23.2076   1
   4 -11   4 -9.0572 28.0389  -2
   4 -11   3 -9.0572 28.0389   1
   4 -11   3 -40.678 21.4679  -2
   4 -11   3 -40.678 21.4679   1
   5 -11   3 1.93002 10.9217  -2
   5 -11   3 1.93002 10.9217   1
   6 -11   3 -6.3333 12.6499  -2
   6 -11   3 -6.3333 12.6499   1
  -2 -10   4 26.8536 15.0379  -2
  -2 -10   3 26.8536 15.0379   1
  -1 -10   4 104.252 19.3211  -2
  -1 -10   3 104.252 19.3211   1
   0 -10   4 36.1545 15.6807  -2
   0 -10   3 36.1545 15.6807   1
   1 -10   4 134.847 21.2448  -2
   1 -10   3 134.847 21.2448   1
   2 -10   4 51.9989 15.5567  -2
   2 -10   3 51.9989 15.5567   1
   3 -10   3 24.1266 57.4978  -2
   3 -10   3 24.1266 57.4978   1
   3 -10   4 135.477 78.8380  -2
   3 -10   3 135.477 78.8380   1
   4 -10   3 -21.294 10.9962  -2
   4 -10   3 -21.294 10.9962   1
   5 -10   3 -8.6386 9.70373  -2
   5 -10   3 -8.6386 9.70373   1
   6 -10   3 5.96224 10.2572  -2
   6 -10   3 5.96224 10.2572   1
   7 -10   3 43.1173 15.9030  -2
   7 -10   3 43.1173 15.9030   1
  -4  -9   5 12.6871 59.4905  -2
  -4  -9   3 12.6871 59.4905   1
  -3  -9   4 163.437 24.1643  -2
  -3  -9   3 163.437 24.1643   1
  -2  -9   4 116.236 14.9996  -2
  -2  -9   3 116.236 14.9996   1
  -1  -9   4 294.715 11.9947  -2
  -1  -9   3 294.715 11.9947   1
   0  -9   4 168.627 6.96386  -2
   0  -9   3 168.627 6.96386   1
   1  -9   4 17.5677 13.5544  -2
   1  -9   3 17.5677 13.5544   1
   2  -9   4 64.3498 17.8293  -2
   2  -9   3 64.3498 17.8293   1
   3  -9   3 558.452 24.7928  -2
   3  -9   3 558.452 24.7928   1
   4  -9   3 375.758 12.6583  -2
   4  -9   3 375.758 12.6583   1
   5  -9   3 39.2519 8.58482  -2
   5  -9   3 39.2519 8.58482   1
   6  -9   3 34.4309 11.9695  -2
   6  -9   3 34.4309 11.9695   1
   7  -9   3 48.8458 16.2141  -2
   7  -9   3 48.8458 16.2141   1
   8  -9   3 7.95799 19.1292  -2
   8  -9   3 7.95799 19.1292   1
  -5  -8   4 244.014 78.2278  -2
  -5  -8   3 244.014 78.2278   1
  -5  -8   5 222.722 48.8519  -2
  -5  -8   3 222.722 48.8519   1
  -4  -8   4 48.8022 35.4807  -2
  -4  -8   3 48.8022 35.4807   1
  -3  -8   4 187.146 15.9515  -2
  -3  -8   3 187.146 15.9515   1
  -2  -8   4 317.900 13.4678  -2
  -2  -8   3 317.900 13.4678   1
  -1  -8   4 39.3062 5.14882  -2
  -1  -8   3 39.3062 5.14882   1
   0  -8   4 55.6512 7.96469  -2
   0  -8   3 55.6512 7.96469   1
   1  -8   4 239.811 14.7443  -2
   1  -8   3 239.811 14.7443   1
   2  -8   4 381.876 29.7010  -2
   2  -8   3 381.876 29.7010   1
   3  -8   3 29.5333 8.23456  -2
   3  -8   3 29.5333 8.23456   1
   4  -8   3 535.921 12.9765  -2
   4  -8   3 535.921 12.9765   1
   5  -8   3 31.8274 10.6000  -2
   5  -8   3 31.8274 10.6000   1
   6  -8   3 11.7292 11.8612  -2
   6  -8   3 11.7292 11.8612   1
   7  -8   3 7.10163 14.2382  -2
   7  -8   3 7.10163 14.2382   1
   8  -8   3 61.5412 20.1359  -2
   8  -8   3 61.5412 20.1359   1
   9  -8   2 30.9361 39.5479  -2
   9  -8   3 30.9361 39.5479   1
   9  -8   3 63.5584 59.1736  -2
   9  -8   3 63.5584 59.1736   1
  -6  -7   5 2.89517 33.5403  -2
  -6  -7   3 2.89517 33.5403   1
  -5  -7   4 147.159 41.3925  -2
  -5  -7   3 147.159 41.3925   1
  -4  -7   4 198.394 18.1151  -2
  -4  -7   3 198.394 18.1151   1
  -3  -7   4 130.980 13.0388  -2
  -3  -7   3 130.980 13.0388   1
  -2  -7   4 65.0038 9.84985  -2
  -2  -7   3 65.0038 9.84985   1
  -1  -7   4 92.7693 8.27366  -2
  -1  -7   3 92.7693 8.27366   1
   0  -7   4 -5.5146 4.68026  -2
   0  -7   3 -5.5146 4.68026   1
   1  -7   4 502.834 42.8178  -2
   1  -7   3 502.834 42.8178   1
   1  -7   3 463.803 31.3935  -2
   1  -7   3 463.803 31.3935   1
   2  -7   3 311.410 14.4599  -2
   2  -7   3 311.410 14.4599   1
   3  -7   3 4.58487 6.33649  -2
   3  -7   3 4.58487 6.33649   1
   4  -7   3 519.436 15.0195  -2
   4  -7   3 519.436 15.0195   1
   5  -7   3 4.84244 8.54574  -2
   5  -7   3 4.84244 8.54574   1
   6  -7   3 187.033 14.3637  -2
   6  -7   3 187.033 14.3637   1
   7  -7   3 13.4698 12.6802  -2
   7  -7   3 13.4698 12.6802   1
   8  -7   3 50.2672 15.0358  -2
   8  -7   3 50.2672 15.0358   1
   8  -7   2 40.6308 71.1785  -2
   8  -7   3 40.6308 71.1785   1
   9  -7   2 5.52030 23.7791  -2
   9  -7   3 5.52030 23.7791   1
  -7  -6   5 22.7359 29.2556  -2
  -7  -6   3 22.7359 29.2556   1
  -6  -6   4 114.478 66.1105  -2
  -6  -6   3 114.478 66.1105   1
  -5  -6   4 151.206 18.7224  -2
  -5  -6   3 151.206 18.7224   1
  -4  -6   4 119.214 13.6583  -2
  -4  -6   3 119.214 13.6583   1
  -3  -6   4 113.462 13.3097  -2
  -3  -6   3 113.462 13.3097   1
  -2  -6   4 56.0240 11.8225  -2
  -2  -6   3 56.0240 11.8225   1
  -1  -6   4 274.375 13.0831  -2
  -1  -6   3 274.375 13.0831   1
   0  -6   4 18.8407 9.82841  -2
   0  -6   3 18.8407 9.82841   1
   1  -6   3 211.726 14.9769  -2
   1  -6   3 211.726 14.9769   1
   2  -6   3 169.639 7.34728  -2
   2  -6   3 169.639 7.34728   1
   3  -6   3 15.1837 5.15359  -2
   3  -6   3 15.1837 5.15359   1
   4  -6   3 729.114 17.0741  -2
   4  -6   3 729.114 17.0741   1
   5  -6   3 126.282 9.44820  -2
   5  -6   3 126.282 9.44820   1
   6  -6   3 744.589 21.7968  -2
   6  -6   3 744.589 21.7968   1
   7  -6   3 118.317 16.1260  -2
   7  -6   3 118.317 16.1260   1
   8  -6   2 36.4483 18.9961  -2
   8  -6   3 36.4483 18.9961   1
   9  -6   2 88.9252 18.3146  -2
   9  -6   3 88.9252 18.3146   1
  10  -6   2 48.8032 18.4643  -2
  10  -6   3 48.8032 18.4643   1
  -7  -5   5 22.4824 29.7567  -2
  -7  -5   3 22.4824 29.7567   1
  -6  -5   4 108.299 21.2132  -2
  -6  -5   3 108.299 21.2132   1
  -5  -5   4 154.350 13.3734  -2
  -5  -5   3 154.350 13.3734   1
  -4  -5   4 235.044 14.2963  -2
  -4  -5   3 235.044 14.2963   1
  -3  -5   4 32.1927 9.47503  -2
  -3  -5   3 32.1927 9.47503   1
  -2  -5   4 178.469 11.6595  -2
  -2  -5   3 178.469 11.6595   1
  -1  -5   4 37.4545 15.2814  -2
  -1  -5   3 37.4545 15.2814   1
   0  -5   3 443.559 32.5174  -2
   0  -5   3 443.559 32.5174   1
   1  -5   3 354.354 9.37008  -2
   1  -5   3 354.354 9.37008   1
   2  -5   3 521.193 11.1314  -2
   2  -5   3 521.193 11.1314   1
   3  -5   3 80.8324 6.27184  -2
   3  -5   3 80.8324 6.27184   1
   4  -5   3 34.8348 7.07494  -2
   4  -5   3 34.8348 7.07494   1
   5  -5   3 1108.23 20.8959  -2
   5  -5   3 1108.23 20.8959   1
   6  -5   3 475.141 17.8520  -2
   6  -5   3 475.141 17.8520   1
   7  -5   2 48.8414 25.7540  -2
   7  -5   3 48.8414 25.7540   1
   7  -5   3 15.3200 54.5101  -2
   7  -5   3 15.3200 54.5101   1
   8  -5   2 259.101 15.2792  -2
   8  -5   3 259.101 15.2792   1
   9  -5   2 331.161 17.1289  -2
   9  -5   3 331.161 17.1289   1
  10  -5   2 62.7656 14.4602  -2
  10  -5   3 62.7656 14.4602   1
  -8  -4   5 30.7558 27.7316  -2
  -8  -4   3 30.7558 27.7316   1
  -7  -4   4 75.3606 28.3876  -2
  -7  -4   3 75.3606 28.3876   1
  -6  -4   4 89.0539 15.6934  -2
  -6  -4   3 89.0539 15.6934   1
  -5  -4   4 510.030 20.0269  -2
  -5  -4   3 510.030 20.0269   1
  -4  -4   4 662.212 18.3280  -2
  -4  -4   3 662.212 18.3280   1
  -3  -4   4 8.68643 8.53516  -2
  -3  -4   3 8.68643 8.53516   1
  -2  -4   4 133.677 14.0745  -2
  -2  -4   3 133.677 14.0745   1
  -1  -4   4 402.722 48.6157  -2
  -1  -4   3 402.722 48.6157   1
   0  -4   3 6391.16 115.193  -2
   0  -4   3 6391.16 115.193   1
   1  -4   3 269.634 8.31628  -2
   1  -4   3 269.634 8.31628   1
   2  -4   3 18.2939 4.46421  -2
   2  -4   3 18.2939 4.46421   1
   3  -4   3 28.4281 5.50059  -2
   3  -4   3 28.4281 5.50059   1
   4  -4   3 322.439 10.6620  -2
   4  -4   3 322.439 10.6620   1
   5  -4   3 17.3157 14.5615  -2
   5  -4   3 17.3157 14.5615   1
   6  -4   2 283.448 34.0783  -2
   6  -4   3 283.448 34.0783   1
   6  -4   3 476.418 35.7399  -2
   6  -4   3 476.418 35.7399   1
   7  -4   2 41.0599 14.7997  -2
   7  -4   3 41.0599 14.7997   1
   8  -4   2 266.455 17.5485  -2
   8  -4   3 266.455 17.5485   1
   9  -4   2 69.7990 16.8454  -2
   9  -4   3 69.7990 16.8454   1
  10  -4   2 87.2359 20.1470  -2
  10  -4   3 87.2359 20.1470   1
  -9  -3   3 57.0997 18.3487   1
  -8  -3   4 73.2174 39.8782  -2
  -8  -3   3 73.2174 39.8782   1
  -7  -3   4 318.679 20.9775  -2
  -7  -3   3 318.679 20.9775   1
  -6  -3   4 40.4265 11.9862  -2
  -6  -3   3 40.4265 11.9862   1
  -5  -3   4 266.376 11.5482  -2
  -5  -3   3 266.376 11.5482   1
  -4  -3   4 647.459 19.1479  -2
  -4  -3   3 647.459 19.1479   1
  -3  -3   4 900.255 25.7896  -2
  -3  -3   3 900.255 25.7896   1
  -2  -3   3 1067.19 14.2838   1
  -1  -3   3 1307.49 68.0657  -2
  -1  -3   3 1307.49 68.0657   1
   0  -3   3 5219.74 84.9280  -2
   0  -3   3 5219.74 84.9280   1
   1  -3   3 7270.38 82.1274  -2
   1  -3   3 7270.38 82.1274   1
   2  -3   3 8.52697 4.50521  -2
   2  -3   3 8.52697 4.50521   1
   3  -3   3 130.821 9.18063  -2
   3  -3   3 130.821 9.18063   1
   4  -3   3 313.840 21.9087  -2
   4  -3   3 313.840 21.9087   1
   5  -3   3 79.0756 23.1457  -2
   5  -3   3 79.0756 23.1457   1
   6  -3   2 497.419 34.2311  -2
   6  -3   3 497.419 34.2311   1
   7  -3   2 28.8710 12.6346  -2
   7  -3   3 28.8710 12.6346   1
   8  -3   2 203.332 15.6749  -2
   8  -3   3 203.332 15.6749   1
   9  -3   2 108.020 17.4353  -2
   9  -3   3 108.020 17.4353   1
  10  -3   2 7.37097 18.6671  -2
  10  -3   3 7.37097 18.6671   1
  -9  -2   5 356.676 73.7418  -2
  -9  -2   3 356.676 73.7418   1
  -9  -2   4 311.037 95.6946  -2
  -9  -2   3 311.037 95.6946   1
  -8  -2   4 -2.0218 22.6706  -2
  -8  -2   3 -2.0218 22.6706   1
  -7  -2   4 64.0873 16.1293  -2
  -7  -2   3 64.0873 16.1293   1
  -6  -2   4 -2.6256 11.8376  -2
  -6  -2   3 -2.6256 11.8376   1
  -5  -2   4 136.655 9.75642  -2
  -5  -2   3 136.655 9.75642   1
  -4  -2   4 456.462 19.2367  -2
  -4  -2   3 456.462 19.2367   1
  -3  -2   4 567.025 40.6434  -2
  -3  -2   3 567.025 40.6434   1
  -2  -2   3 1590.48 82.2757  -2
  -2  -2   3 1590.48 82.2757   1
  -1  -2   3 7065.65 137.409  -2
  -1  -2   3 7065.65 137.409   1
   0  -2   3 59.7943 7.10404  -2
   0  -2   3 59.7943 7.10404   1
   1  -2   3 2067.43 26.2899  -2
   1  -2   3 2067.43 26.2899   1
   2  -2   3 751.286 15.9555  -2
   2  -2   3 751.286 15.9555   1
   3  -2   3 156.498 22.8320  -2
   3  -2   3 156.498 22.8320   1
   4  -2   3 187.876 55.2882  -2
   4  -2   3 187.876 55.2882   1
   5  -2   2 161.617 52.2083  -2
   5  -2   3 161.617 52.2083   1
   6  -2   2 57.1784 12.2284  -2
   6  -2   3 57.1784 12.2284   1
   7  -2   2 92.4753 13.2679  -2
   7  -2   3 92.4753 13.2679   1
   8  -2   2 55.5211 13.4267  -2
   8  -2   3 55.5211 13.4267   1
   9  -2   2 414.108 23.4569  -2
   9  -2   3 414.108 23.4569   1
  10  -2   2 52.7459 22.0698  -2
  10  -2   3 52.7459 22.0698   1
  -9  -1   4 196.667 40.7960  -2
  -9  -1   3 196.667 40.7960   1
  -8  -1   4 217.909 26.4566  -2
  -8  -1   3 217.909 26.4566   1
  -7  -1   4 140.797 15.3340  -2
  -7  -1   3 140.797 15.3340   1
  -6  -1   4 193.620 14.8782  -2
  -6  -1   3 193.620 14.8782   1
  -5  -1   4 95.0848 12.6538  -2
  -5  -1   3 95.0848 12.6538   1
  -4  -1   4 1386.57 66.5715  -2
  -4  -1   3 1386.57 66.5715   1
  -3  -1   3 197.628 6.78545   1
  -2  -1   3 3.11119 3.25469   1
  -1  -1   3 601.569 26.6821  -2
  -1  -1   3 601.569 26.6821   1
   0  -1   3 284.386 15.8981  -2
   0  -1   3 284.386 15.8981   1
   1  -1   3 638.228 9.44325   1
   2  -1   3 57.2597 4.00459   1
   3  -1   3 11.5723 3.49072   1
   4  -1   3 120.691 6.19191   1
   5  -1   2 52.4944 19.9919  -2
   5  -1   3 52.4944 19.9919   1
   6  -1   2 72.5236 12.2507  -2
   6  -1   3 72.5236 12.2507   1
   7  -1   2 697.664 19.3297  -2
   7  -1   3 697.664 19.3297   1
   8  -1   2 171.607 17.7953  -2
   8  -1   3 171.607 17.7953   1
   9  -1   2 121.841 22.7747  -2
   9  -1   3 121.841 22.7747   1
  10  -1   2 150.925 32.4490  -2
  10  -1   3 150.925 32.4490   1
 -10   0   4 185.921 94.5648  -2
 -10   0   3 185.921 94.5648   1
  -9   0   4 25.1665 32.8885  -2
  -9   0   3 25.1665 32.8885   1
  -8   0   4 106.721 20.0988  -2
  -8   0   3 106.721 20.0988   1
  -7   0   4 80.6076 11.8624  -2
  -7   0   3 80.6076 11.8624   1
  -6   0   4 48.4041 15.8682  -2
  -6   0   3 48.4041 15.8682   1
  -5   0   4 1.68004 19.4344  -2
  -5   0   3 1.68004 19.4344   1
  -4   0   3 55.5965 4.93891   1
  -3   0   3 777.188 11.8203   1
  -2   0   3 1254.36 16.9861   1
  -1   0   3 253.547 6.74029   1
   0   0   3 4.22755 1.77855   1
   1   0   3 1118.03 11.9549   1
   2   0   3 275.335 6.72504   1
   3   0   3 200.892 7.07254   1
   4   0   2 129.097 24.6953  -2
   4   0   3 129.097 24.6953   1
   5   0   2 1101.14 23.7994  -2
   5   0   3 1101.14 23.7994   1
   6   0   2 79.2814 12.9816  -2
   6   0   3 79.2814 12.9816   1
   7   0   2 26.6370 11.4460  -2
   7   0   3 26.6370 11.4460   1
   8   0   2 35.5039 21.6704  -2
   8   0   3 35.5039 21.6704   1
   9   0   2 86.1791 25.3855  -2
   9   0   3 86.1791 25.3855   1
 -10   1   4 64.7833 57.8610  -2
 -10   1   3 64.7833 57.8610   1
  -9   1   4 68.1535 22.3599  -2
  -9   1   3 68.1535 22.3599   1
  -8   1   4 14.9477 16.2593  -2
  -8   1   3 14.9477 16.2593   1
  -7   1   4 30.5841 13.7462  -2
  -7   1   3 30.5841 13.7462   1
  -6   1   4 116.649 16.7082  -2
  -6   1   3 116.649 16.7082   1
  -5   1   3 109.719 6.56974   1
  -4   1   3 393.005 9.92504   1
  -3   1   3 23.9909 23.0086  -2
  -3   1   3 23.9909 23.0086   1
  -2   1   3 925.536 30.3186  -2
  -2   1   3 925.536 30.3186   1
  -1   1   3 2027.99 52.4519  -2
  -1   1   3 2027.99 52.4519   1
   0   1   3 299.341 5.07274   1
   1   1   3 39.1730 2.51733   1
   2   1   3 -0.2132 2.16189   1
   3   1   3 29.5062 4.35874   1
   4   1   2 80.2665 11.2781  -2
   4   1   3 80.2665 11.2781   1
   5   1   2 239.233 12.8462  -2
   5   1   3 239.233 12.8462   1
   6   1   2 247.838 16.9712  -2
   6   1   3 247.838 16.9712   1
   7   1   2 -9.6035 13.7526  -2
   7   1   3 -9.6035 13.7526   1
   8   1   2 12.9740 22.6803  -2
   8   1   3 12.9740 22.6803   1
   9   1   2 -5.7346 45.6097  -2
   9   1   3 -5.7346 45.6097   1
 -10   2   4 121.565 67.9909  -2
 -10   2   3 121.565 67.9909   1
  -9   2   4 37.5396 30.0218  -2
  -9   2   3 37.5396 30.0218   1
  -8   2   4 367.777 23.2203  -2
  -8   2   3 367.777 23.2203   1
  -7   2   4 98.2958 19.9263  -2
  -7   2   3 98.2958 19.9263   1
  -6   2   4 31.8985 23.4138  -2
  -6   2   3 31.8985 23.4138   1
  -5   2   3 80.5942 5.77037   1
  -4   2   3 902.749 14.6159   1
  -3   2   3 295.880 26.2230  -2
  -3   2   3 295.880 26.2230   1
  -2   2   3 499.777 23.0565  -2
  -2   2   3 499.777 23.0565   1
  -1   2   3 1397.42 28.2771  -2
  -1   2   3 1397.42 28.2771   1
   0   2   3 269.554 15.8178  -2
   0   2   3 269.554 15.8178   1
   1   2   3 408.074 6.53398   1
   2   2   3 1.50249 2.52787   1
   3   2   2 267.929 24.9428  -2
   3   2   3 267.929 24.9428   1
   4   2   2 115.836 11.0831  -2
   4   2   3 115.836 11.0831   1
   5   2   2 12.6788 11.5266  -2
   5   2   3 12.6788 11.5266   1
   6   2   2 17.8232 11.7289  -2
   6   2   3 17.8232 11.7289   1
   7   2   2 30.4752 18.9442  -2
   7   2   3 30.4752 18.9442   1
   8   2   2 12.0286 32.4381  -2
   8   2   3 12.0286 32.4381   1
   9   2   3 34.2698 8.88124   1
 -10   3   4 2.62678 92.8514  -2
 -10   3   3 2.62678 92.8514   1
  -9   3   4 60.0312 31.4210  -2
  -9   3   3 60.0312 31.4210   1
  -8   3   4 49.4699 22.4561  -2
  -8   3   3 49.4699 22.4561   1
  -7   3   4 917.403 77.8341  -2
  -7   3   3 917.403 77.8341   1
  -6   3   3 36.3547 4.75402   1
  -5   3   3 96.2176 5.70600   1
  -4   3   3 39.6713 26.2616  -2
  -4   3   3 39.6713 26.2616   1
  -3   3   3 14.1073 14.5358  -2
  -3   3   3 14.1073 14.5358   1
  -2   3   3 2729.22 43.1979  -2
  -2   3   3 2729.22 43.1979   1
  -1   3   3 5376.24 107.144  -2
  -1   3   3 5376.24 107.144   1
   0   3   3 12.7603 2.17501   1
   1   3   3 530.917 7.38467   1
   2   3   3 29.5277 3.25402   1
   3   3   2 175.492 15.9255  -2
   3   3   3 175.492 15.9255   1
   4   3   2 140.470 10.0115  -2
   4   3   3 140.470 10.0115   1
   5   3   2 120.715 13.3899  -2
   5   3   3 120.715 13.3899   1
   6   3   2 -0.2633 14.7772  -2
   6   3   3 -0.2633 14.7772   1
   7   3   2 81.8894 39.9683  -2
   7   3   3 81.8894 39.9683   1
   8   3   2 -39.957 61.6276  -2
   8   3   3 -39.957 61.6276   1
 -10   4   4 47.0651 41.0036  -2
 -10   4   3 47.0651 41.0036   1
  -9   4   4 68.7218 25.8617  -2
  -9   4   3 68.7218 25.8617   1
  -8   4   4 524.558 74.5243  -2
  -8   4   3 524.558 74.5243   1
  -7   4   3 35.6621 4.89964   1
  -6   4   3 53.3828 5.18481   1
  -5   4   3 32.9561 4.28249   1
  -4   4   3 34.3962 15.8998  -2
  -4   4   3 34.3962 15.8998   1
  -3   4   3 297.888 27.4044  -2
  -3   4   3 297.888 27.4044   1
  -2   4   3 855.467 28.4576  -2
  -2   4   3 855.467 28.4576   1
  -1   4   3 183.034 3.82846   1
   0   4   3 124.113 3.81304   1
   1   4   3 364.753 7.26135   1
   2   4   3 3.92634 2.36782   1
   3   4   2 341.674 18.5117  -2
   3   4   3 341.674 18.5117   1
   4   4   2 355.496 16.1794  -2
   4   4   3 355.496 16.1794   1
   5   4   2 566.390 25.7127  -2
   5   4   3 566.390 25.7127   1
   6   4   2 316.232 35.7716  -2
   6   4   3 316.232 35.7716   1
   7   4   3 -1.6731 5.61083   1
   8   4   1 70.0752 68.7912  -2
   8   4   3 70.0752 68.7912   1
 -10   5   4 27.3629 58.9466  -2
 -10   5   3 27.3629 58.9466   1
  -9   5   4 31.1037 38.2815  -2
  -9   5   3 31.1037 38.2815   1
  -8   5   3 1.47097 4.75929   1
  -7   5   3 30.4128 4.66347   1
  -6   5   3 30.6856 5.12508   1
  -5   5   3 78.8861 5.03784   1
  -4   5   3 160.363 5.44232   1
  -3   5   3 -3.6846 15.3323  -2
  -3   5   3 -3.6846 15.3323   1
  -2   5   3 185.810 3.94778   1
  -1   5   3 7.67095 1.95573   1
   0   5   3 265.512 5.04000   1
   1   5   3 41.1337 3.14136   1
   2   5   2 181.659 26.1570  -2
   2   5   3 181.659 26.1570   1
   3   5   2 123.787 19.8904  -2
   3   5   3 123.787 19.8904   1
   4   5   2 112.695 18.4890  -2
   4   5   3 112.695 18.4890   1
   5   5   2 6.15189 34.9147  -2
   5   5   3 6.15189 34.9147   1
   6   5   2 50.9979 42.5321  -2
   6   5   3 50.9979 42.5321   1
   7   5   3 29.4150 7.14101   1
 -10   6   4 88.6743 37.4432  -2
 -10   6   3 88.6743 37.4432   1
  -9   6   3 4.10634 5.06178   1
  -8   6   3 252.793 10.0071   1
  -7   6   3 5.51956 4.92544   1
  -6   6   3 122.354 5.28467   1
  -5   6   3 2.57519 3.37425   1
  -4   6   3 10.2943 3.03898   1
  -3   6   3 363.580 36.4669  -2
  -3   6   3 363.580 36.4669   1
  -2   6   3 199.404 5.15096   1
  -1   6   3 125.463 3.87693   1
   0   6   3 54.0387 3.62455   1
   1   6   3 151.405 5.07780   1
   2   6   3 16.1463 3.50598   1
   3   6   2 88.6812 28.6081  -2
   3   6   3 88.6812 28.6081   1
   4   6   2 -48.374 41.2418  -2
   4   6   3 -48.374 41.2418   1
   5   6   3 24.3425 6.10631   1
   6   6   3 12.9529 5.16056   1
  -9   7   3 82.7774 7.85620   1
  -8   7   3 4.26966 3.47943   1
  -7   7   3 93.4202 6.57237   1
  -6   7   3 45.1674 5.01462   1
  -5   7   3 52.8121 4.87165   1
  -4   7   3 52.0284 3.93368   1
  -3   7   3 233.200 24.3622  -2
  -3   7   3 233.200 24.3622   1
  -2   7   3 387.110 8.75231   1
  -1   7   3 274.341 7.46712   1
   0   7   3 24.0504 3.27258   1
   1   7   3 7.41463 2.07259   1
   2   7   3 4.72439 3.15822   1
   3   7   2 165.920 35.1261  -2
   3   7   3 165.920 35.1261   1
   4   7   3 45.3354 5.90441   1
   5   7   3 2.87590 5.53056   1
  -9   8   3 3.46274 6.41248   1
  -8   8   3 25.9457 5.22168   1
  -7   8   3 230.040 9.84274   1
  -6   8   3 54.2192 6.03643   1
  -5   8   3 8.06704 3.11828   1
  -4   8   3 179.987 7.03286   1
  -3   8   3 317.528 10.2219   1
  -2   8   3 17.0058 2.93733   1
  -1   8   3 139.034 7.45070   1
   0   8   3 23.9526 5.40765   1
   1   8   3 252.049 8.51400   1
   2   8   3 27.2875 3.33722   1
   3   8   3 33.8423 4.81132   1
   4   8   3 89.9393 7.72865   1
  -8   9   3 -3.4956 5.30957   1
  -7   9   3 143.154 8.01667   1
  -6   9   3 206.771 8.18950   1
  -5   9   3 34.1208 4.59800   1
  -4   9   3 25.4202 6.20029   1
  -3   9   3 3.75168 3.94980   1
  -2   9   3 10.0846 3.19679   1
  -1   9   3 221.103 9.04101   1
   0   9   3 13.1701 5.02548   1
   1   9   3 21.7598 4.02100   1
   2   9   3 -0.7692 3.93019   1
   3   9   3 11.8538 3.98429   1
  -7  10   3 47.0123 4.94699   1
  -6  10   3 88.5966 5.20815   1
  -5  10   3 77.7537 8.56984   1
  -4  10   3 68.3707 7.47181   1
  -3  10   3 6.63513 4.15052   1
  -2  10   3 1.44117 4.20883   1
  -1  10   3 107.483 7.50442   1
   0  10   3 19.3576 5.86766   1
   1  10   3 0.28796 6.02473   1
  -5  11   3 47.9887 8.39438   1
  -4  11   3 39.0125 7.36992   1
  -3  11   3 31.3381 5.77502   1
  -2  11   3 55.0281 6.38465   1
   0 -11   5 44.0099 17.5351  -2
   0 -11   4 44.0099 17.5351   1
   1 -11   5 42.4505 15.5771  -2
   1 -11   4 42.4505 15.5771   1
   2 -11   5 41.0614 16.6067  -2
   2 -11   4 41.0614 16.6067   1
   3 -11   5 432.844 88.6827  -2
   3 -11   4 432.844 88.6827   1
   4 -11   4 -13.527 22.0535  -2
   4 -11   4 -13.527 22.0535   1
   5 -11   4 56.2140 11.4426  -2
   5 -11   4 56.2140 11.4426   1
   6 -11   4 -11.626 14.7101  -2
   6 -11   4 -11.626 14.7101   1
  -2 -10   5 11.4995 15.0420  -2
  -2 -10   4 11.4995 15.0420   1
  -1 -10   5 123.766 11.6373  -2
  -1 -10   4 123.766 11.6373   1
   0 -10   5 -30.593 17.6075  -2
   0 -10   4 -30.593 17.6075   1
   1 -10   5 17.2616 13.3518  -2
   1 -10   4 17.2616 13.3518   1
   2 -10   5 34.2913 15.1276  -2
   2 -10   4 34.2913 15.1276   1
   3 -10   5 314.375 86.2629  -2
   3 -10   4 314.375 86.2629   1
   3 -10   4 186.872 62.1442  -2
   3 -10   4 186.872 62.1442   1
   4 -10   4 47.3500 10.2647  -2
   4 -10   4 47.3500 10.2647   1
   5 -10   4 -3.0970 10.8322  -2
   5 -10   4 -3.0970 10.8322   1
   6 -10   4 3.67588 9.68430  -2
   6 -10   4 3.67588 9.68430   1
   7 -10   4 29.0675 15.7101  -2
   7 -10   4 29.0675 15.7101   1
  -4  -9   4 68.3054 8.96589   1
  -3  -9   5 170.259 32.9962  -2
  -3  -9   4 170.259 32.9962   1
  -2  -9   5 109.528 14.0852  -2
  -2  -9   4 109.528 14.0852   1
  -1  -9   5 168.194 10.6591  -2
  -1  -9   4 168.194 10.6591   1
   0  -9   5 111.256 9.58764  -2
   0  -9   4 111.256 9.58764   1
   1  -9   5 38.9387 6.71775  -2
   1  -9   4 38.9387 6.71775   1
   2  -9   5 75.3312 8.96769  -2
   2  -9   4 75.3312 8.96769   1
   3  -9   4 189.509 15.2379  -2
   3  -9   4 189.509 15.2379   1
   4  -9   4 44.8884 7.46772  -2
   4  -9   4 44.8884 7.46772   1
   5  -9   4 274.450 12.9294  -2
   5  -9   4 274.450 12.9294   1
   6  -9   4 -6.8410 10.3874  -2
   6  -9   4 -6.8410 10.3874   1
   7  -9   4 120.509 19.4461  -2
   7  -9   4 120.509 19.4461   1
   8  -9   4 56.2525 23.8739  -2
   8  -9   4 56.2525 23.8739   1
  -5  -8   6 283.439 44.2202  -2
  -5  -8   4 283.439 44.2202   1
  -4  -8   5 25.3801 22.9313  -2
  -4  -8   4 25.3801 22.9313   1
  -3  -8   5 242.969 22.0543  -2
  -3  -8   4 242.969 22.0543   1
  -2  -8   5 169.594 11.2704  -2
  -2  -8   4 169.594 11.2704   1
  -1  -8   5 19.1508 6.98110  -2
  -1  -8   4 19.1508 6.98110   1
   0  -8   5 3.39663 8.27128  -2
   0  -8   4 3.39663 8.27128   1
   1  -8   5 207.640 13.3180  -2
   1  -8   4 207.640 13.3180   1
   2  -8   5 269.185 21.7781  -2
   2  -8   4 269.185 21.7781   1
   3  -8   4 18.9889 6.18490  -2
   3  -8   4 18.9889 6.18490   1
   4  -8   4 47.5610 8.26009  -2
   4  -8   4 47.5610 8.26009   1
   5  -8   4 32.4883 8.86462  -2
   5  -8   4 32.4883 8.86462   1
   6  -8   4 66.5952 11.4259  -2
   6  -8   4 66.5952 11.4259   1
   7  -8   4 61.9300 14.9790  -2
   7  -8   4 61.9300 14.9790   1
   8  -8   4 168.067 21.0892  -2
   8  -8   4 168.067 21.0892   1
   8  -8   3 50.9274 62.7959  -2
   8  -8   4 50.9274 62.7959   1
   8  -8   4 178.085 112.805  -2
   8  -8   3 178.085 112.805  -2
   8  -8   4 178.085 112.805   1
   9  -8   3 35.0644 35.0627  -2
   9  -8   4 35.0644 35.0627   1
  -6  -7   6 58.7803 29.7240  -2
  -6  -7   4 58.7803 29.7240   1
  -5  -7   5 275.462 35.7556  -2
  -5  -7   4 275.462 35.7556   1
  -4  -7   5 128.373 16.4779  -2
  -4  -7   4 128.373 16.4779   1
  -3  -7   5 9.13375 11.4235  -2
  -3  -7   4 9.13375 11.4235   1
  -2  -7   5 78.2109 11.4596  -2
  -2  -7   4 78.2109 11.4596   1
  -1  -7   5 29.8006 7.71509  -2
  -1  -7   4 29.8006 7.71509   1
   0  -7   5 121.934 9.73574  -2
   0  -7   4 121.934 9.73574   1
   1  -7   4 432.438 37.6737  -2
   1  -7   4 432.438 37.6737   1
   1  -7   5 429.480 18.8330  -2
   1  -7   4 429.480 18.8330   1
   2  -7   4 119.554 7.45287  -2
   2  -7   4 119.554 7.45287   1
   3  -7   4 61.9596 6.83198  -2
   3  -7   4 61.9596 6.83198   1
   4  -7   4 36.5483 7.42773  -2
   4  -7   4 36.5483 7.42773   1
   5  -7   4 5.42035 8.64051  -2
   5  -7   4 5.42035 8.64051   1
   6  -7   4 255.239 12.9795  -2
   6  -7   4 255.239 12.9795   1
   7  -7   4 260.030 17.3207  -2
   7  -7   4 260.030 17.3207   1
   8  -7   3 -51.775 65.4173  -2
   8  -7   4 -51.775 65.4173   1
   8  -7   4 8.05573 24.4117  -2
   8  -7   4 8.05573 24.4117   1
   9  -7   3 42.5716 22.7770  -2
   9  -7   4 42.5716 22.7770   1
  -7  -6   6 -19.613 29.5182  -2
  -7  -6   4 -19.613 29.5182   1
  -6  -6   6 95.2460 36.6685  -2
  -6  -6   4 95.2460 36.6685   1
  -5  -6   5 173.888 23.7291  -2
  -5  -6   4 173.888 23.7291   1
  -4  -6   5 198.568 16.1917  -2
  -4  -6   4 198.568 16.1917   1
  -3  -6   5 82.8673 11.2198  -2
  -3  -6   4 82.8673 11.2198   1
  -2  -6   5 50.3339 14.4683  -2
  -2  -6   4 50.3339 14.4683   1
  -1  -6   5 325.339 13.5993  -2
  -1  -6   4 325.339 13.5993   1
   0  -6   5 374.558 15.3816  -2
   0  -6   4 374.558 15.3816   1
   1  -6   4 96.9311 8.20901  -2
   1  -6   4 96.9311 8.20901   1
   2  -6   4 115.349 6.68872  -2
   2  -6   4 115.349 6.68872   1
   3  -6   4 644.592 13.6460  -2
   3  -6   4 644.592 13.6460   1
   4  -6   4 114.823 7.58258  -2
   4  -6   4 114.823 7.58258   1
   5  -6   4 18.2928 7.00998  -2
   5  -6   4 18.2928 7.00998   1
   6  -6   4 65.5986 11.1530  -2
   6  -6   4 65.5986 11.1530   1
   7  -6   4 383.306 18.2494  -2
   7  -6   4 383.306 18.2494   1
   7  -6   3 233.008 82.6460  -2
   7  -6   4 233.008 82.6460   1
   8  -6   3 23.0385 18.9282  -2
   8  -6   4 23.0385 18.9282   1
   9  -6   3 13.9771 14.4610  -2
   9  -6   4 13.9771 14.4610   1
  10  -6   3 -22.370 17.0798  -2
  10  -6   4 -22.370 17.0798   1
  -7  -5   6 -42.293 23.4099  -2
  -7  -5   4 -42.293 23.4099   1
  -7  -5   5 -17.494 58.9839  -2
  -7  -5   4 -17.494 58.9839   1
  -6  -5   5 202.005 21.3573  -2
  -6  -5   4 202.005 21.3573   1
  -5  -5   5 292.617 18.0763  -2
  -5  -5   4 292.617 18.0763   1
  -4  -5   5 204.592 12.8496  -2
  -4  -5   4 204.592 12.8496   1
  -3  -5   5 43.9816 8.36919  -2
  -3  -5   4 43.9816 8.36919   1
  -2  -5   5 190.440 8.69651  -2
  -2  -5   4 190.440 8.69651   1
  -1  -5   5 484.938 18.1948  -2
  -1  -5   4 484.938 18.1948   1
   0  -5   4 195.761 6.28504   1
   1  -5   4 428.740 11.5920  -2
   1  -5   4 428.740 11.5920   1
   2  -5   4 158.515 7.93880  -2
   2  -5   4 158.515 7.93880   1
   3  -5   4 923.565 13.1812  -2
   3  -5   4 923.565 13.1812   1
   4  -5   4 2184.68 29.5527  -2
   4  -5   4 2184.68 29.5527   1
   5  -5   4 96.8806 10.0915  -2
   5  -5   4 96.8806 10.0915   1
   6  -5   4 72.3539 11.8254  -2
   6  -5   4 72.3539 11.8254   1
   7  -5   3 0.96732 27.1331  -2
   7  -5   4 0.96732 27.1331   1
   8  -5   3 8.29125 9.77477  -2
   8  -5   4 8.29125 9.77477   1
   9  -5   3 831.795 25.6932  -2
   9  -5   4 831.795 25.6932   1
  10  -5   3 107.913 16.8513  -2
  10  -5   4 107.913 16.8513   1
  -8  -4   6 73.6085 36.2928  -2
  -8  -4   4 73.6085 36.2928   1
  -7  -4   4 21.6407 7.85170   1
  -6  -4   5 165.285 14.8963  -2
  -6  -4   4 165.285 14.8963   1
  -5  -4   5 117.279 13.1628  -2
  -5  -4   4 117.279 13.1628   1
  -4  -4   5 740.778 18.8225  -2
  -4  -4   4 740.778 18.8225   1
  -3  -4   5 15.0945 9.53500  -2
  -3  -4   4 15.0945 9.53500   1
  -2  -4   5 185.714 13.6625  -2
  -2  -4   4 185.714 13.6625   1
  -1  -4   5 884.918 67.6855  -2
  -1  -4   4 884.918 67.6855   1
   0  -4   4 55.3749 15.5697  -2
   0  -4   4 55.3749 15.5697   1
   1  -4   4 469.795 9.84613  -2
   1  -4   4 469.795 9.84613   1
   2  -4   4 38.1474 5.58776  -2
   2  -4   4 38.1474 5.58776   1
   3  -4   4 210.807 8.26832  -2
   3  -4   4 210.807 8.26832   1
   4  -4   4 366.406 10.8410  -2
   4  -4   4 366.406 10.8410   1
   5  -4   4 -9.7410 13.2298  -2
   5  -4   4 -9.7410 13.2298   1
   6  -4   3 205.874 37.3270  -2
   6  -4   4 205.874 37.3270   1
   6  -4   4 19.6914 23.3628  -2
   6  -4   4 19.6914 23.3628   1
   7  -4   3 129.448 20.1095  -2
   7  -4   4 129.448 20.1095   1
   8  -4   3 95.6142 14.2085  -2
   8  -4   4 95.6142 14.2085   1
   9  -4   3 65.3395 17.1029  -2
   9  -4   4 65.3395 17.1029   1
  10  -4   3 254.437 22.4362  -2
  10  -4   4 254.437 22.4362   1
  -9  -3   4 136.764 32.8015   1
  -8  -3   5 122.322 77.9545  -2
  -8  -3   4 122.322 77.9545   1
  -7  -3   5 536.011 25.1458  -2
  -7  -3   4 536.011 25.1458   1
  -6  -3   5 30.5098 10.6644  -2
  -6  -3   4 30.5098 10.6644   1
  -5  -3   5 434.527 16.0945  -2
  -5  -3   4 434.527 16.0945   1
  -4  -3   5 599.909 17.9590  -2
  -4  -3   4 599.909 17.9590   1
  -3  -3   5 757.860 23.6536  -2
  -3  -3   4 757.860 23.6536   1
  -2  -3   5 1615.72 61.0365  -2
  -2  -3   4 1615.72 61.0365   1
  -1  -3   4 8.82644 28.8275  -2
  -1  -3   4 8.82644 28.8275   1
   0  -3   4 331.079 11.3258  -2
   0  -3   4 331.079 11.3258   1
   1  -3   4 47.0934 6.15850  -2
   1  -3   4 47.0934 6.15850   1
   2  -3   4 1747.74 23.3609  -2
   2  -3   4 1747.74 23.3609   1
   3  -3   4 1171.18 23.5501  -2
   3  -3   4 1171.18 23.5501   1
   4  -3   4 55.0868 18.1105  -2
   4  -3   4 55.0868 18.1105   1
   5  -3   4 85.0556 33.6463  -2
   5  -3   4 85.0556 33.6463   1
   6  -3   3 569.570 28.0230  -2
   6  -3   4 569.570 28.0230   1
   7  -3   3 0.21438 12.6846  -2
   7  -3   4 0.21438 12.6846   1
   8  -3   3 171.770 14.9921  -2
   8  -3   4 171.770 14.9921   1
   9  -3   3 43.4801 20.4817  -2
   9  -3   4 43.4801 20.4817   1
  10  -3   3 44.9837 18.9860  -2
  10  -3   4 44.9837 18.9860   1
  -9  -2   5 473.996 106.706  -2
  -9  -2   4 473.996 106.706   1
  -9  -2   6 -121.70 97.7054  -2
  -9  -2   4 -121.70 97.7054   1
  -8  -2   5 22.7558 30.7447  -2
  -8  -2   4 22.7558 30.7447   1
  -7  -2   5 247.391 19.9960  -2
  -7  -2   4 247.391 19.9960   1
  -6  -2   5 100.548 13.7919  -2
  -6  -2   4 100.548 13.7919   1
  -5  -2   5 147.100 11.1096  -2
  -5  -2   4 147.100 11.1096   1
  -4  -2   5 170.271 13.8700  -2
  -4  -2   4 170.271 13.8700   1
  -3  -2   4 170.271 6.61096   1
  -2  -2   4 -5.5932 2.64908   1
  -1  -2   4 338.041 18.2663  -2
  -1  -2   4 338.041 18.2663   1
   0  -2   4 451.806 20.5329  -2
   0  -2   4 451.806 20.5329   1
   1  -2   4 1523.51 25.8806  -2
   1  -2   4 1523.51 25.8806   1
   2  -2   4 130.221 16.1632  -2
   2  -2   4 130.221 16.1632   1
   3  -2   4 514.454 11.4473   1
   4  -2   4 67.0914 5.08313   1
   5  -2   3 192.110 28.6112  -2
   5  -2   4 192.110 28.6112   1
   6  -2   3 311.887 18.6390  -2
   6  -2   4 311.887 18.6390   1
   7  -2   3 326.040 16.7839  -2
   7  -2   4 326.040 16.7839   1
   8  -2   3 87.7581 15.2157  -2
   8  -2   4 87.7581 15.2157   1
   9  -2   3 33.9390 16.9649  -2
   9  -2   4 33.9390 16.9649   1
  10  -2   3 -18.526 24.8265  -2
  10  -2   4 -18.526 24.8265   1
  -9  -1   5 130.604 46.7259  -2
  -9  -1   4 130.604 46.7259   1
  -8  -1   5 145.644 34.2132  -2
  -8  -1   4 145.644 34.2132   1
  -7  -1   5 175.627 15.6140  -2
  -7  -1   4 175.627 15.6140   1
  -6  -1   5 23.1768 13.1407  -2
  -6  -1   4 23.1768 13.1407   1
  -5  -1   5 193.115 14.0407  -2
  -5  -1   4 193.115 14.0407   1
  -4  -1   5 2584.76 97.4209  -2
  -4  -1   4 2584.76 97.4209   1
  -3  -1   4 93.2559 6.01926   1
  -2  -1   4 5.89481 2.89908   1
  -1  -1   4 71.1267 17.0415  -2
  -1  -1   4 71.1267 17.0415   1
   0  -1   4 1115.42 54.6180  -2
   0  -1   4 1115.42 54.6180   1
   1  -1   4 9999.99 83.3295   1
   2  -1   4 15.9193 2.69896   1
   3  -1   4 76.2074 5.02291   1
   4  -1   4 171.943 7.94880   1
   5  -1   3 65.2110 13.9261  -2
   5  -1   4 65.2110 13.9261   1
   6  -1   3 -7.0647 11.1704  -2
   6  -1   4 -7.0647 11.1704   1
   7  -1   3 324.758 15.4967  -2
   7  -1   4 324.758 15.4967   1
   8  -1   3 120.178 18.7068  -2
   8  -1   4 120.178 18.7068   1
   9  -1   3 78.4124 19.9613  -2
   9  -1   4 78.4124 19.9613   1
  10  -1   3 217.033 38.4424  -2
  10  -1   4 217.033 38.4424   1
 -10   0   6 -140.27 102.865  -2
 -10   0   4 -140.27 102.865   1
  -9   0   5 280.249 82.3395  -2
  -9   0   4 280.249 82.3395   1
  -8   0   5 45.0665 21.6422  -2
  -8   0   4 45.0665 21.6422   1
  -7   0   5 44.4545 14.5265  -2
  -7   0   4 44.4545 14.5265   1
  -6   0   5 68.4141 12.8900  -2
  -6   0   4 68.4141 12.8900   1
  -5   0   5 229.294 16.9772  -2
  -5   0   4 229.294 16.9772   1
  -4   0   4 277.765 8.85241   1
  -3   0   4 887.308 13.5062   1
  -2   0   4 248.657 6.76140   1
  -1   0   4 8.54379 2.79864   1
   0   0   4 2369.78 22.9572   1
   1   0   4 1267.68 14.1315   1
   2   0   4 116.989 4.79638   1
   3   0   4 71.5956 5.31890   1
   4   0   3 183.582 28.4807  -2
   4   0   4 183.582 28.4807   1
   5   0   3 1760.59 32.7522  -2
   5   0   4 1760.59 32.7522   1
   6   0   3 75.3476 12.8953  -2
   6   0   4 75.3476 12.8953   1
   7   0   3 -10.234 12.3674  -2
   7   0   4 -10.234 12.3674   1
   8   0   3 77.3474 20.7094  -2
   8   0   4 77.3474 20.7094   1
   9   0   3 48.5558 26.0909  -2
   9   0   4 48.5558 26.0909   1
 -10   1   5 -7.3829 66.6049  -2
 -10   1   4 -7.3829 66.6049   1
  -9   1   5 27.1993 36.3728  -2
  -9   1   4 27.1993 36.3728   1
  -8   1   5 -20.199 21.2565  -2
  -8   1   4 -20.199 21.2565   1
  -7   1   5 81.5894 21.4980  -2
  -7   1   4 81.5894 21.4980   1
  -6   1   5 142.235 38.3343  -2
  -6   1   4 142.235 38.3343   1
  -5   1   4 128.598 7.41211   1
  -4   1   4 26.0923 4.19029   1
  -3   1   4 365.396 24.1850  -2
  -3   1   4 365.396 24.1850   1
  -2   1   4 61.7715 24.6447  -2
  -2   1   4 61.7715 24.6447   1
  -1   1   4 79.2586 3.31504   1
   0   1   4 624.741 8.39535   1
   1   1   4 542.948 7.43046   1
   2   1   4 21.5961 3.25582   1
   3   1   4 19.1823 4.01825   1
   4   1   3 34.2311 12.6232  -2
   4   1   4 34.2311 12.6232   1
   5   1   3 455.616 12.7013  -2
   5   1   4 455.616 12.7013   1
   6   1   3 121.630 13.9309  -2
   6   1   4 121.630 13.9309   1
   7   1   3 23.2861 16.2854  -2
   7   1   4 23.2861 16.2854   1
   8   1   3 35.4152 23.2579  -2
   8   1   4 35.4152 23.2579   1
   9   1   3 5.02662 53.9633  -2
   9   1   4 5.02662 53.9633   1
 -10   2   5 214.613 64.2435  -2
 -10   2   4 214.613 64.2435   1
  -9   2   4 6.23548 6.21061   1
  -8   2   5 739.804 40.9718  -2
  -8   2   4 739.804 40.9718   1
  -7   2   5 65.0295 29.3228  -2
  -7   2   4 65.0295 29.3228   1
  -6   2   4 17.5563 4.35116   1
  -5   2   4 18.2144 4.09687   1
  -4   2   4 338.772 9.88069   1
  -3   2   4 15.7269 3.39220   1
  -2   2   4 3.35177 15.5714  -2
  -2   2   4 3.35177 15.5714   1
  -1   2   4 0.31728 10.3215  -2
  -1   2   4 0.31728 10.3215   1
   0   2   4 170.263 23.0261  -2
   0   2   4 170.263 23.0261   1
   1   2   4 249.769 5.56878   1
   2   2   4 40.6316 3.41273   1
   3   2   4 10.0258 3.00207   1
   4   2   3 70.3764 10.2326  -2
   4   2   4 70.3764 10.2326   1
   5   2   3 43.8781 12.1596  -2
   5   2   4 43.8781 12.1596   1
   6   2   3 52.6903 15.1574  -2
   6   2   4 52.6903 15.1574   1
   7   2   3 100.484 27.5511  -2
   7   2   4 100.484 27.5511   1
   8   2   3 22.9647 46.2268  -2
   8   2   4 22.9647 46.2268   1
 -10   3   5 221.475 104.105  -2
 -10   3   4 221.475 104.105   1
  -9   3   5 89.8515 80.9355  -2
  -9   3   4 89.8515 80.9355   1
  -8   3   5 410.672 68.2240  -2
  -8   3   4 410.672 68.2240   1
  -7   3   4 15.8166 4.60031   1
  -6   3   4 8.05484 3.71892   1
  -5   3   4 86.2303 6.01354   1
  -4   3   4 6.27633 3.64129   1
  -3   3   4 587.206 53.7458  -2
  -3   3   4 587.206 53.7458   1
  -2   3   4 512.696 32.0777  -2
  -2   3   4 512.696 32.0777   1
  -1   3   4 95.3031 3.68892   1
   0   3   4 120.895 4.05171   1
   1   3   4 10.4968 2.62844   1
   2   3   4 -2.6318 2.32653   1
   3   3   3 146.157 22.9900  -2
   3   3   4 146.157 22.9900   1
   4   3   3 6.32984 13.0086  -2
   4   3   4 6.32984 13.0086   1
   5   3   3 37.7346 14.8241  -2
   5   3   4 37.7346 14.8241   1
   6   3   3 279.097 25.9216  -2
   6   3   4 279.097 25.9216   1
   7   3   3 73.8810 40.7326  -2
   7   3   4 73.8810 40.7326   1
   8   3   4 18.6226 6.04239   1
 -10   4   5 44.3276 47.0518  -2
 -10   4   4 44.3276 47.0518   1
  -9   4   5 1.74124 43.1504  -2
  -9   4   4 1.74124 43.1504   1
  -8   4   4 10.8581 4.91563   1
  -7   4   4 53.0540 5.32185   1
  -6   4   4 5.65412 2.59729   1
  -5   4   4 -1.2387 3.29604   1
  -4   4   4 192.916 6.04173   1
  -3   4   4 443.617 7.92090   1
  -2   4   4 5.70281 2.55429   1
  -1   4   4 45.4677 2.95244   1
   0   4   4 705.445 9.17333   1
   1   4   4 490.011 7.68806   1
   2   4   4 32.5897 3.07328   1
   3   4   3 424.796 25.8817  -2
   3   4   4 424.796 25.8817   1
   4   4   3 164.864 22.9884  -2
   4   4   4 164.864 22.9884   1
   5   4   3 655.383 36.2434  -2
   5   4   4 655.383 36.2434   1
   6   4   3 328.760 55.2349  -2
   6   4   4 328.760 55.2349   1
   7   4   4 3.13885 4.55159   1
 -10   5   4 3.55269 7.38533   1
  -9   5   4 7.55271 6.45989   1
  -8   5   4 267.961 11.0472   1
  -7   5   4 62.9594 5.91659   1
  -6   5   4 -5.1455 3.65119   1
  -5   5   4 -1.0235 2.42016   1
  -4   5   4 3.16291 2.60608   1
  -3   5   4 9.08578 2.56270   1
  -2   5   4 7.01985 2.01859   1
  -1   5   4 309.721 5.22975   1
   0   5   4 99.5964 3.77452   1
   1   5   4 497.026 8.48928   1
   2   5   3 61.6462 39.0137  -2
   2   5   4 61.6462 39.0137   1
   3   5   3 113.345 28.7782  -2
   3   5   4 113.345 28.7782   1
   4   5   3 31.0602 32.6699  -2
   4   5   4 31.0602 32.6699   1
   5   5   4 105.100 7.33503   1
   6   5   4 65.6206 6.44613   1
   7   5   4 90.6783 8.46331   1
 -10   6   4 9.15868 7.64010   1
  -9   6   4 7.37397 6.40431   1
  -8   6   4 19.4059 5.59003   1
  -7   6   4 38.8459 5.82974   1
  -6   6   4 9.93449 3.79397   1
  -5   6   4 4.18145 3.15884   1
  -4   6   4 415.165 8.71224   1
  -3   6   4 102.087 4.02035   1
  -2   6   4 103.802 4.59474   1
  -1   6   4 5.45073 2.36840   1
   0   6   4 31.1000 2.30554   1
   1   6   4 257.674 6.57527   1
   2   6   4 21.9659 3.48117   1
   3   6   4 48.8363 4.95836   1
   4   6   4 8.62919 4.44855   1
   5   6   4 37.8908 5.42224   1
   6   6   4 126.296 7.72260   1
  -9   7   4 55.0467 7.76280   1
  -8   7   4 7.62194 4.97567   1
  -7   7   4 -2.8340 4.68618   1
  -6   7   4 105.365 6.17611   1
  -5   7   4 405.967 9.78314   1
  -4   7   4 154.930 6.15994   1
  -3   7   4 9.66472 2.94637   1
  -2   7   4 6.19019 3.64719   1
  -1   7   4 1111.66 19.4511   1
   0   7   4 35.6406 3.43967   1
   1   7   4 67.4287 3.97259   1
   2   7   4 223.019 6.97647   1
   3   7   3 52.3273 56.0032  -2
   3   7   4 52.3273 56.0032   1
   4   7   4 7.25208 4.83347   1
   5   7   4 0.09216 5.51571   1
  -9   8   4 3.28864 6.35217   1
  -8   8   4 16.8870 5.89384   1
  -7   8   4 297.265 10.5827   1
  -6   8   4 3.32460 3.92449   1
  -5   8   4 219.426 7.36485   1
  -4   8   4 -0.0216 3.47541   1
  -3   8   4 379.981 12.3508   1
  -2   8   4 149.033 8.14370   1
  -1   8   4 42.2798 4.87890   1
   0   8   4 96.0040 5.77255   1
   1   8   4 95.5359 5.96366   1
   2   8   4 14.3994 3.28372   1
   3   8   4 -2.6322 3.76867   1
   4   8   4 15.9995 6.43314   1
  -8   9   4 54.6899 6.86060   1
  -7   9   4 48.8781 5.51212   1
  -6   9   4 10.9633 3.66065   1
  -5   9   4 25.2061 4.51224   1
  -4   9   4 184.887 11.6521   1
  -3   9   4 56.7330 6.14655   1
  -2   9   4 69.1231 5.81565   1
  -1   9   4 66.8691 6.29563   1
   0   9   4 13.5920 5.81988   1
   1   9   4 98.8748 5.62157   1
   2   9   4 38.3988 4.81207   1
  -7  10   4 65.3245 5.29812   1
  -6  10   4 19.9878 4.55372   1
  -5  10   4 32.2351 7.22866   1
  -4  10   4 -6.4708 5.81105   1
  -3  10   4 89.2264 7.21270   1
  -2  10   4 11.7542 4.50532   1
  -1  10   4 -4.1680 4.90301   1
   0  10   4 8.97679 6.49461   1
   1  10   4 32.9307 7.10729   1
  -4  11   4 131.865 9.84263   1
  -3  11   4 9.21527 6.52067   1
   0 -11   6 22.5806 21.1936  -2
   0 -11   5 22.5806 21.1936   1
   1 -11   6 46.1315 16.1532  -2
   1 -11   5 46.1315 16.1532   1
   2 -11   6 63.5892 26.2597  -2
   2 -11   5 63.5892 26.2597   1
   3 -11   6 -6.7551 17.7255  -2
   3 -11   5 -6.7551 17.7255   1
   4 -11   5 -40.463 18.4850  -2
   4 -11   5 -40.463 18.4850   1
   5 -11   5 3.25505 12.4863  -2
   5 -11   5 3.25505 12.4863   1
   6 -11   5 -1.3622 12.0095  -2
   6 -11   5 -1.3622 12.0095   1
  -2 -10   6 42.0792 15.5873  -2
  -2 -10   5 42.0792 15.5873   1
  -1 -10   6 102.056 12.5427  -2
  -1 -10   5 102.056 12.5427   1
   0 -10   6 19.6507 8.30571  -2
   0 -10   5 19.6507 8.30571   1
   1 -10   6 45.4355 6.78908  -2
   1 -10   5 45.4355 6.78908   1
   2 -10   6 -28.156 7.28465  -2
   2 -10   5 -28.156 7.28465   1
   3 -10   6 37.7401 10.4020  -2
   3 -10   5 37.7401 10.4020   1
   3 -10   5 -84.293 54.0949  -2
   3 -10   5 -84.293 54.0949   1
   4 -10   5 8.81032 10.7122  -2
   4 -10   5 8.81032 10.7122   1
   5 -10   5 55.2588 11.7691  -2
   5 -10   5 55.2588 11.7691   1
   6 -10   5 141.708 13.0497  -2
   6 -10   5 141.708 13.0497   1
   7 -10   5 32.2376 14.8312  -2
   7 -10   5 32.2376 14.8312   1
  -4  -9   5 50.9994 11.1404   1
  -3  -9   6 184.091 31.6903  -2
  -3  -9   5 184.091 31.6903   1
  -2  -9   6 57.4597 17.7039  -2
  -2  -9   5 57.4597 17.7039   1
  -1  -9   6 75.5771 8.14230  -2
  -1  -9   5 75.5771 8.14230   1
   0  -9   6 449.985 16.5969  -2
   0  -9   5 449.985 16.5969   1
   1  -9   6 60.0098 9.56549  -2
   1  -9   5 60.0098 9.56549   1
   2  -9   6 248.934 13.3631  -2
   2  -9   5 248.934 13.3631   1
   3  -9   5 378.364 21.6202  -2
   3  -9   5 378.364 21.6202   1
   3  -9   6 426.947 41.4575  -2
   3  -9   5 426.947 41.4575   1
   4  -9   5 1056.12 22.7809  -2
   4  -9   5 1056.12 22.7809   1
   5  -9   5 54.8338 9.68818  -2
   5  -9   5 54.8338 9.68818   1
   6  -9   5 21.4136 10.8055  -2
   6  -9   5 21.4136 10.8055   1
   7  -9   5 17.5190 15.0519  -2
   7  -9   5 17.5190 15.0519   1
   8  -9   5 129.827 22.8326  -2
   8  -9   5 129.827 22.8326   1
  -5  -8   7 202.961 33.6179  -2
  -5  -8   5 202.961 33.6179   1
  -4  -8   6 40.8971 19.9205  -2
  -4  -8   5 40.8971 19.9205   1
  -3  -8   6 243.845 17.2977  -2
  -3  -8   5 243.845 17.2977   1
  -2  -8   6 148.990 13.3586  -2
  -2  -8   5 148.990 13.3586   1
  -1  -8   6 3.79201 7.45410  -2
  -1  -8   5 3.79201 7.45410   1
   0  -8   6 84.7917 9.58671  -2
   0  -8   5 84.7917 9.58671   1
   1  -8   6 147.250 8.64855  -2
   1  -8   5 147.250 8.64855   1
   2  -8   6 247.174 22.9266  -2
   2  -8   5 247.174 22.9266   1
   3  -8   5 269.189 11.5806  -2
   3  -8   5 269.189 11.5806   1
   4  -8   5 517.164 15.1295  -2
   4  -8   5 517.164 15.1295   1
   5  -8   5 172.755 11.4293  -2
   5  -8   5 172.755 11.4293   1
   6  -8   5 5.02343 11.2837  -2
   6  -8   5 5.02343 11.2837   1
   7  -8   5 119.738 17.4057  -2
   7  -8   5 119.738 17.4057   1
   8  -8   5 40.0772 17.2972  -2
   8  -8   5 40.0772 17.2972   1
   9  -8   5 233.904 49.9014  -2
   9  -8   5 233.904 49.9014   1
   9  -8   4 30.8900 35.3742  -2
   9  -8   5 30.8900 35.3742   1
  -6  -7   7 24.1991 29.3547  -2
  -6  -7   5 24.1991 29.3547   1
  -5  -7   6 360.802 41.9812  -2
  -5  -7   5 360.802 41.9812   1
  -4  -7   6 87.8618 16.2176  -2
  -4  -7   5 87.8618 16.2176   1
  -3  -7   6 24.3134 12.6389  -2
  -3  -7   5 24.3134 12.6389   1
  -2  -7   6 43.4255 9.95171  -2
  -2  -7   5 43.4255 9.95171   1
  -1  -7   6 33.4939 11.6208  -2
  -1  -7   5 33.4939 11.6208   1
   0  -7   6 200.407 9.97953  -2
   0  -7   5 200.407 9.97953   1
   1  -7   6 354.449 15.4046  -2
   1  -7   5 354.449 15.4046   1
   2  -7   5 193.366 10.1717  -2
   2  -7   5 193.366 10.1717   1
   3  -7   5 264.982 10.1627  -2
   3  -7   5 264.982 10.1627   1
   4  -7   5 1123.75 21.7213  -2
   4  -7   5 1123.75 21.7213   1
   5  -7   5 0.67276 7.21244  -2
   5  -7   5 0.67276 7.21244   1
   6  -7   5 -0.4689 8.65827  -2
   6  -7   5 -0.4689 8.65827   1
   7  -7   5 10.0967 14.2059  -2
   7  -7   5 10.0967 14.2059   1
   8  -7   5 13.3959 30.3230  -2
   8  -7   5 13.3959 30.3230   1
   8  -7   4 109.148 78.8322  -2
   8  -7   5 109.148 78.8322   1
   9  -7   4 14.6532 19.4426  -2
   9  -7   5 14.6532 19.4426   1
  -7  -6   5 62.3113 9.86831   1
  -6  -6   5 -3.1313 6.38160   1
  -5  -6   6 -18.098 22.6126  -2
  -5  -6   5 -18.098 22.6126   1
  -4  -6   6 185.303 15.4551  -2
  -4  -6   5 185.303 15.4551   1
  -3  -6   6 139.989 11.2148  -2
  -3  -6   5 139.989 11.2148   1
  -2  -6   6 409.336 17.6111  -2
  -2  -6   5 409.336 17.6111   1
  -1  -6   6 216.187 12.0146  -2
  -1  -6   5 216.187 12.0146   1
   0  -6   6 381.724 14.5403  -2
   0  -6   5 381.724 14.5403   1
   1  -6   5 1283.52 24.6200  -2
   1  -6   5 1283.52 24.6200   1
   2  -6   5 383.407 10.0544  -2
   2  -6   5 383.407 10.0544   1
   3  -6   5 16.9588 6.53852  -2
   3  -6   5 16.9588 6.53852   1
   4  -6   5 233.507 7.71198  -2
   4  -6   5 233.507 7.71198   1
   5  -6   5 189.409 10.1461  -2
   5  -6   5 189.409 10.1461   1
   6  -6   5 371.515 15.6155  -2
   6  -6   5 371.515 15.6155   1
   7  -6   5 304.806 25.4116  -2
   7  -6   5 304.806 25.4116   1
   7  -6   4 441.426 94.0856  -2
   7  -6   5 441.426 94.0856   1
   8  -6   4 167.757 16.8212  -2
   8  -6   5 167.757 16.8212   1
   9  -6   4 247.126 18.4610  -2
   9  -6   5 247.126 18.4610   1
  10  -6   4 37.3973 18.5199  -2
  10  -6   5 37.3973 18.5199   1
  -7  -5   7 1.40971 55.4375  -2
  -7  -5   5 1.40971 55.4375   1
  -6  -5   6 89.5403 30.1108  -2
  -6  -5   5 89.5403 30.1108   1
  -5  -5   6 204.370 16.5828  -2
  -5  -5   5 204.370 16.5828   1
  -4  -5   6 39.7544 11.4568  -2
  -4  -5   5 39.7544 11.4568   1
  -3  -5   6 323.138 12.9273  -2
  -3  -5   5 323.138 12.9273   1
  -2  -5   6 215.632 12.2784  -2
  -2  -5   5 215.632 12.2784   1
  -1  -5   6 556.212 18.1597  -2
  -1  -5   5 556.212 18.1597   1
   0  -5   5 9.19041 2.61516   1
   1  -5   5 123.098 9.46657  -2
   1  -5   5 123.098 9.46657   1
   2  -5   5 309.888 9.26404  -2
   2  -5   5 309.888 9.26404   1
   3  -5   5 -9.0152 5.12120  -2
   3  -5   5 -9.0152 5.12120   1
   4  -5   5 3.26225 5.77210  -2
   4  -5   5 3.26225 5.77210   1
   5  -5   5 139.591 9.76328  -2
   5  -5   5 139.591 9.76328   1
   6  -5   5 95.3397 11.3726  -2
   6  -5   5 95.3397 11.3726   1
   7  -5   4 28.5819 27.3519  -2
   7  -5   5 28.5819 27.3519   1
   8  -5   4 189.735 18.6399  -2
   8  -5   5 189.735 18.6399   1
   9  -5   4 823.363 30.5592  -2
   9  -5   5 823.363 30.5592   1
  10  -5   4 63.3454 17.6591  -2
  10  -5   5 63.3454 17.6591   1
  -8  -4   7 -18.859 55.8182  -2
  -8  -4   5 -18.859 55.8182   1
  -7  -4   6 125.561 59.4904  -2
  -7  -4   5 125.561 59.4904   1
  -6  -4   6 152.938 18.1206  -2
  -6  -4   5 152.938 18.1206   1
  -5  -4   6 58.2409 12.6864  -2
  -5  -4   5 58.2409 12.6864   1
  -4  -4   6 731.029 18.9084  -2
  -4  -4   5 731.029 18.9084   1
  -3  -4   6 139.482 11.1590  -2
  -3  -4   5 139.482 11.1590   1
  -2  -4   6 231.953 10.9283  -2
  -2  -4   5 231.953 10.9283   1
  -1  -4   5 538.729 9.38656   1
   0  -4   5 6156.33 143.696  -2
   0  -4   5 6156.33 143.696   1
   1  -4   5 805.126 16.4121  -2
   1  -4   5 805.126 16.4121   1
   2  -4   5 840.542 15.0251  -2
   2  -4   5 840.542 15.0251   1
   3  -4   5 17.1471 5.82673  -2
   3  -4   5 17.1471 5.82673   1
   4  -4   5 408.561 14.2597  -2
   4  -4   5 408.561 14.2597   1
   5  -4   5 49.8816 15.2738  -2
   5  -4   5 49.8816 15.2738   1
   6  -4   4 33.0902 39.7366  -2
   6  -4   5 33.0902 39.7366   1
   6  -4   5 13.6390 33.9970  -2
   6  -4   5 13.6390 33.9970   1
   7  -4   4 84.4753 16.3969  -2
   7  -4   5 84.4753 16.3969   1
   8  -4   4 10.1682 17.7212  -2
   8  -4   5 10.1682 17.7212   1
   9  -4   4 4.35199 18.8125  -2
   9  -4   5 4.35199 18.8125   1
  10  -4   4 220.155 20.8494  -2
  10  -4   5 220.155 20.8494   1
  -8  -3   5 11.8423 4.71213   1
  -7  -3   6 268.967 39.3162  -2
  -7  -3   5 268.967 39.3162   1
  -6  -3   6 9.51914 15.9491  -2
  -6  -3   5 9.51914 15.9491   1
  -5  -3   6 260.647 16.4702  -2
  -5  -3   5 260.647 16.4702   1
  -4  -3   6 998.702 24.1733  -2
  -4  -3   5 998.702 24.1733   1
  -3  -3   6 3.35857 9.42986  -2
  -3  -3   5 3.35857 9.42986   1
  -2  -3   5 1424.61 18.0874   1
  -1  -3   5 3774.10 162.596  -2
  -1  -3   5 3774.10 162.596   1
   0  -3   5 3044.92 59.8226  -2
   0  -3   5 3044.92 59.8226   1
   1  -3   5 21.1028 9.19944  -2
   1  -3   5 21.1028 9.19944   1
   2  -3   5 140.382 8.35452  -2
   2  -3   5 140.382 8.35452   1
   3  -3   5 362.489 15.0799  -2
   3  -3   5 362.489 15.0799   1
   4  -3   5 412.692 36.3265  -2
   4  -3   5 412.692 36.3265   1
   5  -3   5 50.3000 25.6193  -2
   5  -3   5 50.3000 25.6193   1
   6  -3   4 98.7088 15.6028  -2
   6  -3   5 98.7088 15.6028   1
   7  -3   4 25.5712 14.2898  -2
   7  -3   5 25.5712 14.2898   1
   8  -3   4 -0.7216 13.6718  -2
   8  -3   5 -0.7216 13.6718   1
   9  -3   4 48.8066 17.4962  -2
   9  -3   5 48.8066 17.4962   1
  10  -3   4 31.6937 20.5295  -2
  10  -3   5 31.6937 20.5295   1
  -9  -2   6 85.4755 97.7395  -2
  -9  -2   5 85.4755 97.7395   1
  -9  -2   7 -86.630 105.021  -2
  -9  -2   5 -86.630 105.021   1
  -8  -2   6 83.6023 37.9576  -2
  -8  -2   5 83.6023 37.9576   1
  -7  -2   6 303.528 27.2450  -2
  -7  -2   5 303.528 27.2450   1
  -6  -2   6 79.4057 13.2266  -2
  -6  -2   5 79.4057 13.2266   1
  -5  -2   6 45.3378 11.3000  -2
  -5  -2   5 45.3378 11.3000   1
  -4  -2   6 48.6238 13.3323  -2
  -4  -2   5 48.6238 13.3323   1
  -3  -2   5 52.6363 5.61429   1
  -2  -2   5 1501.66 18.5948   1
  -1  -2   5 -7.9403 15.9540  -2
  -1  -2   5 -7.9403 15.9540   1
   0  -2   5 1260.55 16.8110   1
   1  -2   5 39.3820 8.77238  -2
   1  -2   5 39.3820 8.77238   1
   2  -2   5 36.1760 18.1757  -2
   2  -2   5 36.1760 18.1757   1
   3  -2   5 763.476 14.6493   1
   4  -2   5 6.37624 3.42627   1
   5  -2   4 -25.525 37.1694  -2
   5  -2   5 -25.525 37.1694   1
   6  -2   4 246.468 17.4593  -2
   6  -2   5 246.468 17.4593   1
   7  -2   4 401.572 17.5501  -2
   7  -2   5 401.572 17.5501   1
   8  -2   4 33.1062 17.0492  -2
   8  -2   5 33.1062 17.0492   1
   9  -2   4 27.6456 15.3805  -2
   9  -2   5 27.6456 15.3805   1
  10  -2   4 97.3492 27.3661  -2
  10  -2   5 97.3492 27.3661   1
  -9  -1   6 101.155 85.5459  -2
  -9  -1   5 101.155 85.5459   1
  -8  -1   6 -28.451 33.1799  -2
  -8  -1   5 -28.451 33.1799   1
  -7  -1   6 295.903 20.5149  -2
  -7  -1   5 295.903 20.5149   1
  -6  -1   6 197.227 17.2606  -2
  -6  -1   5 197.227 17.2606   1
  -5  -1   6 225.524 16.8091  -2
  -5  -1   5 225.524 16.8091   1
  -4  -1   6 1720.52 102.036  -2
  -4  -1   5 1720.52 102.036   1
  -3  -1   5 62.2003 5.61649   1
  -2  -1   5 1277.83 17.2021   1
  -1  -1   5 7753.71 295.435  -2
  -1  -1   5 7753.71 295.435   1
   0  -1   5 722.474 32.3764  -2
   0  -1   5 722.474 32.3764   1
   1  -1   5 1416.33 16.3339   1
   2  -1   5 38.8353 3.68342   1
   3  -1   5 935.752 13.2373   1
   4  -1   5 127.352 7.02601   1
   5  -1   4 168.831 16.5633  -2
   5  -1   5 168.831 16.5633   1
   6  -1   4 124.148 15.2972  -2
   6  -1   5 124.148 15.2972   1
   7  -1   4 286.156 16.9346  -2
   7  -1   5 286.156 16.9346   1
   8  -1   4 11.5943 14.4967  -2
   8  -1   5 11.5943 14.4967   1
   9  -1   4 3.47771 21.3264  -2
   9  -1   5 3.47771 21.3264   1
 -10   0   5 3.66744 8.31726   1
  -9   0   5 52.7395 9.11367   1
  -8   0   6 48.2571 40.4382  -2
  -8   0   5 48.2571 40.4382   1
  -7   0   6 50.4644 24.1632  -2
  -7   0   5 50.4644 24.1632   1
  -6   0   6 9.12902 19.0165  -2
  -6   0   5 9.12902 19.0165   1
  -5   0   6 208.957 62.0898  -2
  -5   0   5 208.957 62.0898   1
  -4   0   5 35.2613 5.86151   1
  -3   0   5 925.424 15.3979   1
  -2   0   5 6.70741 2.59503   1
  -1   0   5 351.781 7.17648   1
   0   0   5 74.2192 3.79830   1
   1   0   5 263.007 5.75651   1
   2   0   5 1174.97 14.8770   1
   3   0   5 211.602 6.55838   1
   4   0   5 432.765 10.7684   1
   5   0   4 1512.82 33.9259  -2
   5   0   5 1512.82 33.9259   1
   6   0   4 38.8322 12.4957  -2
   6   0   5 38.8322 12.4957   1
   7   0   4 5.29685 12.5459  -2
   7   0   5 5.29685 12.5459   1
   8   0   4 99.8129 24.9611  -2
   8   0   5 99.8129 24.9611   1
   9   0   4 173.687 38.6968  -2
   9   0   5 173.687 38.6968   1
 -10   1   5 32.1413 9.61553   1
  -9   1   5 4.98227 6.50954   1
  -8   1   5 19.5875 6.79273   1
  -7   1   6 51.9305 32.5185  -2
  -7   1   5 51.9305 32.5185   1
  -6   1   5 177.049 9.69358   1
  -5   1   5 5.24669 3.64897   1
  -4   1   5 638.787 13.5649   1
  -3   1   5 20.9749 3.79374   1
  -2   1   5 365.612 39.1584  -2
  -2   1   5 365.612 39.1584   1
  -1   1   5 299.776 5.94543   1
   0   1   5 63.7434 3.20618   1
   1   1   5 369.845 7.06716   1
   2   1   5 235.903 6.86892   1
   3   1   5 32.9844 4.50145   1
   4   1   4 16.0983 20.3089  -2
   4   1   5 16.0983 20.3089   1
   5   1   4 486.563 18.6119  -2
   5   1   5 486.563 18.6119   1
   6   1   4 422.076 18.3016  -2
   6   1   5 422.076 18.3016   1
   7   1   4 105.513 20.8082  -2
   7   1   5 105.513 20.8082   1
   8   1   4 7.90489 50.7581  -2
   8   1   5 7.90489 50.7581   1
   9   1   4 14.5849 52.9089  -2
   9   1   5 14.5849 52.9089   1
 -10   2   5 3.11713 7.07342   1
  -9   2   5 31.9077 8.32276   1
  -8   2   5 285.586 12.4153   1
  -7   2   5 15.5173 5.41297   1
  -6   2   5 82.9803 6.97613   1
  -5   2   5 266.628 9.54195   1
  -4   2   5 -3.5559 3.51424   1
  -3   2   5 165.750 7.10814   1
  -2   2   5 120.741 4.67218   1
  -1   2   5 49.6097 3.12126   1
   0   2   5 40.2537 2.74064   1
   1   2   5 20.3570 3.14052   1
   2   2   5 373.436 8.02505   1
   3   2   5 178.588 6.23290   1
   4   2   4 29.2668 19.7470  -2
   4   2   5 29.2668 19.7470   1
   5   2   4 359.898 23.9729  -2
   5   2   5 359.898 23.9729   1
   6   2   4 230.756 18.0104  -2
   6   2   5 230.756 18.0104   1
   7   2   4 82.5106 39.4101  -2
   7   2   5 82.5106 39.4101   1
   8   2   5 7.56875 5.62711   1
 -10   3   6 140.411 66.3631  -2
 -10   3   5 140.411 66.3631   1
  -9   3   5 7.79341 7.07074   1
  -8   3   5 441.369 14.8120   1
  -7   3   5 1249.43 21.1006   1
  -6   3   5 122.887 7.41456   1
  -5   3   5 48.9507 5.12265   1
  -4   3   5 223.100 7.67364   1
  -3   3   5 382.472 8.48864   1
  -2   3   5 744.272 9.85701   1
  -1   3   5 1396.09 14.0434   1
   0   3   5 727.348 8.97235   1
   1   3   5 -1.5047 2.60907   1
   2   3   5 470.008 8.76773   1
   3   3   5 112.541 5.24138   1
   4   3   4 8.11211 21.9483  -2
   4   3   5 8.11211 21.9483   1
   5   3   4 914.474 49.0886  -2
   5   3   5 914.474 49.0886   1
   6   3   5 193.274 9.02679   1
   7   3   5 20.0650 5.23394   1
   8   3   5 -2.8586 0.90434   1
 -10   4   6 0.36913 48.6006  -2
 -10   4   5 0.36913 48.6006   1
  -9   4   5 -1.9022 6.81110   1
  -8   4   5 930.902 19.5195   1
  -7   4   5 32.8837 5.75195   1
  -6   4   5 87.4091 6.78610   1
  -5   4   5 11.1673 3.85606   1
  -4   4   5 4.18804 2.92916   1
  -3   4   5 1000.29 12.2789   1
  -2   4   5 206.618 5.19175   1
  -1   4   5 222.465 5.53459   1
   0   4   5 71.8540 3.84303   1
   1   4   5 257.968 6.31873   1
   2   4   5 24.2912 3.37707   1
   3   4   5 362.542 8.70569   1
   4   4   5 391.346 10.5176   1
   5   4   5 34.5850 5.00791   1
   6   4   5 336.668 11.1873   1
   7   4   5 8.85733 5.95964   1
 -10   5   5 -9.4879 8.05195   1
  -9   5   5 4.51973 7.16718   1
  -8   5   5 326.096 12.5403   1
  -7   5   5 -1.8890 4.20246   1
  -6   5   5 90.7664 6.24552   1
  -5   5   5 31.2426 3.85861   1
  -4   5   5 33.3662 3.52019   1
  -3   5   5 518.855 8.73209   1
  -2   5   5 792.705 10.3968   1
  -1   5   5 40.4294 2.84107   1
   0   5   5 274.294 5.93289   1
   1   5   5 47.5209 2.99730   1
   2   5   5 7.59935 3.34989   1
   3   5   5 133.955 6.90085   1
   4   5   5 280.253 9.13090   1
   5   5   5 66.8917 6.60962   1
   6   5   5 62.4377 6.26214   1
   7   5   5 80.4397 22.7317   1
 -10   6   5 21.0325 8.20633   1
  -9   6   5 37.6225 7.26824   1
  -8   6   5 33.3535 5.66387   1
  -7   6   5 2.71177 4.38756   1
  -6   6   5 52.4829 4.67097   1
  -5   6   5 56.4215 4.81553   1
  -4   6   5 144.856 5.96212   1
  -3   6   5 162.488 5.22034   1
  -2   6   5 354.548 6.14729   1
  -1   6   5 246.631 6.79980   1
   0   6   5 99.8063 4.18539   1
   1   6   5 -0.4159 2.73285   1
   2   6   5 52.7877 4.97338   1
   3   6   5 40.8661 4.79150   1
   4   6   5 58.9309 6.14069   1
   5   6   5 73.8623 6.44367   1
   6   6   5 17.8891 5.48675   1
  -9   7   5 101.269 8.45029   1
  -8   7   5 167.049 8.88770   1
  -7   7   5 16.6070 5.50788   1
  -6   7   5 1.84683 3.57340   1
  -5   7   5 16.4440 4.39575   1
  -4   7   5 57.8487 4.04626   1
  -3   7   5 146.034 6.37630   1
  -2   7   5 537.030 9.56522   1
  -1   7   5 18.5948 3.61502   1
   0   7   5 316.897 8.81696   1
   1   7   5 58.8475 3.88114   1
   2   7   5 2.13759 3.58792   1
   3   7   5 3.31688 4.48256   1
   4   7   5 -2.8510 4.92183   1
   5   7   5 14.1548 6.37277   1
  -9   8   5 22.1288 7.49958   1
  -8   8   5 77.7567 7.45172   1
  -7   8   5 116.063 6.80193   1
  -6   8   5 55.4644 6.25007   1
  -5   8   5 35.6199 4.38339   1
  -4   8   5 63.5326 5.81244   1
  -3   8   5 105.223 4.86436   1
  -2   8   5 103.183 7.46944   1
  -1   8   5 21.2464 5.06982   1
   0   8   5 29.0255 3.83348   1
   1   8   5 62.5099 5.12449   1
   2   8   5 110.032 5.86233   1
   3   8   5 11.0968 4.67641   1
   4   8   5 34.0386 6.96919   1
  -8   9   5 0.13399 6.02060   1
  -7   9   5 207.559 10.4734   1
  -6   9   5 56.4653 5.16341   1
  -5   9   5 7.87844 3.83084   1
  -4   9   5 -5.2539 3.06395   1
  -3   9   5 1.44558 4.69154   1
  -2   9   5 2.63735 5.12476   1
  -1   9   5 113.732 7.86341   1
   0   9   5 12.8338 5.15278   1
   1   9   5 36.9290 4.56248   1
   2   9   5 68.6029 6.83363   1
  -6  10   5 7.09182 4.62260   1
  -5  10   5 25.5164 6.43317   1
  -4  10   5 18.1358 6.39567   1
  -3  10   5 0.28512 5.53441   1
  -2  10   5 48.6984 6.19309   1
  -1  10   5 79.2887 7.80209   1
   0  10   5 19.3451 7.66931   1
   0 -11   7 232.701 27.6208  -2
   0 -11   6 232.701 27.6208   1
   1 -11   7 19.6939 15.7150  -2
   1 -11   6 19.6939 15.7150   1
   2 -11   7 35.1331 20.3165  -2
   2 -11   6 35.1331 20.3165   1
   3 -11   7 7.22724 13.5979  -2
   3 -11   6 7.22724 13.5979   1
   3 -11   6 -52.347 63.9643  -2
   3 -11   6 -52.347 63.9643   1
   4 -11   7 37.6309 17.2063  -2
   4 -11   6 37.6309 17.2063   1
   4 -11   6 83.8274 47.7236  -2
   4 -11   6 83.8274 47.7236   1
   4 -11   7 290.526 105.582  -2
   4 -11   6 290.526 105.582  -2
   4 -11   6 290.526 105.582   1
   5 -11   6 4.89873 11.3827  -2
   5 -11   6 4.89873 11.3827   1
  -2 -10   7 81.3352 19.6605  -2
  -2 -10   6 81.3352 19.6605   1
  -1 -10   7 53.7672 13.5351  -2
  -1 -10   6 53.7672 13.5351   1
   0 -10   7 62.4869 11.7621  -2
   0 -10   6 62.4869 11.7621   1
   1 -10   7 -0.5278 10.4598  -2
   1 -10   6 -0.5278 10.4598   1
   2 -10   7 -4.2973 9.81801  -2
   2 -10   6 -4.2973 9.81801   1
   3 -10   7 17.1258 13.0955  -2
   3 -10   6 17.1258 13.0955   1
   3 -10   6 -27.027 55.2454  -2
   3 -10   6 -27.027 55.2454   1
   4 -10   6 20.7570 10.3858  -2
   4 -10   6 20.7570 10.3858   1
   5 -10   6 -20.278 11.3623  -2
   5 -10   6 -20.278 11.3623   1
   6 -10   6 85.3920 13.3258  -2
   6 -10   6 85.3920 13.3258   1
   7 -10   6 33.2092 11.9788  -2
   7 -10   6 33.2092 11.9788   1
  -3  -9   7 23.3916 24.9268  -2
  -3  -9   6 23.3916 24.9268   1
  -2  -9   7 18.7145 12.7183  -2
  -2  -9   6 18.7145 12.7183   1
  -1  -9   7 5.00763 10.9147  -2
  -1  -9   6 5.00763 10.9147   1
   0  -9   7 465.752 15.8097  -2
   0  -9   6 465.752 15.8097   1
   1  -9   7 23.2473 12.1153  -2
   1  -9   6 23.2473 12.1153   1
   2  -9   7 441.641 27.5198  -2
   2  -9   6 441.641 27.5198   1
   3  -9   6 282.893 21.0231  -2
   3  -9   6 282.893 21.0231   1
   3  -9   7 481.593 46.6245  -2
   3  -9   6 481.593 46.6245   1
   4  -9   6 127.656 10.7810  -2
   4  -9   6 127.656 10.7810   1
   5  -9   6 374.755 17.6470  -2
   5  -9   6 374.755 17.6470   1
   6  -9   6 57.9129 7.97039  -2
   6  -9   6 57.9129 7.97039   1
   7  -9   6 38.4568 15.0488  -2
   7  -9   6 38.4568 15.0488   1
   8  -9   6 271.641 20.8887  -2
   8  -9   6 271.641 20.8887   1
  -5  -8   7 -5.5729 59.2982  -2
  -5  -8   6 -5.5729 59.2982   1
  -4  -8   7 69.3454 20.2744  -2
  -4  -8   6 69.3454 20.2744   1
  -3  -8   7 105.341 14.5807  -2
  -3  -8   6 105.341 14.5807   1
  -2  -8   7 49.7931 12.7834  -2
  -2  -8   6 49.7931 12.7834   1
  -1  -8   7 148.215 10.5445  -2
  -1  -8   6 148.215 10.5445   1
   0  -8   7 133.421 11.2397  -2
   0  -8   6 133.421 11.2397   1
   1  -8   7 178.284 10.0633  -2
   1  -8   6 178.284 10.0633   1
   2  -8   7 494.877 29.3271  -2
   2  -8   6 494.877 29.3271   1
   2  -8   6 315.005 39.2600  -2
   2  -8   6 315.005 39.2600   1
   3  -8   6 191.600 9.60340  -2
   3  -8   6 191.600 9.60340   1
   4  -8   6 46.2187 9.39202  -2
   4  -8   6 46.2187 9.39202   1
   5  -8   6 68.2811 7.06131  -2
   5  -8   6 68.2811 7.06131   1
   6  -8   6 196.335 14.5469  -2
   6  -8   6 196.335 14.5469   1
   7  -8   6 653.709 25.1365  -2
   7  -8   6 653.709 25.1365   1
   8  -8   6 47.7253 16.8336  -2
   8  -8   6 47.7253 16.8336   1
   9  -8   5 141.478 37.9824  -2
   9  -8   6 141.478 37.9824   1
   9  -8   6 100.977 60.2212  -2
   9  -8   6 100.977 60.2212   1
  -6  -7   8 151.902 68.3715  -2
  -6  -7   6 151.902 68.3715   1
  -5  -7   7 305.592 64.2197  -2
  -5  -7   6 305.592 64.2197   1
  -4  -7   7 56.6878 22.7834  -2
  -4  -7   6 56.6878 22.7834   1
  -3  -7   7 22.6890 13.0230  -2
  -3  -7   6 22.6890 13.0230   1
  -2  -7   7 4.57738 10.0477  -2
  -2  -7   6 4.57738 10.0477   1
  -1  -7   7 21.9460 10.6994  -2
  -1  -7   6 21.9460 10.6994   1
   0  -7   7 173.464 12.3361  -2
   0  -7   6 173.464 12.3361   1
   1  -7   7 233.786 16.9653  -2
   1  -7   6 233.786 16.9653   1
   2  -7   6 30.4492 8.70164  -2
   2  -7   6 30.4492 8.70164   1
   3  -7   6 109.186 7.38805  -2
   3  -7   6 109.186 7.38805   1
   4  -7   6 4.78259 6.27393  -2
   4  -7   6 4.78259 6.27393   1
   5  -7   6 167.065 9.23506  -2
   5  -7   6 167.065 9.23506   1
   6  -7   6 346.512 14.7395  -2
   6  -7   6 346.512 14.7395   1
   7  -7   6 756.266 27.0822  -2
   7  -7   6 756.266 27.0822   1
   8  -7   5 -15.601 49.7778  -2
   8  -7   6 -15.601 49.7778   1
   8  -7   6 17.8099 30.9650  -2
   8  -7   6 17.8099 30.9650   1
   9  -7   5 50.8329 23.2946  -2
   9  -7   6 50.8329 23.2946   1
  -7  -6   6 20.5874 10.1709   1
  -6  -6   6 8.55909 6.84641   1
  -5  -6   7 104.058 22.1731  -2
  -5  -6   6 104.058 22.1731   1
  -4  -6   7 269.821 14.4093  -2
  -4  -6   6 269.821 14.4093   1
  -3  -6   7 103.593 11.0058  -2
  -3  -6   6 103.593 11.0058   1
  -2  -6   7 405.511 14.1585  -2
  -2  -6   6 405.511 14.1585   1
  -1  -6   7 207.440 11.4811  -2
  -1  -6   6 207.440 11.4811   1
   0  -6   7 11.5401 10.3681  -2
   0  -6   6 11.5401 10.3681   1
   1  -6   6 299.647 16.5476  -2
   1  -6   6 299.647 16.5476   1
   2  -6   6 193.880 9.74153  -2
   2  -6   6 193.880 9.74153   1
   3  -6   6 12.8017 7.50342  -2
   3  -6   6 12.8017 7.50342   1
   4  -6   6 21.3741 5.97886  -2
   4  -6   6 21.3741 5.97886   1
   5  -6   6 133.979 9.23944  -2
   5  -6   6 133.979 9.23944   1
   6  -6   6 22.6485 10.2052  -2
   6  -6   6 22.6485 10.2052   1
   7  -6   6 3.38695 18.9709  -2
   7  -6   6 3.38695 18.9709   1
   8  -6   5 371.855 20.3571  -2
   8  -6   6 371.855 20.3571   1
   9  -6   5 301.647 21.0830  -2
   9  -6   6 301.647 21.0830   1
  -7  -5   8 21.1455 35.8382  -2
  -7  -5   6 21.1455 35.8382   1
  -6  -5   7 95.0555 81.8522  -2
  -6  -5   6 95.0555 81.8522   1
  -5  -5   7 140.395 15.8459  -2
  -5  -5   6 140.395 15.8459   1
  -4  -5   7 50.0744 11.8893  -2
  -4  -5   6 50.0744 11.8893   1
  -3  -5   7 281.538 13.9955  -2
  -3  -5   6 281.538 13.9955   1
  -2  -5   7 78.2026 7.67575  -2
  -2  -5   6 78.2026 7.67575   1
  -1  -5   7 154.319 10.6032  -2
  -1  -5   6 154.319 10.6032   1
   0  -5   6 137.162 4.84537   1
   1  -5   6 225.870 11.7903  -2
   1  -5   6 225.870 11.7903   1
   2  -5   6 865.329 14.8564  -2
   2  -5   6 865.329 14.8564   1
   3  -5   6 6.78082 5.53463  -2
   3  -5   6 6.78082 5.53463   1
   4  -5   6 724.750 14.5752  -2
   4  -5   6 724.750 14.5752   1
   5  -5   6 873.079 23.5043  -2
   5  -5   6 873.079 23.5043   1
   6  -5   6 405.361 12.6211  -2
   6  -5   6 405.361 12.6211   1
   7  -5   6 152.248 58.4780  -2
   7  -5   6 152.248 58.4780   1
   7  -5   5 128.536 27.0283  -2
   7  -5   6 128.536 27.0283   1
   8  -5   5 251.521 20.7199  -2
   8  -5   6 251.521 20.7199   1
   9  -5   5 590.348 26.6062  -2
   9  -5   6 590.348 26.6062   1
  10  -5   5 86.9698 24.1254  -2
  10  -5   6 86.9698 24.1254   1
  -8  -4   8 33.4387 61.9600  -2
  -8  -4   6 33.4387 61.9600   1
  -7  -4   6 5.17294 7.01805   1
  -6  -4   7 87.3330 23.0995  -2
  -6  -4   6 87.3330 23.0995   1
  -5  -4   7 19.2593 12.2370  -2
  -5  -4   6 19.2593 12.2370   1
  -4  -4   7 692.177 19.7557  -2
  -4  -4   6 692.177 19.7557   1
  -3  -4   7 99.0229 10.5288  -2
  -3  -4   6 99.0229 10.5288   1
  -2  -4   7 616.817 19.1944  -2
  -2  -4   6 616.817 19.1944   1
  -1  -4   6 8.63424 3.30406   1
   0  -4   6 41.5683 23.9513  -2
   0  -4   6 41.5683 23.9513   1
   1  -4   6 27.2816 12.6000  -2
   1  -4   6 27.2816 12.6000   1
   2  -4   6 890.065 16.6566  -2
   2  -4   6 890.065 16.6566   1
   3  -4   6 7.25692 8.06497  -2
   3  -4   6 7.25692 8.06497   1
   4  -4   6 187.826 12.7370  -2
   4  -4   6 187.826 12.7370   1
   5  -4   6 83.1429 17.3875  -2
   5  -4   6 83.1429 17.3875   1
   6  -4   5 -12.907 39.6518  -2
   6  -4   6 -12.907 39.6518   1
   6  -4   6 13.7199 36.9570  -2
   6  -4   6 13.7199 36.9570   1
   7  -4   5 88.1109 15.5540  -2
   7  -4   6 88.1109 15.5540   1
   8  -4   5 9.03926 17.7330  -2
   8  -4   6 9.03926 17.7330   1
   9  -4   5 30.1446 19.9208  -2
   9  -4   6 30.1446 19.9208   1
  10  -4   5 57.3358 20.8740  -2
  10  -4   6 57.3358 20.8740   1
  -8  -3   6 14.5359 7.52052   1
  -7  -3   7 107.650 69.3260  -2
  -7  -3   6 107.650 69.3260   1
  -6  -3   7 -1.7592 17.1514  -2
  -6  -3   6 -1.7592 17.1514   1
  -5  -3   7 52.6366 13.3656  -2
  -5  -3   6 52.6366 13.3656   1
  -4  -3   7 1092.82 27.6937  -2
  -4  -3   6 1092.82 27.6937   1
  -3  -3   7 6.20299 15.9688  -2
  -3  -3   6 6.20299 15.9688   1
  -2  -3   6 49.0696 4.72969   1
  -1  -3   6 128.350 41.4454  -2
  -1  -3   6 128.350 41.4454   1
   0  -3   6 167.088 19.5883  -2
   0  -3   6 167.088 19.5883   1
   1  -3   6 17.0022 13.3539  -2
   1  -3   6 17.0022 13.3539   1
   2  -3   6 293.731 18.3635  -2
   2  -3   6 293.731 18.3635   1
   3  -3   6 1239.86 58.7757  -2
   3  -3   6 1239.86 58.7757   1
   4  -3   6 5.88588 3.43148   1
   5  -3   6 19.4836 3.88269   1
   6  -3   5 5.53824 17.4958  -2
   6  -3   6 5.53824 17.4958   1
   7  -3   5 42.5367 13.7176  -2
   7  -3   6 42.5367 13.7176   1
   8  -3   5 56.4892 16.5827  -2
   8  -3   6 56.4892 16.5827   1
   9  -3   5 46.7352 18.3279  -2
   9  -3   6 46.7352 18.3279   1
  10  -3   5 22.2232 18.4492  -2
  10  -3   6 22.2232 18.4492   1
  -9  -2   8 -12.104 102.001  -2
  -9  -2   6 -12.104 102.001   1
  -8  -2   7 36.6609 80.1895  -2
  -8  -2   6 36.6609 80.1895   1
  -7  -2   7 128.579 37.7854  -2
  -7  -2   6 128.579 37.7854   1
  -6  -2   7 16.6797 14.3863  -2
  -6  -2   6 16.6797 14.3863   1
  -5  -2   7 44.1924 16.1880  -2
  -5  -2   6 44.1924 16.1880   1
  -4  -2   7 336.680 22.4663  -2
  -4  -2   6 336.680 22.4663   1
  -3  -2   6 55.0969 5.16807   1
  -2  -2   6 80.8460 4.93469   1
  -1  -2   6 189.912 40.5950  -2
  -1  -2   6 189.912 40.5950   1
   0  -2   6 150.781 27.1527  -2
   0  -2   6 150.781 27.1527   1
   1  -2   6 5.65537 10.4624  -2
   1  -2   6 5.65537 10.4624   1
   2  -2   6 1699.09 84.2203  -2
   2  -2   6 1699.09 84.2203   1
   3  -2   6 667.571 12.5658   1
   4  -2   6 10.6707 3.96488   1
   5  -2   5 258.209 44.4033  -2
   5  -2   6 258.209 44.4033   1
   6  -2   5 161.839 18.9034  -2
   6  -2   6 161.839 18.9034   1
   7  -2   5 325.534 17.8594  -2
   7  -2   6 325.534 17.8594   1
   8  -2   5 302.297 21.6682  -2
   8  -2   6 302.297 21.6682   1
   9  -2   5 0.60023 22.4562  -2
   9  -2   6 0.60023 22.4562   1
  -9  -1   6 8.58658 9.92671   1
  -8  -1   7 129.266 76.5904  -2
  -8  -1   6 129.266 76.5904   1
  -7  -1   7 188.716 27.9474  -2
  -7  -1   6 188.716 27.9474   1
  -6  -1   7 384.811 51.4063  -2
  -6  -1   6 384.811 51.4063   1
  -5  -1   7 204.136 41.0591  -2
  -5  -1   6 204.136 41.0591   1
  -4  -1   6 44.2121 5.07588   1
  -3  -1   6 4.72322 4.04681   1
  -2  -1   6 307.197 8.90578   1
  -1  -1   6 1116.38 14.7014   1
   0  -1   6 1121.12 66.3277  -2
   0  -1   6 1121.12 66.3277   1
   1  -1   6 3062.81 28.3360   1
   2  -1   6 18.2422 3.17843   1
   3  -1   6 97.6241 5.38117   1
   4  -1   6 701.104 12.0224   1
   5  -1   5 91.0748 49.2512  -2
   5  -1   6 91.0748 49.2512   1
   6  -1   5 153.082 15.5019  -2
   6  -1   6 153.082 15.5019   1
   7  -1   5 133.749 15.7048  -2
   7  -1   6 133.749 15.7048   1
   8  -1   5 100.545 18.4960  -2
   8  -1   6 100.545 18.4960   1
   9  -1   5 49.3515 26.0375  -2
   9  -1   6 49.3515 26.0375   1
 -10   0   6 4.67445 9.90582   1
  -9   0   6 25.3026 7.66460   1
  -8   0   6 13.3196 6.40919   1
  -7   0   7 33.2831 60.5413  -2
  -7   0   6 33.2831 60.5413   1
  -6   0   7 74.3092 54.1193  -2
  -6   0   6 74.3092 54.1193   1
  -5   0   6 56.2710 6.03062   1
  -4   0   6 -2.4262 4.50093   1
  -3   0   6 118.965 6.02343   1
  -2   0   6 96.0850 5.60304   1
  -1   0   6 2047.92 21.2866   1
   0   0   6 306.676 6.96590   1
   1   0   6 295.906 6.17889   1
   2   0   6 488.815 9.15654   1
   3   0   6 104.347 5.73384   1
   4   0   6 5.79854 2.87232   1
   5   0   5 798.116 33.5177  -2
   5   0   6 798.116 33.5177   1
   6   0   5 108.857 12.7799  -2
   6   0   6 108.857 12.7799   1
   7   0   5 3.20187 15.6259  -2
   7   0   6 3.20187 15.6259   1
   8   0   5 51.6916 27.1504  -2
   8   0   6 51.6916 27.1504   1
   9   0   5 51.4592 60.1616  -2
   9   0   6 51.4592 60.1616   1
 -10   1   6 50.2151 9.57227   1
  -9   1   6 190.003 11.8101   1
  -8   1   6 12.8995 6.01720   1
  -7   1   6 18.3508 5.31101   1
  -6   1   6 90.5252 7.37118   1
  -5   1   6 24.7058 4.67806   1
  -4   1   6 18.4926 4.58787   1
  -3   1   6 422.633 10.4795   1
  -2   1   6 22.3901 3.51822   1
  -1   1   6 369.892 6.94485   1
   0   1   6 1542.83 15.9912   1
   1   1   6 195.197 5.87155   1
   2   1   6 0.37899 3.14294   1
   3   1   6 7.90719 3.64828   1
   4   1   6 277.094 9.45606   1
   5   1   5 580.293 33.8563  -2
   5   1   6 580.293 33.8563   1
   6   1   5 538.383 30.6213  -2
   6   1   6 538.383 30.6213   1
   7   1   5 101.847 30.9553  -2
   7   1   6 101.847 30.9553   1
   8   1   5 -8.5110 53.1531  -2
   8   1   6 -8.5110 53.1531   1
   9   1   5 71.8412 57.1985  -2
   9   1   6 71.8412 57.1985   1
 -10   2   6 2.76433 8.05854   1
  -9   2   6 78.3734 8.66552   1
  -8   2   6 475.624 15.5472   1
  -7   2   6 43.0153 6.65194   1
  -6   2   6 56.8566 6.24024   1
  -5   2   6 12.2338 4.73155   1
  -4   2   6 69.9418 5.83462   1
  -3   2   6 1560.26 19.2281   1
  -2   2   6 637.502 10.2672   1
  -1   2   6 2.11185 2.37139   1
   0   2   6 461.798 7.76055   1
   1   2   6 775.835 11.4954   1
   2   2   6 69.4615 4.43621   1
   3   2   6 239.760 7.09702   1
   4   2   6 -0.1329 3.78367   1
   5   2   5 360.935 28.9596  -2
   5   2   6 360.935 28.9596   1
   6   2   5 212.989 59.1168  -2
   6   2   6 212.989 59.1168   1
   7   2   5 106.780 60.5311  -2
   7   2   6 106.780 60.5311   1
   8   2   6 28.6275 7.51493   1
 -10   3   6 80.6343 10.6200   1
  -9   3   6 76.6084 9.49227   1
  -8   3   6 25.3962 6.46205   1
  -7   3   6 390.764 12.7617   1
  -6   3   6 222.220 10.1227   1
  -5   3   6 34.3187 4.45638   1
  -4   3   6 190.108 6.99262   1
  -3   3   6 186.226 6.70614   1
  -2   3   6 1159.37 14.6000   1
  -1   3   6 1.67483 2.42360   1
   0   3   6 760.452 9.66435   1
   1   3   6 421.667 7.88534   1
   2   3   6 610.537 10.7658   1
   3   3   6 116.872 5.80518   1
   4   3   6 891.956 15.7019   1
   5   3   6 43.0327 5.67606   1
   6   3   5 239.247 62.3330  -2
   6   3   6 239.247 62.3330   1
   7   3   6 -0.5718 5.85047   1
   8   3   6 47.9837 9.78903   1
 -10   4   6 19.4658 8.32218   1
  -9   4   6 53.0007 8.00579   1
  -8   4   6 -1.2138 5.62293   1
  -7   4   6 24.6714 5.31847   1
  -6   4   6 125.236 7.85471   1
  -5   4   6 46.3140 5.34597   1
  -4   4   6 17.0431 3.60893   1
  -3   4   6 182.926 5.98611   1
  -2   4   6 2.75585 1.80119   1
  -1   4   6 23.7007 2.72027   1
   0   4   6 222.532 5.71339   1
   1   4   6 20.8724 3.17761   1
   2   4   6 11.6575 3.00517   1
   3   4   6 14.9214 3.77212   1
   4   4   6 327.437 10.4475   1
   5   4   6 88.4562 6.84831   1
   6   4   6 11.4367 5.60477   1
   7   4   6 33.0061 6.77723   1
 -10   5   6 3.55389 8.31136   1
  -9   5   6 -3.0322 5.84670   1
  -8   5   6 69.1166 7.22516   1
  -7   5   6 49.2638 5.97194   1
  -6   5   6 166.191 8.17584   1
  -5   5   6 12.5136 3.24902   1
  -4   5   6 9.03583 3.36473   1
  -3   5   6 171.337 6.16760   1
  -2   5   6 70.6477 3.78025   1
  -1   5   6 94.7396 4.23584   1
   0   5   6 56.8181 3.75831   1
   1   5   6 334.371 7.49159   1
   2   5   6 17.8427 3.82097   1
   3   5   6 3.83774 3.94399   1
   4   5   6 3.36568 4.12864   1
   5   5   6 188.093 10.3487   1
   6   5   6 25.5254 6.03642   1
  -9   6   6 3.67637 6.05058   1
  -8   6   6 75.8885 6.79299   1
  -7   6   6 7.44762 4.76814   1
  -6   6   6 364.141 9.88672   1
  -5   6   6 54.1547 5.50284   1
  -4   6   6 50.0460 4.26757   1
  -3   6   6 289.149 6.64659   1
  -2   6   6 481.495 8.26147   1
  -1   6   6 47.6395 3.48917   1
   0   6   6 30.8259 3.19930   1
   1   6   6 120.316 5.65364   1
   2   6   6 11.6473 3.97621   1
   3   6   6 9.05494 4.31410   1
   4   6   6 8.59495 5.05834   1
   5   6   6 33.6204 5.59701   1
  -9   7   6 17.9791 5.83430   1
  -8   7   6 51.3992 5.93595   1
  -7   7   6 95.4011 7.51473   1
  -6   7   6 85.7350 6.57729   1
  -5   7   6 122.250 6.71877   1
  -4   7   6 156.832 5.75957   1
  -3   7   6 113.203 4.21195   1
  -2   7   6 85.6399 4.91127   1
  -1   7   6 0.05957 2.90653   1
   0   7   6 11.7086 2.24680   1
   1   7   6 39.9314 4.43699   1
   2   7   6 -4.8078 3.59706   1
   3   7   6 13.8357 4.47698   1
   4   7   6 1.64451 5.32034   1
  -8   8   6 23.4793 6.25800   1
  -7   8   6 191.935 9.43701   1
  -6   8   6 28.3315 5.71686   1
  -5   8   6 165.021 7.41797   1
  -4   8   6 125.150 6.83043   1
  -3   8   6 8.03268 3.31194   1
  -2   8   6 391.348 9.03303   1
  -1   8   6 3.05362 3.25123   1
   0   8   6 13.4123 3.86814   1
   1   8   6 5.04196 4.30139   1
   2   8   6 12.1266 4.16230   1
   3   8   6 -1.5709 4.61488   1
  -8   9   6 6.60400 10.8317   1
  -7   9   6 20.0725 4.89898   1
  -6   9   6 8.21696 4.25395   1
  -5   9   6 26.4113 4.99385   1
  -4   9   6 73.8022 4.85271   1
  -3   9   6 3.96094 5.16908   1
  -2   9   6 102.444 8.80450   1
  -1   9   6 36.4119 6.28930   1
   0   9   6 10.0153 5.69022   1
   1   9   6 5.69508 4.43029   1
   2   9   6 3.69474 5.42493   1
  -6  10   6 32.7181 5.33841   1
  -5  10   6 3.85501 2.58912   1
  -4  10   6 38.1338 6.99663   1
  -3  10   6 44.8200 7.67723   1
  -2  10   6 1.44425 5.70686   1
  -1  10   6 35.2128 7.75624   1
   0  10   6 16.8216 6.37103   1
   0 -11   7 230.313 9.99873   1
   1 -11   8 11.6529 12.5809  -2
   1 -11   7 11.6529 12.5809   1
   2 -11   8 -22.368 13.6907  -2
   2 -11   7 -22.368 13.6907   1
   3 -11   8 21.0449 12.6247  -2
   3 -11   7 21.0449 12.6247   1
   4 -11   7 49.3902 47.1232  -2
   4 -11   7 49.3902 47.1232   1
   4 -11   8 24.9911 21.2596  -2
   4 -11   7 24.9911 21.2596   1
   5 -11   7 10.7566 16.1498  -2
   5 -11   7 10.7566 16.1498   1
  -2 -10   8 4.00892 19.9163  -2
  -2 -10   7 4.00892 19.9163   1
  -1 -10   8 134.426 10.6015  -2
  -1 -10   7 134.426 10.6015   1
   0 -10   8 84.6546 12.9262  -2
   0 -10   7 84.6546 12.9262   1
   1 -10   8 -9.1821 11.6452  -2
   1 -10   7 -9.1821 11.6452   1
   2 -10   8 10.1007 12.3773  -2
   2 -10   7 10.1007 12.3773   1
   3 -10   8 49.8463 20.1491  -2
   3 -10   7 49.8463 20.1491   1
   3 -10   7 118.501 63.2182  -2
   3 -10   7 118.501 63.2182   1
   4 -10   7 54.2405 15.8105  -2
   4 -10   7 54.2405 15.8105   1
   5 -10   7 4.21755 9.10196  -2
   5 -10   7 4.21755 9.10196   1
   6 -10   7 -11.471 9.07317  -2
   6 -10   7 -11.471 9.07317   1
   7 -10   7 8.49185 9.36095  -2
   7 -10   7 8.49185 9.36095   1
  -3  -9   8 109.744 19.8123  -2
  -3  -9   7 109.744 19.8123   1
  -2  -9   8 46.5407 15.2637  -2
  -2  -9   7 46.5407 15.2637   1
  -1  -9   8 92.4305 9.64151  -2
  -1  -9   7 92.4305 9.64151   1
   0  -9   8 294.258 15.4259  -2
   0  -9   7 294.258 15.4259   1
   1  -9   8 250.288 14.2510  -2
   1  -9   7 250.288 14.2510   1
   2  -9   8 227.074 15.3797  -2
   2  -9   7 227.074 15.3797   1
   3  -9   7 568.493 28.7631  -2
   3  -9   7 568.493 28.7631   1
   4  -9   7 435.525 14.0008  -2
   4  -9   7 435.525 14.0008   1
   5  -9   7 437.907 17.5515  -2
   5  -9   7 437.907 17.5515   1
   6  -9   7 155.444 10.7719  -2
   6  -9   7 155.444 10.7719   1
   7  -9   7 21.6691 11.2736  -2
   7  -9   7 21.6691 11.2736   1
   8  -9   7 263.175 21.6771  -2
   8  -9   7 263.175 21.6771   1
  -5  -8   7 19.7928 7.80192   1
  -4  -8   8 62.2481 27.6648  -2
  -4  -8   7 62.2481 27.6648   1
  -3  -8   8 42.6977 13.5687  -2
  -3  -8   7 42.6977 13.5687   1
  -2  -8   8 2.74844 12.7803  -2
  -2  -8   7 2.74844 12.7803   1
  -1  -8   8 184.074 12.5122  -2
  -1  -8   7 184.074 12.5122   1
   0  -8   8 190.586 12.8690  -2
   0  -8   7 190.586 12.8690   1
   1  -8   8 18.6786 10.4011  -2
   1  -8   7 18.6786 10.4011   1
   2  -8   7 716.254 42.2025  -2
   2  -8   7 716.254 42.2025   1
   3  -8   7 49.6202 8.07928  -2
   3  -8   7 49.6202 8.07928   1
   4  -8   7 7.90729 7.87975  -2
   4  -8   7 7.90729 7.87975   1
   5  -8   7 192.765 13.0997  -2
   5  -8   7 192.765 13.0997   1
   6  -8   7 47.8981 11.0453  -2
   6  -8   7 47.8981 11.0453   1
   7  -8   7 -11.334 12.6914  -2
   7  -8   7 -11.334 12.6914   1
   8  -8   7 101.223 17.7615  -2
   8  -8   7 101.223 17.7615   1
  -6  -7   7 17.8636 7.02008   1
  -5  -7   7 103.271 8.97491   1
  -4  -7   8 101.368 23.3125  -2
  -4  -7   7 101.368 23.3125   1
  -3  -7   8 14.3805 11.9956  -2
  -3  -7   7 14.3805 11.9956   1
  -2  -7   8 10.2422 11.0404  -2
  -2  -7   7 10.2422 11.0404   1
  -1  -7   8 22.5117 10.7176  -2
  -1  -7   7 22.5117 10.7176   1
   0  -7   8 378.607 14.6921  -2
   0  -7   7 378.607 14.6921   1
   1  -7   8 298.835 21.0016  -2
   1  -7   7 298.835 21.0016   1
   2  -7   7 24.7954 10.7846  -2
   2  -7   7 24.7954 10.7846   1
   3  -7   7 809.345 15.9986  -2
   3  -7   7 809.345 15.9986   1
   4  -7   7 2.97659 7.04694  -2
   4  -7   7 2.97659 7.04694   1
   5  -7   7 302.984 11.6194  -2
   5  -7   7 302.984 11.6194   1
   6  -7   7 89.4364 10.9651  -2
   6  -7   7 89.4364 10.9651   1
   7  -7   7 668.581 24.7343  -2
   7  -7   7 668.581 24.7343   1
   8  -7   7 87.5434 57.3091  -2
   8  -7   7 87.5434 57.3091   1
   8  -7   6 113.770 59.1393  -2
   8  -7   7 113.770 59.1393   1
   9  -7   6 -19.395 29.1157  -2
   9  -7   7 -19.395 29.1157   1
  -6  -6   7 7.88439 6.61995   1
  -5  -6   8 188.198 49.9837  -2
  -5  -6   7 188.198 49.9837   1
  -4  -6   8 384.929 17.9616  -2
  -4  -6   7 384.929 17.9616   1
  -3  -6   8 42.7504 10.9169  -2
  -3  -6   7 42.7504 10.9169   1
  -2  -6   8 -5.3708 8.11569  -2
  -2  -6   7 -5.3708 8.11569   1
  -1  -6   8 91.0948 7.99333  -2
  -1  -6   7 91.0948 7.99333   1
   0  -6   8 3.66669 14.0429  -2
   0  -6   7 3.66669 14.0429   1
   1  -6   7 1070.95 67.5376  -2
   1  -6   7 1070.95 67.5376   1
   2  -6   7 10.4755 8.87806  -2
   2  -6   7 10.4755 8.87806   1
   3  -6   7 639.702 14.2125  -2
   3  -6   7 639.702 14.2125   1
   4  -6   7 50.6872 7.03318  -2
   4  -6   7 50.6872 7.03318   1
   5  -6   7 64.7427 8.89703  -2
   5  -6   7 64.7427 8.89703   1
   6  -6   7 338.388 16.1940  -2
   6  -6   7 338.388 16.1940   1
   7  -6   7 10.0880 20.6408  -2
   7  -6   7 10.0880 20.6408   1
   8  -6   6 342.569 31.2310  -2
   8  -6   7 342.569 31.2310   1
   9  -6   6 58.7525 19.9050  -2
   9  -6   7 58.7525 19.9050   1
  -7  -5   9 51.4203 50.7478  -2
  -7  -5   7 51.4203 50.7478   1
  -6  -5   8 81.9211 80.4191  -2
  -6  -5   7 81.9211 80.4191   1
  -5  -5   8 200.621 23.0131  -2
  -5  -5   7 200.621 23.0131   1
  -4  -5   8 87.3476 14.0149  -2
  -4  -5   7 87.3476 14.0149   1
  -3  -5   8 551.164 17.1580  -2
  -3  -5   7 551.164 17.1580   1
  -2  -5   8 45.0774 8.53054  -2
  -2  -5   7 45.0774 8.53054   1
  -1  -5   8 61.4891 9.77952  -2
  -1  -5   7 61.4891 9.77952   1
   0  -5   7 56.3452 4.18857   1
   1  -5   7 7.27618 11.2048  -2
   1  -5   7 7.27618 11.2048   1
   2  -5   7 39.6149 9.15360  -2
   2  -5   7 39.6149 9.15360   1
   3  -5   7 1.96366 6.58887  -2
   3  -5   7 1.96366 6.58887   1
   4  -5   7 12.4545 8.23423  -2
   4  -5   7 12.4545 8.23423   1
   5  -5   7 205.418 13.1614  -2
   5  -5   7 205.418 13.1614   1
   6  -5   7 234.976 21.0356  -2
   6  -5   7 234.976 21.0356   1
   7  -5   7 255.109 34.9943  -2
   7  -5   7 255.109 34.9943   1
   7  -5   6 281.676 35.7235  -2
   7  -5   7 281.676 35.7235   1
   8  -5   6 49.5544 17.3992  -2
   8  -5   7 49.5544 17.3992   1
   9  -5   6 603.887 30.5858  -2
   9  -5   7 603.887 30.5858   1
  -8  -4   7 19.9159 9.97352   1
  -7  -4   7 40.7464 6.51220   1
  -6  -4   8 248.299 48.4491  -2
  -6  -4   7 248.299 48.4491   1
  -5  -4   8 101.843 20.0357  -2
  -5  -4   7 101.843 20.0357   1
  -4  -4   8 90.8994 16.2658  -2
  -4  -4   7 90.8994 16.2658   1
  -3  -4   8 13.0478 9.58332  -2
  -3  -4   7 13.0478 9.58332   1
  -2  -4   8 746.305 56.6569  -2
  -2  -4   7 746.305 56.6569   1
  -1  -4   7 614.862 11.3063   1
   0  -4   7 37.0823 28.8938  -2
   0  -4   7 37.0823 28.8938   1
   1  -4   7 307.152 17.0148  -2
   1  -4   7 307.152 17.0148   1
   2  -4   7 16.9714 7.79462  -2
   2  -4   7 16.9714 7.79462   1
   3  -4   7 11.0184 8.48997  -2
   3  -4   7 11.0184 8.48997   1
   4  -4   7 11.3455 10.3848  -2
   4  -4   7 11.3455 10.3848   1
   5  -4   7 29.1941 29.9601  -2
   5  -4   7 29.1941 29.9601   1
   6  -4   7 58.7534 7.51262   1
   7  -4   6 225.173 19.6712  -2
   7  -4   7 225.173 19.6712   1
   8  -4   6 18.9868 17.1443  -2
   8  -4   7 18.9868 17.1443   1
   9  -4   6 5.71740 17.3237  -2
   9  -4   7 5.71740 17.3237   1
  -8  -3   7 4.73406 7.42266   1
  -7  -3   8 126.112 75.5862  -2
  -7  -3   7 126.112 75.5862   1
  -6  -3   8 96.4804 30.3953  -2
  -6  -3   7 96.4804 30.3953   1
  -5  -3   8 22.0642 17.9337  -2
  -5  -3   7 22.0642 17.9337   1
  -4  -3   8 479.352 27.2237  -2
  -4  -3   7 479.352 27.2237   1
  -3  -3   8 -5.4410 38.7911  -2
  -3  -3   7 -5.4410 38.7911   1
  -2  -3   7 178.826 6.70131   1
  -1  -3   7 1302.31 85.0726  -2
  -1  -3   7 1302.31 85.0726   1
   0  -3   7 694.427 54.3048  -2
   0  -3   7 694.427 54.3048   1
   1  -3   7 37.6106 11.2221  -2
   1  -3   7 37.6106 11.2221   1
   2  -3   7 7.14201 16.2348  -2
   2  -3   7 7.14201 16.2348   1
   3  -3   7 253.051 40.2385  -2
   3  -3   7 253.051 40.2385   1
   4  -3   7 95.1229 6.02411   1
   5  -3   7 61.3803 4.90091   1
   6  -3   6 41.7559 29.2259  -2
   6  -3   7 41.7559 29.2259   1
   7  -3   6 54.0373 15.9175  -2
   7  -3   7 54.0373 15.9175   1
   8  -3   6 182.321 23.3565  -2
   8  -3   7 182.321 23.3565   1
   9  -3   6 87.5121 22.3537  -2
   9  -3   7 87.5121 22.3537   1
  -9  -2   7 7.28264 8.83970   1
  -8  -2   8 36.0626 81.3122  -2
  -8  -2   7 36.0626 81.3122   1
  -7  -2   8 67.5007 68.3210  -2
  -7  -2   7 67.5007 68.3210   1
  -6  -2   8 71.4102 46.2838  -2
  -6  -2   7 71.4102 46.2838   1
  -5  -2   8 163.885 26.4309  -2
  -5  -2   7 163.885 26.4309   1
  -4  -2   7 367.654 10.8968   1
  -3  -2   7 511.374 11.3526   1
  -2  -2   7 178.565 7.47836   1
  -1  -2   7 94.6999 5.41831   1
   0  -2   7 -2.6908 29.3777  -2
   0  -2   7 -2.6908 29.3777   1
   1  -2   7 291.815 38.7582  -2
   1  -2   7 291.815 38.7582   1
   2  -2   7 2546.21 27.9846   1
   3  -2   7 631.575 13.0643   1
   4  -2   7 242.114 7.52144   1
   5  -2   7 242.948 8.00192   1
   6  -2   6 161.368 17.8997  -2
   6  -2   7 161.368 17.8997   1
   7  -2   6 337.530 20.1859  -2
   7  -2   7 337.530 20.1859   1
   8  -2   6 238.132 25.3079  -2
   8  -2   7 238.132 25.3079   1
   9  -2   6 81.6731 20.4341  -2
   9  -2   7 81.6731 20.4341   1
  -9  -1   7 30.3132 10.2552   1
  -8  -1   7 101.862 10.4949   1
  -7  -1   7 10.3248 6.35682   1
  -6  -1   7 219.761 9.51417   1
  -5  -1   7 162.369 8.94564   1
  -4  -1   7 610.532 13.1902   1
  -3  -1   7 4.58096 3.87241   1
  -2  -1   7 388.667 9.40707   1
  -1  -1   7 63.8911 4.26178   1
   0  -1   7 28.5290 2.85668   1
   1  -1   7 176.430 6.23640   1
   2  -1   7 1.62606 3.01334   1
   3  -1   7 194.129 8.35087   1
   4  -1   7 26.2152 3.44391   1
   5  -1   7 23.8894 4.64770   1
   6  -1   6 27.2636 15.4314  -2
   6  -1   7 27.2636 15.4314   1
   7  -1   6 125.683 19.7220  -2
   7  -1   7 125.683 19.7220   1
   8  -1   6 185.067 28.3933  -2
   8  -1   7 185.067 28.3933   1
   9  -1   6 -42.145 25.8868  -2
   9  -1   7 -42.145 25.8868   1
  -9   0   7 143.205 11.0605   1
  -8   0   7 8.05991 8.11941   1
  -7   0   7 41.2281 6.09803   1
  -6   0   7 24.9772 5.10767   1
  -5   0   7 7.26814 4.67093   1
  -4   0   7 278.632 10.1939   1
  -3   0   7 295.245 9.28175   1
  -2   0   7 351.630 8.87956   1
  -1   0   7 22.9737 3.48256   1
   0   0   7 39.7824 3.59634   1
   1   0   7 326.914 7.00595   1
   2   0   7 163.575 6.26684   1
   3   0   7 4.01261 3.47921   1
   4   0   7 276.439 8.09573   1
   5   0   6 750.200 77.0236  -2
   5   0   7 750.200 77.0236   1
   6   0   6 240.509 34.0926  -2
   6   0   7 240.509 34.0926   1
   7   0   6 -17.049 24.7858  -2
   7   0   7 -17.049 24.7858   1
   8   0   6 5.59002 29.8023  -2
   8   0   7 5.59002 29.8023   1
   9   0   6 87.3974 60.2863  -2
   9   0   7 87.3974 60.2863   1
 -10   1   7 7.30115 9.47956   1
  -9   1   7 -1.4430 7.07443   1
  -8   1   7 23.6185 7.97074   1
  -7   1   7 106.972 8.86049   1
  -6   1   7 163.000 8.85644   1
  -5   1   7 571.352 13.7505   1
  -4   1   7 -1.5762 3.53139   1
  -3   1   7 165.966 7.45123   1
  -2   1   7 278.637 8.06539   1
  -1   1   7 48.8764 4.12777   1
   0   1   7 249.412 6.48155   1
   1   1   7 1381.63 17.9721   1
   2   1   7 5.30875 3.56459   1
   3   1   7 81.8075 5.31239   1
   4   1   7 47.1567 5.07481   1
   5   1   7 55.9994 6.31620   1
   6   1   6 421.493 45.3552  -2
   6   1   7 421.493 45.3552   1
   7   1   6 47.7860 60.3580  -2
   7   1   7 47.7860 60.3580   1
   8   1   6 44.4612 50.3833  -2
   8   1   7 44.4612 50.3833   1
 -10   2   7 4.79917 9.38026   1
  -9   2   7 156.411 12.1853   1
  -8   2   7 33.6206 7.68303   1
  -7   2   7 332.194 13.6877   1
  -6   2   7 118.577 8.34056   1
  -5   2   7 591.950 14.3415   1
  -4   2   7 94.9428 6.46827   1
  -3   2   7 23.2097 4.02797   1
  -2   2   7 1.94871 3.04692   1
  -1   2   7 1367.00 16.2567   1
   0   2   7 2675.64 26.4491   1
   1   2   7 44.8048 3.48121   1
   2   2   7 2.52765 3.40519   1
   3   2   7 14.4836 3.10341   1
   4   2   7 9.65458 4.08540   1
   5   2   7 27.1957 5.63383   1
   6   2   7 10.2978 6.48235   1
   7   2   6 190.621 68.1737  -2
   7   2   7 190.621 68.1737   1
   8   2   7 18.2858 7.77300   1
 -10   3   7 8.08852 9.07825   1
  -9   3   7 61.6178 9.23219   1
  -8   3   7 7.15398 5.84784   1
  -7   3   7 261.567 11.5486   1
  -6   3   7 449.904 12.7150   1
  -5   3   7 21.4141 4.07995   1
  -4   3   7 213.836 7.05129   1
  -3   3   7 20.0198 3.11710   1
  -2   3   7 90.0600 4.84359   1
  -1   3   7 207.390 5.77324   1
   0   3   7 4.31188 2.40833   1
   1   3   7 109.927 5.15006   1
   2   3   7 1.77018 2.72772   1
   3   3   7 167.133 7.26698   1
   4   3   7 279.297 9.95598   1
   5   3   7 167.297 9.56737   1
   6   3   7 93.3183 7.44452   1
   7   3   7 5.05071 6.91986   1
 -10   4   7 11.2688 8.75976   1
  -9   4   7 11.3767 6.89990   1
  -8   4   7 14.8043 6.47793   1
  -7   4   7 34.5351 6.42781   1
  -6   4   7 11.3405 4.84652   1
  -5   4   7 0.96230 3.54940   1
  -4   4   7 39.4887 4.06196   1
  -3   4   7 421.032 8.60051   1
  -2   4   7 165.078 5.90140   1
  -1   4   7 21.7115 2.95649   1
   0   4   7 116.631 4.88963   1
   1   4   7 108.248 4.80964   1
   2   4   7 111.077 5.86095   1
   3   4   7 422.431 10.5091   1
   4   4   7 146.492 8.05622   1
   5   4   7 6.27627 5.09410   1
   6   4   7 224.563 9.95784   1
   7   4   7 16.8089 7.83955   1
 -10   5   7 4.57029 7.79919   1
  -9   5   7 4.03498 5.74982   1
  -8   5   7 73.8603 7.16975   1
  -7   5   7 61.3855 6.39025   1
  -6   5   7 22.8194 5.02922   1
  -5   5   7 101.899 5.78347   1
  -4   5   7 72.9412 4.57917   1
  -3   5   7 245.637 7.28153   1
  -2   5   7 529.059 8.82493   1
  -1   5   7 198.222 6.35443   1
   0   5   7 83.8516 4.35420   1
   1   5   7 375.188 8.95958   1
   2   5   7 6.82425 3.84745   1
   3   5   7 329.710 9.57901   1
   4   5   7 12.1848 4.84858   1
   5   5   7 72.0388 6.78310   1
   6   5   7 108.788 8.89190   1
  -9   6   7 15.0157 6.66312   1
  -8   6   7 83.9486 7.17314   1
  -7   6   7 150.373 8.63141   1
  -6   6   7 14.3250 3.85524   1
  -5   6   7 21.3529 4.38532   1
  -4   6   7 161.589 6.82217   1
  -3   6   7 81.7707 5.13442   1
  -2   6   7 274.231 6.90588   1
  -1   6   7 78.2751 4.33267   1
   0   6   7 100.809 4.81146   1
   1   6   7 90.0268 5.55370   1
   2   6   7 74.0170 5.94026   1
   3   6   7 51.3511 5.86140   1
   4   6   7 8.81831 5.54577   1
   5   6   7 64.5005 7.22958   1
  -9   7   7 17.5470 5.53134   1
  -8   7   7 10.4245 4.88485   1
  -7   7   7 1.57927 5.12377   1
  -6   7   7 24.5904 5.28981   1
  -5   7   7 263.170 9.24201   1
  -4   7   7 492.074 10.4793   1
  -3   7   7 478.936 9.14426   1
  -2   7   7 73.8866 3.68816   1
  -1   7   7 81.6652 3.94388   1
   0   7   7 45.1211 3.65350   1
   1   7   7 13.6932 3.82856   1
   2   7   7 17.1597 5.11116   1
   3   7   7 77.5964 6.52279   1
   4   7   7 7.91541 5.34909   1
  -8   8   7 42.4848 6.69561   1
  -7   8   7 17.9575 5.59155   1
  -6   8   7 1.86353 4.69118   1
  -5   8   7 57.3891 5.24399   1
  -4   8   7 222.397 6.72652   1
  -3   8   7 11.1696 3.55443   1
  -2   8   7 10.8897 3.65341   1
  -1   8   7 33.7644 4.78572   1
   0   8   7 195.156 8.08993   1
   1   8   7 358.948 8.18973   1
   2   8   7 18.9743 4.37668   1
   3   8   7 -3.7575 5.36965   1
  -7   9   7 57.1881 6.79243   1
  -6   9   7 20.3791 4.51058   1
  -5   9   7 4.04244 4.73131   1
  -4   9   7 52.8562 5.06783   1
  -3   9   7 54.6109 6.93156   1
  -2   9   7 136.994 9.58543   1
  -1   9   7 102.739 8.47723   1
   0   9   7 30.8988 3.41547   1
   1   9   7 39.7400 6.32501   1
  -5  10   7 52.9402 5.25435   1
  -4  10   7 16.3624 6.51241   1
  -3  10   7 0.83758 6.48746   1
  -2  10   7 55.8653 7.67692   1
  -1  10   7 172.417 11.0166   1
   1 -11   9 2.69520 15.0487  -2
   1 -11   8 2.69520 15.0487   1
   2 -11   9 9.76705 11.9169  -2
   2 -11   8 9.76705 11.9169   1
   3 -11   9 8.01749 15.6216  -2
   3 -11   8 8.01749 15.6216   1
   4 -11   8 -130.07 82.7860  -2
   4 -11   8 -130.07 82.7860   1
   5 -11   8 -4.5256 14.1562  -2
   5 -11   8 -4.5256 14.1562   1
  -2 -10   8 -2.7814 5.81909   1
  -1 -10   9 43.7239 10.3031  -2
  -1 -10   8 43.7239 10.3031   1
   0 -10   9 101.433 11.7987  -2
   0 -10   8 101.433 11.7987   1
   1 -10   9 -15.733 9.85399  -2
   1 -10   8 -15.733 9.85399   1
   2 -10   9 18.1277 10.8373  -2
   2 -10   8 18.1277 10.8373   1
   3 -10   9 58.8026 24.8719  -2
   3 -10   8 58.8026 24.8719   1
   4 -10   8 161.125 19.0707  -2
   4 -10   8 161.125 19.0707   1
   5 -10   8 14.5704 7.71195  -2
   5 -10   8 14.5704 7.71195   1
   6 -10   8 -4.2759 9.62833  -2
   6 -10   8 -4.2759 9.62833   1
   7 -10   8 27.5968 11.3869  -2
   7 -10   8 27.5968 11.3869   1
  -3  -9   9 20.7160 20.9980  -2
  -3  -9   8 20.7160 20.9980   1
  -2  -9   9 46.1111 16.5574  -2
  -2  -9   8 46.1111 16.5574   1
  -1  -9   9 126.563 11.4463  -2
  -1  -9   8 126.563 11.4463   1
   0  -9   9 408.992 16.0438  -2
   0  -9   8 408.992 16.0438   1
   1  -9   9 225.153 13.1643  -2
   1  -9   8 225.153 13.1643   1
   2  -9   9 197.072 15.1036  -2
   2  -9   8 197.072 15.1036   1
   3  -9   8 -6.5605 23.2815  -2
   3  -9   8 -6.5605 23.2815   1
   4  -9   8 119.880 16.7058  -2
   4  -9   8 119.880 16.7058   1
   5  -9   8 722.467 22.3605  -2
   5  -9   8 722.467 22.3605   1
   6  -9   8 110.505 14.0628  -2
   6  -9   8 110.505 14.0628   1
   7  -9   8 24.7984 15.3209  -2
   7  -9   8 24.7984 15.3209   1
   8  -9   8 190.464 20.2658  -2
   8  -9   8 190.464 20.2658   1
  -4  -8   9 106.931 39.6738  -2
  -4  -8   8 106.931 39.6738   1
  -3  -8   9 2.17366 15.9997  -2
  -3  -8   8 2.17366 15.9997   1
  -2  -8   9 6.47048 11.7207  -2
  -2  -8   8 6.47048 11.7207   1
  -1  -8   9 61.3071 11.3806  -2
  -1  -8   8 61.3071 11.3806   1
   0  -8   9 190.749 13.7740  -2
   0  -8   8 190.749 13.7740   1
   1  -8   9 21.5202 13.6918  -2
   1  -8   8 21.5202 13.6918   1
   2  -8   8 45.8406 21.3488  -2
   2  -8   8 45.8406 21.3488   1
   3  -8   8 98.8851 13.8301  -2
   3  -8   8 98.8851 13.8301   1
   4  -8   8 32.7647 9.41756  -2
   4  -8   8 32.7647 9.41756   1
   5  -8   8 8.38996 9.61356  -2
   5  -8   8 8.38996 9.61356   1
   6  -8   8 115.106 11.1429  -2
   6  -8   8 115.106 11.1429   1
   7  -8   8 172.266 14.9226  -2
   7  -8   8 172.266 14.9226   1
   8  -8   8 63.1509 21.9606  -2
   8  -8   8 63.1509 21.9606   1
  -6  -7   8 2.52741 20.1239   1
  -5  -7   8 37.4036 7.17209   1
  -4  -7   9 26.5503 22.3523  -2
  -4  -7   8 26.5503 22.3523   1
  -3  -7   9 1.89892 13.7707  -2
  -3  -7   8 1.89892 13.7707   1
  -2  -7   9 25.1495 12.2802  -2
  -2  -7   8 25.1495 12.2802   1
  -1  -7   9 13.6948 11.6706  -2
  -1  -7   8 13.6948 11.6706   1
   0  -7   9 282.016 14.8453  -2
   0  -7   8 282.016 14.8453   1
   1  -7   9 393.990 47.0286  -2
   1  -7   8 393.990 47.0286   1
   2  -7   8 -3.2228 19.0625  -2
   2  -7   8 -3.2228 19.0625   1
   3  -7   8 -6.3094 9.22917  -2
   3  -7   8 -6.3094 9.22917   1
   4  -7   8 36.7165 6.98310  -2
   4  -7   8 36.7165 6.98310   1
   5  -7   8 616.877 16.2731  -2
   5  -7   8 616.877 16.2731   1
   6  -7   8 58.7648 11.2347  -2
   6  -7   8 58.7648 11.2347   1
   7  -7   8 24.1269 15.3816  -2
   7  -7   8 24.1269 15.3816   1
   8  -7   8 93.1575 24.2570  -2
   8  -7   8 93.1575 24.2570   1
   8  -7   7 109.757 67.0236  -2
   8  -7   8 109.757 67.0236   1
   9  -7   7 94.1110 27.5259  -2
   9  -7   8 94.1110 27.5259   1
  -6  -6   8 8.83899 6.73737   1
  -5  -6   9 397.788 100.663  -2
  -5  -6   8 397.788 100.663   1
  -4  -6   9 167.356 19.5658  -2
  -4  -6   8 167.356 19.5658   1
  -3  -6   9 99.8477 13.5585  -2
  -3  -6   8 99.8477 13.5585   1
  -2  -6   9 34.3765 7.91560  -2
  -2  -6   8 34.3765 7.91560   1
  -1  -6   9 96.4530 9.49415  -2
  -1  -6   8 96.4530 9.49415   1
   0  -6   9 -8.4566 11.5869  -2
   0  -6   8 -8.4566 11.5869   1
   1  -6   8 324.915 42.1697  -2
   1  -6   8 324.915 42.1697   1
   2  -6   8 29.4148 9.67134  -2
   2  -6   8 29.4148 9.67134   1
   3  -6   8 34.1622 6.12545  -2
   3  -6   8 34.1622 6.12545   1
   4  -6   8 103.460 8.72643  -2
   4  -6   8 103.460 8.72643   1
   5  -6   8 20.4284 9.29933  -2
   5  -6   8 20.4284 9.29933   1
   6  -6   8 359.678 17.8614  -2
   6  -6   8 359.678 17.8614   1
   7  -6   8 22.8293 23.8619  -2
   7  -6   8 22.8293 23.8619   1
   8  -6   7 0.22524 34.1398  -2
   8  -6   8 0.22524 34.1398   1
   8  -6   8 14.2581 43.3008  -2
   8  -6   8 14.2581 43.3008   1
   9  -6   7 87.3218 10.6647  -2
   9  -6   8 87.3218 10.6647   1
  -7  -5  10 59.1762 60.7895  -2
  -7  -5   8 59.1762 60.7895   1
  -6  -5   8 36.7737 7.59242   1
  -5  -5   9 141.554 39.3793  -2
  -5  -5   8 141.554 39.3793   1
  -4  -5   9 102.138 18.8986  -2
  -4  -5   8 102.138 18.8986   1
  -3  -5   9 564.950 19.4251  -2
  -3  -5   8 564.950 19.4251   1
  -2  -5   9 13.6522 11.2649  -2
  -2  -5   8 13.6522 11.2649   1
  -1  -5   9 144.904 40.9738  -2
  -1  -5   8 144.904 40.9738   1
   0  -5   8 39.6120 4.28227   1
   1  -5   8 14.4231 15.0547  -2
   1  -5   8 14.4231 15.0547   1
   2  -5   8 64.9705 10.1978  -2
   2  -5   8 64.9705 10.1978   1
   3  -5   8 47.0417 9.82108  -2
   3  -5   8 47.0417 9.82108   1
   4  -5   8 57.4255 9.76648  -2
   4  -5   8 57.4255 9.76648   1
   5  -5   8 124.541 15.7812  -2
   5  -5   8 124.541 15.7812   1
   6  -5   8 27.8953 17.9872  -2
   6  -5   8 27.8953 17.9872   1
   7  -5   7 268.313 36.8929  -2
   7  -5   8 268.313 36.8929   1
   7  -5   8 -13.141 32.6936  -2
   7  -5   8 -13.141 32.6936   1
   8  -5   7 32.0711 19.0099  -2
   8  -5   8 32.0711 19.0099   1
   9  -5   7 268.344 23.5110  -2
   9  -5   8 268.344 23.5110   1
  -8  -4   8 -6.2007 8.27318   1
  -7  -4   8 8.11888 4.51783   1
  -6  -4   8 171.125 9.58449   1
  -5  -4   9 139.051 30.7060  -2
  -5  -4   8 139.051 30.7060   1
  -4  -4   9 14.5652 14.8699  -2
  -4  -4   8 14.5652 14.8699   1
  -3  -4   9 40.7462 20.0301  -2
  -3  -4   8 40.7462 20.0301   1
  -2  -4   8 9.90852 3.58305   1
  -1  -4   8 188.565 6.60415   1
   0  -4   8 35.6217 3.11089   1
   1  -4   8 1250.89 45.8394  -2
   1  -4   8 1250.89 45.8394   1
   2  -4   8 33.2075 12.4961  -2
   2  -4   8 33.2075 12.4961   1
   3  -4   8 238.666 14.9221  -2
   3  -4   8 238.666 14.9221   1
   4  -4   8 260.598 34.3697  -2
   4  -4   8 260.598 34.3697   1
   5  -4   8 33.2126 36.1689  -2
   5  -4   8 33.2126 36.1689   1
   6  -4   7 139.255 56.6657  -2
   6  -4   8 139.255 56.6657   1
   7  -4   7 175.622 28.2024  -2
   7  -4   8 175.622 28.2024   1
   8  -4   7 54.1605 18.5925  -2
   8  -4   8 54.1605 18.5925   1
   9  -4   7 49.7891 18.6960  -2
   9  -4   8 49.7891 18.6960   1
  -8  -3   8 7.53875 5.38746   1
  -7  -3   8 47.6257 7.62617   1
  -6  -3   8 85.8868 7.61206   1
  -5  -3   9 124.762 42.7133  -2
  -5  -3   8 124.762 42.7133   1
  -4  -3   9 520.562 38.6015  -2
  -4  -3   8 520.562 38.6015   1
  -3  -3   8 10.8861 3.96080   1
  -2  -3   8 1177.02 16.2564   1
  -1  -3   8 54.0325 4.67147   1
   0  -3   8 70.7240 5.38225   1
   1  -3   8 1943.91 55.8296  -2
   1  -3   8 1943.91 55.8296   1
   2  -3   8 817.386 41.1339  -2
   2  -3   8 817.386 41.1339   1
   3  -3   8 13.7056 23.8351  -2
   3  -3   8 13.7056 23.8351   1
   4  -3   8 -0.2125 3.36625   1
   5  -3   8 118.479 7.24940   1
   6  -3   7 52.9468 51.0481  -2
   6  -3   8 52.9468 51.0481   1
   7  -3   7 131.891 19.9200  -2
   7  -3   8 131.891 19.9200   1
   8  -3   7 255.470 26.1981  -2
   8  -3   8 255.470 26.1981   1
   9  -3   7 90.9209 11.3457  -2
   9  -3   8 90.9209 11.3457   1
  -9  -2   8 40.3472 9.65441   1
  -8  -2   8 0.45130 7.13393   1
  -7  -2   8 59.8970 8.22159   1
  -6  -2   8 2.08126 3.96879   1
  -5  -2   8 234.775 10.5410   1
  -4  -2   8 257.091 9.77438   1
  -3  -2   8 225.747 9.26377   1
  -2  -2   8 1.44376 3.69182   1
  -1  -2   8 5.31214 3.60873   1
   0  -2   8 76.6941 5.17241   1
   1  -2   8 307.764 8.26863   1
   2  -2   8 392.411 8.85691   1
   3  -2   8 185.379 8.11047   1
   4  -2   8 319.331 9.10966   1
   5  -2   8 13.4476 4.09684   1
   6  -2   8 146.470 7.31696   1
   7  -2   7 13.8035 18.0863  -2
   7  -2   8 13.8035 18.0863   1
   8  -2   7 383.336 32.2197  -2
   8  -2   8 383.336 32.2197   1
   9  -2   7 191.837 41.4958  -2
   9  -2   8 191.837 41.4958   1
  -9  -1   8 14.3550 8.22159   1
  -8  -1   8 -2.8344 6.44939   1
  -7  -1   8 29.2425 5.71526   1
  -6  -1   8 1.38310 4.45172   1
  -5  -1   8 6.96887 4.11679   1
  -4  -1   8 -0.7652 3.87055   1
  -3  -1   8 57.0953 6.05173   1
  -2  -1   8 185.244 7.11868   1
  -1  -1   8 750.682 12.1625   1
   0  -1   8 355.462 7.70868   1
   1  -1   8 429.988 9.90132   1
   2  -1   8 177.146 6.69655   1
   3  -1   8 34.8460 4.73914   1
   4  -1   8 52.6134 4.71843   1
   5  -1   8 61.9951 6.18809   1
   6  -1   8 61.9799 5.79968   1
   7  -1   7 135.859 31.0366  -2
   7  -1   8 135.859 31.0366   1
   8  -1   7 43.9949 29.4524  -2
   8  -1   8 43.9949 29.4524   1
   9  -1   7 55.6911 45.3975  -2
   9  -1   8 55.6911 45.3975   1
  -9   0   8 384.589 17.0466   1
  -8   0   8 9.32046 7.72268   1
  -7   0   8 54.1290 7.05972   1
  -6   0   8 190.472 10.5988   1
  -5   0   8 59.3125 5.93606   1
  -4   0   8 317.968 9.28847   1
  -3   0   8 213.056 9.01701   1
  -2   0   8 515.911 10.9778   1
  -1   0   8 880.020 12.3506   1
   0   0   8 114.021 5.22914   1
   1   0   8 271.795 8.05959   1
   2   0   8 287.722 7.25017   1
   3   0   8 412.424 9.68077   1
   4   0   8 64.1352 5.35954   1
   5   0   8 30.3814 5.19660   1
   6   0   7 586.062 71.6103  -2
   6   0   8 586.062 71.6103   1
   7   0   7 -20.769 46.0515  -2
   7   0   8 -20.769 46.0515   1
   8   0   7 31.8102 49.3616  -2
   8   0   8 31.8102 49.3616   1
   9   0   7 -12.852 55.2159  -2
   9   0   8 -12.852 55.2159   1
 -10   1   8 41.1681 12.7632   1
  -9   1   8 283.297 14.9659   1
  -8   1   8 23.4024 8.01279   1
  -7   1   8 54.7535 8.36289   1
  -6   1   8 244.616 12.1340   1
  -5   1   8 17.8871 4.38711   1
  -4   1   8 909.477 14.1297   1
  -3   1   8 393.144 9.94387   1
  -2   1   8 84.4240 6.25936   1
  -1   1   8 6.51293 2.72964   1
   0   1   8 1104.88 14.1090   1
   1   1   8 137.665 6.49825   1
   2   1   8 984.404 14.2376   1
   3   1   8 58.2453 5.11490   1
   4   1   8 3.58125 4.23620   1
   5   1   8 53.8130 6.35253   1
   6   1   7 410.638 71.2349  -2
   6   1   8 410.638 71.2349   1
   7   1   7 6.57763 68.0266  -2
   7   1   8 6.57763 68.0266   1
   8   1   8 6.80587 7.09373   1
 -10   2   8 9.65511 9.64822   1
  -9   2   8 39.4246 7.68696   1
  -8   2   8 48.0951 8.83648   1
  -7   2   8 295.461 12.8144   1
  -6   2   8 375.821 11.6434   1
  -5   2   8 13.1224 4.39204   1
  -4   2   8 93.6462 4.91477   1
  -3   2   8 233.224 7.95221   1
  -2   2   8 785.261 12.1651   1
  -1   2   8 196.616 6.32110   1
   0   2   8 2.21071 3.16179   1
   1   2   8 50.8954 4.03047   1
   2   2   8 232.763 6.21776   1
   3   2   8 646.126 11.3469   1
   4   2   8 84.0177 5.24224   1
   5   2   8 8.30941 5.78443   1
   6   2   8 38.1643 8.21055   1
   7   2   8 18.0015 6.58693   1
   8   2   8 145.186 11.1882   1
 -10   3   8 76.8338 10.9087   1
  -9   3   8 119.501 9.90603   1
  -8   3   8 0.07498 6.41524   1
  -7   3   8 21.8205 6.20091   1
  -6   3   8 62.8547 6.61555   1
  -5   3   8 270.499 9.54684   1
  -4   3   8 -3.2420 2.40593   1
  -3   3   8 8.47589 2.93209   1
  -2   3   8 332.316 7.87201   1
  -1   3   8 108.634 5.32453   1
   0   3   8 50.5089 3.57471   1
   1   3   8 2.84253 2.79920   1
   2   3   8 113.847 5.89821   1
   3   3   8 56.0632 4.69931   1
   4   3   8 30.5439 4.58430   1
   5   3   8 4.07794 4.90471   1
   6   3   8 122.402 9.16241   1
   7   3   8 9.83037 6.36741   1
 -10   4   8 41.9918 9.21117   1
  -9   4   8 56.2020 7.92978   1
  -8   4   8 7.50944 6.68811   1
  -7   4   8 57.0133 6.89256   1
  -6   4   8 -1.9889 4.47195   1
  -5   4   8 29.8342 4.56771   1
  -4   4   8 255.149 8.56281   1
  -3   4   8 19.8755 3.05578   1
  -2   4   8 9.60426 2.63101   1
  -1   4   8 12.2863 2.37917   1
   0   4   8 2.10023 2.30337   1
   1   4   8 16.4621 3.31158   1
   2   4   8 11.8651 3.47917   1
   3   4   8 63.6529 5.26594   1
   4   4   8 9.54837 5.09117   1
   5   4   8 93.5323 8.49658   1
   6   4   8 18.3737 6.50529   1
   7   4   8 12.5775 10.4234   1
  -9   5   8 30.2725 7.07288   1
  -8   5   8 15.8326 5.65179   1
  -7   5   8 151.930 8.79721   1
  -6   5   8 106.232 7.62438   1
  -5   5   8 8.38686 3.72510   1
  -4   5   8 24.4191 3.64078   1
  -3   5   8 16.3639 3.66061   1
  -2   5   8 108.437 4.50265   1
  -1   5   8 64.4212 4.13642   1
   0   5   8 14.3167 3.12527   1
   1   5   8 42.3868 4.61209   1
   2   5   8 15.9780 4.12381   1
   3   5   8 4.33229 3.90518   1
   4   5   8 2.74275 4.96844   1
   5   5   8 16.8915 5.47192   1
   6   5   8 -7.1649 5.90233   1
  -9   6   8 167.675 10.0056   1
  -8   6   8 313.965 13.0391   1
  -7   6   8 125.287 8.15701   1
  -6   6   8 5.32092 3.85216   1
  -5   6   8 68.7377 6.01162   1
  -4   6   8 108.864 6.13230   1
  -3   6   8 22.8998 4.32900   1
  -2   6   8 154.498 5.89668   1
  -1   6   8 147.948 5.98298   1
   0   6   8 6.78248 3.48528   1
   1   6   8 39.6397 4.48282   1
   2   6   8 33.0760 5.02532   1
   3   6   8 -4.9747 5.06593   1
   4   6   8 33.4598 6.12159   1
   5   6   8 78.5813 7.94866   1
  -9   7   8 16.5200 5.90824   1
  -8   7   8 3.25864 4.62083   1
  -7   7   8 10.3963 5.12568   1
  -6   7   8 16.7129 5.11065   1
  -5   7   8 393.073 11.0849   1
  -4   7   8 11.6695 4.07816   1
  -3   7   8 138.874 6.33669   1
  -2   7   8 4.90827 3.23263   1
  -1   7   8 491.782 10.0890   1
   0   7   8 16.2220 3.72532   1
   1   7   8 144.405 7.60397   1
   2   7   8 42.9915 6.02824   1
   3   7   8 65.5090 6.27098   1
   4   7   8 -4.2059 5.67573   1
  -8   8   8 21.9853 6.54666   1
  -7   8   8 8.60661 5.51174   1
  -6   8   8 2.84086 4.64511   1
  -5   8   8 80.4749 5.69806   1
  -4   8   8 22.1049 3.79811   1
  -3   8   8 29.3260 4.22499   1
  -2   8   8 3.80071 4.03732   1
  -1   8   8 5.87895 3.88421   1
   0   8   8 5.61579 4.91803   1
   1   8   8 62.6870 5.30481   1
   2   8   8 0.88812 4.39668   1
   3   8   8 34.3928 6.38783   1
  -7   9   8 3.18127 5.99137   1
  -6   9   8 -1.6110 4.54906   1
  -5   9   8 15.8370 5.12161   1
  -4   9   8 0.96621 4.58046   1
  -3   9   8 22.0963 4.34970   1
  -2   9   8 -0.4545 4.40941   1
  -1   9   8 4.15023 4.51779   1
   0   9   8 14.9878 4.31492   1
   1   9   8 11.0917 5.79883   1
  -5  10   8 13.3118 6.15542   1
  -4  10   8 48.9512 9.95441   1
  -3  10   8 11.7039 7.16281   1
  -2  10   8 36.0083 7.58562   1
   1 -11   9 3.59196 5.27526   1
   2 -11  10 11.6414 11.2333  -2
   2 -11   9 11.6414 11.2333   1
   3 -11  10 48.1955 16.6782  -2
   3 -11   9 48.1955 16.6782   1
   4 -11   9 73.8852 85.7342  -2
   4 -11   9 73.8852 85.7342   1
  -1 -10  10 11.6612 14.7568  -2
  -1 -10   9 11.6612 14.7568   1
   0 -10  10 58.4620 15.1797  -2
   0 -10   9 58.4620 15.1797   1
   1 -10  10 16.0761 12.9260  -2
   1 -10   9 16.0761 12.9260   1
   2 -10  10 4.58864 13.6363  -2
   2 -10   9 4.58864 13.6363   1
   3 -10  10 82.5197 22.5006  -2
   3 -10   9 82.5197 22.5006   1
   4 -10   9 419.383 21.4278  -2
   4 -10   9 419.383 21.4278   1
   5 -10   9 14.6688 15.6996  -2
   5 -10   9 14.6688 15.6996   1
   6 -10   9 104.004 12.0138  -2
   6 -10   9 104.004 12.0138   1
  -3  -9  10 -28.600 25.0579  -2
  -3  -9   9 -28.600 25.0579   1
  -2  -9  10 78.8879 17.4290  -2
  -2  -9   9 78.8879 17.4290   1
  -1  -9  10 111.839 15.4951  -2
  -1  -9   9 111.839 15.4951   1
   0  -9  10 236.189 16.0582  -2
   0  -9   9 236.189 16.0582   1
   1  -9  10 152.731 16.6062  -2
   1  -9   9 152.731 16.6062   1
   2  -9  10 179.331 18.9482  -2
   2  -9   9 179.331 18.9482   1
   3  -9   9 117.403 18.2516  -2
   3  -9   9 117.403 18.2516   1
   4  -9   9 19.7972 12.7122  -2
   4  -9   9 19.7972 12.7122   1
   5  -9   9 455.352 19.9343  -2
   5  -9   9 455.352 19.9343   1
   6  -9   9 12.3043 11.6884  -2
   6  -9   9 12.3043 11.6884   1
   7  -9   9 10.3169 15.1194  -2
   7  -9   9 10.3169 15.1194   1
  -4  -8  10 140.952 75.9849  -2
  -4  -8   9 140.952 75.9849   1
  -3  -8  10 84.8339 17.3845  -2
  -3  -8   9 84.8339 17.3845   1
  -2  -8  10 5.63483 12.3445  -2
  -2  -8   9 5.63483 12.3445   1
  -1  -8  10 25.3163 12.6627  -2
  -1  -8   9 25.3163 12.6627   1
   0  -8  10 383.067 15.7498  -2
   0  -8   9 383.067 15.7498   1
   1  -8  10 85.1884 13.3581  -2
   1  -8   9 85.1884 13.3581   1
   2  -8   9 252.447 81.3084  -2
   2  -8   9 252.447 81.3084   1
   3  -8   9 27.3229 11.2658  -2
   3  -8   9 27.3229 11.2658   1
   4  -8   9 4.59892 11.9732  -2
   4  -8   9 4.59892 11.9732   1
   5  -8   9 10.6891 10.1574  -2
   5  -8   9 10.6891 10.1574   1
   6  -8   9 24.9668 11.5819  -2
   6  -8   9 24.9668 11.5819   1
   7  -8   9 170.942 15.5088  -2
   7  -8   9 170.942 15.5088   1
   8  -8   9 138.752 21.5457  -2
   8  -8   9 138.752 21.5457   1
  -5  -7   9 176.575 10.4670   1
  -4  -7  10 -2.7718 45.7019  -2
  -4  -7   9 -2.7718 45.7019   1
  -3  -7  10 214.905 16.8264  -2
  -3  -7   9 214.905 16.8264   1
  -2  -7  10 37.2339 10.2273  -2
  -2  -7   9 37.2339 10.2273   1
  -1  -7  10 252.694 13.8625  -2
  -1  -7   9 252.694 13.8625   1
   0  -7  10 18.9276 12.9950  -2
   0  -7   9 18.9276 12.9950   1
   1  -7   9 155.928 7.70151   1
   2  -7   9 372.115 36.3562  -2
   2  -7   9 372.115 36.3562   1
   3  -7   9 269.905 14.7906  -2
   3  -7   9 269.905 14.7906   1
   4  -7   9 410.288 13.4023  -2
   4  -7   9 410.288 13.4023   1
   5  -7   9 304.474 12.8039  -2
   5  -7   9 304.474 12.8039   1
   6  -7   9 23.3093 11.7947  -2
   6  -7   9 23.3093 11.7947   1
   7  -7   9 53.0665 22.4590  -2
   7  -7   9 53.0665 22.4590   1
   8  -7   9 30.6995 28.1644  -2
   8  -7   9 30.6995 28.1644   1
   8  -7   8 105.875 70.2032  -2
   8  -7   9 105.875 70.2032   1
   9  -7   8 -10.253 55.1385  -2
   9  -7   9 -10.253 55.1385   1
  -6  -6   9 8.23011 6.79138   1
  -5  -6   9 279.164 13.1552   1
  -4  -6  10 108.201 27.4224  -2
  -4  -6   9 108.201 27.4224   1
  -3  -6  10 75.9617 13.6860  -2
  -3  -6   9 75.9617 13.6860   1
  -2  -6  10 180.621 11.7569  -2
  -2  -6   9 180.621 11.7569   1
  -1  -6  10 54.1473 11.5479  -2
  -1  -6   9 54.1473 11.5479   1
   0  -6   9 4.34177 3.43950   1
   1  -6   9 480.882 9.98805   1
   2  -6   9 -6.0172 11.7011  -2
   2  -6   9 -6.0172 11.7011   1
   3  -6   9 268.168 12.8697  -2
   3  -6   9 268.168 12.8697   1
   4  -6   9 20.6575 8.88098  -2
   4  -6   9 20.6575 8.88098   1
   5  -6   9 73.5933 11.9254  -2
   5  -6   9 73.5933 11.9254   1
   6  -6   9 57.4446 15.6065  -2
   6  -6   9 57.4446 15.6065   1
   7  -6   9 201.590 29.7002  -2
   7  -6   9 201.590 29.7002   1
   8  -6   8 -7.6728 25.3631  -2
   8  -6   9 -7.6728 25.3631   1
   8  -6   9 -27.975 56.1181  -2
   8  -6   9 -27.975 56.1181   1
   9  -6   8 47.6831 23.0621  -2
   9  -6   9 47.6831 23.0621   1
  -7  -5   9 7.43346 7.27364   1
  -6  -5   9 146.610 11.0075   1
  -5  -5  10 193.745 50.0882  -2
  -5  -5   9 193.745 50.0882   1
  -4  -5  10 26.1821 23.2203  -2
  -4  -5   9 26.1821 23.2203   1
  -3  -5  10 142.753 14.0948  -2
  -3  -5   9 142.753 14.0948   1
  -2  -5  10 178.178 37.1429  -2
  -2  -5   9 178.178 37.1429   1
  -1  -5   9 136.873 6.12546   1
   0  -5   9 496.152 10.7378   1
   1  -5   9 1.78907 2.95045   1
   2  -5   9 180.555 20.5151  -2
   2  -5   9 180.555 20.5151   1
   3  -5   9 45.2027 12.4961  -2
   3  -5   9 45.2027 12.4961   1
   4  -5   9 23.3782 10.0860  -2
   4  -5   9 23.3782 10.0860   1
   5  -5   9 45.2390 14.8622  -2
   5  -5   9 45.2390 14.8622   1
   6  -5   9 1156.61 88.9502  -2
   6  -5   9 1156.61 88.9502   1
   7  -5   8 90.2883 60.6427  -2
   7  -5   9 90.2883 60.6427   1
   8  -5   8 76.6597 24.4015  -2
   8  -5   9 76.6597 24.4015   1
   9  -5   8 112.507 19.7852  -2
   9  -5   9 112.507 19.7852   1
  -8  -4   9 -1.3224 4.38149   1
  -7  -4   9 46.6973 6.56585   1
  -6  -4   9 252.377 11.4166   1
  -5  -4  10 186.007 44.0854  -2
  -5  -4   9 186.007 44.0854   1
  -4  -4  10 1.70297 24.1902  -2
  -4  -4   9 1.70297 24.1902   1
  -3  -4   9 6.44133 4.21165   1
  -2  -4   9 77.1702 5.27955   1
  -1  -4   9 957.423 14.4337   1
   0  -4   9 144.207 5.83494   1
   1  -4   9 56.5104 41.8045  -2
   1  -4   9 56.5104 41.8045   1
   2  -4   9 83.7117 22.2290  -2
   2  -4   9 83.7117 22.2290   1
   3  -4   9 95.8765 17.6905  -2
   3  -4   9 95.8765 17.6905   1
   4  -4   9 51.0813 28.3936  -2
   4  -4   9 51.0813 28.3936   1
   5  -4   9 10.4115 4.21611   1
   6  -4   9 192.698 8.98375   1
   7  -4   8 143.923 74.1593  -2
   7  -4   9 143.923 74.1593   1
   8  -4   8 0.77068 35.7754  -2
   8  -4   9 0.77068 35.7754   1
   9  -4   8 -3.6077 24.8530  -2
   9  -4   9 -3.6077 24.8530   1
  -8  -3   9 18.9477 6.93380   1
  -7  -3   9 -8.9772 5.88859   1
  -6  -3   9 138.154 9.46650   1
  -5  -3   9 165.569 9.51990   1
  -4  -3  10 574.611 70.6172  -2
  -4  -3   9 574.611 70.6172   1
  -3  -3   9 389.026 11.5326   1
  -2  -3   9 68.1753 5.28326   1
  -1  -3   9 323.009 8.91527   1
   0  -3   9 266.686 8.00029   1
   1  -3   9 -47.336 35.1393  -2
   1  -3   9 -47.336 35.1393   1
   2  -3   9 425.694 49.6550  -2
   2  -3   9 425.694 49.6550   1
   3  -3   9 532.816 56.3932  -2
   3  -3   9 532.816 56.3932   1
   4  -3   9 390.537 11.1773   1
   5  -3   9 52.7228 6.17249   1
   6  -3   9 69.6417 6.40347   1
   7  -3   8 205.402 33.2879  -2
   7  -3   9 205.402 33.2879   1
   8  -3   8 231.874 29.5294  -2
   8  -3   9 231.874 29.5294   1
   9  -3   8 -56.742 33.4622  -2
   9  -3   9 -56.742 33.4622   1
  -9  -2   9 48.8402 9.78468   1
  -8  -2   9 70.8628 9.39655   1
  -7  -2   9 20.3388 6.19155   1
  -6  -2   9 20.9207 5.29668   1
  -5  -2   9 55.8035 6.48797   1
  -4  -2   9 278.608 10.4634   1
  -3  -2   9 83.1921 6.70944   1
  -2  -2   9 156.957 7.45407   1
  -1  -2   9 242.190 8.20745   1
   0  -2   9 22.7241 4.14282   1
   1  -2   9 75.8465 5.11864   1
   2  -2   9 487.599 10.0733   1
   3  -2   9 -4.7228 3.22948   1
   4  -2   9 44.0047 5.15083   1
   5  -2   9 113.313 7.18461   1
   6  -2   9 294.931 12.2345   1
   7  -2   8 150.751 50.7416  -2
   7  -2   9 150.751 50.7416   1
   8  -2   8 532.448 43.7658  -2
   8  -2   9 532.448 43.7658   1
   9  -2   8 49.4677 34.5124  -2
   9  -2   9 49.4677 34.5124   1
  -9  -1   9 14.9794 8.29230   1
  -8  -1   9 27.6451 6.92188   1
  -7  -1   9 63.5609 6.88317   1
  -6  -1   9 80.5064 7.60011   1
  -5  -1   9 -4.0036 3.95993   1
  -4  -1   9 138.451 7.97622   1
  -3  -1   9 69.3534 6.42302   1
  -2  -1   9 12.5040 3.66773   1
  -1  -1   9 12.9993 3.54502   1
   0  -1   9 304.257 7.56186   1
   1  -1   9 522.427 10.7321   1
   2  -1   9 7.21107 2.81178   1
   3  -1   9 264.759 8.88932   1
   4  -1   9 5.90001 3.46557   1
   5  -1   9 147.810 7.66711   1
   6  -1   9 2.38852 4.88214   1
   7  -1   8 268.849 88.5884  -2
   7  -1   9 268.849 88.5884   1
   8  -1   8 -40.756 36.1734  -2
   8  -1   9 -40.756 36.1734   1
   9  -1   8 0.62750 55.7190  -2
   9  -1   9 0.62750 55.7190   1
  -9   0   9 42.9390 9.06988   1
  -8   0   9 12.3290 6.39880   1
  -7   0   9 62.6905 6.21963   1
  -6   0   9 168.742 9.56409   1
  -5   0   9 320.693 10.8565   1
  -4   0   9 237.665 9.16429   1
  -3   0   9 29.4723 4.57042   1
  -2   0   9 127.720 5.21074   1
  -1   0   9 225.493 7.77460   1
   0   0   9 259.468 7.31513   1
   1   0   9 205.852 7.45616   1
   2   0   9 1516.46 19.7955   1
   3   0   9 2.76692 3.43371   1
   4   0   9 120.318 6.91798   1
   5   0   9 74.4700 6.95852   1
   6   0   8 331.161 65.8870  -2
   6   0   9 331.161 65.8870   1
   7   0   8 323.667 90.5459  -2
   7   0   9 323.667 90.5459   1
   8   0   8 12.7395 60.9589  -2
   8   0   9 12.7395 60.9589   1
  -9   1   9 29.0784 8.32335   1
  -8   1   9 76.8775 9.59261   1
  -7   1   9 133.999 10.2642   1
  -6   1   9 74.0582 7.66588   1
  -5   1   9 147.300 7.10859   1
  -4   1   9 6.13734 3.54387   1
  -3   1   9 65.0191 5.40556   1
  -2   1   9 66.8095 5.29129   1
  -1   1   9 1193.65 16.8874   1
   0   1   9 137.466 5.79724   1
   1   1   9 23.5203 3.96665   1
   2   1   9 1021.91 15.1334   1
   3   1   9 179.360 7.61902   1
   4   1   9 87.3373 6.48690   1
   5   1   9 19.4471 5.23661   1
   6   1   9 86.8366 8.26836   1
   7   1   9 188.120 11.8712   1
   8   1   9 100.498 9.85501   1
  -9   2   9 56.8986 8.69125   1
  -8   2   9 37.0083 7.43524   1
  -7   2   9 13.0332 6.10926   1
  -6   2   9 850.962 19.4111   1
  -5   2   9 85.6663 7.03589   1
  -4   2   9 139.013 6.16433   1
  -3   2   9 111.657 6.18586   1
  -2   2   9 321.487 8.07922   1
  -1   2   9 402.916 8.74921   1
   0   2   9 732.908 12.0342   1
   1   2   9 9.83619 3.34231   1
   2   2   9 176.054 5.81046   1
   3   2   9 22.7974 3.18650   1
   4   2   9 35.5522 4.29962   1
   5   2   9 11.6499 4.69766   1
   6   2   9 110.692 9.74219   1
   7   2   9 128.240 10.4162   1
  -9   3   9 11.6830 7.24055   1
  -8   3   9 -4.2261 6.17690   1
  -7   3   9 76.1963 7.92241   1
  -6   3   9 86.1598 6.90886   1
  -5   3   9 244.559 8.57568   1
  -4   3   9 340.261 10.1767   1
  -3   3   9 26.0074 3.82236   1
  -2   3   9 75.4811 4.49185   1
  -1   3   9 32.1718 3.75038   1
   0   3   9 289.669 6.93953   1
   1   3   9 2.77895 3.04395   1
   2   3   9 47.4139 4.35669   1
   3   3   9 156.262 8.17062   1
   4   3   9 272.737 9.61157   1
   5   3   9 296.308 12.9097   1
   6   3   9 60.9765 7.97208   1
   7   3   9 23.6031 7.86489   1
  -9   4   9 26.6376 7.21255   1
  -8   4   9 49.3405 7.44134   1
  -7   4   9 34.9528 6.42204   1
  -6   4   9 2.14360 4.88411   1
  -5   4   9 155.037 7.62754   1
  -4   4   9 -0.4503 3.55553   1
  -3   4   9 222.068 7.07925   1
  -2   4   9 18.2784 3.14130   1
  -1   4   9 14.7705 2.91452   1
   0   4   9 7.46299 2.70714   1
   1   4   9 10.2740 3.14118   1
   2   4   9 13.4318 3.91923   1
   3   4   9 197.983 9.27330   1
   4   4   9 63.1530 6.44856   1
   5   4   9 7.98372 5.79530   1
   6   4   9 -3.0655 6.04865   1
  -9   5   9 79.1716 8.46350   1
  -8   5   9 278.949 13.0483   1
  -7   5   9 110.722 9.38312   1
  -6   5   9 9.88054 4.31254   1
  -5   5   9 7.39345 3.83922   1
  -4   5   9 137.232 6.29878   1
  -3   5   9 249.145 8.07383   1
  -2   5   9 123.379 4.45280   1
  -1   5   9 27.2290 3.59207   1
   0   5   9 -4.4096 2.89640   1
   1   5   9 104.151 6.49500   1
   2   5   9 9.63003 4.18603   1
   3   5   9 83.6177 5.89827   1
   4   5   9 19.9227 5.68288   1
   5   5   9 63.8228 7.17508   1
  -9   6   9 9.92183 6.23899   1
  -8   6   9 11.8661 6.05958   1
  -7   6   9 80.5435 7.36060   1
  -6   6   9 120.864 7.22279   1
  -5   6   9 546.241 12.4488   1
  -4   6   9 25.3141 4.33640   1
  -3   6   9 93.3732 5.89605   1
  -2   6   9 16.3870 3.33972   1
  -1   6   9 1.08798 3.18815   1
   0   6   9 67.1373 5.40774   1
   1   6   9 11.2767 3.86746   1
   2   6   9 7.38702 5.07756   1
   3   6   9 186.299 10.3075   1
   4   6   9 17.6218 6.22549   1
   5   6   9 13.4267 7.33343   1
  -8   7   9 58.6531 6.41265   1
  -7   7   9 6.28400 5.19775   1
  -6   7   9 17.2635 4.86485   1
  -5   7   9 -2.1098 4.21268   1
  -4   7   9 155.848 7.69761   1
  -3   7   9 128.184 6.45828   1
  -2   7   9 261.496 7.48656   1
  -1   7   9 33.9131 3.91845   1
   0   7   9 14.1990 4.01830   1
   1   7   9 36.3558 4.80579   1
   2   7   9 55.4254 6.47033   1
   3   7   9 49.4739 7.03276   1
  -8   8   9 26.3104 7.58266   1
  -7   8   9 23.7348 5.43942   1
  -6   8   9 4.69734 4.94348   1
  -5   8   9 18.5316 4.64634   1
  -4   8   9 57.2429 5.37499   1
  -3   8   9 249.159 7.25618   1
  -2   8   9 64.6976 5.69321   1
  -1   8   9 8.85275 4.09718   1
   0   8   9 5.52419 2.88112   1
   1   8   9 5.71362 4.78507   1
   2   8   9 17.7967 5.20011   1
  -6   9   9 -3.0835 5.10515   1
  -5   9   9 6.18999 3.92343   1
  -4   9   9 0.67981 4.43166   1
  -3   9   9 22.8862 4.84555   1
  -2   9   9 20.3703 4.26031   1
  -1   9   9 70.8490 6.62943   1
   0   9   9 14.6655 5.81903   1
   2 -11  10 12.7428 4.78816   1
   3 -11  10 22.5980 3.97006   1
  -1 -10  11 13.3423 12.0165  -2
  -1 -10  10 13.3423 12.0165   1
   0 -10  11 2.44448 15.5669  -2
   0 -10  10 2.44448 15.5669   1
   1 -10  11 51.9978 13.5117  -2
   1 -10  10 51.9978 13.5117   1
   2 -10  11 43.3890 15.7435  -2
   2 -10  10 43.3890 15.7435   1
   3 -10  11 87.3350 27.6921  -2
   3 -10  10 87.3350 27.6921   1
   4 -10  10 35.3650 20.4617  -2
   4 -10  10 35.3650 20.4617   1
   5 -10  10 58.5728 19.2503  -2
   5 -10  10 58.5728 19.2503   1
   6 -10  10 115.135 17.7634  -2
   6 -10  10 115.135 17.7634   1
  -3  -9  11 -6.4103 30.4890  -2
  -3  -9  10 -6.4103 30.4890   1
  -2  -9  11 122.116 18.9363  -2
  -2  -9  10 122.116 18.9363   1
  -1  -9  11 145.251 16.0545  -2
  -1  -9  10 145.251 16.0545   1
   0  -9  11 93.2923 13.1386  -2
   0  -9  10 93.2923 13.1386   1
   1  -9  11 93.8727 16.0302  -2
   1  -9  10 93.8727 16.0302   1
   2  -9  11 53.3265 19.7851  -2
   2  -9  10 53.3265 19.7851   1
   3  -9  10 113.764 22.9690  -2
   3  -9  10 113.764 22.9690   1
   4  -9  10 58.4012 13.0523  -2
   4  -9  10 58.4012 13.0523   1
   5  -9  10 265.719 16.0169  -2
   5  -9  10 265.719 16.0169   1
   6  -9  10 17.4634 11.8911  -2
   6  -9  10 17.4634 11.8911   1
   7  -9  10 110.501 16.3940  -2
   7  -9  10 110.501 16.3940   1
  -4  -8  11 -49.271 38.0331  -2
  -4  -8  10 -49.271 38.0331   1
  -3  -8  11 0.35467 26.2492  -2
  -3  -8  10 0.35467 26.2492   1
  -2  -8  11 42.2839 15.2525  -2
  -2  -8  10 42.2839 15.2525   1
  -1  -8  11 91.1885 13.3002  -2
  -1  -8  10 91.1885 13.3002   1
   0  -8  11 322.269 18.5053  -2
   0  -8  10 322.269 18.5053   1
   1  -8  11 -21.791 19.0936  -2
   1  -8  10 -21.791 19.0936   1
   2  -8  10 11.3669 4.49211   1
   3  -8  10 3.56720 19.1819  -2
   3  -8  10 3.56720 19.1819   1
   4  -8  10 83.1529 13.6898  -2
   4  -8  10 83.1529 13.6898   1
   5  -8  10 6.92352 9.68925  -2
   5  -8  10 6.92352 9.68925   1
   6  -8  10 162.214 13.1520  -2
   6  -8  10 162.214 13.1520   1
   7  -8  10 137.979 17.7707  -2
   7  -8  10 137.979 17.7707   1
   8  -8  10 61.5633 28.1406  -2
   8  -8  10 61.5633 28.1406   1
  -5  -7  10 19.3778 6.22605   1
  -4  -7  11 38.8660 69.7774  -2
  -4  -7  10 38.8660 69.7774   1
  -3  -7  11 289.076 23.4191  -2
  -3  -7  10 289.076 23.4191   1
  -2  -7  11 56.5972 11.8463  -2
  -2  -7  10 56.5972 11.8463   1
  -1  -7  11 259.444 13.5393  -2
  -1  -7  10 259.444 13.5393   1
   0  -7  10 14.2827 4.19079   1
   1  -7  10 21.1804 3.96726   1
   2  -7  10 195.968 27.2831  -2
   2  -7  10 195.968 27.2831   1
   3  -7  10 117.399 17.7072  -2
   3  -7  10 117.399 17.7072   1
   4  -7  10 -2.8297 10.7837  -2
   4  -7  10 -2.8297 10.7837   1
   5  -7  10 18.2679 9.98245  -2
   5  -7  10 18.2679 9.98245   1
   6  -7  10 48.8221 13.6047  -2
   6  -7  10 48.8221 13.6047   1
   7  -7  10 118.644 26.0549  -2
   7  -7  10 118.644 26.0549   1
   8  -7  10 19.8903 27.0997  -2
   8  -7  10 19.8903 27.0997   1
  -6  -6  10 7.44842 6.84949   1
  -5  -6  10 12.0390 5.89871   1
  -4  -6  11 100.522 60.9772  -2
  -4  -6  10 100.522 60.9772   1
  -3  -6  11 55.2722 13.6924  -2
  -3  -6  10 55.2722 13.6924   1
  -2  -6  11 150.230 15.3685  -2
  -2  -6  10 150.230 15.3685   1
  -1  -6  11 7.30696 58.2520  -2
  -1  -6  10 7.30696 58.2520   1
   0  -6  10 67.2670 5.87777   1
   1  -6  10 27.9561 4.58001   1
   2  -6  10 76.4876 28.2244  -2
   2  -6  10 76.4876 28.2244   1
   3  -6  10 181.880 18.6239  -2
   3  -6  10 181.880 18.6239   1
   4  -6  10 -15.537 12.6598  -2
   4  -6  10 -15.537 12.6598   1
   5  -6  10 -2.7810 13.5200  -2
   5  -6  10 -2.7810 13.5200   1
   6  -6  10 63.0214 20.3647  -2
   6  -6  10 63.0214 20.3647   1
   7  -6  10 49.7346 34.1330  -2
   7  -6  10 49.7346 34.1330   1
   8  -6  10 49.0106 63.9980  -2
   8  -6  10 49.0106 63.9980   1
   9  -6   9 26.2559 28.1834  -2
   9  -6  10 26.2559 28.1834   1
  -7  -5  10 38.4750 8.78637   1
  -6  -5  10 21.8628 6.83172   1
  -5  -5  10 113.779 8.92648   1
  -4  -5  11 118.078 72.6526  -2
  -4  -5  10 118.078 72.6526   1
  -3  -5  11 273.117 48.1677  -2
  -3  -5  10 273.117 48.1677   1
  -2  -5  10 157.233 7.78251   1
  -1  -5  10 390.046 9.90912   1
   0  -5  10 330.527 9.90324   1
   1  -5  10 65.7837 5.03054   1
   2  -5  10 12.6115 21.7275  -2
   2  -5  10 12.6115 21.7275   1
   3  -5  10 252.415 19.9595  -2
   3  -5  10 252.415 19.9595   1
   4  -5  10 204.999 19.6382  -2
   4  -5  10 204.999 19.6382   1
   5  -5  10 33.5140 24.5441  -2
   5  -5  10 33.5140 24.5441   1
   6  -5  10 28.1413 41.1659  -2
   6  -5  10 28.1413 41.1659   1
   7  -5  10 10.8791 5.44759   1
   8  -5   9 -33.321 60.3631  -2
   8  -5  10 -33.321 60.3631   1
   9  -5   9 65.3626 28.8535  -2
   9  -5  10 65.3626 28.8535   1
  -7  -4  10 15.8134 6.20522   1
  -6  -4  10 39.7568 7.05348   1
  -5  -4  11 176.643 59.9916  -2
  -5  -4  10 176.643 59.9916   1
  -4  -4  11 51.4100 46.3840  -2
  -4  -4  10 51.4100 46.3840   1
  -3  -4  10 200.829 8.85180   1
  -2  -4  10 144.460 6.96352   1
  -1  -4  10 164.163 7.40209   1
   0  -4  10 433.596 10.0728   1
   1  -4  10 529.579 9.71922   1
   2  -4  10 89.5744 5.80296   1
   3  -4  10 69.4086 43.2355  -2
   3  -4  10 69.4086 43.2355   1
   4  -4  10 664.073 79.3171  -2
   4  -4  10 664.073 79.3171   1
   5  -4  10 14.5930 4.54162   1
   6  -4  10 119.800 7.98814   1
   7  -4  10 23.8266 6.15487   1
   8  -4   9 -42.868 32.2802  -2
   8  -4  10 -42.868 32.2802   1
   9  -4   9 9.71686 24.7459  -2
   9  -4  10 9.71686 24.7459   1
  -8  -3  10 23.1247 7.04126   1
  -7  -3  10 62.6462 8.65759   1
  -6  -3  10 45.3337 6.99615   1
  -5  -3  10 145.855 9.42596   1
  -4  -3  10 754.114 16.6766   1
  -3  -3  10 133.536 7.67966   1
  -2  -3  10 13.0662 4.04382   1
  -1  -3  10 38.6747 4.73205   1
   0  -3  10 -2.8469 3.00374   1
   1  -3  10 1002.31 15.3494   1
   2  -3  10 41.6159 4.64039   1
   3  -3  10 46.7594 4.01631   1
   4  -3  10 61.6433 5.97430   1
   5  -3  10 15.4361 3.98172   1
   6  -3  10 29.1945 6.53228   1
   7  -3  10 195.134 12.4698   1
   8  -3   9 211.885 40.9207  -2
   8  -3  10 211.885 40.9207   1
   9  -3   9 103.486 39.2277  -2
   9  -3  10 103.486 39.2277   1
  -8  -2  10 25.1476 7.28136   1
  -7  -2  10 317.152 11.7399   1
  -6  -2  10 15.2274 5.71960   1
  -5  -2  10 55.8489 7.05094   1
  -4  -2  10 115.018 7.97245   1
  -3  -2  10 10.7520 4.31792   1
  -2  -2  10 12.3413 3.35435   1
  -1  -2  10 734.721 13.3828   1
   0  -2  10 93.9248 5.94305   1
   1  -2  10 7.16927 3.24430   1
   2  -2  10 1358.05 18.2386   1
   3  -2  10 210.994 7.56709   1
   4  -2  10 103.575 7.67410   1
   5  -2  10 4.66784 3.97344   1
   6  -2  10 73.3849 7.74929   1
   7  -2  10 375.999 17.3921   1
   8  -2   9 43.3005 38.0578  -2
   8  -2  10 43.3005 38.0578   1
   9  -2   9 80.5765 47.2321  -2
   9  -2  10 80.5765 47.2321   1
  -9  -1  10 15.7761 8.70828   1
  -8  -1  10 8.42920 6.88368   1
  -7  -1  10 12.9181 5.25227   1
  -6  -1  10 485.578 14.9992   1
  -5  -1  10 6.11353 4.72894   1
  -4  -1  10 72.0024 6.64306   1
  -3  -1  10 3.84651 3.62779   1
  -2  -1  10 270.607 8.36136   1
  -1  -1  10 2.95700 3.47848   1
   0  -1  10 263.473 7.29950   1
   1  -1  10 27.5863 4.29590   1
   2  -1  10 4.75665 2.40774   1
   3  -1  10 194.201 8.44439   1
   4  -1  10 118.107 7.53790   1
   5  -1  10 252.759 10.0712   1
   6  -1  10 80.6188 8.11462   1
   7  -1   9 288.291 96.0455  -2
   7  -1  10 288.291 96.0455   1
   8  -1   9 -22.335 45.9136  -2
   8  -1  10 -22.335 45.9136   1
  -9   0  10 110.024 11.0672   1
  -8   0  10 19.7996 5.68612   1
  -7   0  10 10.1496 5.41579   1
  -6   0  10 163.687 9.00695   1
  -5   0  10 25.0074 5.55472   1
  -4   0  10 147.773 7.99195   1
  -3   0  10 7.70555 3.64882   1
  -2   0  10 354.265 8.64291   1
  -1   0  10 38.9574 4.68399   1
   0   0  10 33.2292 3.88952   1
   1   0  10 89.2911 5.92144   1
   2   0  10 106.535 5.98513   1
   3   0  10 2.39724 3.02869   1
   4   0  10 36.1445 5.03195   1
   5   0  10 16.5654 3.68663   1
   6   0  10 20.7944 5.77196   1
   7   0  10 113.681 10.5200   1
   8   0  10 2.34182 7.53424   1
  -9   1  10 84.6263 8.96209   1
  -8   1  10 -3.7657 5.88453   1
  -7   1  10 66.7253 7.25416   1
  -6   1  10 7.65609 4.32803   1
  -5   1  10 64.7771 5.82501   1
  -4   1  10 207.457 8.62436   1
  -3   1  10 3.99343 3.56813   1
  -2   1  10 28.0415 3.33123   1
  -1   1  10 40.3161 4.24693   1
   0   1  10 73.0303 4.49587   1
   1   1  10 433.696 9.61891   1
   2   1  10 167.873 7.37177   1
   3   1  10 14.3171 4.08341   1
   4   1  10 103.358 6.96212   1
   5   1  10 72.2072 7.22036   1
   6   1  10 78.3713 9.08595   1
   7   1  10 80.5472 9.75447   1
   8   1  10 16.2573 8.77086   1
  -9   2  10 4.88989 7.38475   1
  -8   2  10 23.9903 7.71503   1
  -7   2  10 7.46823 4.15322   1
  -6   2  10 166.529 10.1474   1
  -5   2  10 208.863 7.92893   1
  -4   2  10 290.893 9.59065   1
  -3   2  10 773.185 14.1416   1
  -2   2  10 213.765 7.33474   1
  -1   2  10 34.5058 3.95812   1
   0   2  10 129.562 4.88764   1
   1   2  10 404.804 9.09769   1
   2   2  10 145.207 5.43041   1
   3   2  10 326.625 9.59964   1
   4   2  10 123.987 6.62167   1
   5   2  10 371.794 11.7323   1
   6   2  10 5.50563 5.67195   1
   7   2  10 29.4312 7.44514   1
  -9   3  10 71.5683 9.10008   1
  -8   3  10 56.1355 8.68290   1
  -7   3  10 4.96223 5.45552   1
  -6   3  10 10.9094 3.96086   1
  -5   3  10 266.241 9.44636   1
  -4   3  10 -3.5428 2.76689   1
  -3   3  10 44.6499 4.39887   1
  -2   3  10 1.85755 3.31438   1
  -1   3  10 89.0194 5.01772   1
   0   3  10 22.3447 2.90775   1
   1   3  10 21.1156 3.85673   1
   2   3  10 450.354 10.1487   1
   3   3  10 55.7889 6.37731   1
   4   3  10 16.1752 5.81423   1
   5   3  10 12.4097 6.00151   1
   6   3  10 9.96580 6.42981   1
   7   3  10 52.4694 7.98023   1
  -9   4  10 30.5656 8.20107   1
  -8   4  10 65.3219 7.88900   1
  -7   4  10 40.9608 6.94130   1
  -6   4  10 14.7575 3.34049   1
  -5   4  10 8.87910 4.84347   1
  -4   4  10 74.2440 6.18515   1
  -3   4  10 0.79801 3.02073   1
  -2   4  10 153.152 6.21981   1
  -1   4  10 2.72597 2.78143   1
   0   4  10 158.694 5.57013   1
   1   4  10 72.0905 4.87307   1
   2   4  10 51.5368 5.25776   1
   3   4  10 4.94269 4.27997   1
   4   4  10 39.8066 6.41471   1
   5   4  10 26.4304 6.43200   1
   6   4  10 20.8999 6.92638   1
  -9   5  10 36.2299 8.19607   1
  -8   5  10 80.3461 7.91341   1
  -7   5  10 50.3052 6.41572   1
  -6   5  10 244.321 9.83342   1
  -5   5  10 3.15055 4.50990   1
  -4   5  10 18.1609 4.16261   1
  -3   5  10 75.3009 5.65043   1
  -2   5  10 336.963 9.07810   1
  -1   5  10 33.5392 3.91686   1
   0   5  10 13.6395 3.94603   1
   1   5  10 -0.1907 3.85513   1
   2   5  10 84.8598 6.77874   1
   3   5  10 -0.0323 4.53441   1
   4   5  10 138.018 10.4732   1
   5   5  10 18.3610 6.59468   1
  -9   6  10 4.04573 5.78536   1
  -8   6  10 46.6518 6.86094   1
  -7   6  10 20.4366 5.77755   1
  -6   6  10 51.4828 5.62685   1
  -5   6  10 21.3301 5.23078   1
  -4   6  10 9.65696 4.28120   1
  -3   6  10 318.864 9.46880   1
  -2   6  10 268.710 7.90836   1
  -1   6  10 224.780 8.27474   1
   0   6  10 62.9012 5.07163   1
   1   6  10 38.2661 4.87936   1
   2   6  10 366.415 12.5689   1
   3   6  10 180.988 10.0297   1
   4   6  10 4.40160 7.05114   1
  -8   7  10 17.7642 5.65369   1
  -7   7  10 35.9041 6.11670   1
  -6   7  10 62.2033 6.87768   1
  -5   7  10 75.0389 6.17698   1
  -4   7  10 87.8212 7.35318   1
  -3   7  10 364.112 10.2120   1
  -2   7  10 9.68996 3.39998   1
  -1   7  10 110.496 6.53112   1
   0   7  10 41.2024 4.67674   1
   1   7  10 3.92966 4.33646   1
   2   7  10 60.4030 6.51076   1
   3   7  10 73.0757 7.08645   1
  -7   8  10 7.16271 5.84497   1
  -6   8  10 39.0824 5.97693   1
  -5   8  10 15.8601 4.73389   1
  -4   8  10 119.235 7.49053   1
  -3   8  10 98.8288 5.95548   1
  -2   8  10 2.02518 3.04533   1
  -1   8  10 53.0768 4.38487   1
   0   8  10 -3.9609 4.37245   1
   1   8  10 31.5939 5.62988   1
   2   8  10 21.7740 6.04304   1
  -6   9  10 44.2667 6.51747   1
  -5   9  10 17.0896 4.21936   1
  -4   9  10 37.8011 6.33119   1
  -3   9  10 11.8822 5.00035   1
  -2   9  10 34.8704 5.24434   1
  -1   9  10 31.8957 6.05208   1
   0   9  10 9.14416 12.8263   1
  -1 -10  11 3.20088 5.71813   1
   0 -10  12 70.3837 17.1259  -2
   0 -10  11 70.3837 17.1259   1
   1 -10  12 48.3498 19.2757  -2
   1 -10  11 48.3498 19.2757   1
   2 -10  12 27.4382 20.6196  -2
   2 -10  11 27.4382 20.6196   1
   3 -10  12 71.3550 37.3777  -2
   3 -10  11 71.3550 37.3777   1
   4 -10  11 35.7004 17.8790  -2
   4 -10  11 35.7004 17.8790   1
   5 -10  11 9.52508 16.2702  -2
   5 -10  11 9.52508 16.2702   1
  -3  -9  11 12.2370 5.88419   1
  -2  -9  12 127.873 26.6060  -2
  -2  -9  11 127.873 26.6060   1
  -1  -9  12 59.8895 13.7829  -2
  -1  -9  11 59.8895 13.7829   1
   0  -9  12 127.419 14.8446  -2
   0  -9  11 127.419 14.8446   1
   1  -9  12 96.1566 14.0096  -2
   1  -9  11 96.1566 14.0096   1
   2  -9  12 61.5814 27.7169  -2
   2  -9  11 61.5814 27.7169   1
   3  -9  11 59.0939 6.50387   1
   4  -9  11 98.6523 19.1089  -2
   4  -9  11 98.6523 19.1089   1
   5  -9  11 266.115 18.1316  -2
   5  -9  11 266.115 18.1316   1
   6  -9  11 75.6442 16.2700  -2
   6  -9  11 75.6442 16.2700   1
   7  -9  11 8.14783 14.3230  -2
   7  -9  11 8.14783 14.3230   1
  -4  -8  12 -53.763 74.0522  -2
  -4  -8  11 -53.763 74.0522   1
  -3  -8  12 5.08286 26.1293  -2
  -3  -8  11 5.08286 26.1293   1
  -2  -8  12 60.7183 15.3226  -2
  -2  -8  11 60.7183 15.3226   1
  -1  -8  12 91.7597 14.0163  -2
  -1  -8  11 91.7597 14.0163   1
   0  -8  12 22.5440 15.6117  -2
   0  -8  11 22.5440 15.6117   1
   1  -8  12 111.798 33.5699  -2
   1  -8  11 111.798 33.5699   1
   2  -8  11 117.301 7.38858   1
   3  -8  11 60.6420 34.6331  -2
   3  -8  11 60.6420 34.6331   1
   4  -8  11 31.9229 14.9631  -2
   4  -8  11 31.9229 14.9631   1
   5  -8  11 30.2917 14.6252  -2
   5  -8  11 30.2917 14.6252   1
   6  -8  11 -9.8477 11.9703  -2
   6  -8  11 -9.8477 11.9703   1
   7  -8  11 37.2760 16.7557  -2
   7  -8  11 37.2760 16.7557   1
  -5  -7  11 23.0370 6.90082   1
  -4  -7  12 108.388 77.9612  -2
  -4  -7  11 108.388 77.9612   1
  -3  -7  12 413.926 44.3645  -2
  -3  -7  11 413.926 44.3645   1
  -2  -7  12 56.1202 20.2962  -2
  -2  -7  11 56.1202 20.2962   1
  -1  -7  12 2.51030 13.5249  -2
  -1  -7  11 2.51030 13.5249   1
   0  -7  12 12.7786 51.3539  -2
   0  -7  11 12.7786 51.3539   1
   1  -7  11 84.2780 5.94384   1
   2  -7  11 -0.4845 3.78013   1
   3  -7  11 177.039 33.9012  -2
   3  -7  11 177.039 33.9012   1
   4  -7  11 16.9522 14.0196  -2
   4  -7  11 16.9522 14.0196   1
   5  -7  11 97.5567 15.4253  -2
   5  -7  11 97.5567 15.4253   1
   6  -7  11 -14.091 14.6037  -2
   6  -7  11 -14.091 14.6037   1
   7  -7  11 16.4448 22.9320  -2
   7  -7  11 16.4448 22.9320   1
   8  -7  11 14.5186 36.0192  -2
   8  -7  11 14.5186 36.0192   1
  -6  -6  11 6.54996 7.42220   1
  -5  -6  11 54.6784 7.12609   1
  -4  -6  11 16.6720 5.83384   1
  -3  -6  12 91.0634 35.5356  -2
  -3  -6  11 91.0634 35.5356   1
  -2  -6  11 15.2811 4.58530   1
  -1  -6  11 7.68506 3.60332   1
   0  -6  11 12.6212 4.48105   1
   1  -6  11 461.197 10.9691   1
   2  -6  11 21.4280 36.5226  -2
   2  -6  11 21.4280 36.5226   1
   3  -6  11 47.6793 22.1398  -2
   3  -6  11 47.6793 22.1398   1
   4  -6  11 515.607 19.7312  -2
   4  -6  11 515.607 19.7312   1
   5  -6  11 143.329 15.1544  -2
   5  -6  11 143.329 15.1544   1
   6  -6  11 87.5992 21.1722  -2
   6  -6  11 87.5992 21.1722   1
   7  -6  11 95.4699 36.8023  -2
   7  -6  11 95.4699 36.8023   1
   8  -6  11 86.8540 9.27414   1
  -7  -5  11 9.63550 8.19095   1
  -6  -5  11 88.4538 10.0166   1
  -5  -5  11 6.93856 5.64037   1
  -4  -5  11 83.6462 8.26998   1
  -3  -5  11 84.5175 6.83101   1
  -2  -5  11 0.12709 3.86526   1
  -1  -5  11 236.983 9.54198   1
   0  -5  11 427.148 12.2270   1
   1  -5  11 262.996 8.60275   1
   2  -5  11 22.8810 3.53537   1
   3  -5  11 12.4560 33.3835  -2
   3  -5  11 12.4560 33.3835   1
   4  -5  11 358.166 30.8575  -2
   4  -5  11 358.166 30.8575   1
   5  -5  11 29.7168 31.7453  -2
   5  -5  11 29.7168 31.7453   1
   6  -5  11 782.022 17.1350   1
   7  -5  11 69.6579 6.64449   1
   8  -5  11 31.6375 6.60899   1
  -7  -4  11 60.8987 7.98987   1
  -6  -4  11 176.115 9.81349   1
  -5  -4  11 -0.1687 6.06253   1
  -4  -4  11 135.540 8.58565   1
  -3  -4  11 8.44788 4.60678   1
  -2  -4  11 20.5842 4.28260   1
  -1  -4  11 548.383 11.8447   1
   0  -4  11 112.040 6.44721   1
   1  -4  11 196.717 7.22810   1
   2  -4  11 13.2534 3.41494   1
   3  -4  11 27.7554 4.40930   1
   4  -4  11 0.18152 3.15355   1
   5  -4  11 -0.2906 4.28342   1
   6  -4  11 283.656 11.6959   1
   7  -4  11 188.210 10.4123   1
   8  -4  10 -11.099 45.1893  -2
   8  -4  11 -11.099 45.1893   1
  -8  -3  11 51.3138 7.87466   1
  -7  -3  11 23.8290 7.28730   1
  -6  -3  11 41.1867 8.39434   1
  -5  -3  11 -2.3941 5.37717   1
  -4  -3  11 1.72716 4.47507   1
  -3  -3  11 321.266 9.53397   1
  -2  -3  11 393.193 9.45525   1
  -1  -3  11 767.083 14.3580   1
   0  -3  11 6.61836 3.63048   1
   1  -3  11 83.7750 5.39062   1
   2  -3  11 123.368 6.80627   1
   3  -3  11 253.496 8.30345   1
   4  -3  11 352.364 11.1714   1
   5  -3  11 14.5621 4.36771   1
   6  -3  11 -2.3075 5.01709   1
   7  -3  11 27.1758 7.34552   1
   8  -3  10 219.046 42.0645  -2
   8  -3  11 219.046 42.0645   1
  -8  -2  11 54.8674 8.36547   1
  -7  -2  11 18.9784 6.59400   1
  -6  -2  11 66.3634 7.85732   1
  -5  -2  11 32.2879 6.33394   1
  -4  -2  11 11.7302 4.76036   1
  -3  -2  11 179.236 9.50641   1
  -2  -2  11 7.59556 3.37964   1
  -1  -2  11 368.449 10.4852   1
   0  -2  11 183.341 6.85020   1
   1  -2  11 104.371 5.53192   1
   2  -2  11 49.6546 4.89514   1
   3  -2  11 331.516 9.45421   1
   4  -2  11 166.352 8.61712   1
   5  -2  11 49.9448 5.72153   1
   6  -2  11 -0.5996 5.32308   1
   7  -2  11 22.0288 7.17675   1
   8  -2  10 147.195 53.9122  -2
   8  -2  11 147.195 53.9122   1
  -9  -1  11 14.4947 8.53055   1
  -8  -1  11 17.5578 6.29819   1
  -7  -1  11 75.4728 8.92419   1
  -6  -1  11 86.7528 8.71169   1
  -5  -1  11 -1.8375 4.88043   1
  -4  -1  11 61.4812 5.77604   1
  -3  -1  11 59.6132 5.82574   1
  -2  -1  11 123.414 5.77079   1
  -1  -1  11 21.6109 4.13470   1
   0  -1  11 33.2356 3.90635   1
   1  -1  11 1093.19 17.5213   1
   2  -1  11 100.486 5.47481   1
   3  -1  11 17.7796 3.55236   1
   4  -1  11 84.5437 6.35368   1
   5  -1  11 19.0904 5.18511   1
   6  -1  11 27.5267 6.48605   1
   7  -1  11 11.5911 7.37745   1
   8  -1  11 -4.1348 7.29500   1
  -9   0  11 39.3402 9.62199   1
  -8   0  11 8.43305 7.14926   1
  -7   0  11 116.902 9.94458   1
  -6   0  11 7.49080 5.49680   1
  -5   0  11 86.8601 7.49842   1
  -4   0  11 102.994 7.44149   1
  -3   0  11 21.1619 4.40405   1
  -2   0  11 3.91636 4.31719   1
  -1   0  11 78.2412 5.11886   1
   0   0  11 74.6514 4.66067   1
   1   0  11 448.600 10.8681   1
   2   0  11 24.8593 4.59189   1
   3   0  11 9.12074 3.73257   1
   4   0  11 160.226 8.92970   1
   5   0  11 11.7989 4.47343   1
   6   0  11 142.898 10.2855   1
   7   0  11 278.953 14.3469   1
   8   0  11 -2.1143 7.15666   1
  -9   1  11 4.89862 6.49405   1
  -8   1  11 14.8233 7.23918   1
  -7   1  11 168.692 9.51492   1
  -6   1  11 56.4461 7.60923   1
  -5   1  11 145.378 7.78333   1
  -4   1  11 63.9757 6.47434   1
  -3   1  11 128.850 7.53207   1
  -2   1  11 30.7669 3.99857   1
  -1   1  11 88.7845 5.56876   1
   0   1  11 485.309 9.82477   1
   1   1  11 13.5932 3.30809   1
   2   1  11 316.657 9.28189   1
   3   1  11 48.3122 5.63460   1
   4   1  11 0.57150 4.59606   1
   5   1  11 194.172 10.4537   1
   6   1  11 -1.5029 5.70017   1
   7   1  11 109.319 10.4205   1
  -9   2  11 10.3652 7.41162   1
  -8   2  11 95.8131 8.36702   1
  -7   2  11 109.439 8.51507   1
  -6   2  11 950.898 20.6227   1
  -5   2  11 57.7803 5.36973   1
  -4   2  11 342.456 10.8481   1
  -3   2  11 2.20441 3.86691   1
  -2   2  11 205.299 6.84692   1
  -1   2  11 231.280 7.86389   1
   0   2  11 992.515 15.9273   1
   1   2  11 106.153 5.72371   1
   2   2  11 1.50783 3.16608   1
   3   2  11 84.2349 6.03886   1
   4   2  11 7.77407 4.20526   1
   5   2  11 103.647 6.98162   1
   6   2  11 175.022 10.2121   1
   7   2  11 4.33608 7.13025   1
  -9   3  11 8.26491 6.76420   1
  -8   3  11 76.1112 8.79645   1
  -7   3  11 23.5201 5.55431   1
  -6   3  11 5.82945 4.76247   1
  -5   3  11 236.174 8.86029   1
  -4   3  11 62.0743 5.29184   1
  -3   3  11 13.8000 4.05315   1
  -2   3  11 1.32143 3.00669   1
  -1   3  11 3.26976 3.18367   1
   0   3  11 72.3244 5.15908   1
   1   3  11 0.26673 3.22828   1
   2   3  11 26.2577 4.49219   1
   3   3  11 48.7630 5.58782   1
   4   3  11 6.45687 5.03569   1
   5   3  11 169.037 8.97044   1
   6   3  11 20.0414 7.32433   1
  -9   4  11 8.94420 7.39236   1
  -8   4  11 58.8315 7.19292   1
  -7   4  11 13.8922 5.34183   1
  -6   4  11 21.3847 5.75730   1
  -5   4  11 29.6805 5.42533   1
  -4   4  11 29.9262 4.13070   1
  -3   4  11 29.8334 4.31794   1
  -2   4  11 139.972 6.67439   1
  -1   4  11 210.694 7.54018   1
   0   4  11 168.352 5.81664   1
   1   4  11 7.62000 3.67487   1
   2   4  11 -3.5833 3.73249   1
   3   4  11 19.7864 5.61599   1
   4   4  11 -0.0700 5.05622   1
   5   4  11 -7.4066 6.54301   1
   6   4  11 13.3972 6.51358   1
  -9   5  11 50.1695 8.01175   1
  -8   5  11 32.0746 8.08186   1
  -7   5  11 24.1469 6.18254   1
  -6   5  11 6.80420 5.31137   1
  -5   5  11 49.3113 7.06040   1
  -4   5  11 3.71307 4.02353   1
  -3   5  11 24.2258 3.57416   1
  -2   5  11 56.6467 4.99422   1
  -1   5  11 94.0831 5.69866   1
   0   5  11 34.7704 4.40010   1
   1   5  11 103.583 6.85721   1
   2   5  11 185.979 8.12828   1
   3   5  11 137.088 7.87862   1
   4   5  11 56.4375 6.64156   1
   5   5  11 9.05292 7.28940   1
  -8   6  11 41.4198 6.84714   1
  -7   6  11 15.8972 5.24419   1
  -6   6  11 30.5151 5.22307   1
  -5   6  11 196.225 9.97515   1
  -4   6  11 42.1240 5.75694   1
  -3   6  11 44.9371 4.79548   1
  -2   6  11 354.084 9.96635   1
  -1   6  11 5.31297 3.89104   1
   0   6  11 -2.0040 3.73166   1
   1   6  11 30.8554 5.57269   1
   2   6  11 11.5605 5.26153   1
   3   6  11 152.393 8.86582   1
   4   6  11 17.9558 7.57292   1
  -8   7  11 18.9534 6.69167   1
  -7   7  11 22.3421 6.12170   1
  -6   7  11 8.25426 5.26091   1
  -5   7  11 26.5463 5.28055   1
  -4   7  11 240.498 10.2749   1
  -3   7  11 -0.6561 4.34931   1
  -2   7  11 3.25565 3.11863   1
  -1   7  11 77.4106 5.72311   1
   0   7  11 17.9334 4.54935   1
   1   7  11 152.650 8.38155   1
   2   7  11 60.1825 6.98308   1
   3   7  11 9.69153 7.73897   1
  -7   8  11 11.7805 6.63007   1
  -6   8  11 2.04172 5.67911   1
  -5   8  11 1.26782 5.44219   1
  -4   8  11 134.004 7.30646   1
  -3   8  11 35.3654 5.26278   1
  -2   8  11 43.2791 4.63348   1
  -1   8  11 5.10458 4.46845   1
   0   8  11 8.91750 4.42870   1
   1   8  11 67.6146 6.69563   1
  -5   9  11 39.2953 5.79433   1
  -4   9  11 18.4119 5.90320   1
  -3   9  11 23.2579 5.54094   1
  -2   9  11 32.9769 6.15916   1
   0 -10  13 161.048 18.1989  -2
   0 -10  12 161.048 18.1989   1
   1 -10  13 7.95939 18.3863  -2
   1 -10  12 7.95939 18.3863   1
   2 -10  13 34.8647 16.7709  -2
   2 -10  12 34.8647 16.7709   1
   3 -10  12 22.6237 6.61315   1
   4 -10  12 66.4415 32.8112  -2
   4 -10  12 66.4415 32.8112   1
   5 -10  12 37.9172 19.2104  -2
   5 -10  12 37.9172 19.2104   1
  -2  -9  13 22.1880 29.7695  -2
  -2  -9  12 22.1880 29.7695   1
  -1  -9  13 38.3431 17.7719  -2
  -1  -9  12 38.3431 17.7719   1
   0  -9  13 200.600 18.6781  -2
   0  -9  12 200.600 18.6781   1
   1  -9  13 194.145 46.2541  -2
   1  -9  12 194.145 46.2541   1
   2  -9  13 -73.160 48.7628  -2
   2  -9  12 -73.160 48.7628   1
   3  -9  12 21.2990 5.99535   1
   4  -9  12 -10.748 27.6261  -2
   4  -9  12 -10.748 27.6261   1
   5  -9  12 515.382 23.7806  -2
   5  -9  12 515.382 23.7806   1
   6  -9  12 11.9160 16.7732  -2
   6  -9  12 11.9160 16.7732   1
  -4  -8  12 16.7279 6.20395   1
  -3  -8  13 182.179 72.4453  -2
  -3  -8  12 182.179 72.4453   1
  -2  -8  13 74.3170 26.9215  -2
  -2  -8  12 74.3170 26.9215   1
  -1  -8  13 58.8932 24.3607  -2
  -1  -8  12 58.8932 24.3607   1
   0  -8  13 37.1128 34.2905  -2
   0  -8  12 37.1128 34.2905   1
   1  -8  12 97.5170 7.46221   1
   2  -8  12 14.7965 4.28846   1
   3  -8  12 36.3948 5.30255   1
   4  -8  12 4.25054 29.8025  -2
   4  -8  12 4.25054 29.8025   1
   5  -8  12 86.1608 17.3982  -2
   5  -8  12 86.1608 17.3982   1
   6  -8  12 103.244 15.9231  -2
   6  -8  12 103.244 15.9231   1
   7  -8  12 22.4353 20.2581  -2
   7  -8  12 22.4353 20.2581   1
  -5  -7  12 14.8178 6.27618   1
  -4  -7  12 6.27795 5.44201   1
  -3  -7  13 403.585 86.3932  -2
  -3  -7  12 403.585 86.3932   1
  -2  -7  13 98.1782 34.2832  -2
  -2  -7  12 98.1782 34.2832   1
  -1  -7  13 109.390 58.9621  -2
  -1  -7  12 109.390 58.9621   1
   0  -7  12 12.5354 4.91291   1
   1  -7  12 106.648 7.14336   1
   2  -7  12 27.8968 4.94454   1
   3  -7  12 10.8026 25.6637  -2
   3  -7  12 10.8026 25.6637   1
   4  -7  12 14.7101 23.4233  -2
   4  -7  12 14.7101 23.4233   1
   5  -7  12 43.3795 16.6567  -2
   5  -7  12 43.3795 16.6567   1
   6  -7  12 -15.446 20.5915  -2
   6  -7  12 -15.446 20.5915   1
   7  -7  12 18.3142 24.5661  -2
   7  -7  12 18.3142 24.5661   1
   8  -7  12 36.2645 40.1801  -2
   8  -7  12 36.2645 40.1801   1
  -6  -6  12 19.0532 7.76780   1
  -5  -6  12 17.0758 6.16704   1
  -4  -6  12 -0.5522 5.64286   1
  -3  -6  12 42.3526 6.65071   1
  -2  -6  12 807.148 15.2414   1
  -1  -6  12 78.3237 5.32696   1
   0  -6  12 69.4877 6.49546   1
   1  -6  12 17.3449 4.39146   1
   2  -6  12 16.5888 4.68628   1
   3  -6  12 12.3812 3.78374   1
   4  -6  12 81.9117 26.8840  -2
   4  -6  12 81.9117 26.8840   1
   5  -6  12 87.8565 46.4565  -2
   5  -6  12 87.8565 46.4565   1
   6  -6  12 71.1848 45.4758  -2
   6  -6  12 71.1848 45.4758   1
   7  -6  12 -28.764 43.7137  -2
   7  -6  12 -28.764 43.7137   1
   8  -6  12 12.2581 7.10096   1
  -6  -5  12 35.0584 6.15469   1
  -5  -5  12 149.616 10.2284   1
  -4  -5  12 66.5057 7.18487   1
  -3  -5  12 -2.4149 4.41348   1
  -2  -5  12 1.73097 4.57904   1
  -1  -5  12 26.0748 5.06704   1
   0  -5  12 198.463 6.97408   1
   1  -5  12 115.213 6.16366   1
   2  -5  12 16.4148 3.65655   1
   3  -5  12 17.9293 4.36598   1
   4  -5  12 65.6414 39.4524  -2
   4  -5  12 65.6414 39.4524   1
   5  -5  12 158.400 62.5356  -2
   5  -5  12 158.400 62.5356   1
   6  -5  12 4.41919 5.73961   1
   7  -5  12 16.9897 5.37789   1
   8  -5  12 26.3577 6.99127   1
  -7  -4  12 8.30436 7.49116   1
  -6  -4  12 49.8194 8.54492   1
  -5  -4  12 40.8491 7.36488   1
  -4  -4  12 17.7644 5.09118   1
  -3  -4  12 1.07250 3.70354   1
  -2  -4  12 6.90924 4.13133   1
  -1  -4  12 37.5713 5.26449   1
   0  -4  12 459.128 11.6789   1
   1  -4  12 250.502 8.53348   1
   2  -4  12 34.9467 4.49844   1
   3  -4  12 8.38792 4.45730   1
   4  -4  12 7.78094 4.52810   1
   5  -4  12 287.513 11.3018   1
   6  -4  12 137.832 9.36020   1
   7  -4  12 18.3468 7.14810   1
   8  -4  11 204.748 75.2758  -2
   8  -4  12 204.748 75.2758   1
  -8  -3  12 12.3878 7.65144   1
  -7  -3  12 7.04381 6.80612   1
  -6  -3  12 1.62256 6.18296   1
  -5  -3  12 178.751 11.1288   1
  -4  -3  12 21.7510 5.51696   1
  -3  -3  12 176.008 9.00050   1
  -2  -3  12 26.0849 4.90565   1
  -1  -3  12 12.2824 4.21167   1
   0  -3  12 69.2567 5.72156   1
   1  -3  12 207.952 7.95193   1
   2  -3  12 302.325 9.71314   1
   3  -3  12 133.419 6.58409   1
   4  -3  12 -1.1873 4.18419   1
   5  -3  12 19.1005 4.69905   1
   6  -3  12 191.752 11.1070   1
   7  -3  12 31.7665 6.82341   1
   8  -3  11 66.7525 64.9998  -2
   8  -3  12 66.7525 64.9998   1
  -8  -2  12 13.2053 6.91148   1
  -7  -2  12 490.341 19.0543   1
  -6  -2  12 4.16848 6.44225   1
  -5  -2  12 272.748 12.9250   1
  -4  -2  12 135.433 9.30034   1
  -3  -2  12 6.03069 3.81233   1
  -2  -2  12 65.5408 5.60278   1
  -1  -2  12 -0.7049 3.57363   1
   0  -2  12 570.528 10.7990   1
   1  -2  12 8.47889 3.46957   1
   2  -2  12 57.2836 5.40706   1
   3  -2  12 242.337 8.93557   1
   4  -2  12 90.4816 7.09844   1
   5  -2  12 12.8452 4.32634   1
   6  -2  12 20.1810 6.47493   1
   7  -2  12 -9.1001 6.14043   1
   8  -2  12 5.48911 7.69869   1
  -8  -1  12 96.3111 7.82941   1
  -7  -1  12 122.228 11.0105   1
  -6  -1  12 30.0910 7.46388   1
  -5  -1  12 162.489 9.84351   1
  -4  -1  12 40.6279 5.42461   1
  -3  -1  12 15.9223 4.54510   1
  -2  -1  12 532.879 11.2212   1
  -1  -1  12 4.96664 3.82362   1
   0  -1  12 183.239 7.03214   1
   1  -1  12 102.946 5.75951   1
   2  -1  12 0.60359 3.25897   1
   3  -1  12 9.67221 3.19426   1
   4  -1  12 10.9421 4.69064   1
   5  -1  12 21.7816 5.11508   1
   6  -1  12 12.2646 6.57142   1
   7  -1  12 -7.5229 6.31423   1
   8  -1  12 8.14866 8.82150   1
  -9   0  12 34.1420 7.67768   1
  -8   0  12 90.4700 7.95365   1
  -7   0  12 10.2741 6.84735   1
  -6   0  12 -6.3419 5.45351   1
  -5   0  12 16.8203 4.71973   1
  -4   0  12 3.62240 4.20873   1
  -3   0  12 11.0915 4.18235   1
  -2   0  12 193.594 7.59110   1
  -1   0  12 -0.9471 3.42778   1
   0   0  12 243.986 8.35306   1
   1   0  12 -0.7712 3.61221   1
   2   0  12 7.89353 3.81588   1
   3   0  12 30.7588 4.91537   1
   4   0  12 168.918 8.37799   1
   5   0  12 3.59850 5.15242   1
   6   0  12 39.6962 8.10547   1
   7   0  12 5.41322 7.79053   1
  -9   1  12 2.80432 6.22904   1
  -8   1  12 11.0266 7.39388   1
  -7   1  12 10.0494 7.20750   1
  -6   1  12 217.240 12.3096   1
  -5   1  12 227.710 10.8146   1
  -4   1  12 327.212 11.5612   1
  -3   1  12 63.4271 6.20374   1
  -2   1  12 3.13793 2.75532   1
  -1   1  12 34.7424 4.48839   1
   0   1  12 94.9470 5.42402   1
   1   1  12 896.451 15.0372   1
   2   1  12 398.065 11.0418   1
   3   1  12 -0.7203 3.92133   1
   4   1  12 105.898 7.86221   1
   5   1  12 207.636 11.5321   1
   6   1  12 1.36053 5.74362   1
   7   1  12 13.2797 7.04067   1
  -9   2  12 40.0904 6.46571   1
  -8   2  12 16.6231 7.00249   1
  -7   2  12 11.6583 7.49982   1
  -6   2  12 6.11869 5.36434   1
  -5   2  12 51.9496 5.40576   1
  -4   2  12 143.777 8.08147   1
  -3   2  12 196.987 9.07624   1
  -2   2  12 182.981 6.69554   1
  -1   2  12 81.9632 5.42179   1
   0   2  12 2.66560 3.68656   1
   1   2  12 432.880 10.0707   1
   2   2  12 168.484 7.41067   1
   3   2  12 4.90708 4.26731   1
   4   2  12 39.0407 5.57870   1
   5   2  12 17.2166 5.48103   1
   6   2  12 15.5925 4.90754   1
   7   2  12 11.2435 10.7933   1
  -9   3  12 8.60703 8.62623   1
  -8   3  12 -5.6374 7.07127   1
  -7   3  12 9.37878 5.93502   1
  -6   3  12 -0.6520 4.70386   1
  -5   3  12 11.9628 3.51565   1
  -4   3  12 7.47299 4.15583   1
  -3   3  12 25.3478 5.01366   1
  -2   3  12 67.0362 4.78424   1
  -1   3  12 16.4252 3.59485   1
   0   3  12 41.1073 4.32731   1
   1   3  12 1.99985 3.47471   1
   2   3  12 76.6600 5.74357   1
   3   3  12 -3.9062 4.59437   1
   4   3  12 13.2203 6.18692   1
   5   3  12 21.8008 6.55431   1
   6   3  12 0.44984 4.74516   1
  -9   4  12 27.3307 8.41250   1
  -8   4  12 11.6051 5.71826   1
  -7   4  12 33.5911 4.43398   1
  -6   4  12 60.7096 7.11429   1
  -5   4  12 28.9436 5.55866   1
  -4   4  12 5.13550 3.73524   1
  -3   4  12 26.3041 4.54281   1
  -2   4  12 87.3521 5.88243   1
  -1   4  12 5.81725 3.19853   1
   0   4  12 102.696 5.76949   1
   1   4  12 8.47407 4.04164   1
   2   4  12 0.70401 3.85163   1
   3   4  12 42.8185 6.34038   1
   4   4  12 61.5176 6.96476   1
   5   4  12 71.3989 8.77539   1
  -8   5  12 14.2737 7.51617   1
  -7   5  12 3.45990 5.20296   1
  -6   5  12 42.3151 6.69159   1
  -5   5  12 23.3472 5.44027   1
  -4   5  12 7.54323 4.14238   1
  -3   5  12 3.69030 3.82693   1
  -2   5  12 78.6500 5.26224   1
  -1   5  12 5.17266 3.48828   1
   0   5  12 -1.5884 4.26843   1
   1   5  12 11.3759 3.95253   1
   2   5  12 57.1490 5.70251   1
   3   5  12 23.6109 5.28588   1
   4   5  12 77.2115 7.27811   1
  -8   6  12 116.604 9.55584   1
  -7   6  12 -3.3506 5.53953   1
  -6   6  12 17.7246 4.98910   1
  -5   6  12 20.9433 5.06567   1
  -4   6  12 157.873 8.92439   1
  -3   6  12 51.3960 5.63065   1
  -2   6  12 92.7439 6.66429   1
  -1   6  12 310.153 10.6063   1
   0   6  12 113.359 7.35912   1
   1   6  12 80.0881 6.84361   1
   2   6  12 40.6433 6.20770   1
   3   6  12 121.966 9.52043   1
  -7   7  12 11.0709 6.46484   1
  -6   7  12 4.59149 5.24363   1
  -5   7  12 167.518 9.50408   1
  -4   7  12 53.6669 6.41330   1
  -3   7  12 113.665 6.83697   1
  -2   7  12 75.1954 6.69852   1
  -1   7  12 8.20960 4.42856   1
   0   7  12 173.733 8.72120   1
   1   7  12 1.93670 5.21357   1
   2   7  12 21.4596 5.59487   1
  -6   8  12 22.9430 6.47899   1
  -5   8  12 154.127 9.08910   1
  -4   8  12 6.66262 4.83713   1
  -3   8  12 7.18529 4.65505   1
  -2   8  12 51.4392 5.66688   1
  -1   8  12 44.2717 5.90950   1
   0   8  12 8.07381 5.42795   1
   0 -10  13 61.7142 7.82287   1
   1 -10  13 1.17337 5.94550   1
   2 -10  14 0.87996 31.6681  -2
   2 -10  13 0.87996 31.6681   1
   3 -10  14 -15.616 42.4153  -2
   3 -10  13 -15.616 42.4153   1
   4 -10  13 168.555 104.196  -2
   4 -10  13 168.555 104.196   1
  -2  -9  13 -14.226 6.79213   1
  -1  -9  14 36.8086 30.1991  -2
  -1  -9  13 36.8086 30.1991   1
   0  -9  14 36.9455 30.8228  -2
   0  -9  13 36.9455 30.8228   1
   1  -9  14 43.5928 22.2767  -2
   1  -9  13 43.5928 22.2767   1
   2  -9  13 10.9455 5.86819   1
   3  -9  13 34.2126 6.41867   1
   4  -9  13 188.776 64.5410  -2
   4  -9  13 188.776 64.5410   1
   5  -9  13 115.716 24.1787  -2
   5  -9  13 115.716 24.1787   1
   6  -9  13 26.0555 21.2836  -2
   6  -9  13 26.0555 21.2836   1
  -3  -8  14 18.0750 73.3029  -2
  -3  -8  13 18.0750 73.3029   1
  -2  -8  14 121.651 56.0878  -2
  -2  -8  13 121.651 56.0878   1
  -1  -8  14 35.1599 53.0426  -2
  -1  -8  13 35.1599 53.0426   1
   0  -8  14 38.5952 57.7121  -2
   0  -8  13 38.5952 57.7121   1
   1  -8  13 221.619 9.40749   1
   2  -8  13 4.86816 5.12477   1
   3  -8  13 19.3503 5.31314   1
   4  -8  13 -25.796 34.7710  -2
   4  -8  13 -25.796 34.7710   1
   5  -8  13 -7.3286 18.6525  -2
   5  -8  13 -7.3286 18.6525   1
   6  -8  13 241.896 23.7153  -2
   6  -8  13 241.896 23.7153   1
   7  -8  13 63.2340 26.3013  -2
   7  -8  13 63.2340 26.3013   1
  -4  -7  13 26.4371 6.81719   1
  -3  -7  13 17.7278 5.24284   1
  -2  -7  13 35.3061 6.02519   1
  -1  -7  14 188.532 67.4299  -2
  -1  -7  13 188.532 67.4299   1
   0  -7  13 102.553 7.04626   1
   1  -7  13 54.0325 5.60285   1
   2  -7  13 125.651 8.15383   1
   3  -7  13 151.924 52.7516  -2
   3  -7  13 151.924 52.7516   1
   4  -7  13 -19.153 32.8517  -2
   4  -7  13 -19.153 32.8517   1
   5  -7  13 124.336 34.3952  -2
   5  -7  13 124.336 34.3952   1
   6  -7  13 -30.403 25.1711  -2
   6  -7  13 -30.403 25.1711   1
   7  -7  13 99.4372 27.5109  -2
   7  -7  13 99.4372 27.5109   1
  -5  -6  13 48.2011 7.60066   1
  -4  -6  13 107.489 8.88564   1
  -3  -6  13 198.947 10.9016   1
  -2  -6  13 44.5901 5.80980   1
  -1  -6  13 0.99072 3.06642   1
   0  -6  13 78.5318 6.69368   1
   1  -6  13 74.1268 6.31637   1
   2  -6  13 49.6667 6.15981   1
   3  -6  13 1.66942 3.93584   1
   4  -6  13 -2.1120 5.33759   1
   5  -6  13 534.713 91.5902  -2
   5  -6  13 534.713 91.5902   1
   6  -6  13 244.221 83.0086  -2
   6  -6  13 244.221 83.0086   1
   7  -6  13 45.6511 7.23212   1
   8  -6  13 70.7534 9.72678   1
  -6  -5  13 2.54395 6.12355   1
  -5  -5  13 17.9159 7.43968   1
  -4  -5  13 65.4896 7.57388   1
  -3  -5  13 121.492 8.97185   1
  -2  -5  13 92.8915 7.37365   1
  -1  -5  13 22.2857 5.22769   1
   0  -5  13 147.241 6.96152   1
   1  -5  13 8.30107 3.58489   1
   2  -5  13 74.0220 5.36062   1
   3  -5  13 207.980 9.19586   1
   4  -5  13 -29.985 61.3111  -2
   4  -5  13 -29.985 61.3111   1
   5  -5  13 54.3305 7.10843   1
   6  -5  13 420.974 13.8690   1
   7  -5  13 28.2414 6.12634   1
   8  -5  13 85.7523 9.96985   1
  -7  -4  13 -7.7983 8.14840   1
  -6  -4  13 12.4002 7.73597   1
  -5  -4  13 176.887 10.6294   1
  -4  -4  13 9.11753 5.38713   1
  -3  -4  13 7.34553 4.07994   1
  -2  -4  13 4.76305 4.51310   1
  -1  -4  13 9.49672 4.45421   1
   0  -4  13 8.29959 4.40944   1
   1  -4  13 18.9268 4.21828   1
   2  -4  13 19.9337 4.25166   1
   3  -4  13 196.144 9.29609   1
   4  -4  13 98.7113 7.38385   1
   5  -4  13 1.54122 3.91888   1
   6  -4  13 140.744 9.48070   1
   7  -4  13 49.8285 7.21251   1
   8  -4  12 -42.929 65.8943  -2
   8  -4  13 -42.929 65.8943   1
  -7  -3  13 65.3316 9.50539   1
  -6  -3  13 41.4925 7.51490   1
  -5  -3  13 158.395 10.3509   1
  -4  -3  13 34.4054 5.88818   1
  -3  -3  13 165.698 8.02981   1
  -2  -3  13 93.1434 6.65433   1
  -1  -3  13 12.2321 4.60649   1
   0  -3  13 294.418 10.2513   1
   1  -3  13 63.5692 5.38273   1
   2  -3  13 643.794 15.0717   1
   3  -3  13 201.286 8.40424   1
   4  -3  13 15.5309 4.71933   1
   5  -3  13 6.57351 4.38476   1
   6  -3  13 115.880 8.72101   1
   7  -3  13 26.2055 6.65239   1
   8  -3  13 5.49887 8.99449   1
  -8  -2  13 45.6465 8.30166   1
  -7  -2  13 38.4257 8.55949   1
  -6  -2  13 -4.6782 7.25179   1
  -5  -2  13 53.9413 7.85713   1
  -4  -2  13 6.28939 4.03109   1
  -3  -2  13 11.2995 4.09340   1
  -2  -2  13 7.69207 3.77312   1
  -1  -2  13 189.586 8.95309   1
   0  -2  13 58.3323 4.47480   1
   1  -2  13 144.407 6.91131   1
   2  -2  13 4.91968 3.79990   1
   3  -2  13 255.650 9.44967   1
   4  -2  13 2.78738 4.75256   1
   5  -2  13 25.2420 4.98363   1
   6  -2  13 15.0115 5.60780   1
   7  -2  13 23.4358 7.12662   1
   8  -2  13 8.53587 8.55013   1
  -8  -1  13 18.6229 6.69199   1
  -7  -1  13 15.1628 7.71739   1
  -6  -1  13 44.4312 8.28842   1
  -5  -1  13 11.8575 5.59166   1
  -4  -1  13 48.9399 6.52976   1
  -3  -1  13 -6.2892 4.32656   1
  -2  -1  13 78.5388 5.68128   1
  -1  -1  13 -0.1983 3.69022   1
   0  -1  13 -3.8739 3.30036   1
   1  -1  13 10.3742 2.82381   1
   2  -1  13 20.7500 4.91172   1
   3  -1  13 67.4286 5.25128   1
   4  -1  13 1.58659 5.08949   1
   5  -1  13 14.9014 5.07583   1
   6  -1  13 86.6247 7.74734   1
   7  -1  13 5.78881 6.65820   1
  -8   0  13 59.1284 9.15085   1
  -7   0  13 177.656 11.8492   1
  -6   0  13 279.762 12.5721   1
  -5   0  13 -0.9708 4.41768   1
  -4   0  13 35.8578 6.14146   1
  -3   0  13 13.7185 4.87420   1
  -2   0  13 30.4089 5.36995   1
  -1   0  13 271.063 8.69921   1
   0   0  13 330.322 9.45029   1
   1   0  13 371.620 11.8693   1
   2   0  13 307.319 10.5077   1
   3   0  13 79.8165 6.36444   1
   4   0  13 167.608 7.45596   1
   5   0  13 61.5829 6.56029   1
   6   0  13 43.2135 8.44098   1
   7   0  13 96.0266 10.2230   1
  -8   1  13 10.9513 8.27165   1
  -7   1  13 9.33721 7.49578   1
  -6   1  13 34.4941 6.29505   1
  -5   1  13 39.6442 5.43051   1
  -4   1  13 14.8386 4.69328   1
  -3   1  13 -1.2456 4.25221   1
  -2   1  13 4.15297 3.14526   1
  -1   1  13 -0.4429 3.20025   1
   0   1  13 241.412 7.88839   1
   1   1  13 193.347 9.57949   1
   2   1  13 3.48997 3.96914   1
   3   1  13 156.651 8.47917   1
   4   1  13 130.704 8.74054   1
   5   1  13 78.9193 8.29469   1
   6   1  13 95.0075 8.63936   1
   7   1  13 279.105 15.2046   1
  -9   2  13 -4.9666 9.91099   1
  -8   2  13 10.8022 7.61551   1
  -7   2  13 14.7559 6.70590   1
  -6   2  13 163.438 9.93920   1
  -5   2  13 70.3574 5.99345   1
  -4   2  13 120.458 8.04000   1
  -3   2  13 3.88708 4.32340   1
  -2   2  13 439.153 10.7791   1
  -1   2  13 1.38837 3.45099   1
   0   2  13 33.0300 4.91512   1
   1   2  13 8.37490 4.03507   1
   2   2  13 5.83830 3.80595   1
   3   2  13 64.4161 5.61178   1
   4   2  13 -4.6039 4.43325   1
   5   2  13 226.626 9.38037   1
   6   2  13 80.7952 10.9668   1
  -8   3  13 -0.2105 6.29024   1
  -7   3  13 10.8208 5.37673   1
  -6   3  13 67.4933 7.48381   1
  -5   3  13 172.689 10.1536   1
  -4   3  13 30.7198 5.14774   1
  -3   3  13 0.71266 4.34099   1
  -2   3  13 52.3755 5.28022   1
  -1   3  13 188.307 8.11329   1
   0   3  13 41.4815 4.85695   1
   1   3  13 130.502 6.95633   1
   2   3  13 17.8476 4.00816   1
   3   3  13 134.239 8.91047   1
   4   3  13 29.7498 6.79536   1
   5   3  13 73.1532 8.69626   1
   6   3  13 13.7705 20.1519   1
  -8   4  13 45.9844 6.94783   1
  -7   4  13 10.5017 6.26931   1
  -6   4  13 368.184 13.9111   1
  -5   4  13 -1.4692 4.86649   1
  -4   4  13 0.90591 4.48488   1
  -3   4  13 89.5719 7.52318   1
  -2   4  13 4.53655 3.90109   1
  -1   4  13 108.813 6.32800   1
   0   4  13 13.3646 4.49958   1
   1   4  13 77.3435 6.13046   1
   2   4  13 4.56352 4.13513   1
   3   4  13 26.2695 5.55024   1
   4   4  13 14.9066 6.00612   1
   5   4  13 13.9729 7.95124   1
  -8   5  13 32.4582 8.43122   1
  -7   5  13 11.7206 5.80403   1
  -6   5  13 135.959 8.87845   1
  -5   5  13 154.446 9.38819   1
  -4   5  13 63.2652 5.78253   1
  -3   5  13 4.90334 3.94846   1
  -2   5  13 1.42501 3.82809   1
  -1   5  13 53.8501 4.73633   1
   0   5  13 49.0876 5.46976   1
   1   5  13 12.4250 4.78721   1
   2   5  13 2.07205 4.37945   1
   3   5  13 7.04278 5.42326   1
   4   5  13 26.6683 6.51389   1
  -7   6  13 43.2446 6.52750   1
  -6   6  13 28.5627 5.88495   1
  -5   6  13 237.649 11.5490   1
  -4   6  13 5.32543 4.91275   1
  -3   6  13 -1.3097 4.48410   1
  -2   6  13 11.9144 4.74634   1
  -1   6  13 24.4504 4.89952   1
   0   6  13 338.236 11.7338   1
   1   6  13 7.73919 5.05224   1
   2   6  13 5.36128 5.02123   1
   3   6  13 193.185 11.1116   1
  -7   7  13 9.04274 8.08246   1
  -6   7  13 7.24407 5.84983   1
  -5   7  13 18.6680 5.50511   1
  -4   7  13 10.1864 4.90969   1
  -3   7  13 10.6313 4.87588   1
  -2   7  13 18.2403 4.67367   1
  -1   7  13 31.9684 5.44336   1
   0   7  13 101.915 7.71130   1
   1   7  13 76.0006 6.92197   1
  -5   8  13 4.46572 5.44961   1
  -4   8  13 -0.6143 6.29875   1
  -3   8  13 73.4809 7.03107   1
  -2   8  13 7.56090 5.01947   1
  -1   8  13 61.1036 6.29876   1
   1 -10  14 -35.186 34.8768   1
   2 -10  14 4.50892 6.14547   1
   3 -10  14 12.1591 7.09796   1
  -1  -9  15 79.9726 71.8673  -2
  -1  -9  14 79.9726 71.8673   1
   0  -9  15 48.2559 32.4992  -2
   0  -9  14 48.2559 32.4992   1
   1  -9  15 -12.566 57.6212  -2
   1  -9  14 -12.566 57.6212   1
   2  -9  15 58.0092 59.1193  -2
   2  -9  14 58.0092 59.1193   1
   3  -9  14 12.8236 5.79078   1
   4  -9  14 13.3818 5.20199   1
   5  -9  14 -23.524 36.4652  -2
   5  -9  14 -23.524 36.4652   1
  -3  -8  14 83.7665 7.09197   1
  -2  -8  15 138.740 78.8295  -2
  -2  -8  14 138.740 78.8295   1
  -1  -8  15 1.97889 46.8899  -2
  -1  -8  14 1.97889 46.8899   1
   0  -8  15 -37.244 53.5726  -2
   0  -8  14 -37.244 53.5726   1
   1  -8  14 1.72288 5.07623   1
   2  -8  14 9.45247 5.10254   1
   3  -8  14 -4.2681 5.28184   1
   4  -8  14 99.5065 8.28696   1
   5  -8  14 261.254 31.6658  -2
   5  -8  14 261.254 31.6658   1
   6  -8  14 112.784 28.7134  -2
   6  -8  14 112.784 28.7134   1
  -4  -7  14 27.3197 7.27653   1
  -3  -7  14 468.822 12.4854   1
  -2  -7  14 14.1055 5.67405   1
  -1  -7  14 3.74683 5.50272   1
   0  -7  14 12.7542 5.02709   1
   1  -7  14 15.1602 4.93635   1
   2  -7  14 106.769 8.58899   1
   3  -7  14 18.7642 4.76482   1
   4  -7  14 54.6569 64.1422  -2
   4  -7  14 54.6569 64.1422   1
   5  -7  14 205.289 31.2280  -2
   5  -7  14 205.289 31.2280   1
   6  -7  14 109.428 27.0373  -2
   6  -7  14 109.428 27.0373   1
   7  -7  14 13.3915 38.8819  -2
   7  -7  14 13.3915 38.8819   1
  -5  -6  14 18.6056 6.94468   1
  -4  -6  14 36.5418 6.81123   1
  -3  -6  14 53.5448 5.30527   1
  -2  -6  14 380.492 13.1927   1
  -1  -6  14 108.594 5.71964   1
   0  -6  14 46.0941 5.74445   1
   1  -6  14 113.402 7.61205   1
   2  -6  14 23.7286 5.24901   1
   3  -6  14 86.6897 6.79223   1
   4  -6  14 5.89040 5.95709   1
   5  -6  14 22.0910 70.4011  -2
   5  -6  14 22.0910 70.4011   1
   6  -6  14 22.3011 6.47403   1
   7  -6  14 9.66853 7.97126   1
  -6  -5  14 14.3299 7.58571   1
  -5  -5  14 85.7930 8.99110   1
  -4  -5  14 7.58827 5.64443   1
  -3  -5  14 113.809 9.06710   1
  -2  -5  14 5.39143 4.92387   1
  -1  -5  14 11.8458 4.92542   1
   0  -5  14 91.5420 6.89484   1
   1  -5  14 7.39759 3.86019   1
   2  -5  14 55.6215 5.90951   1
   3  -5  14 0.85454 4.52313   1
   4  -5  14 96.5732 67.6974  -2
   4  -5  14 96.5732 67.6974   1
   5  -5  14 87.4136 74.7322  -2
   5  -5  14 87.4136 74.7322   1
   6  -5  14 12.4198 3.82373   1
   7  -5  14 31.1228 6.23765   1
  -7  -4  14 40.6993 14.3302   1
  -6  -4  14 6.01484 6.75499   1
  -5  -4  14 24.8664 6.59014   1
  -4  -4  14 6.74605 5.80264   1
  -3  -4  14 120.750 7.93877   1
  -2  -4  14 5.09227 4.20595   1
  -1  -4  14 5.80066 4.83496   1
   0  -4  14 274.755 10.9627   1
   1  -4  14 28.4374 4.76652   1
   2  -4  14 31.6867 5.20063   1
   3  -4  14 13.0875 5.17338   1
   4  -4  14 103.539 8.27311   1
   5  -4  14 19.2602 6.14524   1
   6  -4  14 3.47560 3.94259   1
   7  -4  14 43.8501 7.20735   1
  -7  -3  14 3.39860 7.70296   1
  -6  -3  14 105.161 11.4009   1
  -5  -3  14 8.15174 6.28326   1
  -4  -3  14 25.4415 5.60134   1
  -3  -3  14 5.02552 4.56798   1
  -2  -3  14 3.42322 4.03152   1
  -1  -3  14 83.9068 7.31423   1
   0  -3  14 329.380 9.35999   1
   1  -3  14 29.1054 3.95843   1
   2  -3  14 428.177 11.6400   1
   3  -3  14 11.5754 4.24742   1
   4  -3  14 3.35838 4.82968   1
   5  -3  14 52.7083 7.08253   1
   6  -3  14 99.9233 7.83042   1
   7  -3  14 84.6523 8.55778   1
  -7  -2  14 152.660 11.5818   1
  -6  -2  14 -4.5053 7.60553   1
  -5  -2  14 19.8229 6.11169   1
  -4  -2  14 136.852 8.91771   1
  -3  -2  14 102.651 6.84343   1
  -2  -2  14 369.880 10.9047   1
  -1  -2  14 424.430 12.4456   1
   0  -2  14 -2.3154 3.90038   1
   1  -2  14 35.1329 4.81684   1
   2  -2  14 113.548 6.94257   1
   3  -2  14 -1.0299 3.99416   1
   4  -2  14 102.388 6.92841   1
   5  -2  14 75.1465 7.90990   1
   6  -2  14 14.3261 5.44309   1
   7  -2  14 20.4505 6.93987   1
  -8  -1  14 115.579 12.5266   1
  -7  -1  14 108.951 9.89213   1
  -6  -1  14 2.45026 6.00362   1
  -5  -1  14 78.3812 7.47974   1
  -4  -1  14 4.20010 5.14838   1
  -3  -1  14 47.3029 5.82312   1
  -2  -1  14 597.612 15.7298   1
  -1  -1  14 570.889 13.4213   1
   0  -1  14 8.13051 4.02145   1
   1  -1  14 12.1847 4.46454   1
   2  -1  14 51.8777 5.89419   1
   3  -1  14 2.27678 4.13255   1
   4  -1  14 27.7187 5.08816   1
   5  -1  14 25.2272 5.92119   1
   6  -1  14 6.06780 4.61093   1
   7  -1  14 14.5796 6.85465   1
  -8   0  14 14.8043 7.62565   1
  -7   0  14 25.1231 7.57036   1
  -6   0  14 -1.2389 5.98626   1
  -5   0  14 84.9442 7.14140   1
  -4   0  14 176.839 10.0076   1
  -3   0  14 37.4907 5.94937   1
  -2   0  14 9.31796 4.53472   1
  -1   0  14 -0.4313 3.70355   1
   0   0  14 173.308 7.85648   1
   1   0  14 433.885 12.4918   1
   2   0  14 536.665 13.8643   1
   3   0  14 114.407 7.39207   1
   4   0  14 170.574 9.68622   1
   5   0  14 15.2344 4.39115   1
   6   0  14 13.7526 5.70629   1
   7   0  14 5.85351 8.19271   1
  -8   1  14 5.86372 7.25058   1
  -7   1  14 21.9457 7.30987   1
  -6   1  14 -0.7124 5.60855   1
  -5   1  14 20.2697 5.71581   1
  -4   1  14 88.0043 8.10668   1
  -3   1  14 5.84423 5.48953   1
  -2   1  14 0.43295 3.32053   1
  -1   1  14 289.087 9.11329   1
   0   1  14 -2.2029 3.14767   1
   1   1  14 32.9581 5.63084   1
   2   1  14 89.3447 6.30717   1
   3   1  14 143.690 9.09431   1
   4   1  14 -1.3198 5.55695   1
   5   1  14 14.8930 6.42631   1
   6   1  14 25.3023 7.81024   1
  -8   2  14 16.3860 6.26119   1
  -7   2  14 -3.0235 6.64020   1
  -6   2  14 44.0136 7.39844   1
  -5   2  14 158.180 9.56111   1
  -4   2  14 119.261 8.67011   1
  -3   2  14 24.3347 4.68112   1
  -2   2  14 56.1158 5.30220   1
  -1   2  14 391.811 9.95608   1
   0   2  14 18.2844 4.32459   1
   1   2  14 8.46275 4.50776   1
   2   2  14 6.36274 4.16306   1
   3   2  14 8.56217 4.22593   1
   4   2  14 292.213 13.1900   1
   5   2  14 -1.7950 6.63313   1
   6   2  14 -1.2538 8.76819   1
  -8   3  14 4.88311 5.71279   1
  -7   3  14 36.2556 6.16286   1
  -6   3  14 247.505 11.7499   1
  -5   3  14 53.5928 7.22258   1
  -4   3  14 143.505 8.24687   1
  -3   3  14 46.9304 5.42993   1
  -2   3  14 16.6702 4.89485   1
  -1   3  14 385.503 10.5480   1
   0   3  14 154.320 8.00008   1
   1   3  14 23.9690 4.52654   1
   2   3  14 9.22219 3.83593   1
   3   3  14 3.84450 5.12597   1
   4   3  14 39.0638 7.16304   1
   5   3  14 23.5845 6.42359   1
  -8   4  14 -11.282 7.82275   1
  -7   4  14 32.7450 7.09988   1
  -6   4  14 136.154 9.44682   1
  -5   4  14 408.563 15.0476   1
  -4   4  14 57.0422 6.85547   1
  -3   4  14 196.336 8.93464   1
  -2   4  14 3.37674 4.10261   1
  -1   4  14 118.267 6.32424   1
   0   4  14 299.089 10.8462   1
   1   4  14 0.91138 4.88280   1
   2   4  14 9.04492 4.40191   1
   3   4  14 25.9256 6.15695   1
   4   4  14 25.8829 6.86111   1
  -8   5  14 70.8669 37.6086   1
  -7   5  14 29.0544 7.23090   1
  -6   5  14 9.53182 6.01834   1
  -5   5  14 4.47953 5.48442   1
  -4   5  14 99.5244 7.66911   1
  -3   5  14 8.87273 4.47183   1
  -2   5  14 84.1846 6.02044   1
  -1   5  14 166.138 7.03732   1
   0   5  14 19.7244 4.75447   1
   1   5  14 72.4376 6.49288   1
   2   5  14 18.0957 5.33581   1
   3   5  14 4.87770 5.58191   1
  -7   6  14 -4.6596 6.05853   1
  -6   6  14 7.66978 5.61050   1
  -5   6  14 13.3863 5.82285   1
  -4   6  14 9.05734 5.31486   1
  -3   6  14 253.028 10.8770   1
  -2   6  14 117.793 7.61863   1
  -1   6  14 191.512 8.93541   1
   0   6  14 132.644 8.75871   1
   1   6  14 3.78505 5.26127   1
   2   6  14 57.6599 7.84269   1
  -6   7  14 4.17875 6.23595   1
  -5   7  14 9.31799 6.20414   1
  -4   7  14 26.8090 5.86843   1
  -3   7  14 86.5582 7.22053   1
  -2   7  14 15.3499 5.30053   1
  -1   7  14 28.7003 5.52034   1
   0   7  14 58.8287 6.49235   1
  -3   8  14 4.20303 12.7281   1
  -1  -9  15 77.5551 8.87665   1
   0  -9  16 16.3200 60.4791  -2
   0  -9  15 16.3200 60.4791   1
   1  -9  15 14.3740 6.18336   1
   2  -9  15 25.6703 6.46170   1
   3  -9  15 97.6860 7.14851   1
   4  -9  15 12.2265 6.04366   1
  -2  -8  15 29.5541 6.37830   1
  -1  -8  15 78.1425 7.86038   1
   0  -8  15 10.9139 5.09734   1
   1  -8  15 47.3697 6.04708   1
   2  -8  15 61.8953 6.32997   1
   3  -8  15 64.9428 7.31566   1
   4  -8  15 91.4178 73.5102  -2
   4  -8  15 91.4178 73.5102   1
   5  -8  15 84.0011 61.1736  -2
   5  -8  15 84.0011 61.1736   1
   6  -8  15 102.967 47.3028  -2
   6  -8  15 102.967 47.3028   1
  -4  -7  15 11.2213 5.95251   1
  -3  -7  15 129.798 9.22028   1
  -2  -7  15 8.77136 5.05211   1
  -1  -7  15 141.775 9.47281   1
   0  -7  15 2.78048 4.51045   1
   1  -7  15 146.804 9.62377   1
   2  -7  15 198.802 9.86358   1
   3  -7  15 15.1389 4.85455   1
   4  -7  15 18.8689 5.87655   1
   5  -7  15 3.07864 6.58866   1
   6  -7  15 -38.051 52.6420  -2
   6  -7  15 -38.051 52.6420   1
  -5  -6  15 92.1628 10.0298   1
  -4  -6  15 8.11869 6.34658   1
  -3  -6  15 24.5932 6.55952   1
  -2  -6  15 97.5867 7.94372   1
  -1  -6  15 15.6544 4.12679   1
   0  -6  15 74.3078 6.72610   1
   1  -6  15 39.9891 6.08505   1
   2  -6  15 6.23635 4.82542   1
   3  -6  15 12.9410 5.23694   1
   4  -6  15 0.49834 5.28013   1
   5  -6  15 35.8204 7.81915   1
   6  -6  15 -21.251 81.8754  -2
   6  -6  15 -21.251 81.8754   1
   7  -6  15 50.7889 8.55693   1
  -6  -5  15 34.6056 11.8273   1
  -5  -5  15 48.6381 6.93876   1
  -4  -5  15 9.84554 4.76109   1
  -3  -5  15 6.17101 5.53468   1
  -2  -5  15 9.82131 5.68275   1
  -1  -5  15 -8.5928 4.68905   1
   0  -5  15 74.2019 6.04380   1
   1  -5  15 150.751 8.14294   1
   2  -5  15 20.1554 5.14398   1
   3  -5  15 48.7770 6.52104   1
   4  -5  15 11.3028 5.97187   1
   5  -5  15 2.56574 5.78927   1
   6  -5  15 43.7496 6.23701   1
   7  -5  15 0.20177 4.82625   1
  -6  -4  15 6.23387 6.78900   1
  -5  -4  15 5.57680 6.26166   1
  -4  -4  15 17.0234 5.28561   1
  -3  -4  15 46.6838 6.55868   1
  -2  -4  15 41.5535 6.60781   1
  -1  -4  15 20.1035 5.34369   1
   0  -4  15 8.68269 5.31285   1
   1  -4  15 138.552 7.80584   1
   2  -4  15 18.5279 5.17286   1
   3  -4  15 17.1030 4.51979   1
   4  -4  15 40.8452 6.76495   1
   5  -4  15 85.3196 8.99466   1
   6  -4  15 48.0277 6.37204   1
   7  -4  15 -0.4108 5.85284   1
  -7  -3  15 0.38663 8.45457   1
  -6  -3  15 -8.1151 6.53545   1
  -5  -3  15 13.0210 5.86727   1
  -4  -3  15 1.53589 4.65283   1
  -3  -3  15 114.501 8.78759   1
  -2  -3  15 100.506 7.73691   1
  -1  -3  15 0.97486 4.92003   1
   0  -3  15 7.16500 4.88739   1
   1  -3  15 24.8060 4.22099   1
   2  -3  15 74.4838 6.28632   1
   3  -3  15 55.8144 6.58270   1
   4  -3  15 4.88813 5.72123   1
   5  -3  15 -2.7703 5.80593   1
   6  -3  15 5.59732 4.98135   1
   7  -3  15 11.5777 6.63391   1
  -7  -2  15 42.1946 9.14302   1
  -6  -2  15 2.27379 6.48858   1
  -5  -2  15 1.95548 5.26633   1
  -4  -2  15 15.3848 5.01634   1
  -3  -2  15 8.53637 4.55220   1
  -2  -2  15 -3.1892 4.48222   1
  -1  -2  15 36.9411 5.88773   1
   0  -2  15 58.3229 6.18353   1
   1  -2  15 6.40508 4.37196   1
   2  -2  15 79.2792 6.22924   1
   3  -2  15 217.209 9.32532   1
   4  -2  15 267.838 11.7095   1
   5  -2  15 9.13723 5.19790   1
   6  -2  15 11.7771 5.86331   1
   7  -2  15 -12.536 6.95986   1
  -7  -1  15 171.248 11.8931   1
  -6  -1  15 18.9234 6.25378   1
  -5  -1  15 12.7369 5.27509   1
  -4  -1  15 87.3358 8.05008   1
  -3  -1  15 104.152 7.38847   1
  -2  -1  15 229.737 11.0269   1
  -1  -1  15 298.282 10.8490   1
   0  -1  15 333.315 10.2386   1
   1  -1  15 112.875 8.31189   1
   2  -1  15 0.67412 4.68578   1
   3  -1  15 27.6987 5.61010   1
   4  -1  15 -2.2854 4.24001   1
   5  -1  15 2.70589 5.28059   1
   6  -1  15 36.7895 7.05342   1
   7  -1  15 -4.8692 7.97210   1
  -8   0  15 10.9424 8.04058   1
  -7   0  15 7.07832 6.29619   1
  -6   0  15 20.1442 6.42666   1
  -5   0  15 11.1849 5.77736   1
  -4   0  15 28.5378 6.65638   1
  -3   0  15 6.74106 3.70485   1
  -2   0  15 -1.5731 4.89312   1
  -1   0  15 116.034 6.85996   1
   0   0  15 20.1624 4.24824   1
   1   0  15 34.5588 5.87248   1
   2   0  15 231.317 10.9531   1
   3   0  15 2.50281 4.54196   1
   4   0  15 248.065 11.8842   1
   5   0  15 13.6866 6.12687   1
   6   0  15 48.4010 9.18165   1
  -8   1  15 37.6869 9.29192   1
  -7   1  15 -4.9346 6.58637   1
  -6   1  15 107.300 8.99344   1
  -5   1  15 257.576 12.0446   1
  -4   1  15 76.2490 7.95052   1
  -3   1  15 5.73233 5.04627   1
  -2   1  15 11.7334 5.15005   1
  -1   1  15 53.7217 5.31197   1
   0   1  15 155.443 8.28607   1
   1   1  15 113.634 7.86817   1
   2   1  15 43.0766 5.33833   1
   3   1  15 14.8272 5.76875   1
   4   1  15 276.674 12.8107   1
   5   1  15 -0.8566 6.22745   1
   6   1  15 3.93879 8.13562   1
  -8   2  15 21.9275 7.21585   1
  -7   2  15 -1.8021 6.92371   1
  -6   2  15 71.5145 6.75207   1
  -5   2  15 8.74447 5.79710   1
  -4   2  15 35.2287 6.76209   1
  -3   2  15 26.6967 5.97093   1
  -2   2  15 92.4211 6.39841   1
  -1   2  15 404.348 10.9368   1
   0   2  15 43.8216 5.69210   1
   1   2  15 108.945 7.54778   1
   2   2  15 195.538 8.55893   1
   3   2  15 113.339 7.93594   1
   4   2  15 27.3155 6.65125   1
   5   2  15 94.0168 10.5384   1
  -8   3  15 0.30697 6.64383   1
  -7   3  15 1.37576 6.20052   1
  -6   3  15 15.2361 6.81851   1
  -5   3  15 86.9704 7.02293   1
  -4   3  15 12.4626 6.91141   1
  -3   3  15 51.9669 6.67073   1
  -2   3  15 -9.6344 4.45165   1
  -1   3  15 226.870 8.05750   1
   0   3  15 235.063 9.47120   1
   1   3  15 158.219 8.60051   1
   2   3  15 0.19092 4.42642   1
   3   3  15 71.4687 8.21016   1
   4   3  15 3.15585 6.49839   1
   5   3  15 90.4099 10.1837   1
  -7   4  15 58.1784 8.45887   1
  -6   4  15 192.848 11.3245   1
  -5   4  15 105.155 8.82987   1
  -4   4  15 12.7085 5.62312   1
  -3   4  15 16.8412 6.49856   1
  -2   4  15 33.0108 5.37085   1
  -1   4  15 -7.4454 3.11490   1
   0   4  15 19.1338 5.41526   1
   1   4  15 10.7637 5.19698   1
   2   4  15 75.7047 7.19292   1
   3   4  15 12.2302 5.76944   1
   4   4  15 14.3243 7.12416   1
  -7   5  15 -7.5894 6.96931   1
  -6   5  15 106.557 9.06298   1
  -5   5  15 25.3224 6.23186   1
  -4   5  15 8.12864 5.34276   1
  -3   5  15 20.3607 5.32172   1
  -2   5  15 2.00238 4.05980   1
  -1   5  15 99.4845 6.67317   1
   0   5  15 258.057 12.0224   1
   1   5  15 14.2506 4.72441   1
   2   5  15 23.4192 5.97590   1
   3   5  15 46.3806 6.53148   1
  -6   6  15 47.1645 6.92165   1
  -5   6  15 3.50568 5.23127   1
  -4   6  15 162.839 8.94312   1
  -3   6  15 159.217 8.71581   1
  -2   6  15 -2.9347 4.82491   1
  -1   6  15 80.2610 6.87986   1
   0   6  15 247.255 10.4250   1
   1   6  15 10.2786 5.94333   1
  -5   7  15 -0.0558 6.41573   1
  -4   7  15 22.6239 6.26597   1
  -3   7  15 11.2651 5.41269   1
  -2   7  15 8.32897 5.45433   1
  -1   7  15 -0.5575 5.53054   1
   0  -9  16 1.62823 5.77649   1
   1  -9  16 13.7199 5.54737   1
   2  -9  16 5.25284 5.58883   1
   3  -9  16 -2.0376 5.54881   1
  -2  -8  16 10.9447 6.50033   1
  -1  -8  16 5.21098 5.61818   1
   0  -8  16 16.6404 5.84171   1
   1  -8  16 30.5674 6.44749   1
   2  -8  16 18.0451 5.62209   1
   3  -8  16 1.17561 6.17599   1
   4  -8  16 18.7629 5.51334   1
   5  -8  16 129.183 64.6006  -2
   5  -8  16 129.183 64.6006   1
  -3  -7  16 203.263 11.1329   1
  -2  -7  16 43.5902 7.39487   1
  -1  -7  16 61.3175 7.82268   1
   0  -7  16 47.6516 6.57984   1
   1  -7  16 18.0262 7.40062   1
   2  -7  16 174.227 10.0826   1
   3  -7  16 7.14666 5.25817   1
   4  -7  16 7.73124 5.79806   1
   5  -7  16 27.9536 6.74175   1
   6  -7  16 11.1930 8.87533   1
  -4  -6  16 9.78235 6.36675   1
  -3  -6  16 39.7463 7.44178   1
  -2  -6  16 44.9416 6.92177   1
  -1  -6  16 10.3532 5.01636   1
   0  -6  16 20.9385 5.97963   1
   1  -6  16 6.16353 6.26337   1
   2  -6  16 111.474 8.32008   1
   3  -6  16 240.265 9.43794   1
   4  -6  16 14.3440 6.38581   1
   5  -6  16 31.6262 7.11508   1
   6  -6  16 19.3301 7.48961   1
  -5  -5  16 24.3300 7.43586   1
  -4  -5  16 18.4998 6.24953   1
  -3  -5  16 20.1499 5.46111   1
  -2  -5  16 4.79988 5.60739   1
  -1  -5  16 7.57219 5.16292   1
   0  -5  16 21.5277 4.12694   1
   1  -5  16 -1.8005 4.90481   1
   2  -5  16 82.7448 7.12539   1
   3  -5  16 63.6960 7.51472   1
   4  -5  16 85.0883 8.64156   1
   5  -5  16 12.4840 7.37019   1
   6  -5  16 17.9146 7.34647   1
  -6  -4  16 27.2909 9.57868   1
  -5  -4  16 14.9413 6.61905   1
  -4  -4  16 5.18918 6.09068   1
  -3  -4  16 4.34177 5.25890   1
  -2  -4  16 23.5635 5.92499   1
  -1  -4  16 1.28985 5.04199   1
   0  -4  16 19.0004 5.43636   1
   1  -4  16 2.69994 5.34582   1
   2  -4  16 9.23288 4.93916   1
   3  -4  16 94.0717 7.32859   1
   4  -4  16 2.02892 5.60530   1
   5  -4  16 16.1375 6.96464   1
   6  -4  16 8.11328 5.31295   1
   7  -4  16 -0.9923 7.19736   1
  -6  -3  16 27.8534 7.13845   1
  -5  -3  16 25.2754 6.26612   1
  -4  -3  16 13.7029 5.73951   1
  -3  -3  16 20.1236 5.84646   1
  -2  -3  16 78.0736 7.46164   1
  -1  -3  16 3.59251 5.07608   1
   0  -3  16 73.6699 6.87924   1
   1  -3  16 56.4724 5.44475   1
   2  -3  16 29.4966 5.73391   1
   3  -3  16 9.46990 4.84198   1
   4  -3  16 -2.4348 6.32921   1
   5  -3  16 176.888 11.3747   1
   6  -3  16 26.2138 5.30457   1
   7  -3  16 61.2515 14.5481   1
  -7  -2  16 215.249 13.3289   1
  -6  -2  16 40.5237 7.52732   1
  -5  -2  16 0.92457 5.05541   1
  -4  -2  16 32.8930 7.06367   1
  -3  -2  16 63.4287 7.53936   1
  -2  -2  16 274.945 11.4397   1
  -1  -2  16 502.580 13.7427   1
   0  -2  16 128.907 8.25682   1
   1  -2  16 62.9076 6.44688   1
   2  -2  16 6.21310 4.15643   1
   3  -2  16 0.01611 5.35005   1
   4  -2  16 105.680 9.07608   1
   5  -2  16 23.1991 5.13080   1
   6  -2  16 4.69995 4.94642   1
  -7  -1  16 112.605 9.97956   1
  -6  -1  16 1.62844 6.15997   1
  -5  -1  16 35.2372 7.12735   1
  -4  -1  16 167.041 9.28936   1
  -3  -1  16 37.6217 5.81394   1
  -2  -1  16 106.793 8.78083   1
  -1  -1  16 269.967 11.0381   1
   0  -1  16 78.7033 6.66475   1
   1  -1  16 -1.7659 4.10561   1
   2  -1  16 122.890 6.99238   1
   3  -1  16 63.2101 8.15292   1
   4  -1  16 414.603 16.9397   1
   5  -1  16 3.48163 4.42913   1
   6  -1  16 15.0630 6.50055   1
  -7   0  16 0.82567 6.65233   1
  -6   0  16 72.3099 8.20542   1
  -5   0  16 23.5181 6.91737   1
  -4   0  16 106.987 8.96117   1
  -3   0  16 5.63045 5.31534   1
  -2   0  16 109.362 7.96228   1
  -1   0  16 203.994 8.69500   1
   0   0  16 479.459 12.1122   1
   1   0  16 32.9012 5.87343   1
   2   0  16 1.42550 5.23794   1
   3   0  16 29.3442 5.04248   1
   4   0  16 144.037 10.3165   1
   5   0  16 33.3105 6.83493   1
   6   0  16 18.1597 5.85313   1
  -7   1  16 19.1775 7.98969   1
  -6   1  16 87.2926 8.40489   1
  -5   1  16 22.5437 6.57769   1
  -4   1  16 13.2717 6.27747   1
  -3   1  16 60.5914 7.55183   1
  -2   1  16 3.74503 4.04607   1
  -1   1  16 38.3958 5.41928   1
   0   1  16 292.032 11.6703   1
   1   1  16 6.19269 4.81452   1
   2   1  16 9.33869 3.94724   1
   3   1  16 -0.1728 5.14555   1
   4   1  16 83.6574 8.39202   1
   5   1  16 38.6788 6.85863   1
  -7   2  16 36.4273 7.81516   1
  -6   2  16 26.8633 5.93939   1
  -5   2  16 197.044 11.2848   1
  -4   2  16 58.3161 7.62203   1
  -3   2  16 130.664 9.14720   1
  -2   2  16 101.108 7.12137   1
  -1   2  16 -2.0441 4.75618   1
   0   2  16 25.9650 5.68700   1
   1   2  16 32.9761 5.88851   1
   2   2  16 11.8325 5.37552   1
   3   2  16 30.9716 5.08340   1
   4   2  16 82.8280 8.31117   1
   5   2  16 21.2929 9.10985   1
  -7   3  16 43.6464 7.09264   1
  -6   3  16 203.185 12.7544   1
  -5   3  16 -3.4572 4.79348   1
  -4   3  16 4.27910 5.81477   1
  -3   3  16 91.7327 9.15520   1
  -2   3  16 16.4003 5.54047   1
  -1   3  16 100.316 5.81980   1
   0   3  16 42.1294 6.36938   1
   1   3  16 -1.2653 5.17845   1
   2   3  16 49.9260 5.63816   1
   3   3  16 27.0270 6.04145   1
   4   3  16 16.1822 7.95569   1
  -7   4  16 20.1951 8.08945   1
  -6   4  16 9.33952 6.45520   1
  -5   4  16 24.7847 7.39014   1
  -4   4  16 101.352 7.46394   1
  -3   4  16 3.09785 5.59450   1
  -2   4  16 18.1003 5.41395   1
  -1   4  16 339.564 11.9920   1
   0   4  16 152.136 8.38958   1
   1   4  16 19.5483 5.75846   1
   2   4  16 2.27006 5.81364   1
   3   4  16 -1.8106 6.24673   1
  -6   5  16 7.80470 7.49502   1
  -5   5  16 3.98418 5.96193   1
  -4   5  16 7.53953 4.92353   1
  -3   5  16 7.97015 4.91052   1
  -2   5  16 7.31925 4.54348   1
  -1   5  16 265.384 10.1230   1
   0   5  16 9.06321 4.99342   1
   1   5  16 12.1463 5.16076   1
   2   5  16 21.4611 6.46252   1
  -5   6  16 12.3567 5.92386   1
  -4   6  16 -3.4238 4.77736   1
  -3   6  16 15.2445 5.81350   1
  -2   6  16 32.8012 5.63235   1
  -1   6  16 30.7899 6.33518   1
   0   6  16 108.997 8.33886   1
  -1  -8  17 12.6957 6.12058   1
   0  -8  17 3.73238 5.50928   1
   1  -8  17 -6.7811 5.72400   1
   2  -8  17 17.9850 6.82388   1
   3  -8  17 11.9220 7.18851   1
   4  -8  17 4.76094 4.71756   1
  -3  -7  17 11.4663 7.91657   1
  -2  -7  17 43.1153 7.05167   1
  -1  -7  17 142.264 9.79572   1
   0  -7  17 23.9287 5.67456   1
   1  -7  17 14.5336 7.14600   1
   2  -7  17 76.6186 8.17952   1
   3  -7  17 23.0210 6.79041   1
   4  -7  17 26.6133 7.08171   1
   5  -7  17 6.86540 7.80525   1
  -4  -6  17 16.1224 8.33237   1
  -3  -6  17 40.4044 7.35924   1
  -2  -6  17 52.7263 6.97704   1
  -1  -6  17 0.96239 4.50308   1
   0  -6  17 -12.034 4.33213   1
   1  -6  17 6.85677 6.03491   1
   2  -6  17 0.02590 4.64064   1
   3  -6  17 4.86258 5.84285   1
   4  -6  17 23.4468 5.83497   1
   5  -6  17 13.4292 7.10248   1
   6  -6  17 7.18075 9.93475   1
  -5  -5  17 17.6777 4.78480   1
  -4  -5  17 75.3756 8.10267   1
  -3  -5  17 59.4303 6.86490   1
  -2  -5  17 24.4340 6.49457   1
  -1  -5  17 94.1085 7.80491   1
   0  -5  17 6.70910 5.48008   1
   1  -5  17 7.02229 5.79078   1
   2  -5  17 58.1261 6.71201   1
   3  -5  17 85.9698 7.93146   1
   4  -5  17 -4.2130 6.94924   1
   5  -5  17 4.21279 6.80765   1
   6  -5  17 23.4373 9.24814   1
  -5  -4  17 -4.2254 5.38309   1
  -4  -4  17 49.8028 8.07355   1
  -3  -4  17 69.1781 7.72151   1
  -2  -4  17 42.8223 6.50179   1
  -1  -4  17 1.16398 5.07353   1
   0  -4  17 -5.0432 4.84553   1
   1  -4  17 15.3055 5.97808   1
   2  -4  17 11.0266 4.33754   1
   3  -4  17 5.20374 4.49745   1
   4  -4  17 40.0291 8.31155   1
   5  -4  17 24.0376 6.68582   1
   6  -4  17 22.0980 7.38001   1
  -6  -3  17 3.95558 7.18143   1
  -5  -3  17 29.1827 6.09619   1
  -4  -3  17 -1.1367 6.58672   1
  -3  -3  17 3.02341 5.95526   1
  -2  -3  17 24.5413 5.94365   1
  -1  -3  17 10.6738 4.87150   1
   0  -3  17 55.8845 6.74810   1
   1  -3  17 65.7242 7.69683   1
   2  -3  17 183.114 11.1261   1
   3  -3  17 231.097 11.1074   1
   4  -3  17 -1.2669 5.54996   1
   5  -3  17 7.41167 6.53304   1
   6  -3  17 25.8823 6.62331   1
  -6  -2  17 -0.6646 6.94011   1
  -5  -2  17 72.2056 7.18091   1
  -4  -2  17 7.14095 5.79298   1
  -3  -2  17 127.164 10.7270   1
  -2  -2  17 4.53598 4.96362   1
  -1  -2  17 23.4411 5.56205   1
   0  -2  17 90.8151 7.81196   1
   1  -2  17 0.61964 4.94333   1
   2  -2  17 2.00613 4.09323   1
   3  -2  17 20.7892 6.10217   1
   4  -2  17 111.134 10.1441   1
   5  -2  17 3.04915 5.47676   1
   6  -2  17 22.7334 6.06690   1
  -7  -1  17 22.7230 8.25343   1
  -6  -1  17 9.06835 6.41120   1
  -5  -1  17 81.2755 7.96760   1
  -4  -1  17 181.230 11.4917   1
  -3  -1  17 11.3980 6.23218   1
  -2  -1  17 1.34587 5.59356   1
  -1  -1  17 11.5886 5.13635   1
   0  -1  17 97.7178 7.50758   1
   1  -1  17 9.34257 5.24571   1
   2  -1  17 1.23620 5.99883   1
   3  -1  17 10.6981 7.26765   1
   4  -1  17 20.2684 6.33178   1
   5  -1  17 48.5567 7.21147   1
   6  -1  17 4.67246 7.92661   1
  -7   0  17 6.20951 7.37946   1
  -6   0  17 16.4329 6.60607   1
  -5   0  17 185.866 11.7343   1
  -4   0  17 3.28252 4.87689   1
  -3   0  17 14.7049 5.95444   1
  -2   0  17 202.244 10.5885   1
  -1   0  17 125.755 7.85986   1
   0   0  17 160.322 8.61743   1
   1   0  17 67.9788 7.19430   1
   2   0  17 59.1470 8.55396   1
   3   0  17 3.65137 4.57420   1
   4   0  17 59.3272 7.68496   1
   5   0  17 0.10863 6.59907   1
  -7   1  17 6.16399 7.21163   1
  -6   1  17 1.33023 5.68720   1
  -5   1  17 11.8498 6.79750   1
  -4   1  17 58.1458 8.07566   1
  -3   1  17 31.3838 6.69334   1
  -2   1  17 190.825 8.72400   1
  -1   1  17 23.0258 5.02693   1
   0   1  17 119.285 8.30837   1
   1   1  17 16.0383 6.10220   1
   2   1  17 47.9814 7.02021   1
   3   1  17 12.6062 6.87541   1
   4   1  17 133.342 9.67463   1
   5   1  17 41.1121 8.05241   1
  -7   2  17 -13.284 7.82227   1
  -6   2  17 70.8924 7.21406   1
  -5   2  17 85.6351 9.01840   1
  -4   2  17 2.66209 4.05728   1
  -3   2  17 6.07463 5.67034   1
  -2   2  17 5.68359 4.11406   1
  -1   2  17 111.050 7.80028   1
   0   2  17 41.2233 7.00446   1
   1   2  17 70.0370 8.34106   1
   2   2  17 30.0986 5.60585   1
   3   2  17 23.2153 4.65975   1
   4   2  17 7.22332 6.66460   1
  -7   3  17 4.64113 9.11058   1
  -6   3  17 7.00773 6.79814   1
  -5   3  17 82.7199 8.76079   1
  -4   3  17 87.1731 8.66401   1
  -3   3  17 15.0066 6.08648   1
  -2   3  17 89.4709 8.11834   1
  -1   3  17 28.1169 5.31056   1
   0   3  17 28.6561 5.70073   1
   1   3  17 134.673 8.94652   1
   2   3  17 0.50428 4.26473   1
   3   3  17 16.3821 6.19455   1
  -6   4  17 81.6977 10.4013   1
  -5   4  17 25.3860 5.24590   1
  -4   4  17 26.8236 6.89261   1
  -3   4  17 26.7701 6.39193   1
  -2   4  17 100.238 7.52248   1
  -1   4  17 39.4721 5.84361   1
   0   4  17 25.6817 5.73111   1
   1   4  17 3.67401 5.67482   1
   2   4  17 42.1246 7.64094   1
  -5   5  17 29.1857 6.95787   1
  -4   5  17 42.4990 6.43039   1
  -3   5  17 21.5362 5.98226   1
  -2   5  17 -6.1307 5.03659   1
  -1   5  17 2.93634 4.74479   1
   0   5  17 -0.2515 5.72030   1
   1   5  17 6.51773 5.69671   1
  -4   6  17 43.5538 7.08119   1
  -3   6  17 3.29119 5.67023   1
  -2   6  17 0.82441 5.55227   1
  -1   6  17 9.70915 5.98132   1
   0  -8  18 5.52394 6.17844   1
   1  -8  18 28.6372 7.91742   1
   2  -8  18 17.8247 7.05228   1
   3  -8  18 22.3723 12.6420   1
  -2  -7  18 22.7629 7.07834   1
  -1  -7  18 26.0249 6.44512   1
   0  -7  18 9.56525 6.42771   1
   1  -7  18 60.1138 8.54239   1
   2  -7  18 296.938 13.3220   1
   3  -7  18 5.04339 5.97304   1
   4  -7  18 -0.1522 5.43377   1
  -3  -6  18 14.4265 7.26868   1
  -2  -6  18 6.46313 5.49863   1
  -1  -6  18 48.6189 6.73140   1
   0  -6  18 18.0687 6.09413   1
   1  -6  18 47.4957 8.52610   1
   2  -6  18 75.9909 7.20830   1
   3  -6  18 157.775 10.0298   1
   4  -6  18 20.2871 7.09303   1
   5  -6  18 4.69188 7.52035   1
  -4  -5  18 26.1720 7.12658   1
  -3  -5  18 13.1630 6.97736   1
  -2  -5  18 52.9632 7.73106   1
  -1  -5  18 37.2311 7.60846   1
   0  -5  18 -1.9816 5.82125   1
   1  -5  18 21.5612 6.68391   1
   2  -5  18 49.6101 7.30470   1
   3  -5  18 14.1249 5.20389   1
   4  -5  18 28.1659 7.25475   1
   5  -5  18 50.0035 9.06452   1
  -5  -4  18 96.5843 10.0951   1
  -4  -4  18 0.03908 6.05452   1
  -3  -4  18 1.01931 6.67016   1
  -2  -4  18 -4.4419 6.01316   1
  -1  -4  18 63.7904 7.77166   1
   0  -4  18 4.95260 5.71297   1
   1  -4  18 81.0826 8.85258   1
   2  -4  18 8.26136 5.70133   1
   3  -4  18 1.18482 4.99396   1
   4  -4  18 7.80906 7.25245   1
   5  -4  18 30.9318 7.89235   1
  -5  -3  18 -2.4909 6.25104   1
  -4  -3  18 14.2680 6.23194   1
  -3  -3  18 36.6812 7.75477   1
  -2  -3  18 100.267 9.40990   1
  -1  -3  18 5.90471 4.83928   1
   0  -3  18 71.4339 8.18387   1
   1  -3  18 18.3610 6.04992   1
   2  -3  18 28.6320 6.21121   1
   3  -3  18 8.60859 5.38284   1
   4  -3  18 -5.1677 6.48612   1
   5  -3  18 41.5368 7.39388   1
  -6  -2  18 18.1266 7.15900   1
  -5  -2  18 20.1492 6.23341   1
  -4  -2  18 20.3315 6.11293   1
  -3  -2  18 55.8721 8.49949   1
  -2  -2  18 147.012 9.69086   1
  -1  -2  18 99.9742 8.08736   1
   0  -2  18 20.5872 6.31828   1
   1  -2  18 99.6311 9.04208   1
   2  -2  18 32.2127 6.57077   1
   3  -2  18 80.7664 8.28643   1
   4  -2  18 24.3728 7.88873   1
   5  -2  18 24.0670 7.05790   1
  -6  -1  18 21.6839 6.86113   1
  -5  -1  18 265.268 11.4302   1
  -4  -1  18 35.9692 5.91816   1
  -3  -1  18 122.164 9.82553   1
  -2  -1  18 386.842 14.6371   1
  -1  -1  18 197.437 10.7145   1
   0  -1  18 28.7065 5.80751   1
   1  -1  18 8.04463 5.89751   1
   2  -1  18 18.5702 6.00534   1
   3  -1  18 444.839 15.1663   1
   4  -1  18 203.470 12.5722   1
   5  -1  18 3.96914 7.85097   1
  -6   0  18 75.8942 8.14920   1
  -5   0  18 5.68193 6.66922   1
  -4   0  18 61.9449 8.66616   1
  -3   0  18 12.0483 6.39219   1
  -2   0  18 2.59472 5.69954   1
  -1   0  18 11.1105 5.73097   1
   0   0  18 233.652 12.0191   1
   1   0  18 13.9173 5.62883   1
   2   0  18 -4.3565 6.36542   1
   3   0  18 84.4408 7.04274   1
   4   0  18 22.9727 8.31147   1
   5   0  18 17.3511 7.14482   1
  -6   1  18 38.7744 7.35847   1
  -5   1  18 -0.7362 6.66675   1
  -4   1  18 17.6501 6.93236   1
  -3   1  18 39.0998 6.75600   1
  -2   1  18 21.7422 4.57373   1
  -1   1  18 19.3543 5.46218   1
   0   1  18 8.74093 5.90539   1
   1   1  18 2.20263 5.84444   1
   2   1  18 5.95785 6.51570   1
   3   1  18 21.5865 5.07105   1
   4   1  18 9.24998 6.17420   1
  -6   2  18 35.6498 7.02793   1
  -5   2  18 21.3249 7.78550   1
  -4   2  18 59.1443 8.65347   1
  -3   2  18 1.02666 5.89535   1
  -2   2  18 17.2840 4.58777   1
  -1   2  18 17.5740 4.15909   1
   0   2  18 158.298 9.42828   1
   1   2  18 40.7990 6.53145   1
   2   2  18 9.73251 5.44474   1
   3   2  18 12.7523 4.84329   1
  -6   3  18 47.0248 10.4798   1
  -5   3  18 33.2474 7.68550   1
  -4   3  18 11.1114 6.54336   1
  -3   3  18 7.06131 6.17941   1
  -2   3  18 73.0429 8.25395   1
  -1   3  18 115.156 8.70525   1
   0   3  18 28.8429 5.77431   1
   1   3  18 11.7360 5.61397   1
   2   3  18 38.5845 7.03576   1
   3   3  18 15.5060 15.9566   1
  -5   4  18 2.38002 5.52202   1
  -4   4  18 1.82841 6.32077   1
  -3   4  18 7.03110 6.31952   1
  -2   4  18 49.0484 6.25555   1
  -1   4  18 89.9763 7.36257   1
   0   4  18 67.2388 7.13610   1
   1   4  18 40.7106 7.32308   1
  -4   5  18 0.61775 6.22281   1
  -3   5  18 -3.4834 6.22275   1
  -2   5  18 84.2277 5.21202   1
  -1   5  18 80.6955 6.87327   1
   0   5  18 6.88493 6.74610   1
  -1  -7  19 138.819 9.88978   1
   0  -7  19 -1.6855 7.37782   1
   1  -7  19 2.32741 7.46056   1
   2  -7  19 107.416 10.8892   1
   3  -7  19 20.5995 7.00233   1
  -2  -6  19 11.3047 6.33428   1
  -1  -6  19 22.1003 5.93500   1
   0  -6  19 1.84346 4.97796   1
   1  -6  19 26.6007 6.85528   1
   2  -6  19 25.9910 6.80559   1
   3  -6  19 78.0237 8.14392   1
   4  -6  19 13.3493 6.62778   1
  -3  -5  19 41.3605 7.47841   1
  -2  -5  19 39.1454 6.61041   1
  -1  -5  19 85.6281 8.81600   1
   0  -5  19 20.3423 7.65562   1
   1  -5  19 28.2511 7.59772   1
   2  -5  19 34.6854 7.58969   1
   3  -5  19 70.7117 7.57619   1
   4  -5  19 12.8223 7.20331   1
  -4  -4  19 8.04133 7.00622   1
  -3  -4  19 122.806 9.97594   1
  -2  -4  19 46.8389 7.53592   1
  -1  -4  19 33.4625 5.29375   1
   0  -4  19 30.5926 7.19504   1
   1  -4  19 15.5127 6.90888   1
   2  -4  19 37.6858 7.73399   1
   3  -4  19 8.63698 5.43835   1
   4  -4  19 4.29699 6.14527   1
   5  -4  19 73.9718 10.9018   1
  -5  -3  19 84.2975 10.2314   1
  -4  -3  19 5.60171 6.42648   1
  -3  -3  19 22.5504 7.61715   1
  -2  -3  19 37.6551 6.95056   1
  -1  -3  19 19.1410 5.37549   1
   0  -3  19 221.829 11.8558   1
   1  -3  19 113.466 9.89726   1
   2  -3  19 12.4608 5.68796   1
   3  -3  19 285.317 12.3458   1
   4  -3  19 121.145 10.7797   1
   5  -3  19 37.7791 8.02586   1
  -5  -2  19 273.835 11.9752   1
  -4  -2  19 20.7413 6.76398   1
  -3  -2  19 6.40527 6.62754   1
  -2  -2  19 12.9253 5.75530   1
  -1  -2  19 40.4897 7.19925   1
   0  -2  19 267.543 12.2321   1
   1  -2  19 198.217 11.0662   1
   2  -2  19 79.5830 8.13789   1
   3  -2  19 33.2745 5.55970   1
   4  -2  19 62.6697 9.25152   1
   5  -2  19 20.3571 9.38019   1
  -6  -1  19 83.0403 14.7542   1
  -5  -1  19 4.43623 6.11466   1
  -4  -1  19 6.50212 7.11959   1
  -3  -1  19 206.318 12.6623   1
  -2  -1  19 107.395 8.85455   1
  -1  -1  19 23.9806 6.99964   1
   0  -1  19 10.5788 5.47029   1
   1  -1  19 45.1731 7.04480   1
   2  -1  19 9.96821 5.57180   1
   3  -1  19 107.476 8.90533   1
   4  -1  19 14.8127 8.67743   1
  -6   0  19 1.39337 6.74711   1
  -5   0  19 82.3109 8.62725   1
  -4   0  19 331.237 14.9669   1
  -3   0  19 45.9616 7.42625   1
  -2   0  19 24.1214 5.86566   1
  -1   0  19 2.63539 5.87747   1
   0   0  19 161.081 10.8128   1
   1   0  19 10.1096 5.96461   1
   2   0  19 13.9909 7.14212   1
   3   0  19 74.5020 8.70034   1
   4   0  19 52.8144 9.20633   1
  -6   1  19 17.9544 7.67396   1
  -5   1  19 7.05083 5.17647   1
  -4   1  19 -1.6804 6.28820   1
  -3   1  19 71.1298 8.82849   1
  -2   1  19 25.2620 4.81330   1
  -1   1  19 29.4820 5.63273   1
   0   1  19 2.70168 5.79862   1
   1   1  19 5.10859 5.52495   1
   2   1  19 1.80113 5.98421   1
   3   1  19 0.06043 6.77650   1
  -6   2  19 -35.489 24.1893   1
  -5   2  19 -1.2771 7.05103   1
  -4   2  19 36.5698 8.23475   1
  -3   2  19 20.5368 6.73745   1
  -2   2  19 23.6841 4.84813   1
  -1   2  19 34.3985 6.26774   1
   0   2  19 2.46875 6.11742   1
   1   2  19 4.00192 5.52247   1
   2   2  19 16.5388 5.85842   1
   3   2  19 -3.9757 11.1243   1
  -5   3  19 3.18657 8.93596   1
  -4   3  19 348.571 14.5089   1
  -3   3  19 4.13282 6.46284   1
  -2   3  19 4.00279 5.20442   1
  -1   3  19 22.3171 6.13266   1
   0   3  19 2.18534 5.37042   1
   1   3  19 174.568 9.83259   1
   2   3  19 45.3507 11.5446   1
  -4   4  19 43.8316 8.51592   1
  -3   4  19 47.7360 7.68891   1
  -2   4  19 4.96627 3.58793   1
  -1   4  19 14.1605 5.70558   1
   0   4  19 2.19591 5.94050   1
  -1  -6  20 3.06137 5.58632   1
   0  -6  20 11.8772 6.29982   1
   1  -6  20 20.2373 7.18250   1
   2  -6  20 55.1571 8.14340   1
   3  -6  20 37.7740 9.04988   1
  -3  -5  20 4.56187 23.8541   1
  -2  -5  20 9.20037 7.68092   1
  -1  -5  20 9.05650 6.55279   1
   0  -5  20 60.4518 8.38268   1
   1  -5  20 12.2043 6.91799   1
   2  -5  20 33.5981 8.45695   1
   3  -5  20 30.6963 7.13048   1
  -3  -4  20 -0.9797 7.27953   1
  -2  -4  20 14.8926 6.03266   1
  -1  -4  20 5.76607 6.34703   1
   0  -4  20 28.6086 7.33220   1
   1  -4  20 84.2088 9.17771   1
   2  -4  20 82.6144 9.58486   1
   3  -4  20 18.9849 6.79452   1
   4  -4  20 25.6770 8.02941   1
  -4  -3  20 9.07477 8.04918   1
  -3  -3  20 -8.5081 7.19698   1
  -2  -3  20 -5.6755 5.73631   1
  -1  -3  20 12.7158 7.54211   1
   0  -3  20 229.722 12.6974   1
   1  -3  20 23.3583 7.69944   1
   2  -3  20 -3.6823 5.63859   1
   3  -3  20 2.65722 5.40666   1
   4  -3  20 76.5726 10.3188   1
  -5  -2  20 117.421 48.0962   1
  -4  -2  20 0.18544 7.69726   1
  -3  -2  20 18.2426 7.66980   1
  -2  -2  20 -8.1747 5.03381   1
  -1  -2  20 -0.8969 6.26691   1
   0  -2  20 32.5467 7.45108   1
   1  -2  20 59.4966 7.59823   1
   2  -2  20 86.9695 8.26484   1
   3  -2  20 98.6434 9.41701   1
   4  -2  20 75.1823 12.8842   1
  -5  -1  20 6.84464 8.31068   1
  -4  -1  20 41.3978 8.62505   1
  -3  -1  20 2.07148 6.52412   1
  -2  -1  20 22.5144 5.15283   1
  -1  -1  20 28.7093 7.10931   1
   0  -1  20 11.8289 6.83419   1
   1  -1  20 234.253 12.1462   1
   2  -1  20 15.6008 6.59481   1
   3  -1  20 28.4802 7.90638   1
  -5   0  20 10.3651 7.71751   1
  -4   0  20 39.2680 8.67146   1
  -3   0  20 4.80025 6.20866   1
  -2   0  20 108.876 8.63279   1
  -1   0  20 19.1377 6.20010   1
   0   0  20 12.0578 6.13727   1
   1   0  20 17.1758 6.32772   1
   2   0  20 14.0392 5.90460   1
   3   0  20 28.3505 8.24071   1
  -5   1  20 14.0389 7.87870   1
  -4   1  20 -0.0798 7.02682   1
  -3   1  20 43.7609 7.14097   1
  -2   1  20 33.4220 6.25856   1
  -1   1  20 5.76868 5.09562   1
   0   1  20 34.1404 7.28678   1
   1   1  20 43.9726 7.22940   1
   2   1  20 28.1668 6.56661   1
  -5   2  20 18.9554 27.2001   1
  -4   2  20 63.0261 9.59242   1
  -3   2  20 48.2389 8.25153   1
  -2   2  20 37.0056 7.14164   1
  -1   2  20 -7.7285 5.81655   1
   0   2  20 -6.7695 6.64280   1
   1   2  20 160.561 10.1592   1
  -4   3  20 13.4981 8.78697   1
  -3   3  20 33.7546 7.01161   1
  -2   3  20 48.4906 6.89305   1
  -1   3  20 28.9190 7.08931   1
   0   3  20 15.3212 6.96640   1
  -1  -5  21 108.563 9.82481   1
   0  -5  21 34.6886 8.06394   1
   1  -5  21 29.1563 9.22412   1
   2  -5  21 32.6717 8.77446   1
  -2  -4  21 11.3643 6.93575   1
  -1  -4  21 8.38547 6.87197   1
   0  -4  21 73.7191 9.15333   1
   1  -4  21 20.5166 7.63756   1
   2  -4  21 12.8436 8.11574   1
   3  -4  21 16.9157 7.46043   1
  -3  -3  21 15.3844 8.16714   1
  -2  -3  21 11.9887 6.55599   1
  -1  -3  21 -0.5735 7.29950   1
   0  -3  21 180.231 11.5029   1
   1  -3  21 9.18985 7.93600   1
   2  -3  21 91.3814 9.35913   1
   3  -3  21 116.998 10.4616   1
  -4  -2  21 -1.2748 11.6131   1
  -3  -2  21 17.8271 7.28490   1
  -2  -2  21 1.91837 5.29675   1
  -1  -2  21 0.02096 6.66437   1
   0  -2  21 50.1650 8.23439   1
   1  -2  21 19.9303 6.49242   1
   2  -2  21 0.72014 6.80162   1
   3  -2  21 7.47343 8.14580   1
  -4  -1  21 20.6940 8.82006   1
  -3  -1  21 33.8060 7.94344   1
  -2  -1  21 23.3760 5.39663   1
  -1  -1  21 -1.8340 6.33443   1
   0  -1  21 24.6952 7.03502   1
   1  -1  21 5.18548 6.56406   1
   2  -1  21 5.24314 6.46525   1
  -4   0  21 28.1693 8.57472   1
  -3   0  21 22.2038 7.52030   1
  -2   0  21 35.2285 7.02094   1
  -1   0  21 2.78121 5.97304   1
   0   0  21 37.9897 7.84735   1
   1   0  21 55.4829 7.86575   1
   2   0  21 14.6721 6.93720   1
  -4   1  21 71.1085 11.3866   1
  -3   1  21 43.4144 8.61006   1
  -2   1  21 49.5870 7.93987   1
  -1   1  21 26.7725 7.31313   1
   0   1  21 13.2786 6.88175   1
   1   1  21 2.58856 7.25496   1
  -3   2  21 114.182 9.76694   1
  -2   2  21 1.38596 7.43004   1
  -1   2  21 8.46205 6.79703   1
   0   2  21 3.35505 7.67421   1
   0  -4  22 127.413 20.5273   1
  -1  -3  22 11.9204 7.97463   1
   0  -3  22 91.0557 12.0798   1
   1  -3  22 22.4815 9.36607   1
  -2  -2  22 20.6839 6.88982   1
  -1  -2  22 10.2218 8.05546   1
   0  -2  22 9.18651 8.63162   1
   1  -2  22 23.4516 9.05132   1
  -2  -1  22 -3.3655 7.56473   1
  -1  -1  22 20.8079 8.30962   1
   0  -1  22 36.2132 9.06326   1
   1  -1  22 -4.1806 7.13609   1
  -2   0  22 10.6504 7.65459   1
  -1   0  22 20.4326 8.94641   1
   0   0  22 49.4803 8.69916   1
   0   0   0    0.00    0.00   0
;
_shelx_hkl_checksum               31043
