# Supplementary material
Source: MDPI journal article supplement (https://www.mdpi.com/2624-8549/5/2/65)
Supplement: s1 [file s1 › Supporting Information_final.pdf]

# Supporting Information

## Synthesis, Structure, and Spectroscopic Properties of Luminescent Coordination Polymers based on the 2,5-Dimethoxyterephthalate Linker

Aimée E. L. Cammiade,<sup>[a]</sup> Laura Straub,<sup>[a]</sup> David van Gerven,<sup>[a]</sup> Mathias S. Wickleder,<sup>[a]</sup> Uwe Ruschewitz\*<sup>[a]</sup>

<sup>[a]</sup> A. E. L. Cammiade, Dr. L. Straub, Dr. D. van Gerven, Prof. Dr. M. S. Wickleder, Prof. Dr. U. Ruschewitz  
Department of Chemistry  
University of Cologne  
Greinstraße 6, D-50939 Köln, Germany  
E-mail: uwe.ruschewitz@uni-koeln.de

Page 2: Figure S1. PXRD pattern of [Co<sup>II</sup>(2,5-DMT)] (**1**).  
Figure S2. PXRD pattern of [Mn<sup>II</sup>(2,5-DMT)] (**2**).

Page 3: Figure S3. PXRD pattern of [Zn<sup>II</sup>(2,5-DMT)] (**3**).  
Figure S4. PXRD pattern of [Mg<sub>2</sub>(2,5-DMT)<sub>2</sub>(DMF)<sub>2</sub>] (**4**).

Page 4: Figure S5. Asymmetric unit of [Co<sup>II</sup>(2,5-DMT)] (**1**).  
Figure S6. Space filling representation of [Co<sup>II</sup>(2,5-DMT)] (**1**).

Page 5: Figure S7. DSC curves of **1-4**.  
Figure S8. UV/vis measurements of 2,5-DMT and **2-4**.

Page 6: Figure S9. Photographs of fluorescence of **1-4** upon UV light irradiation.

Pages 7-10 Tables S1 – S5. Crystallographic data of [Co<sup>II</sup>(2,5-DMT)] (**1**).

Page 11-18: Tables S6 – S10. Crystallographic data of [Mg<sub>2</sub>(2,5-DMT)<sub>2</sub>(DMF)<sub>2</sub>] (**4**).

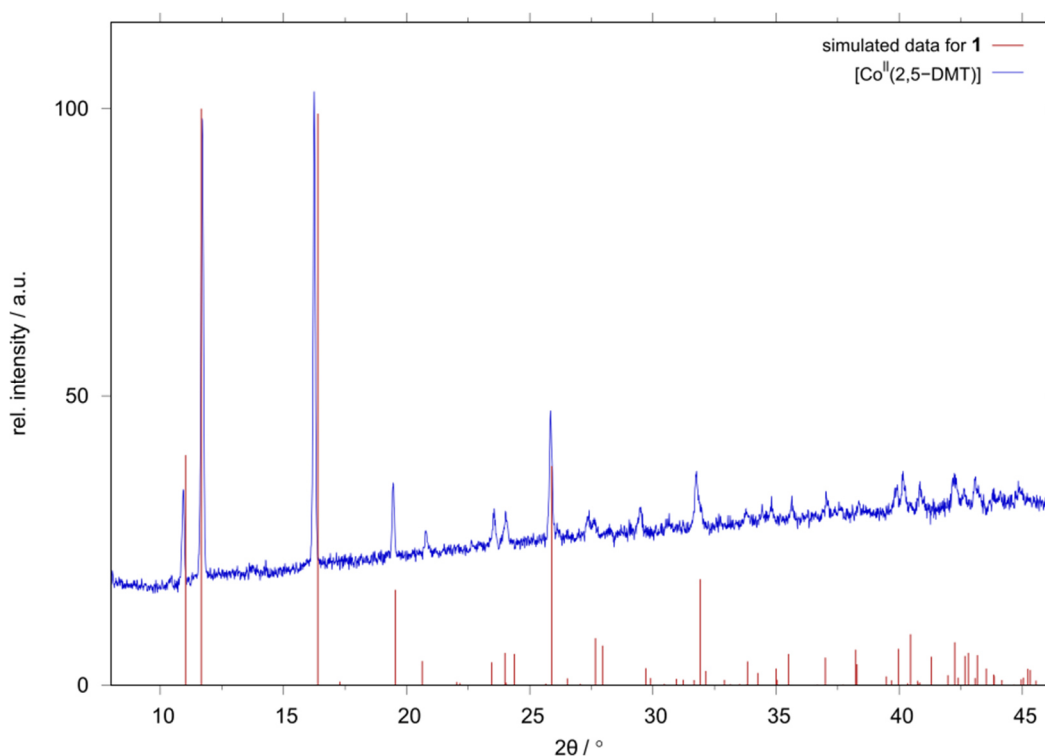

**Figure S1.** PXRD pattern of  $[\text{Co}^{\text{II}}(2,5\text{-DMT})]$  (**1**), blue curve (Rigaku *Miniflex 600-C*, Cu  $K\alpha$  radiation, RT). A line diagram (red), simulated from the crystal structure of **1** (100 K), is given for comparison.

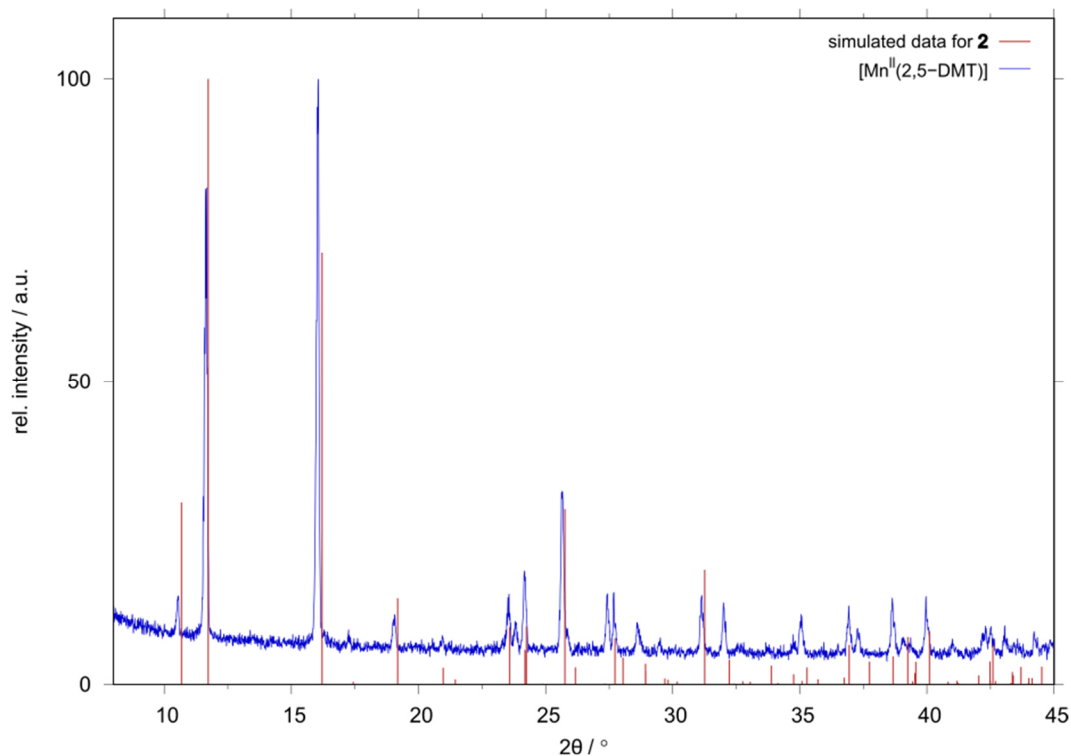

**Figure S2.** PXRD pattern of  $[\text{Mn}^{\text{II}}(2,5\text{-DMT})]$  (**2**), blue curve (Rigaku *Miniflex 600-C*, Cu  $K\alpha$  radiation, RT). A line diagram (red), simulated from the crystal structure of **2** (153 K), is given for comparison.

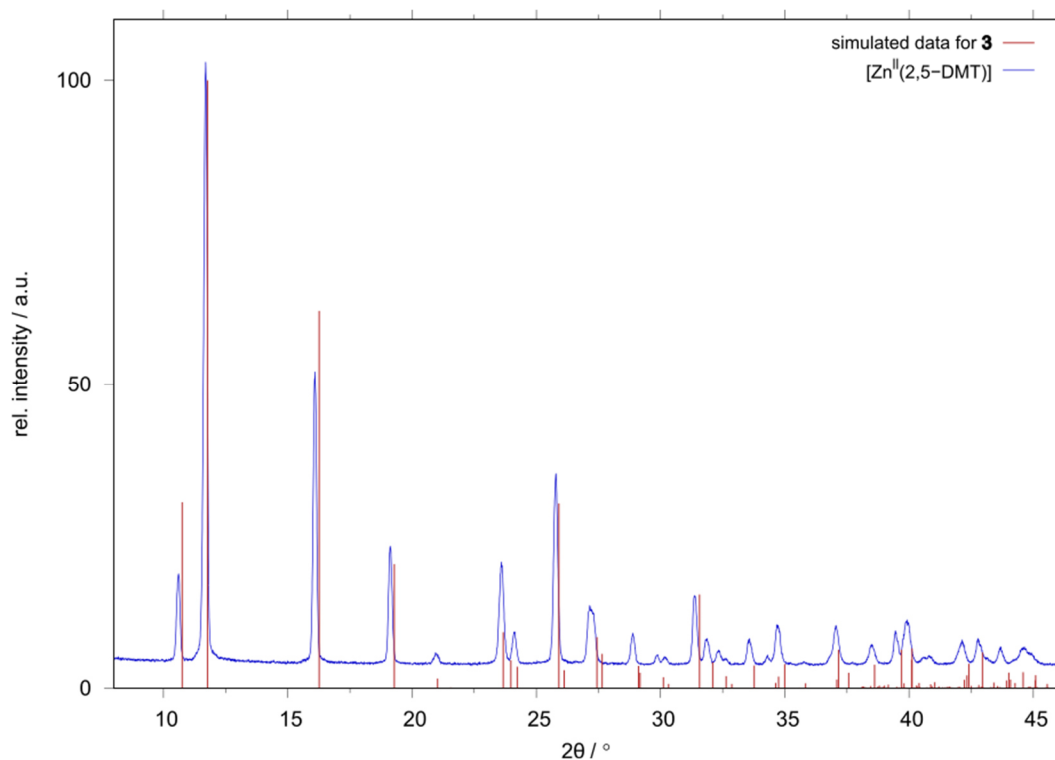

**Figure S3.** PXRD pattern of  $[\text{Zn}^{\text{II}}(2,5\text{-DMT})]$  (**3**), blue curve (Rigaku *Miniflex 600-C*, Cu  $K\alpha$  radiation, RT). A line diagram (red), simulated from the crystal structure of **3** (153 K), is given for comparison

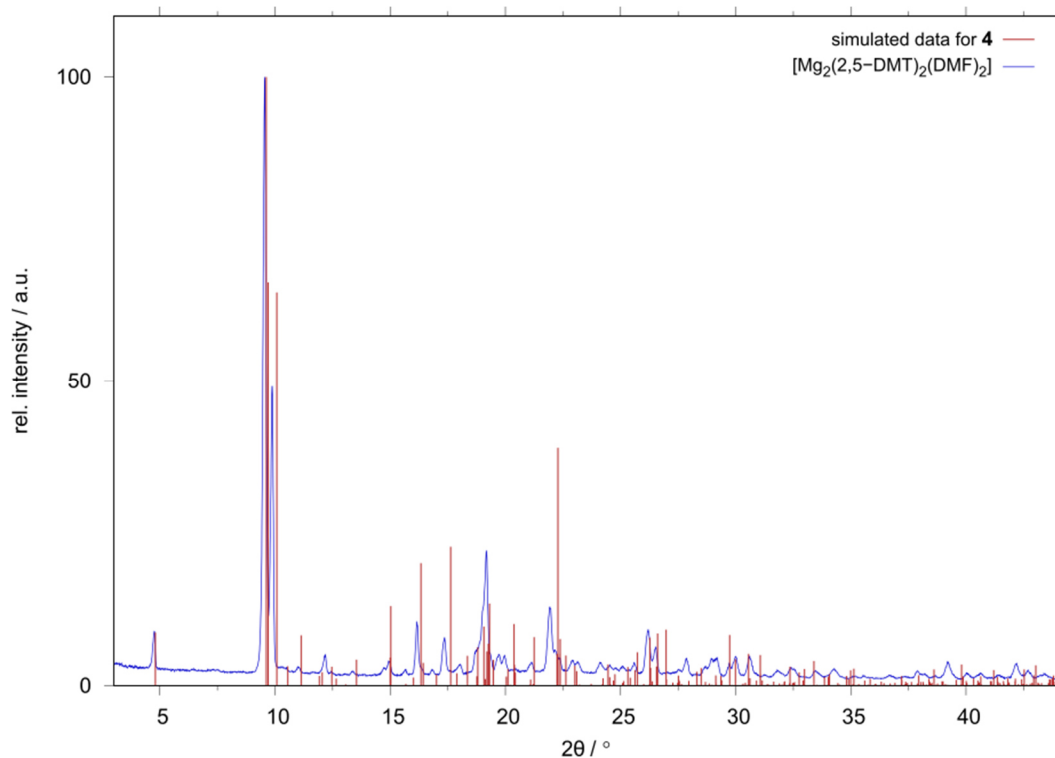

**Figure S4.** PXRD pattern of  $[\text{Mg}_2(2,5\text{-DMT})_2(\text{DMF})_2]$  (**4**), blue curve (Rigaku *Miniflex 600-C*, Cu  $K\alpha$  radiation, RT). A line diagram (red), simulated from the crystal structure of **4** (100 K), is given for comparison.

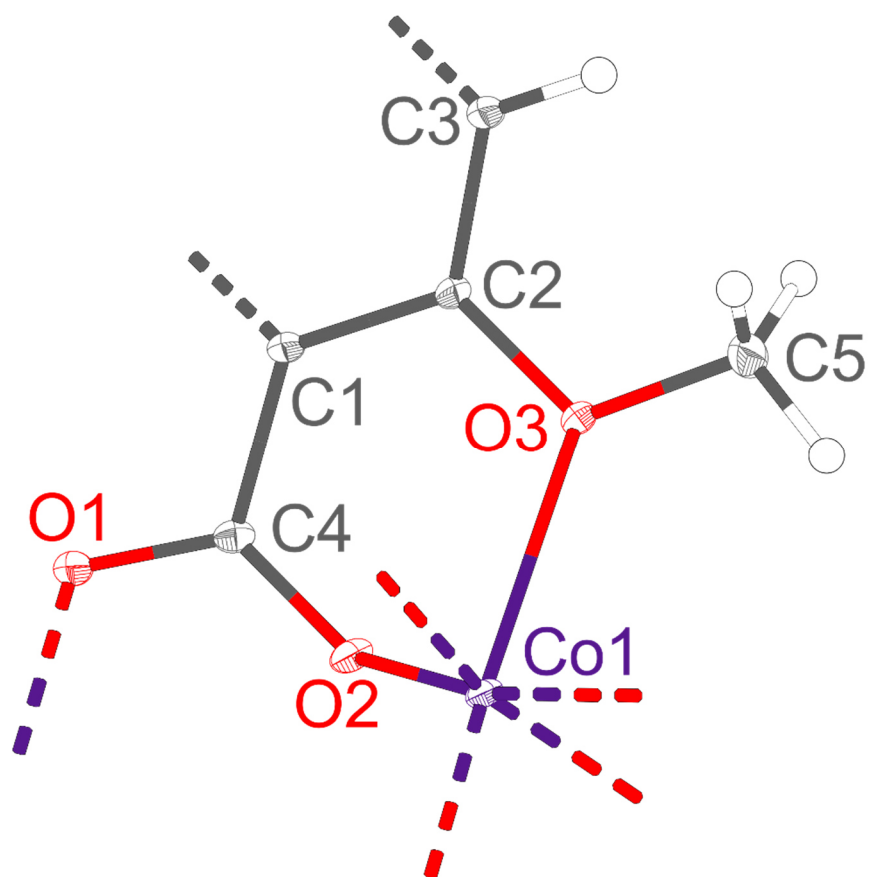

**Figure S5.** Asymmetric unit of  $[\text{Co}^{\text{II}}(2,5\text{-DMT})]$  (**1**) with atomic numbering. Thermal ellipsoids are drawn with a 50% probability.

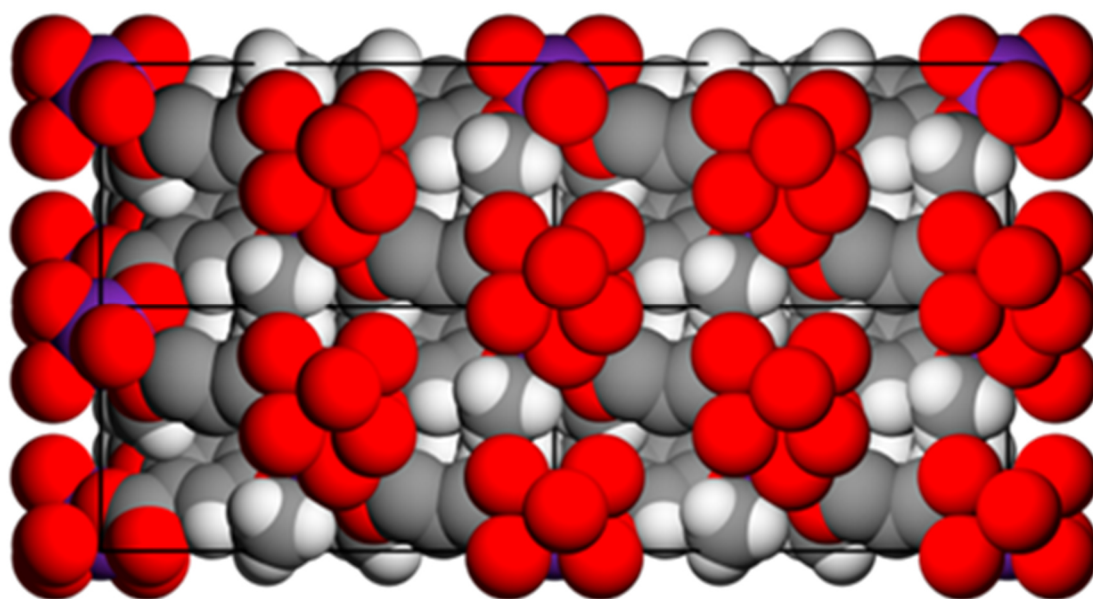

**Figure S6.** Space filling representation of the crystal structure of  $[\text{Co}^{\text{II}}(2,5\text{-DMT})]$  (**1**) in a view along  $[001]$ .

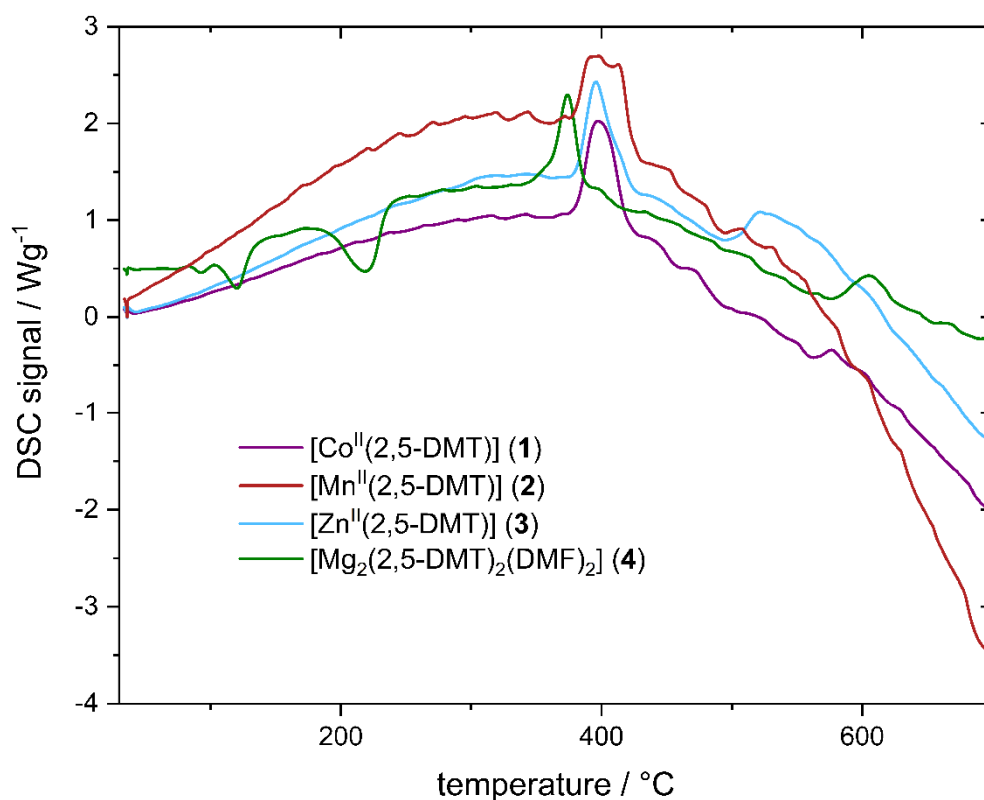

**Figure S7:** DSC measurements of compounds **1-4**.

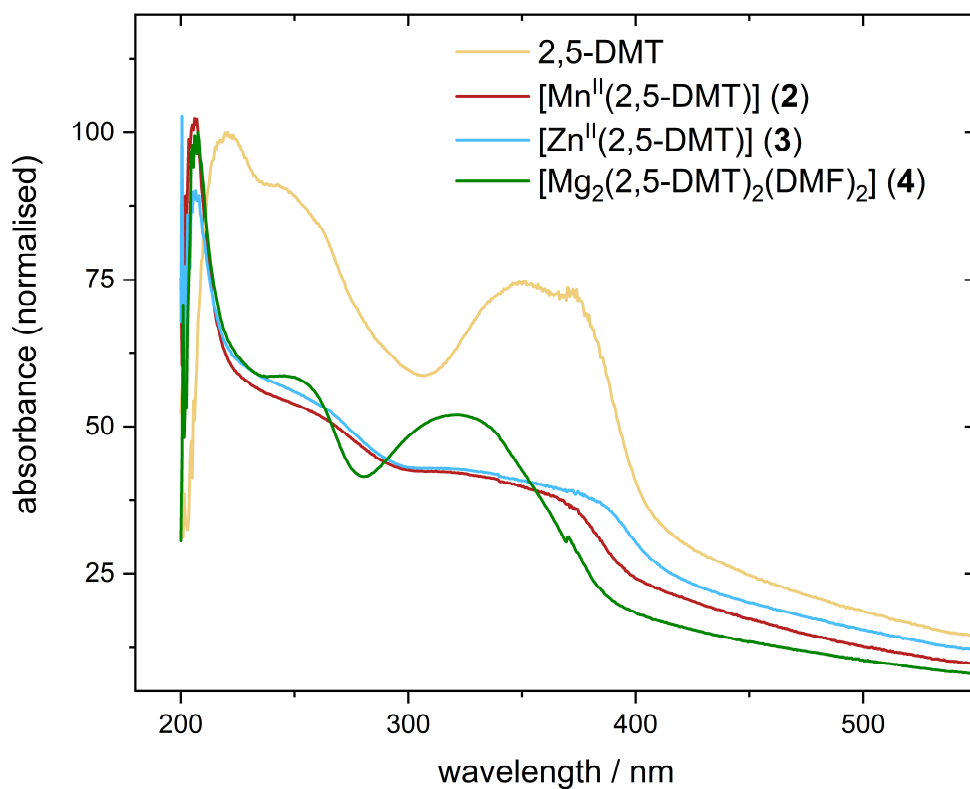

**Figure S8.** UV/vis measurements of 2,5-dimethoxy terephthalic acid (2,5-DMT) and compounds **2-4**.

**1:**  $[\text{Co}^{\text{II}}(2,5\text{-DMT})]$

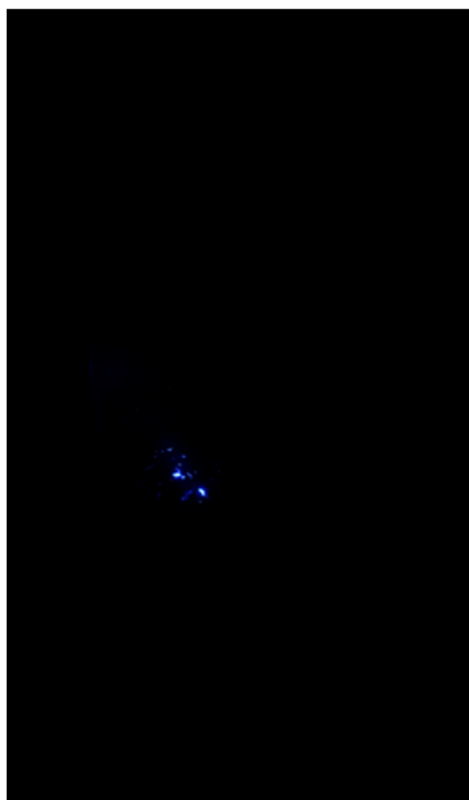

**2:**  $[\text{Mn}^{\text{II}}(2,5\text{-DMT})]$

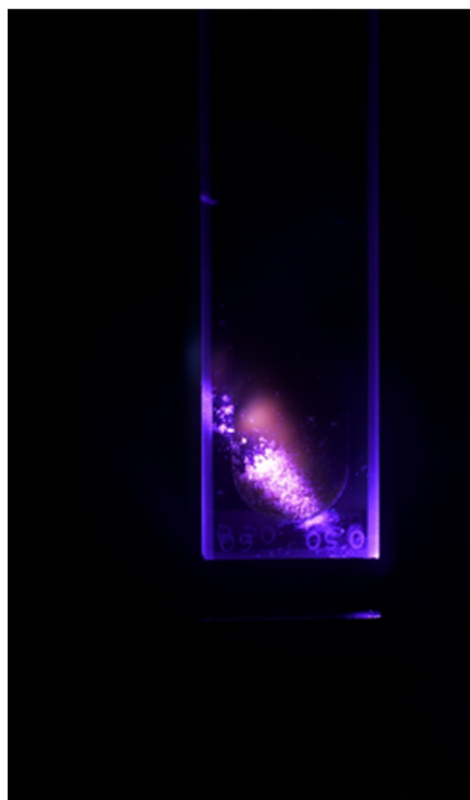

**3:**  $[\text{Zn}^{\text{II}}(2,5\text{-DMT})]$

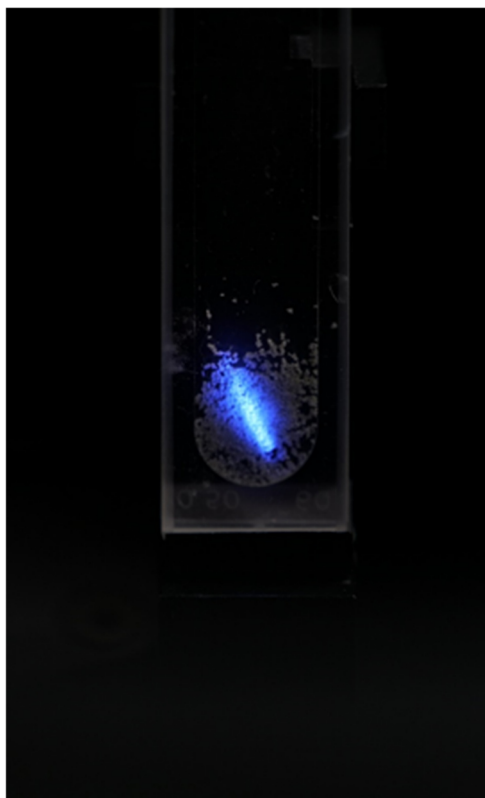

**4:**  $[\text{Mg}_2(2,5\text{-DMT})_2(\text{DMF})_2]$

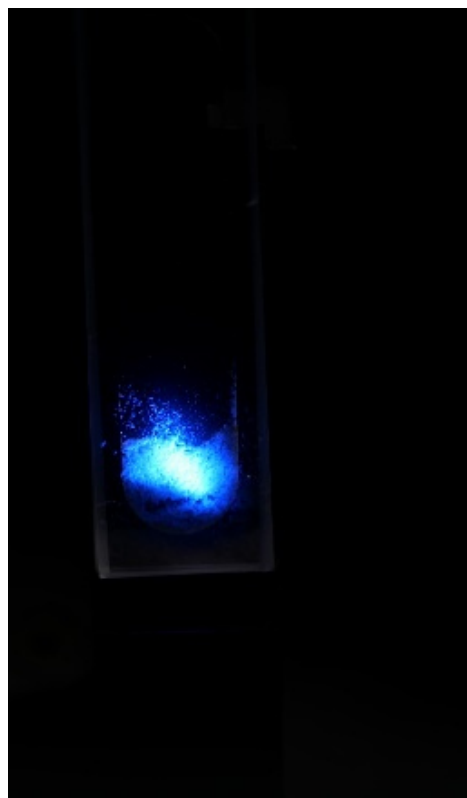

**Figure S9:** Photographs of fluorescence of compounds **1-4** upon blue light irradiation ( $\lambda = 405 \text{ nm}$ ).

**Table S1.** Crystal data and structure refinement details for [Co<sup>II</sup>(2,5-DMT)] (1).

|                                                              |                                                                                |
|--------------------------------------------------------------|--------------------------------------------------------------------------------|
| CCDC number                                                  | 2225418                                                                        |
| Empirical formula                                            | C <sub>10</sub> H <sub>8</sub> CoO <sub>6</sub>                                |
| Formula weight                                               | 283.09                                                                         |
| Temperature [K]                                              | 100(2)                                                                         |
| Crystal system                                               | monoclinic                                                                     |
| Space group (number)                                         | C2/c (15)                                                                      |
| <i>a</i> [Å]                                                 | 16.1305(5)                                                                     |
| <i>b</i> [Å]                                                 | 8.6024(3)                                                                      |
| <i>c</i> [Å]                                                 | 7.3426(2)                                                                      |
| $\alpha$ [°]                                                 | 90                                                                             |
| $\beta$ [°]                                                  | 96.425(1)                                                                      |
| $\gamma$ [°]                                                 | 90                                                                             |
| Volume [Å <sup>3</sup> ]                                     | 1012.47(5)                                                                     |
| <i>Z</i>                                                     | 4                                                                              |
| $\rho_{\text{calc}}$ [g·cm <sup>-3</sup> ]                   | 1.857                                                                          |
| $\mu$ [mm <sup>-1</sup> ]                                    | 0.889                                                                          |
| <i>F</i> (000)                                               | 572                                                                            |
| Crystal size [mm <sup>3</sup> ]                              | 0.16×0.14×0.11                                                                 |
| Crystal colour                                               | clear pinkish violet                                                           |
| Crystal shape                                                | block                                                                          |
| Radiation                                                    | AgK $\alpha$ ( $\lambda$ =0.56086 Å)                                           |
| 2 $\theta$ range [°]                                         | 4.24 to 52.90 (0.63 Å)                                                         |
| Index ranges                                                 | -25 ≤ <i>h</i> ≤ 25<br>-13 ≤ <i>k</i> ≤ 13<br>-11 ≤ <i>l</i> ≤ 11              |
| Reflections collected                                        | 15620                                                                          |
| Independent reflections                                      | 2133<br><i>R</i> <sub>int</sub> = 0.0298<br><i>R</i> <sub>sigma</sub> = 0.0180 |
| Completeness to $\Theta$ = 19.665°                           | 99.8 %                                                                         |
| Data / Restraints / Parameters                               | 2133/0/79                                                                      |
| Goodness-of-fit on <i>F</i> <sup>2</sup>                     | 1.118                                                                          |
| Final <i>R</i> indexes [ <i>I</i> ≥ 2 $\sigma$ ( <i>I</i> )] | <i>R</i> <sub>1</sub> = 0.0225<br><i>wR</i> <sub>2</sub> = 0.0584              |
| Final <i>R</i> indexes [all data]                            | <i>R</i> <sub>1</sub> = 0.0238<br><i>wR</i> <sub>2</sub> = 0.0589              |
| Largest peak/hole [eÅ <sup>-3</sup> ]                        | 0.92/-0.38                                                                     |

**Table S2.** Atomic coordinates and  $U_{eq}$  [ $\text{\AA}^2$ ] for  $[\text{Co}^{\text{II}}(2,5\text{-DMT})]$  (**1**).

| Atom | <i>x</i>      | <i>y</i>   | <i>z</i>      | $U_{eq}$   |
|------|---------------|------------|---------------|------------|
| Co1  | $\frac{1}{2}$ | 0.61097(2) | $\frac{1}{4}$ | 0.00744(5) |
| O1   | 0.60171(4)    | 0.52493(9) | 0.7255(1)     | 0.0107(1)  |
| O2   | 0.52456(4)    | 0.66173(8) | 0.51402(9)    | 0.0095(1)  |
| O3   | 0.60474(4)    | 0.80245(9) | 0.2654(1)     | 0.0112(1)  |
| C1   | 0.67322(5)    | 0.6906(1)  | 0.5410(1)     | 0.0081(1)  |
| C2   | 0.67697(5)    | 0.7774(1)  | 0.3802(1)     | 0.0084(1)  |
| C4   | 0.59436(5)    | 0.6213(1)  | 0.5964(1)     | 0.0083(1)  |
| C3   | 0.75368(5)    | 0.8355(1)  | 0.3422(1)     | 0.0091(1)  |
| H3   | 0.756398      | 0.894597   | 0.233704      | 0.011      |
| C5   | 0.61164(7)    | 0.8929(2)  | 0.1037(2)     | 0.0215(2)  |
| H5A  | 0.649021      | 0.840157   | 0.027163      | 0.032      |
| H5B  | 0.634240      | 0.995706   | 0.138642      | 0.032      |
| H5C  | 0.556381      | 0.904534   | 0.034626      | 0.032      |

$U_{eq}$  is defined as 1/3 of the trace of the orthogonalized  $U_{ij}$  tensor.

**Table S3.** Atomic displacement parameters ( $\text{\AA}^2$ ) for  $[\text{Co}^{\text{II}}(2,5\text{-DMT})]$  (**1**).

|     | $U_{11}$   | $U_{22}$   | $U_{33}$   | $U_{12}$   | $U_{13}$    | $U_{23}$   |
|-----|------------|------------|------------|------------|-------------|------------|
| C1  | 0.0059(3)  | 0.0092(3)  | 0.0089(3)  | −0.0014(2) | −0.0003(2)  | 0.0004(3)  |
| C2  | 0.0062(3)  | 0.0091(3)  | 0.0094(3)  | −0.0010(3) | −0.0014(3)  | 0.0008(3)  |
| C3  | 0.0067(3)  | 0.0112(4)  | 0.0092(3)  | −0.0017(3) | −0.0006(3)  | 0.0015(3)  |
| C4  | 0.0067(3)  | 0.0095(3)  | 0.0085(3)  | −0.0011(3) | 0.0005(3)   | −0.0016(3) |
| C5  | 0.0149(4)  | 0.0268(5)  | 0.0205(5)  | −0.0084(4) | −0.0074(4)  | 0.0149(4)  |
| Co1 | 0.00448(7) | 0.01072(8) | 0.00697(8) | 0          | −0.00002(5) | 0          |
| O1  | 0.0078(3)  | 0.0133(3)  | 0.0109(3)  | −0.0020(2) | −0.0002(2)  | 0.0029(2)  |
| O2  | 0.0059(2)  | 0.0130(3)  | 0.0093(3)  | 0.0005(2)  | −0.0003(2)  | −0.0007(2) |
| O3  | 0.0068(3)  | 0.0137(3)  | 0.0121(3)  | −0.0024(2) | −0.0033(2)  | 0.0051(2)  |

**Table S4.** Bond lengths and angles for [Co<sup>II</sup>(2,5-DMT)] (1).

| Atom–Atom            | Length [Å] | Atom–Atom–Atom | Angle [°] |
|----------------------|------------|----------------|-----------|
| Co1–O1 <sup>#1</sup> | 2.0389(7)  | O1–Co1–O1      | 110.02(4) |
| Co1–O1 <sup>#2</sup> | 2.0389(7)  | O1–Co1–O3      | 167.84(3) |
| Co1–O2               | 1.9834(7)  | O1–Co1–O3      | 167.84(3) |
| Co1–O2 <sup>#3</sup> | 1.9834(7)  | O1–Co1–O3      | 79.93(3)  |
| Co1–O3               | 2.3533(7)  | O1–Co1–O3      | 79.93(3)  |
| Co1–O3 <sup>#3</sup> | 2.3532(7)  | O2–Co1–O1      | 97.93(3)  |
| O1–C4                | 1.254(1)   | O2–Co1–O1      | 96.58(3)  |
| O2–C4                | 1.266(1)   | O2–Co1–O1      | 97.93(3)  |
| O3–C2                | 1.376(1)   | O2–Co1–O1      | 96.58(3)  |
| O3–C5                | 1.435(1)   | O2–Co1–O2      | 154.56(4) |
| C1–C2                | 1.404(1)   | O2–Co1–O3      | 74.63(3)  |
| C1–C4                | 1.502(1)   | O2–Co1–O3      | 87.52(3)  |
| C1–C3 <sup>#4</sup>  | 1.397(1)   | O2–Co1–O3      | 87.52(3)  |
| C2–C3                | 1.391(1)   | O2–Co1–O3      | 74.63(3)  |
| C3–H3                | 0.9500     | O3–Co1–O3      | 91.15(4)  |
| C5–H5A               | 0.9800     | C4–O1–Co1      | 115.89(6) |
| C5–H5B               | 0.9800     | C4–O2–Co1      | 118.44(6) |
| C5–H5C               | 0.9800     | C2–O3–Co1      | 118.29(6) |
|                      |            | C2–O3–C5       | 116.94(8) |
|                      |            | C5–O3–Co1      | 117.48(6) |
|                      |            | C2–C1–C4       | 123.81(8) |
|                      |            | C3–C1–C2       | 119.29(8) |
|                      |            | C3–C1–C4       | 116.90(8) |
|                      |            | O3–C2–C1       | 119.01(8) |
|                      |            | O3–C2–C3       | 122.13(8) |
|                      |            | C3–C2–C1       | 118.86(8) |
|                      |            | O1–C4–O2       | 123.12(8) |
|                      |            | O1–C4–C1       | 117.11(8) |
|                      |            | O2–C4–C1       | 119.76(8) |
|                      |            | C1–C3–H3       | 119.1     |
|                      |            | C2–C3–C1       | 121.85(8) |
|                      |            | C2–C3–H3       | 119.1     |
|                      |            | O3–C5–H5A      | 109.5     |
|                      |            | O3–C5–H5B      | 109.5     |
|                      |            | O3–C5–H5C      | 109.5     |
|                      |            | H5A–C5–H5B     | 109.5     |
|                      |            | H5A–C5–H5C     | 109.5     |
|                      |            | H5B–C5–H5C     | 109.5     |

Symmetry transformations used to generate equivalent atoms:

#1: 1-x, 1-y, 1-z; #2: +x, 1-y, -0.5+z; #3: 1-x, +y, 0.5-z; #4: 1.5-x, 1.5-y, 1-z

**Table S5.** Torsion angles for [Co<sup>II</sup>(2,5-DMT)] (1).

| Atom–Atom–Atom–Atom         | Torsion Angle [°] |
|-----------------------------|-------------------|
| Co1 <sup>#1</sup> –O1–C4–O2 | 17.1(1)           |
| Co1 <sup>#1</sup> –O1–C4–C1 | –163.34(6)        |
| Co1–O2–C4–O1                | –116.13(9)        |
| Co1–O2–C4–C1                | 64.3(1)           |
| Co1–O3–C2–C1                | –31.1(1)          |
| Co1–O3–C2–C3                | 149.04(7)         |
| O3–C2–C3–C1 <sup>#2</sup>   | –179.85(9)        |
| C1–C2–C3–C1 <sup>#2</sup>   | 0.3(2)            |
| C2–C1–C4–O1                 | 168.07(9)         |
| C2–C1–C4–O2                 | –12.3(1)          |
| C4–C1–C2–O3                 | 0.5(1)            |
| C4–C1–C2–C3                 | –179.65(8)        |
| C3 <sup>#2</sup> –C1–C2–O3  | 179.85(8)         |
| C3 <sup>#2</sup> –C1–C2–C3  | –0.2(2)           |
| C3 <sup>#2</sup> –C1–C4–O1  | –11.3(1)          |
| C3 <sup>#2</sup> –C1–C4–O2  | 168.25(9)         |
| C5–O3–C2–C1                 | 179.47(9)         |
| C5–O3–C2–C3                 | –0.4(1)           |

Symmetry transformations used to generate equivalent atoms:

#1: 1-x, 1-y, 1-z; #2: 1.5-x, 1.5-y, 1-z

**Table S6.** Crystal data and structure refinement details for [Mg<sub>2</sub>(2,5-DMT)<sub>2</sub>(DMF)<sub>2</sub>] (**4**).

|                                                |                                                                                |
|------------------------------------------------|--------------------------------------------------------------------------------|
| CCDC number                                    | 2225419                                                                        |
| Empirical formula                              | C <sub>26</sub> H <sub>30</sub> Mg <sub>2</sub> N <sub>2</sub> O <sub>14</sub> |
| Formula weight                                 | 643.14                                                                         |
| Temperature [K]                                | 100(2)                                                                         |
| Crystal system                                 | triclinic                                                                      |
| Space group (number)                           | $P\bar{1}$ (2)                                                                 |
| <i>a</i> [Å]                                   | 8.833(3)                                                                       |
| <i>b</i> [Å]                                   | 9.691(3)                                                                       |
| <i>c</i> [Å]                                   | 18.674(6)                                                                      |
| $\alpha$ [°]                                   | 98.274(7)                                                                      |
| $\beta$ [°]                                    | 93.31(1)                                                                       |
| $\gamma$ [°]                                   | 107.308(9)                                                                     |
| Volume [Å <sup>3</sup> ]                       | 1501.6(8)                                                                      |
| <i>Z</i>                                       | 2                                                                              |
| $\rho_{\text{calc}}$ [g·cm <sup>-3</sup> ]     | 1.422                                                                          |
| $\mu$ [mm <sup>-1</sup> ]                      | 0.152                                                                          |
| <i>F</i> (000)                                 | 672                                                                            |
| Crystal size [mm <sup>3</sup> ]                | 0.110×0.110×0.070                                                              |
| Crystal colour                                 | colourless                                                                     |
| Crystal shape                                  | block                                                                          |
| Radiation                                      | MoK $\alpha$ ( $\lambda$ =0.71073 Å)                                           |
| 2 $\theta$ range [°]                           | 4.43 to 50.78 (0.83 Å)                                                         |
| Index ranges                                   | -10 ≤ <i>h</i> ≤ 10<br>-11 ≤ <i>k</i> ≤ 11<br>0 ≤ <i>l</i> ≤ 22                |
| Reflections collected                          | 5584                                                                           |
| Independent reflections                        | 5584<br>$R_{\text{int}}$ = 0.0992<br>$R_{\text{sigma}}$ = 0.0954               |
| Completeness to $\Theta$ = 25.242°             | 100.0 %                                                                        |
| Data / Restraints / Parameters                 | 5584/0/407                                                                     |
| Goodness-of-fit on $F^2$                       | 1.032                                                                          |
| Final <i>R</i> indexes [ $I \geq 2\sigma(I)$ ] | $R_1$ = 0.0744<br>$wR_2$ = 0.1448                                              |
| Final <i>R</i> indexes [all data]              | $R_1$ = 0.1208<br>$wR_2$ = 0.1659                                              |
| Largest peak/hole [eÅ <sup>-3</sup> ]          | 1.36/-0.80                                                                     |
| Extinction coefficient                         | 0.009(2)                                                                       |

**Table S7.** Atomic coordinates and  $U_{eq}$  [Å<sup>2</sup>] for [Mg<sub>2</sub>(2,5-DMT)<sub>2</sub>(DMF)<sub>2</sub>] (**4**).

| Atom | x         | y         | z         | $U_{eq}$  |
|------|-----------|-----------|-----------|-----------|
| C1   | 1.4920(5) | 0.5866(4) | 0.7513(2) | 0.0131(9) |
| C10  | 1.7393(6) | 0.3037(5) | 0.6680(3) | 0.028(1)  |
| C11  | 1.0241(5) | 0.5970(5) | 0.5661(2) | 0.0140(9) |
| C12  | 0.9717(5) | 0.6347(5) | 0.5015(2) | 0.0143(9) |
| C13  | 1.0546(6) | 0.4639(5) | 0.5638(2) | 0.0145(9) |
| C14  | 1.0529(6) | 0.6971(5) | 0.6389(2) | 0.014(1)  |
| C15  | 1.0769(6) | 0.9719(5) | 0.9383(2) | 0.016(1)  |
| C16  | 0.9143(6) | 0.9026(5) | 0.9391(2) | 0.018(1)  |
| C17  | 0.8375(6) | 0.9275(5) | 1.0006(2) | 0.017(1)  |
| C18  | 1.1534(5) | 0.9256(5) | 0.8740(2) | 0.0130(9) |
| C19  | 0.5810(8) | 0.790(1)  | 0.9393(3) | 0.082(3)  |
| C2   | 1.3380(5) | 0.5274(5) | 0.7707(2) | 0.0119(9) |
| C20  | 0.7758(6) | 1.1318(5) | 0.8145(2) | 0.018(1)  |
| C21  | 0.6065(7) | 1.2492(6) | 0.8809(3) | 0.037(1)  |
| C22  | 0.8802(7) | 1.2748(5) | 0.9344(3) | 0.026(1)  |
| C23  | 0.6919(7) | 0.8480(6) | 0.6022(3) | 0.029(1)  |
| C24  | 0.4817(8) | 0.7024(7) | 0.5088(3) | 0.049(2)  |
| C25  | 0.4542(7) | 0.9205(6) | 0.5866(3) | 0.033(1)  |
| C26  | 0.9078(7) | 0.8147(5) | 0.4403(2) | 0.027(1)  |
| C3   | 1.2665(6) | 0.3761(5) | 0.7577(2) | 0.0140(9) |
| C4   | 1.3455(6) | 0.2814(5) | 0.7272(2) | 0.0154(9) |
| C5   | 1.4997(6) | 0.3404(5) | 0.7091(2) | 0.017(1)  |
| C6   | 1.5713(6) | 0.4912(5) | 0.7205(2) | 0.017(1)  |
| C7   | 1.5840(6) | 0.7476(5) | 0.7624(2) | 0.0133(9) |
| C8   | 1.2618(6) | 0.1184(4) | 0.7218(2) | 0.0131(9) |
| C9   | 1.1254(7) | 0.5577(6) | 0.8392(3) | 0.039(2)  |
| H10A | 1.781862  | 0.223881  | 0.650535  | 0.043     |
| H10B | 1.799690  | 0.359054  | 0.714187  | 0.043     |
| H10C | 1.748715  | 0.369104  | 0.631930  | 0.043     |
| H13  | 1.093827  | 0.439560  | 0.607149  | 0.017     |
| H16  | 0.854963  | 0.837360  | 0.897116  | 0.022     |
| H19A | 0.469899  | 0.755559  | 0.949903  | 0.124     |
| H19B | 0.611617  | 0.706477  | 0.915661  | 0.124     |
| H19C | 0.592279  | 0.862387  | 0.906834  | 0.124     |
| H20  | 0.688917  | 1.092511  | 0.777427  | 0.022     |
| H21A | 0.627013  | 1.355640  | 0.890158  | 0.055     |
| H21B | 0.556955  | 1.206872  | 0.921612  | 0.055     |
| H21C | 0.534723  | 1.206527  | 0.835919  | 0.055     |
| H22A | 0.907147  | 1.381842  | 0.945045  | 0.039     |
| H22B | 0.975420  | 1.248105  | 0.922177  | 0.039     |
| H22C | 0.841239  | 1.233288  | 0.977161  | 0.039     |
| H23  | 0.744683  | 0.777617  | 0.588264  | 0.034     |
| H24A | 0.377863  | 0.643924  | 0.520540  | 0.073     |
| H24B | 0.552741  | 0.641560  | 0.503658  | 0.073     |
| H24C | 0.467853  | 0.737801  | 0.463052  | 0.073     |
| H25A | 0.346367  | 0.859528  | 0.592085  | 0.050     |
| H25B | 0.449145  | 0.978485  | 0.548161  | 0.050     |
| H25C | 0.500881  | 0.986399  | 0.632579  | 0.050     |

|      |           |           |            |           |
|------|-----------|-----------|------------|-----------|
| H26A | 0.892490  | 0.911296  | 0.451341   | 0.041     |
| H26B | 0.807946  | 0.742725  | 0.416545   | 0.041     |
| H26C | 0.991633  | 0.819435  | 0.407690   | 0.041     |
| H3   | 1.161207  | 0.336589  | 0.769972   | 0.017     |
| H6   | 1.675823  | 0.530282  | 0.707255   | 0.020     |
| H9A  | 1.147751  | 0.490368  | 0.869751   | 0.058     |
| H9B  | 1.037712  | 0.503458  | 0.801525   | 0.058     |
| H9C  | 1.095264  | 0.634760  | 0.869412   | 0.058     |
| Mg1  | 1.2871(2) | 0.8424(2) | 0.76918(7) | 0.0123(3) |
| Mg2  | 0.9230(2) | 0.9240(2) | 0.73244(7) | 0.0126(3) |
| N1   | 0.7570(5) | 1.2173(4) | 0.8733(2)  | 0.0211(9) |
| N2   | 0.5516(5) | 0.8277(4) | 0.5674(2)  | 0.0241(9) |
| O1   | 1.5079(4) | 0.8396(3) | 0.7668(2)  | 0.0161(7) |
| O10  | 1.2937(4) | 0.9218(3) | 0.8815(2)  | 0.0190(7) |
| O11  | 1.0725(4) | 0.8789(3) | 0.8114(2)  | 0.0141(7) |
| O12  | 0.6802(4) | 0.8540(4) | 1.0044(2)  | 0.0257(8) |
| O13  | 0.9013(4) | 1.0999(3) | 0.8050(2)  | 0.0205(7) |
| O14  | 0.7620(4) | 0.9522(3) | 0.6523(2)  | 0.0192(7) |
| O2   | 1.7320(4) | 0.7788(3) | 0.7656(2)  | 0.0142(7) |
| O3   | 1.1154(4) | 0.0756(3) | 0.7033(2)  | 0.0178(7) |
| O4   | 1.3446(4) | 0.0415(3) | 0.7401(2)  | 0.0196(7) |
| O5   | 1.2646(4) | 0.6227(3) | 0.8057(2)  | 0.0159(7) |
| O6   | 1.5759(4) | 0.2441(3) | 0.6786(2)  | 0.0232(8) |
| O7   | 1.1808(4) | 0.7121(3) | 0.6764(2)  | 0.0181(7) |
| O8   | 0.9484(4) | 0.7534(3) | 0.6577(2)  | 0.0163(7) |
| O9   | 0.9535(4) | 0.7717(3) | 0.5064(2)  | 0.0223(8) |

$U_{eq}$  is defined as 1/3 of the trace of the orthogonalized  $U_{ij}$  tensor.

**Table S8.** Atomic displacement parameters ( $\text{\AA}^2$ ) for  $[\text{Mg}_2(2,5\text{-DMT})_2(\text{DMF})_2]$  (**4**).

|     | $U_{11}$  | $U_{22}$  | $U_{33}$  | $U_{12}$  | $U_{13}$  | $U_{23}$   |
|-----|-----------|-----------|-----------|-----------|-----------|------------|
| C1  | 0.013(3)  | 0.010(2)  | 0.015(2)  | 0.002(2)  | −0.002(2) | 0.000(2)   |
| C10 | 0.015(3)  | 0.021(3)  | 0.050(3)  | 0.004(2)  | 0.011(2)  | 0.005(2)   |
| C11 | 0.014(3)  | 0.017(2)  | 0.010(2)  | 0.005(2)  | 0.003(2)  | −0.003(2)  |
| C12 | 0.014(3)  | 0.014(2)  | 0.016(2)  | 0.008(2)  | 0.001(2)  | 0.001(2)   |
| C13 | 0.018(3)  | 0.016(2)  | 0.010(2)  | 0.008(2)  | −0.001(2) | 0.001(2)   |
| C14 | 0.020(3)  | 0.009(2)  | 0.012(2)  | 0.002(2)  | 0.001(2)  | 0.001(2)   |
| C15 | 0.023(3)  | 0.016(2)  | 0.010(2)  | 0.007(2)  | 0.003(2)  | 0.001(2)   |
| C16 | 0.021(3)  | 0.021(2)  | 0.011(2)  | 0.008(2)  | −0.002(2) | −0.004(2)  |
| C17 | 0.014(3)  | 0.023(2)  | 0.013(2)  | 0.004(2)  | 0.004(2)  | 0.006(2)   |
| C18 | 0.009(3)  | 0.013(2)  | 0.017(2)  | 0.003(2)  | 0.001(2)  | 0.001(2)   |
| C19 | 0.026(4)  | 0.163(9)  | 0.028(4)  | −0.010(5) | −0.005(3) | 0.004(4)   |
| C2  | 0.012(2)  | 0.014(2)  | 0.013(2)  | 0.009(2)  | 0.001(2)  | 0.003(2)   |
| C20 | 0.024(3)  | 0.011(2)  | 0.017(2)  | 0.001(2)  | 0.003(2)  | 0.001(2)   |
| C21 | 0.026(3)  | 0.051(4)  | 0.034(3)  | 0.019(3)  | 0.004(2)  | −0.008(3)  |
| C22 | 0.033(3)  | 0.024(3)  | 0.021(2)  | 0.014(2)  | −0.003(2) | −0.004(2)  |
| C23 | 0.031(3)  | 0.032(3)  | 0.024(3)  | 0.014(3)  | 0.004(2)  | 0.000(2)   |
| C24 | 0.052(5)  | 0.047(4)  | 0.044(4)  | 0.025(3)  | −0.018(3) | −0.015(3)  |
| C25 | 0.033(4)  | 0.036(3)  | 0.034(3)  | 0.014(3)  | 0.008(2)  | 0.006(2)   |
| C26 | 0.047(4)  | 0.023(3)  | 0.017(2)  | 0.021(3)  | −0.004(2) | 0.005(2)   |
| C3  | 0.011(2)  | 0.014(2)  | 0.017(2)  | 0.002(2)  | 0.003(2)  | 0.005(2)   |
| C4  | 0.012(3)  | 0.013(2)  | 0.020(2)  | 0.001(2)  | 0.002(2)  | 0.003(2)   |
| C5  | 0.016(3)  | 0.011(2)  | 0.025(2)  | 0.004(2)  | 0.004(2)  | 0.001(2)   |
| C6  | 0.009(3)  | 0.014(2)  | 0.026(2)  | 0.000(2)  | 0.002(2)  | 0.004(2)   |
| C7  | 0.015(3)  | 0.013(2)  | 0.011(2)  | 0.003(2)  | 0.003(2)  | 0.001(2)   |
| C8  | 0.013(3)  | 0.010(2)  | 0.016(2)  | 0.002(2)  | 0.002(2)  | 0.002(2)   |
| C9  | 0.039(4)  | 0.017(3)  | 0.064(4)  | 0.008(3)  | 0.037(3)  | 0.008(2)   |
| Mg1 | 0.0116(9) | 0.0120(7) | 0.0125(7) | 0.0032(6) | 0.0019(6) | −0.0001(5) |
| Mg2 | 0.0121(8) | 0.0114(7) | 0.0132(7) | 0.0027(6) | 0.0014(6) | 0.0003(5)  |
| N1  | 0.020(2)  | 0.023(2)  | 0.019(2)  | 0.006(2)  | 0.004(2)  | 0.000(2)   |
| N2  | 0.022(3)  | 0.025(2)  | 0.025(2)  | 0.009(2)  | −0.002(2) | −0.002(2)  |
| O1  | 0.016(2)  | 0.013(2)  | 0.021(2)  | 0.006(1)  | 0.004(1)  | 0.003(1)   |
| O10 | 0.018(2)  | 0.025(2)  | 0.014(2)  | 0.009(2)  | 0.002(1)  | −0.002(1)  |
| O11 | 0.014(2)  | 0.014(2)  | 0.011(2)  | 0.002(1)  | 0.002(1)  | −0.001(1)  |
| O12 | 0.014(2)  | 0.036(2)  | 0.018(2)  | −0.002(2) | 0.003(1)  | −0.005(1)  |
| O13 | 0.022(2)  | 0.015(2)  | 0.024(2)  | 0.007(2)  | 0.001(1)  | −0.001(1)  |
| O14 | 0.024(2)  | 0.017(2)  | 0.017(2)  | 0.007(2)  | 0.001(1)  | 0.002(1)   |
| O2  | 0.007(2)  | 0.014(2)  | 0.019(2)  | 0.001(1)  | 0.000(1)  | 0.002(1)   |
| O3  | 0.017(2)  | 0.017(2)  | 0.017(2)  | 0.000(1)  | 0.000(1)  | 0.005(1)   |
| O4  | 0.019(2)  | 0.012(2)  | 0.028(2)  | 0.004(1)  | 0.004(1)  | 0.004(1)   |
| O5  | 0.015(2)  | 0.014(2)  | 0.021(2)  | 0.006(1)  | 0.007(1)  | 0.004(1)   |
| O6  | 0.016(2)  | 0.013(2)  | 0.041(2)  | 0.006(1)  | 0.013(2)  | 0.003(1)   |
| O7  | 0.019(2)  | 0.019(2)  | 0.016(2)  | 0.010(1)  | −0.004(1) | −0.002(1)  |
| O8  | 0.013(2)  | 0.019(2)  | 0.015(2)  | 0.007(1)  | 0.000(1)  | −0.003(1)  |
| O9  | 0.039(2)  | 0.016(2)  | 0.015(2)  | 0.016(2)  | −0.005(1) | 0.000(1)   |

**Table S9.** Bond lengths and angles for [Mg<sub>2</sub>(2,5-DMT)<sub>2</sub>(DMF)<sub>2</sub>] (**4**).

| Atom–Atom             | Length [Å] | Atom–Atom            | Length [Å] |
|-----------------------|------------|----------------------|------------|
| C10–H10A              | 0.9800     | Mg1–Mg2              | 3.585(2)   |
| C10–H10B              | 0.9800     | Mg1–O1               | 1.961(3)   |
| C10–H10C              | 0.9800     | Mg1–O10              | 2.118(3)   |
| C11–C12               | 1.402(6)   | Mg1–O11              | 2.198(3)   |
| C11–C13               | 1.390(6)   | Mg1–O4 <sup>#1</sup> | 2.007(3)   |
| C13–C12 <sup>#4</sup> | 1.398(6)   | Mg1–O5               | 2.284(3)   |
| C13–H13               | 0.9500     | Mg1–O7               | 1.989(3)   |
| C14–C11               | 1.512(6)   | Mg2–O11              | 2.100(3)   |
| C15–C18               | 1.490(6)   | Mg2–O13              | 2.082(3)   |
| C16–C15               | 1.395(7)   | Mg2–O14              | 2.107(3)   |
| C16–C17               | 1.394(6)   | Mg2–O2 <sup>#2</sup> | 2.042(4)   |
| C16–H16               | 0.9500     | Mg2–O3 <sup>#1</sup> | 2.048(4)   |
| C17–C15 <sup>#3</sup> | 1.402(6)   | Mg2–O8               | 2.080(3)   |
| C19–H19A              | 0.9800     | N1–C20               | 1.326(6)   |
| C19–H19B              | 0.9800     | N1–C21               | 1.462(6)   |
| C19–H19C              | 0.9800     | N1–C22               | 1.453(6)   |
| C1–C2                 | 1.400(6)   | N2–C23               | 1.312(7)   |
| C1–C6                 | 1.398(6)   | N2–C24               | 1.464(7)   |
| C20–H20               | 0.9500     | N2–C25               | 1.443(6)   |
| C21–H21A              | 0.9800     | O10–C18              | 1.251(5)   |
| C21–H21B              | 0.9800     | O11–C18              | 1.282(5)   |
| C21–H21C              | 0.9800     | O12–C17              | 1.371(6)   |
| C22–H22A              | 0.9800     | O12–C19              | 1.402(7)   |
| C22–H22B              | 0.9800     | O13–C20              | 1.251(6)   |
| C22–H22C              | 0.9800     | O14–C23              | 1.253(6)   |
| C23–H23               | 0.9500     | O1–C7                | 1.264(5)   |
| C24–H24A              | 0.9800     | O2–C7                | 1.247(5)   |
| C24–H24B              | 0.9800     | O3–C8                | 1.245(5)   |
| C24–H24C              | 0.9800     | O4–C8                | 1.256(5)   |
| C25–H25A              | 0.9800     | O5–C2                | 1.390(5)   |
| C25–H25B              | 0.9800     | O5–C9                | 1.429(6)   |
| C25–H25C              | 0.9800     | O6–C10               | 1.423(6)   |
| C26–H26A              | 0.9800     | O6–C5                | 1.383(5)   |
| C26–H26B              | 0.9800     | O7–C14               | 1.253(5)   |
| C26–H26C              | 0.9800     | O8–C14               | 1.247(5)   |
| C2–C3                 | 1.392(6)   | O9–C12               | 1.375(5)   |
| C3–C4                 | 1.389(6)   | O9–C26               | 1.432(5)   |
| C3–H3                 | 0.9500     |                      |            |
| C4–C5                 | 1.394(7)   |                      |            |
| C4–C8                 | 1.518(6)   |                      |            |
| C5–C6                 | 1.388(6)   |                      |            |
| C6–H6                 | 0.9500     |                      |            |
| C7–C1                 | 1.506(6)   |                      |            |
| C9–H9A                | 0.9800     |                      |            |
| C9–H9B                | 0.9800     |                      |            |
| C9–H9C                | 0.9800     |                      |            |
| Mg1–C18               | 2.501(4)   |                      |            |

| Atom–Atom–Atom | Angle [°] | Atom–Atom–Atom | Angle [°] |
|----------------|-----------|----------------|-----------|
| C11–C13–C12    | 120.8(4)  | C7–O2–Mg2      | 140.0(3)  |
| C11–C13–H13    | 119.6     | C8–O3–Mg2      | 135.2(3)  |
| C12–C11–C14    | 122.7(4)  | C8–O4–Mg1      | 132.4(3)  |
| C12–C13–H13    | 119.6     | C9–O5–Mg1      | 117.4(3)  |
| C12–O9–C26     | 117.4(3)  | H10A–C10–H10B  | 109.5     |
| C13–C11–C12    | 119.3(4)  | H10A–C10–H10C  | 109.5     |
| C13–C11–C14    | 117.9(4)  | H10B–C10–H10C  | 109.5     |
| C13–C12–C11    | 119.8(4)  | H19A–C19–H19B  | 109.5     |
| C14–O7–Mg1     | 132.4(3)  | H19A–C19–H19C  | 109.5     |
| C14–O8–Mg2     | 139.6(3)  | H19B–C19–H19C  | 109.5     |
| C15–C16–H16    | 119.5     | H21A–C21–H21B  | 109.5     |
| C15–C18–Mg1    | 177.7(3)  | H21A–C21–H21C  | 109.5     |
| C16–C15–C17    | 119.2(4)  | H21B–C21–H21C  | 109.5     |
| C16–C15–C18    | 117.5(4)  | H22A–C22–H22B  | 109.5     |
| C16–C17–C15    | 119.7(4)  | H22A–C22–H22C  | 109.5     |
| C17–C15–C18    | 123.1(4)  | H22B–C22–H22C  | 109.5     |
| C17–C16–C15    | 121.1(4)  | H24A–C24–H24B  | 109.5     |
| C17–C16–H16    | 119.5     | H24A–C24–H24C  | 109.5     |
| C17–O12–C19    | 118.6(4)  | H24B–C24–H24C  | 109.5     |
| C18–Mg1–Mg2    | 61.2(1)   | H25A–C25–H25B  | 109.5     |
| C18–O10–Mg1    | 92.2(3)   | H25A–C25–H25C  | 109.5     |
| C18–O11–Mg1    | 87.7(3)   | H25B–C25–H25C  | 109.5     |
| C18–O11–Mg2    | 145.3(3)  | H26A–C26–H26B  | 109.5     |
| C1–C6–H6       | 119.5     | H26A–C26–H26C  | 109.5     |
| C20–N1–C21     | 120.9(4)  | H26B–C26–H26C  | 109.5     |
| C20–N1–C22     | 121.7(4)  | H9A–C9–H9B     | 109.5     |
| C20–O13–Mg2    | 126.4(3)  | H9A–C9–H9C     | 109.5     |
| C22–N1–C21     | 117.3(4)  | H9B–C9–H9C     | 109.5     |
| C23–N2–C24     | 120.9(4)  | Mg2–O11–Mg1    | 113.0(1)  |
| C23–N2–C25     | 122.7(4)  | N1–C20–H20     | 118.1     |
| C23–O14–Mg2    | 119.9(3)  | N1–C21–H21A    | 109.5     |
| C25–N2–C24     | 116.3(4)  | N1–C21–H21B    | 109.5     |
| C2–C1–C7       | 125.4(4)  | N1–C21–H21C    | 109.5     |
| C2–C3–H3       | 119.2     | N1–C22–H22A    | 109.5     |
| C2–O5–C9       | 116.5(3)  | N1–C22–H22B    | 109.5     |
| C2–O5–Mg1      | 120.3(3)  | N1–C22–H22C    | 109.5     |
| C3–C2–C1       | 119.6(4)  | N2–C23–H23     | 117.2     |
| C3–C4–C5       | 118.8(4)  | N2–C24–H24A    | 109.5     |
| C3–C4–C8       | 116.9(4)  | N2–C24–H24B    | 109.5     |
| C4–C3–C2       | 121.6(4)  | N2–C24–H24C    | 109.5     |
| C4–C3–H3       | 119.2     | N2–C25–H25A    | 109.5     |
| C5–C4–C8       | 124.1(4)  | N2–C25–H25B    | 109.5     |
| C5–C6–C1       | 121.0(4)  | N2–C25–H25C    | 109.5     |
| C5–C6–H6       | 119.5     | O10–C18–C15    | 120.4(4)  |
| C5–O6–C10      | 117.4(4)  | O10–C18–Mg1    | 57.8(2)   |
| C6–C1–C2       | 118.8(4)  | O10–C18–O11    | 119.2(4)  |
| C6–C1–C7       | 115.8(4)  | O10–Mg1–C18    | 30.0(1)   |
| C6–C5–C4       | 120.2(4)  | O10–Mg1–Mg2    | 90.5(1)   |
| C7–O1–Mg1      | 138.9(3)  | O10–Mg1–O11    | 60.8(1)   |

| Atom–Atom–Atom | Angle [°] | Atom–Atom–Atom | Angle [°] |
|----------------|-----------|----------------|-----------|
| O10–Mg1–O5     | 84.7(1)   | O4–Mg1–O10     | 94.8(1)   |
| O11–C18–C15    | 120.2(4)  | O4–Mg1–O11     | 89.3(1)   |
| O11–C18–Mg1    | 61.4(2)   | O4–Mg1–O5      | 170.8(2)  |
| O11–Mg1–C18    | 30.8(1)   | O5–C2–C1       | 118.2(4)  |
| O11–Mg1–Mg2    | 32.61(8)  | O5–C2–C3       | 122.1(4)  |
| O11–Mg1–O5     | 98.4(1)   | O5–C9–H9A      | 109.5     |
| O11–Mg2–Mg1    | 34.34(9)  | O5–C9–H9B      | 109.5     |
| O11–Mg2–O14    | 175.6(2)  | O5–C9–H9C      | 109.5     |
| O12–C17–C15    | 118.1(4)  | O5–Mg1–C18     | 92.6(1)   |
| O12–C17–C16    | 122.2(4)  | O5–Mg1–Mg2     | 116.6(1)  |
| O12–C19–H19A   | 109.5     | O6–C10–H10A    | 109.5     |
| O12–C19–H19B   | 109.5     | O6–C10–H10B    | 109.5     |
| O12–C19–H19C   | 109.5     | O6–C10–H10C    | 109.5     |
| O13–C20–H20    | 118.1     | O6–C5–C4       | 117.8(4)  |
| O13–C20–N1     | 123.9(4)  | O6–C5–C6       | 122.0(4)  |
| O13–Mg2–Mg1    | 113.4(1)  | O7–C14–C11     | 115.6(4)  |
| O13–Mg2–O11    | 90.8(1)   | O7–Mg1–C18     | 126.7(2)  |
| O13–Mg2–O14    | 91.8(1)   | O7–Mg1–Mg2     | 74.2(1)   |
| O14–C23–H23    | 117.2     | O7–Mg1–O10     | 152.3(2)  |
| O14–C23–N2     | 125.5(5)  | O7–Mg1–O11     | 97.3(1)   |
| O14–Mg2–Mg1    | 146.2(1)  | O7–Mg1–O4      | 102.1(1)  |
| O1–C7–C1       | 118.8(4)  | O7–Mg1–O5      | 82.0(1)   |
| O1–Mg1–C18     | 129.2(2)  | O8–C14–C11     | 118.8(4)  |
| O1–Mg1–Mg2     | 161.7(1)  | O8–C14–O7      | 125.6(4)  |
| O1–Mg1–O10     | 99.3(1)   | O8–Mg2–Mg1     | 66.6(1)   |
| O1–Mg1–O11     | 160.0(1)  | O8–Mg2–O11     | 90.1(1)   |
| O1–Mg1–O4      | 91.2(1)   | O8–Mg2–O13     | 178.0(2)  |
| O1–Mg1–O5      | 79.9(1)   | O8–Mg2–O14     | 87.4(1)   |
| O1–Mg1–O7      | 102.1(1)  | O9–C12–C11     | 116.7(4)  |
| O2–C7–C1       | 116.1(4)  | O9–C12–C13     | 123.5(4)  |
| O2–C7–O1       | 125.1(4)  | O9–C26–H26A    | 109.5     |
| O2–Mg2–Mg1     | 112.3(1)  | O9–C26–H26B    | 109.5     |
| O2–Mg2–O11     | 89.1(1)   | O9–C26–H26C    | 109.5     |
| O2–Mg2–O13     | 92.7(1)   |                |           |
| O2–Mg2–O14     | 87.2(1)   |                |           |
| O2–Mg2–O3      | 177.6(1)  |                |           |
| O2–Mg2–O8      | 89.1(1)   |                |           |
| O3–C8–C4       | 116.4(4)  |                |           |
| O3–C8–O4       | 126.4(4)  |                |           |
| O3–Mg2–Mg1     | 68.0(1)   |                |           |
| O3–Mg2–O11     | 90.1(1)   |                |           |
| O3–Mg2–O13     | 85.0(1)   |                |           |
| O3–Mg2–O14     | 93.7(1)   |                |           |
| O3–Mg2–O8      | 93.2(1)   |                |           |
| O4–C8–C4       | 117.1(4)  |                |           |
| O4–Mg1–C18     | 91.4(1)   |                |           |
| O4–Mg1–Mg2     | 72.5(1)   |                |           |

Symmetry transformations used to generate equivalent atoms:

#1: +x, 1+y, +z; #2: -1+x, +y, +z; #3: 1+x, +y, +z; #4: +x, -1+y, +z; #5: 2-x, 2-y, 2-z; #6: 2-x, 1-y, 1-z

**Table S10.** Torsion angles for [Mg<sub>2</sub>(2,5-DMT)<sub>2</sub>(DMF)<sub>2</sub>] (**4**).

| Atom–Atom–Atom–Atom            | Torsion Angle [°] | Atom–Atom–Atom–Atom         | Torsion Angle [°] |
|--------------------------------|-------------------|-----------------------------|-------------------|
| C10–O6–C5–C4                   | –173.0(4)         | Mg1–O10–C18–C15             | 178.3(4)          |
| C10–O6–C5–C6                   | 8.1(6)            | Mg1–O10–C18–O11             | 3.3(4)            |
| C12–C11–C13–C12 <sup>#3</sup>  | –2.3(8)           | Mg1–O11–C18–C15             | –178.2(4)         |
| C13–C11–C12–C13 <sup>#3</sup>  | 2.3(8)            | Mg1–O11–C18–O10             | –3.2(4)           |
| C13–C11–C12–O9                 | –175.9(4)         | Mg1–O1–C7–C1                | 4.5(6)            |
| C14–C11–C12–C13 <sup>#3</sup>  | –179.2(4)         | Mg1–O1–C7–O2                | –176.3(3)         |
| C14–C11–C12–O9                 | 2.7(7)            | Mg1–O5–C2–C1                | 41.1(5)           |
| C14–C11–C13–C12 <sup>#3</sup>  | 179.1(4)          | Mg1–O5–C2–C3                | –142.1(3)         |
| C15–C16–C17–C15 <sup>#1</sup>  | 2.5(8)            | Mg1–O7–C14–C11              | 172.9(3)          |
| C15–C16–C17–O12                | –175.9(4)         | Mg1–O7–C14–O8               | –9.6(7)           |
| C16–C15–C18–O10                | –144.7(4)         | Mg2 <sup>#2</sup> –O2–C7–C1 | 141.3(3)          |
| C16–C15–C18–O11                | 30.2(6)           | Mg2 <sup>#2</sup> –O2–C7–O1 | –38.0(7)          |
| C17 <sup>#1</sup> –C15–C18–O10 | 30.3(7)           | Mg2 <sup>#4</sup> –O3–C8–C4 | –141.5(3)         |
| C17 <sup>#1</sup> –C15–C18–O11 | –154.8(4)         | Mg2 <sup>#4</sup> –O3–C8–O4 | 34.3(7)           |
| C17–C16–C15–C17 <sup>#1</sup>  | –2.5(7)           | Mg2–O11–C18–C15             | 52.6(7)           |
| C17–C16–C15–C18                | 172.7(4)          | Mg2–O11–C18–Mg1             | –129.2(5)         |
| C19–O12–C17–C15 <sup>#1</sup>  | 160.5(6)          | Mg2–O11–C18–O10             | –132.4(4)         |
| C19–O12–C17–C16                | –21.1(8)          | Mg2–O13–C20–N1              | 160.7(3)          |
| C1–C2–C3–C4                    | 1.3(6)            | Mg2–O14–C23–N2              | 151.9(4)          |
| C21–N1–C20–O13                 | –179.6(5)         | Mg2–O8–C14–C11              | –163.1(3)         |
| C22–N1–C20–O13                 | –3.7(7)           | Mg2–O8–C14–O7               | 19.4(8)           |
| C24–N2–C23–O14                 | 179.2(6)          | O1–C7–C1–C2                 | –24.3(6)          |
| C25–N2–C23–O14                 | –4.4(8)           | O1–C7–C1–C6                 | 157.1(4)          |
| C26–O9–C12–C11                 | 177.0(4)          | O2–C7–C1–C2                 | 156.5(4)          |
| C26–O9–C12–C13 <sup>#3</sup>   | –1.1(7)           | O2–C7–C1–C6                 | –22.1(6)          |
| C2–C1–C6–C5                    | 0.0(6)            | O5–C2–C3–C4                 | –175.5(4)         |
| C2–C3–C4–C5                    | –0.2(7)           | O6–C5–C6–C1                 | 179.9(4)          |
| C2–C3–C4–C8                    | 174.7(4)          | O7–C14–C11–C12              | –133.8(5)         |
| C3–C4–C5–C6                    | –0.9(7)           | O7–C14–C11–C13              | 44.8(6)           |
| C3–C4–C5–O6                    | –179.8(4)         | O8–C14–C11–C12              | 48.5(6)           |
| C3–C4–C8–O3                    | 40.7(6)           | O8–C14–C11–C13              | –132.9(5)         |
| C3–C4–C8–O4                    | –135.6(4)         |                             |                   |
| C4–C5–C6–C1                    | 1.1(7)            |                             |                   |
| C5–C4–C8–O3                    | –144.7(4)         |                             |                   |
| C5–C4–C8–O4                    | 39.1(6)           |                             |                   |
| C6–C1–C2–C3                    | –1.2(6)           |                             |                   |
| C6–C1–C2–O5                    | 175.7(4)          |                             |                   |
| C7–C1–C2–C3                    | –179.8(4)         |                             |                   |
| C7–C1–C2–O5                    | –2.8(6)           |                             |                   |
| C7–C1–C6–C5                    | 178.7(4)          |                             |                   |
| C8–C4–C5–C6                    | –175.5(4)         |                             |                   |
| C8–C4–C5–O6                    | 5.7(7)            |                             |                   |
| C9–O5–C2–C1                    | –166.1(4)         |                             |                   |
| C9–O5–C2–C3                    | 10.7(6)           |                             |                   |
| Mg1 <sup>#4</sup> –O4–C8–C4    | 160.5(3)          |                             |                   |
| Mg1 <sup>#4</sup> –O4–C8–O3    | –15.3(7)          |                             |                   |

Symmetry transformations used to generate equivalent atoms:

#1: 2-x, 2-y, 2-z; #2: 1+x, +y, +z; #3: 2-x, 1-y, 1-z; #4: +x, -1+y, +z
